# Supplementary material for: Transcriptome Analysis of Yamame (Oncorhynchus masou) in Normal Conditions after Heat Stress
Source: PubMed Central journal article supplement (PMC6628215; doi:10.3390/biology8020021), 2019-03-29
Supplement: biology-08-00021-s001.pdf [file biology-08-00021-s001.pdf]

## Transcriptome analysis of yamame (*Oncorhynchus masou*) in normal conditions after heat stress

Waraporn Kraitavin<sup>1</sup>, Kazutoshi Yoshitake<sup>1</sup>, Yoji Igarashi<sup>1</sup>, Susumu Mitsuyama<sup>1</sup>, Shigeharu Kinoshita<sup>1</sup>, Daisuke Kambayashi<sup>2</sup>, Shugo Watabe<sup>3</sup> and Shuichi Asakawa<sup>1\*</sup>

<sup>1</sup> Graduate School of Agricultural and Life Sciences, The University of Tokyo, Bunkyo, Tokyo 113-8657, Japan; [asakawa@mail.ecc.u-tokyo.ac.jp](mailto:asakawa@mail.ecc.u-tokyo.ac.jp) (S.A.)

<sup>2</sup> Kobayashi Branch, Miyazaki Prefectural Fisheries Research Institute, Kobayashi, Miyazaki 886-0005, Japan

<sup>3</sup> School of Marine Biosciences, Kitasato University, Minami, Sagamihara, Kanagawa 252-0313, Japan; [swatabe@kitasato-u.ac.jp](mailto:swatabe@kitasato-u.ac.jp)

\* Correspondence: [asakawa@mail.ecc.u-tokyo.ac.jp](mailto:asakawa@mail.ecc.u-tokyo.ac.jp) (S.A.)

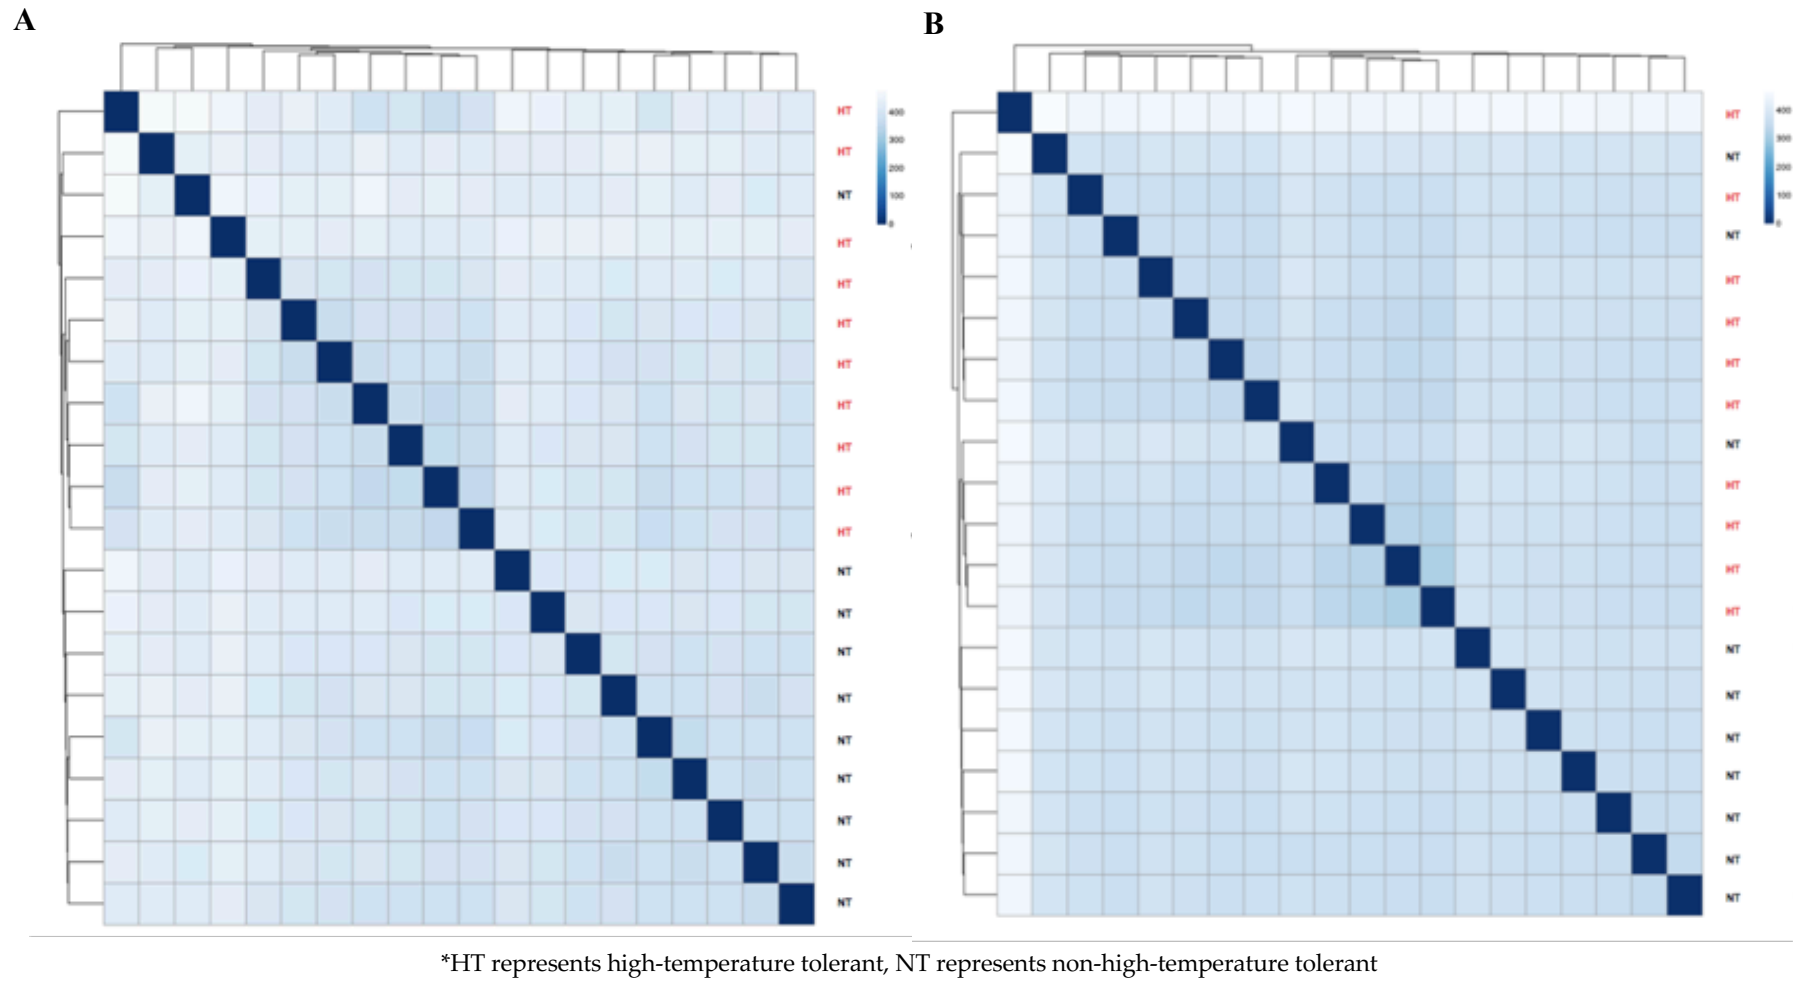

**Figure S1.** The heatmap repeatability analysis of mRNA libraries between samples using the Pearson correlation, (A) gill and (B) fin

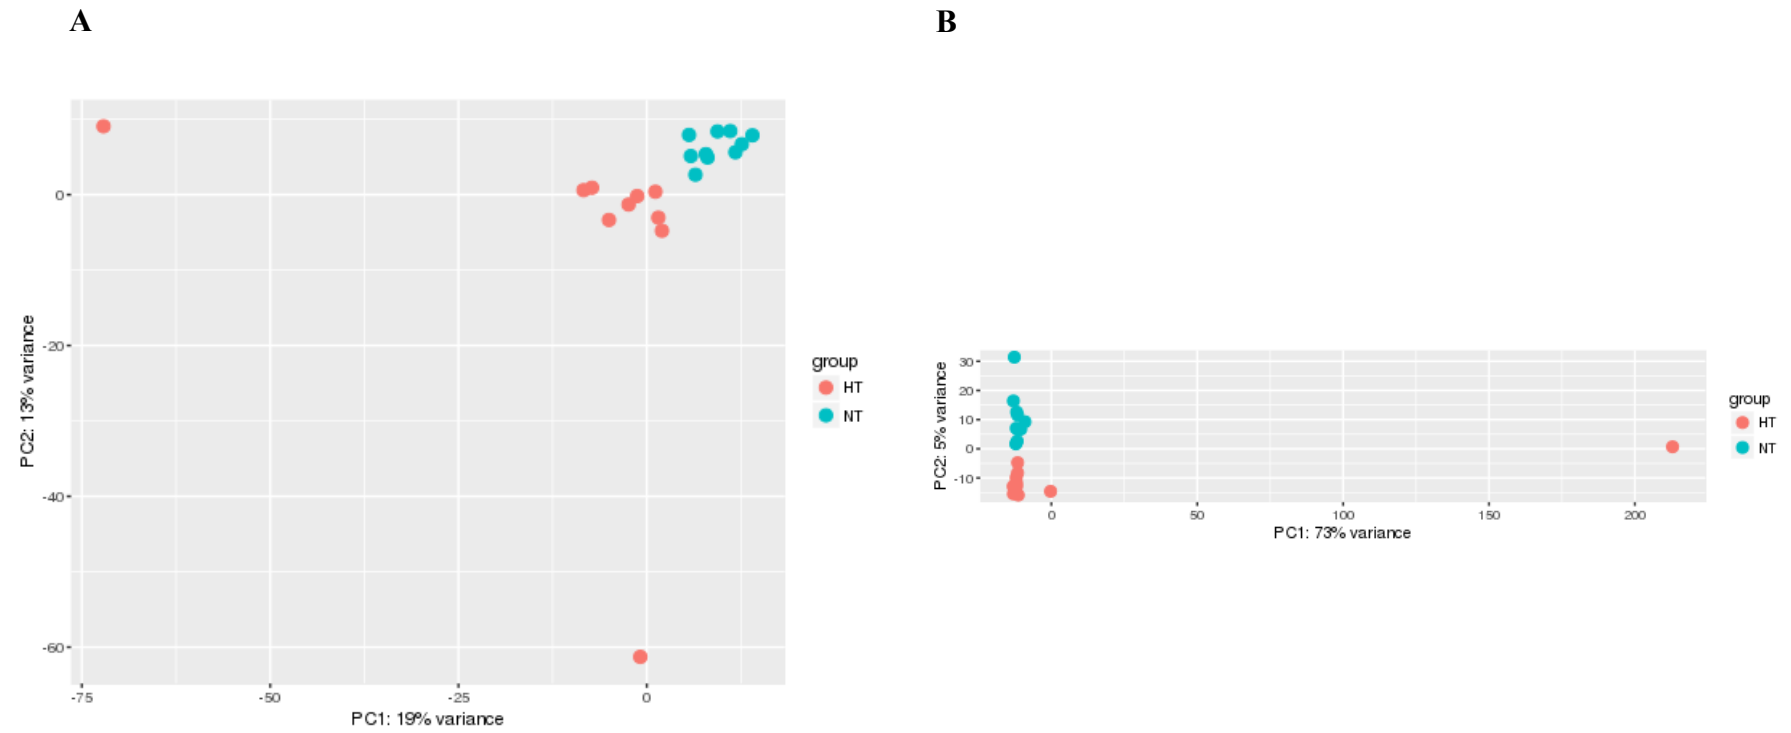

\*HT represents high-temperature tolerant, NT represents non-high-temperature tolerant

**Figure S2.** The PCA analysis of mRNA libraries between samples, (A) gill and (B) fin.

**Table S1.** List of the differentially expressed genes of the gill in yamame

| Gene_id                    | Annotation | HT_TPM | NT_TPM | log2(FoldChange) | P - value |
|----------------------------|------------|--------|--------|------------------|-----------|
| TRINITY_DN100000_c0_g1_i2  | VDAC2      | 27.57  | 17.15  | 0.71             | 0.00      |
| TRINITY_DN100006_c4_g1_i1  |            | 0.65   | 2.69   | -1.93            | 0.00      |
| TRINITY_DN100021_c0_g1_i2  | CXL14      | 0.13   | 4.06   | -4.96            | 0.00      |
| TRINITY_DN100027_c4_g2_i1  | PEAK1      | 1.31   | 4.44   | -1.77            | 0.00      |
| TRINITY_DN100027_c4_g3_i1  |            | 0.17   | 2.38   | -3.18            | 0.00      |
| TRINITY_DN100035_c6_g6_i2  |            | 2.13   | 13.97  | -2.68            | 0.00      |
| TRINITY_DN100055_c1_g2_i1  | 3BHS       | 0.22   | 1.25   | -2.46            | 0.00      |
| TRINITY_DN100058_c6_g2_i1  | OS9        | 1.73   | 0.00   | 7.55             | 0.00      |
| TRINITY_DN100064_c5_g3_i2  |            | 5.39   | 15.59  | -1.53            | 0.00      |
| TRINITY_DN100065_c0_g1_i1  |            | 0.25   | 2.38   | -3.38            | 0.00      |
| TRINITY_DN100077_c3_g2_i2  |            | 15.42  | 30.05  | -1.01            | 0.00      |
| TRINITY_DN100087_c1_g1_i10 | CD83       | 0.20   | 2.87   | -3.57            | 0.00      |
| TRINITY_DN100087_c1_g1_i11 | CD83       | 1.59   | 12.45  | -2.98            | 0.00      |
| TRINITY_DN100087_c1_g1_i6  | CD83       | 2.19   | 7.21   | -1.75            | 0.00      |
| TRINITY_DN100087_c1_g3_i1  |            | 0.18   | 1.25   | -2.70            | 0.00      |
| TRINITY_DN100103_c2_g1_i6  |            | 0.00   | 2.71   | -6.39            | 0.00      |
| TRINITY_DN100111_c3_g7_i1  |            | 1.64   | 7.10   | -2.08            | 0.00      |
| TRINITY_DN100114_c0_g2_i5  | SERPH      | 44.88  | 24.13  | 0.88             | 0.00      |
| TRINITY_DN100121_c14_g1_i1 |            | 0.17   | 7.23   | -4.32            | 0.00      |
| TRINITY_DN100121_c14_g1_i2 |            | 2.76   | 20.16  | -2.78            | 0.00      |
| TRINITY_DN100126_c0_g1_i1  |            | 0.02   | 2.24   | -5.23            | 0.00      |
| TRINITY_DN100131_c11_g2_i2 |            | 0.88   | 3.60   | -2.06            | 0.00      |
| TRINITY_DN100132_c0_g1_i4  | TKT        | 0.13   | 5.46   | -5.36            | 0.00      |
| TRINITY_DN100132_c0_g1_i6  | TKT        | 1.35   | 18.77  | -3.76            | 0.00      |
| TRINITY_DN100148_c4_g1_i4  | SRGP3      | 0.87   | 3.96   | -2.27            | 0.00      |
| TRINITY_DN100150_c0_g2_i1  | TM238      | 9.67   | 24.53  | -1.36            | 0.00      |
| TRINITY_DN100155_c0_g1_i1  | TSP4B      | 14.23  | 6.82   | 1.04             | 0.00      |
| TRINITY_DN100161_c3_g4_i6  | NECP2      | 2.21   | 0.01   | 6.35             | 0.00      |
| TRINITY_DN100165_c14_g2_i1 | DHI1L      | 11.33  | 21.11  | -0.92            | 0.00      |
| TRINITY_DN100166_c1_g1_i9  | SH2D7      | 0.00   | 0.85   | -5.26            | 0.00      |
| TRINITY_DN100186_c4_g1_i1  |            | 7.50   | 26.82  | -1.79            | 0.00      |
| TRINITY_DN100194_c0_g2_i4  | NFKB2      | 5.70   | 10.88  | -0.96            | 0.00      |
| TRINITY_DN100220_c3_g1_i2  | SEM4F      | 0.85   | 1.84   | -1.12            | 0.00      |
| TRINITY_DN100226_c5_g1_i1  | TNR5       | 1.80   | 10.87  | -2.50            | 0.00      |
| TRINITY_DN100226_c5_g1_i2  | TNR5       | 1.67   | 6.18   | -1.89            | 0.00      |
| TRINITY_DN100228_c6_g1_i3  | BANK1      | 6.95   | 14.24  | -1.06            | 0.00      |
| TRINITY_DN100231_c6_g4_i8  | OCLN       | 11.13  | 24.59  | -1.18            | 0.00      |
| TRINITY_DN100237_c5_g1_i1  |            | 0.00   | 5.05   | -5.62            | 0.00      |
| TRINITY_DN100252_c1_g2_i6  | RGS14      | 0.39   | 1.56   | -2.03            | 0.00      |

|                            |       |       |        |       |      |
|----------------------------|-------|-------|--------|-------|------|
| TRINITY_DN100260_c0_g1_i1  | EMIL2 | 0.01  | 4.31   | -8.77 | 0.00 |
| TRINITY_DN100281_c0_g1_i2  |       | 6.13  | 23.91  | -1.98 | 0.00 |
| TRINITY_DN100304_c4_g1_i8  | LCK   | 1.41  | 6.70   | -2.28 | 0.00 |
| TRINITY_DN100310_c4_g1_i1  | TOR4A | 0.23  | 2.03   | -3.03 | 0.00 |
| TRINITY_DN100320_c2_g1_i3  |       | 4.54  | 13.74  | -1.67 | 0.00 |
| TRINITY_DN100333_c0_g1_i3  | UBP47 | 3.49  | 14.59  | -2.08 | 0.00 |
| TRINITY_DN100333_c0_g2_i1  | UB12B | 0.87  | 2.94   | -1.83 | 0.00 |
| TRINITY_DN100333_c0_g2_i2  | UBP5  | 0.93  | 5.42   | -2.53 | 0.00 |
| TRINITY_DN100342_c2_g1_i10 | UAP1  | 1.88  | 4.81   | -1.32 | 0.00 |
| TRINITY_DN100342_c2_g1_i13 | UAP1  | 0.44  | 0.21   | 4.68  | 0.00 |
| TRINITY_DN100344_c2_g1_i2  |       | 0.11  | 3.74   | -3.98 | 0.00 |
| TRINITY_DN100380_c0_g1_i2  |       | 0.00  | 11.76  | -7.84 | 0.00 |
| TRINITY_DN100380_c3_g2_i5  |       | 5.63  | 2.10   | 1.42  | 0.00 |
| TRINITY_DN100403_c5_g1_i4  |       | 7.50  | 33.42  | -2.09 | 0.00 |
| TRINITY_DN100403_c6_g1_i1  | LECA  | 2.25  | 17.02  | -2.93 | 0.00 |
| TRINITY_DN100405_c4_g1_i1  |       | 97.66 | 40.97  | 1.25  | 0.00 |
| TRINITY_DN100408_c3_g1_i2  | C1QB  | 20.75 | 47.59  | -1.22 | 0.00 |
| TRINITY_DN100409_c3_g1_i2  | AGRG5 | 0.00  | 1.97   | -6.10 | 0.00 |
| TRINITY_DN100418_c2_g1_i1  |       | 0.64  | 3.93   | -2.60 | 0.00 |
| TRINITY_DN100423_c0_g1_i1  | SFRP1 | 9.76  | 4.07   | 1.26  | 0.00 |
| TRINITY_DN100424_c0_g4_i2  |       | 1.44  | 5.99   | -2.04 | 0.00 |
| TRINITY_DN100429_c5_g1_i2  | HMX3  | 0.02  | 2.00   | -5.79 | 0.00 |
| TRINITY_DN100429_c5_g1_i5  | HMX3  | 0.36  | 2.36   | -2.83 | 0.00 |
| TRINITY_DN100429_c5_g3_i1  | HMX3  | 0.54  | 9.88   | -3.85 | 0.00 |
| TRINITY_DN100433_c6_g1_i1  |       | 3.96  | 121.43 | -4.92 | 0.00 |
| TRINITY_DN100437_c1_g2_i1  |       | 15.46 | 39.59  | -1.42 | 0.00 |
| TRINITY_DN100447_c0_g1_i3  | SELO  | 0.00  | 0.87   | -5.22 | 0.00 |
| TRINITY_DN100458_c0_g1_i1  | PIM1  | 6.00  | 12.61  | -1.08 | 0.00 |
| TRINITY_DN100458_c0_g1_i2  | PIM1  | 9.30  | 15.06  | -0.71 | 0.00 |
| TRINITY_DN100460_c3_g1_i2  |       | 1.10  | 13.87  | -3.35 | 0.00 |
| TRINITY_DN100462_c3_g1_i2  |       | 0.24  | 4.19   | -4.05 | 0.00 |
| TRINITY_DN100466_c3_g1_i14 |       | 0.36  | 24.42  | -5.05 | 0.00 |
| TRINITY_DN100466_c3_g1_i15 | CUZD1 | 0.01  | 1.42   | -5.66 | 0.00 |
| TRINITY_DN100486_c3_g1_i2  |       | 9.08  | 5.77   | 0.66  | 0.00 |
| TRINITY_DN100486_c4_g3_i2  | SNX9  | 0.00  | 0.73   | -3.69 | 0.00 |
| TRINITY_DN100496_c4_g2_i1  | IFI44 | 6.87  | 55.25  | -2.95 | 0.00 |
| TRINITY_DN100496_c4_g4_i1  |       | 4.41  | 35.20  | -2.96 | 0.00 |
| TRINITY_DN100497_c6_g3_i1  | GIMA4 | 0.17  | 1.62   | -3.42 | 0.00 |
| TRINITY_DN100500_c0_g1_i15 | BTNLA | 7.76  | 0.31   | 4.67  | 0.00 |
| TRINITY_DN100500_c0_g1_i5  | MOG   | 0.00  | 4.85   | -5.59 | 0.00 |
| TRINITY_DN100501_c5_g3_i4  |       | 0.21  | 16.52  | -6.12 | 0.00 |
| TRINITY_DN100518_c3_g2_i6  | SWP70 | 2.18  | 5.73   | -1.44 | 0.00 |

|                            |       |        |        |       |      |
|----------------------------|-------|--------|--------|-------|------|
| TRINITY_DN100519_c4_g1_i1  |       | 1.05   | 5.26   | -2.42 | 0.00 |
| TRINITY_DN100526_c0_g2_i1  | MB212 | 5.14   | 2.92   | 0.82  | 0.00 |
| TRINITY_DN100532_c9_g1_i2  | K1C18 | 1.80   | 7.64   | -2.08 | 0.00 |
| TRINITY_DN100532_c9_g1_i4  | K1C18 | 0.00   | 0.92   | -5.03 | 0.00 |
| TRINITY_DN100537_c1_g2_i10 | S4A7  | 0.04   | 0.57   | -3.72 | 0.00 |
| TRINITY_DN100537_c1_g2_i5  | S4A10 | 1.76   | 3.55   | -1.03 | 0.00 |
| TRINITY_DN100541_c0_g4_i10 | FYN   | 2.36   | 7.51   | -1.65 | 0.00 |
| TRINITY_DN100560_c3_g4_i1  | FUCL4 | 2.74   | 26.50  | -3.28 | 0.00 |
| TRINITY_DN100562_c1_g1_i3  |       | 0.00   | 2.17   | -4.37 | 0.00 |
| TRINITY_DN100562_c1_g1_i4  |       | 0.89   | 10.55  | -3.46 | 0.00 |
| TRINITY_DN100562_c1_g1_i5  |       | 0.00   | 5.43   | -7.00 | 0.00 |
| TRINITY_DN100569_c1_g1_i2  | LY75  | 0.26   | 2.79   | -3.35 | 0.00 |
| TRINITY_DN100569_c1_g1_i5  | LY75  | 0.11   | 2.18   | -4.00 | 0.00 |
| TRINITY_DN100580_c9_g1_i1  |       | 1.00   | 2.19   | -1.11 | 0.00 |
| TRINITY_DN100581_c0_g3_i1  | CLD6  | 0.37   | 12.10  | -5.11 | 0.00 |
| TRINITY_DN100602_c1_g1_i1  |       | 3.98   | 2.45   | 0.70  | 0.00 |
| TRINITY_DN100605_c8_g1_i4  | TVA2  | 0.00   | 0.63   | -4.09 | 0.00 |
| TRINITY_DN100612_c1_g1_i7  | FBX28 | 0.00   | 1.63   | -6.68 | 0.00 |
| TRINITY_DN100613_c0_g1_i7  | KMT2C | 0.01   | 0.74   | -5.19 | 0.00 |
| TRINITY_DN100615_c0_g1_i1  | TSN8  | 92.43  | 148.41 | -0.70 | 0.00 |
| TRINITY_DN100618_c1_g1_i10 | HBA4  | 513.75 | 50.62  | 3.75  | 0.00 |
| TRINITY_DN100620_c1_g2_i10 |       | 0.43   | 9.35   | -3.91 | 0.00 |
| TRINITY_DN100620_c1_g2_i4  |       | 0.00   | 6.34   | -4.52 | 0.00 |
| TRINITY_DN100624_c1_g1_i1  |       | 0.04   | 3.18   | -4.50 | 0.00 |
| TRINITY_DN100624_c1_g1_i10 | ITAE  | 3.12   | 9.92   | -1.74 | 0.00 |
| TRINITY_DN100624_c1_g1_i7  |       | 0.05   | 2.10   | -5.25 | 0.00 |
| TRINITY_DN100635_c2_g2_i1  |       | 0.74   | 2.75   | -1.94 | 0.00 |
| TRINITY_DN100639_c4_g1_i4  | FNDC1 | 5.39   | 2.48   | 1.13  | 0.00 |
| TRINITY_DN100640_c1_g1_i12 | ST3A1 | 3.65   | 0.02   | 6.70  | 0.00 |
| TRINITY_DN100641_c2_g1_i3  | KGUA  | 3.97   | 8.01   | -1.05 | 0.00 |
| TRINITY_DN100644_c3_g1_i2  | CD3E  | 4.89   | 27.77  | -2.52 | 0.00 |
| TRINITY_DN100644_c3_g1_i5  |       | 0.20   | 2.05   | -3.35 | 0.00 |
| TRINITY_DN100644_c3_g4_i1  |       | 9.78   | 46.36  | -2.24 | 0.00 |
| TRINITY_DN100660_c0_g2_i4  | RLF   | 0.08   | 0.75   | -2.93 | 0.00 |
| TRINITY_DN100705_c4_g1_i2  |       | 4.27   | 1.05   | 1.97  | 0.00 |
| TRINITY_DN100705_c5_g1_i10 |       | 0.00   | 5.76   | -6.81 | 0.00 |
| TRINITY_DN100705_c5_g1_i7  |       | 0.00   | 1.52   | -4.89 | 0.00 |
| TRINITY_DN100716_c7_g2_i1  | ZCCHV | 2.41   | 15.61  | -2.68 | 0.00 |
| TRINITY_DN100716_c8_g1_i1  |       | 15.55  | 8.40   | 0.86  | 0.00 |
| TRINITY_DN100730_c0_g2_i6  | MTHSD | 0.00   | 0.52   | -4.40 | 0.00 |
| TRINITY_DN100732_c2_g1_i4  | TNR5  | 0.15   | 1.03   | -2.81 | 0.00 |
| TRINITY_DN100751_c12_g1_i1 |       | 0.04   | 0.87   | -4.33 | 0.00 |

|                             |       |       |       |        |      |
|-----------------------------|-------|-------|-------|--------|------|
| TRINITY_DN100754_c0_g1_i1   | AVIL  | 0.93  | 7.46  | -2.99  | 0.00 |
| TRINITY_DN100754_c0_g1_i3   | AVIL  | 0.90  | 6.12  | -2.75  | 0.00 |
| TRINITY_DN100754_c0_g1_i4   | AVIL  | 1.31  | 8.87  | -2.81  | 0.00 |
| TRINITY_DN100754_c0_g1_i6   | AVIL  | 0.05  | 2.12  | -5.30  | 0.00 |
| TRINITY_DN100755_c0_g1_i2   | BT2A2 | 0.00  | 1.20  | -4.49  | 0.00 |
| TRINITY_DN100758_c5_g1_i1   |       | 50.16 | 27.30 | 0.91   | 0.00 |
| TRINITY_DN100758_c5_g1_i2   |       | 47.53 | 32.35 | 0.59   | 0.00 |
| TRINITY_DN100772_c4_g3_i4   | CAPG  | 0.00  | 1.59  | -4.39  | 0.00 |
| TRINITY_DN100772_c4_g3_i6   | CAPG  | 7.31  | 18.03 | -1.28  | 0.00 |
| TRINITY_DN100773_c0_g2_i13  |       | 0.07  | 1.42  | -3.19  | 0.00 |
| TRINITY_DN100784_c2_g1_i5   | HMR1  | 0.00  | 7.38  | -22.29 | 0.00 |
| TRINITY_DN100785_c1_g1_i3   |       | 0.21  | 4.54  | -4.20  | 0.00 |
| TRINITY_DN100787_c0_g1_i6   | HTR1B | 19.96 | 5.69  | 1.06   | 0.00 |
| TRINITY_DN100796_c0_g4_i1   |       | 11.88 | 3.21  | 1.93   | 0.00 |
| TRINITY_DN100809_c0_g3_i1   |       | 2.05  | 24.10 | -3.60  | 0.00 |
| TRINITY_DN100826_c12_g1_i2  |       | 5.44  | 13.42 | -1.31  | 0.00 |
| TRINITY_DN100851_c1_g3_i1   |       | 1.53  | 4.56  | -1.63  | 0.00 |
| TRINITY_DN100851_c1_g5_i1   |       | 0.00  | 5.48  | -4.12  | 0.00 |
| TRINITY_DN100859_c2_g7_i2   | 5NT3  | 8.82  | 4.22  | 1.07   | 0.00 |
| TRINITY_DN100862_c1_g1_i10  |       | 0.31  | 3.50  | -3.59  | 0.00 |
| TRINITY_DN100862_c1_g1_i11  | AGRG3 | 0.13  | 2.02  | -4.05  | 0.00 |
| TRINITY_DN100862_c1_g1_i12  |       | 0.06  | 0.87  | -3.43  | 0.00 |
| TRINITY_DN100862_c1_g1_i20  | AGRG3 | 0.00  | 2.80  | -7.87  | 0.00 |
| TRINITY_DN100862_c1_g1_i21  | AGRG4 | 0.00  | 0.69  | -5.68  | 0.00 |
| TRINITY_DN100862_c1_g1_i5   | AGRG3 | 0.10  | 1.36  | -3.92  | 0.00 |
| TRINITY_DN100875_c8_g5_i2   |       | 1.10  | 10.19 | -3.19  | 0.00 |
| TRINITY_DN100887_c8_g1_i1   |       | 3.65  | 16.12 | -2.18  | 0.00 |
| TRINITY_DN100899_c0_g1_i3   | ARRD2 | 14.51 | 24.68 | -0.77  | 0.00 |
| TRINITY_DN100899_c0_g1_i7   | ARRD2 | 21.99 | 45.76 | -1.07  | 0.00 |
| TRINITY_DN100905_c1_g1_i1   | BPI   | 14.21 | 38.28 | -1.44  | 0.00 |
| TRINITY_DN100933_c1_g1_i3   | VWDE  | 0.67  | 0.06  | 3.48   | 0.00 |
| TRINITY_DN100936_c0_g1_i3   | M4K3  | 5.65  | 24.41 | -2.13  | 0.00 |
| TRINITY_DN100939_c0_g1_i4   |       | 25.89 | 2.68  | 1.65   | 0.00 |
| TRINITY_DN100947_c11_g1_i11 | VWA7  | 0.30  | 3.81  | -3.65  | 0.00 |
| TRINITY_DN100947_c11_g1_i6  | VWA7  | 0.00  | 0.75  | -4.66  | 0.00 |
| TRINITY_DN100950_c0_g1_i6   | STA13 | 0.00  | 0.62  | -4.33  | 0.00 |
| TRINITY_DN100961_c0_g1_i7   | FGFP2 | 2.96  | 0.54  | 2.45   | 0.00 |
| TRINITY_DN100972_c0_g1_i9   | VSI10 | 0.00  | 1.24  | -6.12  | 0.00 |
| TRINITY_DN100984_c3_g1_i2   | CNN2  | 8.25  | 4.42  | 0.88   | 0.00 |
| TRINITY_DN100991_c2_g1_i2   |       | 4.19  | 11.38 | -1.41  | 0.00 |
| TRINITY_DN100991_c3_g2_i4   | IN80C | 0.00  | 1.27  | -5.00  | 0.00 |
| TRINITY_DN101001_c6_g1_i1   |       | 0.58  | 6.48  | -3.32  | 0.00 |

|                            |       |        |        |       |      |
|----------------------------|-------|--------|--------|-------|------|
| TRINITY_DN101001_c6_g2_i1  | TREF1 | 0.28   | 1.20   | -2.07 | 0.00 |
| TRINITY_DN101019_c0_g1_i12 | SSFA2 | 0.02   | 0.62   | -5.09 | 0.00 |
| TRINITY_DN101021_c5_g1_i1  |       | 0.83   | 3.37   | -2.02 | 0.00 |
| TRINITY_DN101022_c0_g1_i1  | RIN3  | 0.28   | 1.94   | -2.79 | 0.00 |
| TRINITY_DN101029_c0_g1_i17 | F177A | 0.08   | 3.11   | -5.14 | 0.00 |
| TRINITY_DN101036_c1_g1_i3  | RL4B  | 12.52  | 1.36   | 3.39  | 0.00 |
| TRINITY_DN101036_c1_g1_i4  | RL4B  | 0.00   | 5.52   | -7.21 | 0.00 |
| TRINITY_DN101039_c0_g1_i11 | TXLNB | 0.09   | 3.00   | -5.17 | 0.00 |
| TRINITY_DN101039_c0_g1_i3  | TXLNB | 4.48   | 0.02   | 7.82  | 0.00 |
| TRINITY_DN101064_c3_g1_i3  | ODPX  | 2.29   | 0.00   | 7.09  | 0.00 |
| TRINITY_DN101082_c6_g1_i1  | RASF5 | 1.26   | 3.19   | -1.33 | 0.00 |
| TRINITY_DN101082_c6_g2_i2  | RASF5 | 0.89   | 2.68   | -1.58 | 0.00 |
| TRINITY_DN101097_c0_g1_i7  | PKHG3 | 0.00   | 0.64   | -4.63 | 0.00 |
| TRINITY_DN101100_c2_g3_i1  |       | 0.23   | 3.86   | -3.73 | 0.00 |
| TRINITY_DN101103_c5_g1_i1  | RN223 | 0.35   | 1.86   | -2.47 | 0.00 |
| TRINITY_DN101103_c8_g2_i2  |       | 2.09   | 0.08   | 4.07  | 0.00 |
| TRINITY_DN101105_c2_g2_i12 |       | 0.23   | 3.57   | -3.81 | 0.00 |
| TRINITY_DN101105_c2_g2_i6  |       | 1.43   | 6.54   | -2.21 | 0.00 |
| TRINITY_DN101110_c5_g1_i3  | TRI25 | 1.89   | 15.57  | -3.07 | 0.00 |
| TRINITY_DN101113_c1_g1_i1  | ANKL2 | 0.00   | 7.81   | -4.25 | 0.00 |
| TRINITY_DN101114_c3_g1_i1  |       | 0.10   | 1.60   | -3.35 | 0.00 |
| TRINITY_DN101116_c1_g1_i7  | I13R2 | 2.42   | 4.68   | -0.91 | 0.00 |
| TRINITY_DN101127_c4_g2_i2  |       | 2.02   | 10.43  | -2.38 | 0.00 |
| TRINITY_DN101129_c0_g1_i1  | C1GLT | 0.10   | 3.56   | -4.35 | 0.00 |
| TRINITY_DN101129_c0_g1_i2  | C1GLT | 1.25   | 14.70  | -3.59 | 0.00 |
| TRINITY_DN101129_c0_g3_i1  |       | 0.83   | 7.81   | -3.30 | 0.00 |
| TRINITY_DN101135_c4_g1_i14 | LIPO  | 444.07 | 144.53 | 1.69  | 0.00 |
| TRINITY_DN101135_c4_g1_i16 | LIPO  | 41.73  | 3.11   | 3.99  | 0.00 |
| TRINITY_DN101135_c4_g1_i18 |       | 5.01   | 6.38   | -3.45 | 0.00 |
| TRINITY_DN101137_c5_g1_i2  | GSTA  | 97.43  | 54.20  | 0.82  | 0.00 |
| TRINITY_DN101149_c0_g1_i1  | GPR34 | 0.62   | 2.26   | -1.89 | 0.00 |
| TRINITY_DN101149_c0_g2_i1  | GPR34 | 0.29   | 1.50   | -2.32 | 0.00 |
| TRINITY_DN101151_c2_g1_i2  |       | 0.00   | 4.31   | -7.12 | 0.00 |
| TRINITY_DN101167_c8_g1_i1  | LYSC2 | 118.31 | 490.99 | -2.09 | 0.00 |
| TRINITY_DN101167_c8_g1_i2  | LYSC2 | 8.55   | 39.04  | -2.21 | 0.00 |
| TRINITY_DN101184_c11_g1_i5 | SLAF8 | 0.17   | 1.69   | -3.21 | 0.00 |
| TRINITY_DN101193_c11_g2_i2 |       | 0.00   | 19.11  | -8.37 | 0.00 |
| TRINITY_DN101193_c11_g2_i3 |       | 0.20   | 8.81   | -5.38 | 0.00 |
| TRINITY_DN101193_c11_g3_i1 |       | 0.05   | 8.88   | -6.81 | 0.00 |
| TRINITY_DN101195_c2_g2_i1  |       | 0.99   | 4.76   | -2.39 | 0.00 |
| TRINITY_DN101196_c1_g1_i1  |       | 0.05   | 1.28   | -4.78 | 0.00 |
| TRINITY_DN101196_c1_g1_i10 | GPSM2 | 10.44  | 20.41  | -1.00 | 0.00 |



|                            |       |       |        |        |      |
|----------------------------|-------|-------|--------|--------|------|
| TRINITY_DN101196_c1_g1_i5  | GPSM1 | 8.42  | 21.64  | -1.41  | 0.00 |
| TRINITY_DN101196_c1_g2_i1  |       | 8.94  | 21.48  | -1.29  | 0.00 |
| TRINITY_DN101210_c7_g1_i2  |       | 2.43  | 0.05   | 3.89   | 0.00 |
| TRINITY_DN101211_c0_g1_i1  | IRF3  | 1.97  | 5.22   | -1.47  | 0.00 |
| TRINITY_DN101215_c1_g2_i2  | NACA  | 0.02  | 6.64   | -22.75 | 0.00 |
| TRINITY_DN101230_c2_g1_i8  |       | 10.46 | 28.41  | -1.46  | 0.00 |
| TRINITY_DN101230_c2_g1_i9  | IAN1  | 13.05 | 49.42  | -1.91  | 0.00 |
| TRINITY_DN101230_c2_g4_i1  |       | 8.10  | 43.45  | -2.45  | 0.00 |
| TRINITY_DN101230_c2_g4_i2  |       | 0.18  | 1.75   | -3.19  | 0.00 |
| TRINITY_DN101230_c2_g5_i1  |       | 2.24  | 5.80   | -1.41  | 0.00 |
| TRINITY_DN101232_c0_g1_i1  |       | 2.11  | 13.85  | -2.68  | 0.00 |
| TRINITY_DN101236_c0_g1_i3  | GMIP  | 0.49  | 3.13   | -2.69  | 0.00 |
| TRINITY_DN101240_c3_g4_i1  | PNPH  | 0.99  | 2.88   | -1.56  | 0.00 |
| TRINITY_DN101242_c5_g1_i2  | CY1   | 0.00  | 18.70  | -8.98  | 0.00 |
| TRINITY_DN101242_c5_g1_i6  | CY1   | 84.36 | 44.63  | 0.93   | 0.00 |
| TRINITY_DN101267_c4_g1_i11 | AGRG3 | 0.16  | 1.81   | -3.38  | 0.00 |
| TRINITY_DN101267_c4_g1_i13 | AGRG3 | 0.06  | 4.21   | -6.29  | 0.00 |
| TRINITY_DN101267_c4_g1_i15 |       | 1.62  | 11.60  | -2.75  | 0.00 |
| TRINITY_DN101267_c4_g1_i7  | AGRG3 | 0.15  | 3.23   | -4.47  | 0.00 |
| TRINITY_DN101272_c2_g1_i1  | PR38B | 0.00  | 1.51   | -6.49  | 0.00 |
| TRINITY_DN101283_c11_g1_i5 | F177A | 0.78  | 2.20   | -1.51  | 0.00 |
| TRINITY_DN101294_c1_g3_i1  |       | 0.78  | 4.22   | -2.45  | 0.00 |
| TRINITY_DN101294_c1_g5_i3  | TCA   | 8.91  | 44.96  | -2.36  | 0.00 |
| TRINITY_DN101327_c1_g1_i4  | PGH2  | 0.70  | 2.53   | -1.90  | 0.00 |
| TRINITY_DN101345_c6_g1_i1  | TM234 | 0.00  | 1.55   | -5.44  | 0.00 |
| TRINITY_DN101346_c1_g1_i9  | IGHM  | 0.03  | 1.30   | -4.98  | 0.00 |
| TRINITY_DN101359_c3_g3_i4  | RHG12 | 0.00  | 3.30   | -6.23  | 0.00 |
| TRINITY_DN101368_c2_g1_i7  | SH3K1 | 4.12  | 9.03   | -1.15  | 0.00 |
| TRINITY_DN101371_c1_g1_i1  |       | 1.42  | 10.03  | -2.81  | 0.00 |
| TRINITY_DN101371_c1_g1_i2  |       | 0.69  | 13.94  | -3.99  | 0.00 |
| TRINITY_DN101375_c6_g2_i1  | U119A | 0.77  | 2.63   | -1.80  | 0.00 |
| TRINITY_DN101377_c5_g1_i2  |       | 0.00  | 8.47   | -4.39  | 0.00 |
| TRINITY_DN101383_c2_g2_i1  |       | 0.68  | 2.57   | -1.89  | 0.00 |
| TRINITY_DN101389_c7_g1_i1  | CDO1  | 2.77  | 100.09 | -5.07  | 0.00 |
| TRINITY_DN101389_c7_g1_i2  | CDO1  | 0.05  | 1.30   | -4.33  | 0.00 |
| TRINITY_DN101389_c7_g1_i4  | CDO1  | 0.07  | 3.94   | -5.81  | 0.00 |
| TRINITY_DN101397_c4_g4_i1  | RHOG  | 6.21  | 15.75  | -1.37  | 0.00 |
| TRINITY_DN101399_c2_g2_i2  | ZBED4 | 0.00  | 2.53   | -6.48  | 0.00 |
| TRINITY_DN101409_c4_g7_i10 | PXDN  | 0.78  | 7.13   | -3.22  | 0.00 |
| TRINITY_DN101409_c4_g7_i3  |       | 2.31  | 14.80  | -2.76  | 0.00 |
| TRINITY_DN101438_c1_g1_i4  | AB1IP | 0.36  | 1.20   | -1.70  | 0.00 |
| TRINITY_DN101464_c9_g1_i4  | TCB2  | 0.50  | 4.04   | -2.91  | 0.00 |

|                            |       |        |        |       |      |
|----------------------------|-------|--------|--------|-------|------|
| TRINITY_DN101476_c0_g1_i1  | WASP  | 3.46   | 9.23   | -1.41 | 0.00 |
| TRINITY_DN101478_c0_g1_i9  | 3BP2  | 0.33   | 1.24   | -1.94 | 0.00 |
| TRINITY_DN101481_c2_g1_i4  | SYSC  | 11.20  | 21.47  | -0.92 | 0.00 |
| TRINITY_DN101486_c2_g1_i11 |       | 1.24   | 0.23   | 2.36  | 0.00 |
| TRINITY_DN101486_c2_g2_i1  |       | 110.83 | 18.37  | 2.48  | 0.00 |
| TRINITY_DN101488_c1_g1_i3  | PTPRC | 11.90  | 28.64  | -1.30 | 0.00 |
| TRINITY_DN101489_c1_g1_i6  | PLCL1 | 0.43   | 0.00   | 5.89  | 0.00 |
| TRINITY_DN101496_c4_g3_i1  |       | 1.16   | 3.73   | -1.69 | 0.00 |
| TRINITY_DN101530_c1_g1_i8  | VMP1  | 0.01   | 0.85   | -4.26 | 0.00 |
| TRINITY_DN101545_c10_g2_i5 |       | 0.00   | 0.58   | -4.99 | 0.00 |
| TRINITY_DN101546_c0_g1_i2  | ALS   | 0.21   | 1.30   | -2.54 | 0.00 |
| TRINITY_DN101554_c1_g4_i1  | SELN  | 7.74   | 4.92   | 0.62  | 0.00 |
| TRINITY_DN101571_c2_g5_i1  | HELZ2 | 0.22   | 1.83   | -3.01 | 0.00 |
| TRINITY_DN101580_c0_g1_i6  | MGT4A | 0.11   | 0.96   | -3.10 | 0.00 |
| TRINITY_DN101590_c2_g1_i7  | CSK22 | 0.66   | 0.03   | 4.53  | 0.00 |
| TRINITY_DN101593_c0_g1_i2  | LAYN  | 0.98   | 0.05   | 4.24  | 0.00 |
| TRINITY_DN101596_c1_g2_i1  | IL17  | 0.34   | 3.09   | -3.15 | 0.00 |
| TRINITY_DN101599_c4_g1_i3  | URGCP | 0.00   | 0.54   | -4.85 | 0.00 |
| TRINITY_DN101608_c1_g2_i1  | FCGR4 | 0.23   | 1.93   | -2.88 | 0.00 |
| TRINITY_DN101610_c5_g5_i1  |       | 0.14   | 6.10   | -4.40 | 0.00 |
| TRINITY_DN101617_c7_g1_i1  | AEBP1 | 11.25  | 5.64   | 0.99  | 0.00 |
| TRINITY_DN101659_c1_g1_i2  | PRDM1 | 0.89   | 4.88   | -2.45 | 0.00 |
| TRINITY_DN101660_c5_g2_i1  |       | 36.43  | 189.00 | -2.46 | 0.00 |
| TRINITY_DN101661_c6_g1_i5  |       | 0.19   | 5.06   | -4.90 | 0.00 |
| TRINITY_DN101681_c1_g1_i1  | LXN   | 9.96   | 4.55   | 1.11  | 0.00 |
| TRINITY_DN101693_c3_g2_i1  | IL6RB | 0.14   | 1.96   | -3.85 | 0.00 |
| TRINITY_DN101693_c5_g1_i1  |       | 18.54  | 6.27   | 1.58  | 0.00 |
| TRINITY_DN101694_c0_g1_i10 | SEC62 | 0.48   | 0.00   | 5.24  | 0.00 |
| TRINITY_DN101694_c0_g1_i12 | SEC62 | 2.01   | 0.00   | 7.60  | 0.00 |
| TRINITY_DN101700_c14_g1_i1 |       | 1.43   | 37.42  | -4.24 | 0.00 |
| TRINITY_DN101704_c3_g1_i3  | CD28  | 1.39   | 6.83   | -2.29 | 0.00 |
| TRINITY_DN101704_c3_g1_i5  | CD28  | 0.98   | 3.65   | -1.93 | 0.00 |
| TRINITY_DN101704_c3_g1_i9  | CD28  | 0.81   | 3.50   | -2.09 | 0.00 |
| TRINITY_DN101706_c2_g1_i1  |       | 0.12   | 13.05  | -6.24 | 0.00 |
| TRINITY_DN101714_c0_g1_i2  |       | 102.77 | 354.12 | -1.76 | 0.00 |
| TRINITY_DN101714_c0_g2_i1  |       | 3.92   | 14.03  | -1.89 | 0.00 |
| TRINITY_DN101726_c0_g3_i1  | RDH7  | 18.05  | 8.85   | 1.04  | 0.00 |
| TRINITY_DN101726_c0_g3_i3  | RDH2  | 4.48   | 0.93   | 2.24  | 0.00 |
| TRINITY_DN101735_c1_g4_i1  |       | 45.62  | 175.66 | -1.91 | 0.00 |
| TRINITY_DN101741_c0_g1_i1  | URP2  | 0.68   | 3.58   | -2.35 | 0.00 |
| TRINITY_DN101741_c1_g2_i3  | TRPT1 | 0.33   | 3.18   | -3.30 | 0.00 |
| TRINITY_DN101746_c6_g1_i1  |       | 0.09   | 3.12   | -3.79 | 0.00 |

|                            |       |        |        |       |      |
|----------------------------|-------|--------|--------|-------|------|
| TRINITY_DN101747_c0_g2_i5  | PARP8 | 0.10   | 1.05   | -3.59 | 0.00 |
| TRINITY_DN101758_c3_g3_i1  | SHIP1 | 2.25   | 8.03   | -1.76 | 0.00 |
| TRINITY_DN101825_c1_g1_i2  |       | 2.58   | 5.27   | -1.02 | 0.00 |
| TRINITY_DN101852_c0_g1_i4  | FGOP2 | 0.77   | 0.03   | 4.59  | 0.00 |
| TRINITY_DN101854_c5_g4_i2  |       | 0.16   | 1.02   | -2.56 | 0.00 |
| TRINITY_DN101862_c0_g3_i9  |       | 0.58   | 5.19   | -3.16 | 0.00 |
| TRINITY_DN101899_c8_g4_i1  |       | 12.85  | 0.26   | 4.57  | 0.00 |
| TRINITY_DN101901_c0_g1_i3  | CNTN1 | 23.72  | 56.33  | -1.27 | 0.00 |
| TRINITY_DN101901_c0_g2_i1  |       | 306.47 | 630.06 | -1.07 | 0.00 |
| TRINITY_DN101903_c1_g1_i15 | LYN   | 2.43   | 6.23   | -1.40 | 0.00 |
| TRINITY_DN101909_c3_g4_i2  |       | 0.85   | 14.22  | -4.06 | 0.00 |
| TRINITY_DN101912_c5_g1_i1  | TRFR  | 0.13   | 0.78   | -2.49 | 0.00 |
| TRINITY_DN101918_c1_g1_i2  | PRRX1 | 9.52   | 2.12   | 0.99  | 0.00 |
| TRINITY_DN101923_c3_g1_i2  | PSD4  | 0.78   | 2.62   | -1.75 | 0.00 |
| TRINITY_DN101928_c1_g3_i1  | ZFAN6 | 0.73   | 7.85   | -3.68 | 0.00 |
| TRINITY_DN101932_c4_g3_i1  |       | 0.72   | 2.07   | -1.52 | 0.00 |
| TRINITY_DN101933_c0_g3_i1  |       | 12.31  | 34.27  | -1.50 | 0.00 |
| TRINITY_DN101943_c1_g1_i1  |       | 6.79   | 0.43   | 4.21  | 0.00 |
| TRINITY_DN101947_c0_g3_i3  | RRBP1 | 0.99   | 0.00   | 6.84  | 0.00 |
| TRINITY_DN101955_c0_g1_i11 | ELF1  | 0.00   | 2.63   | -7.58 | 0.00 |
| TRINITY_DN101955_c0_g1_i3  | ELF1  | 0.00   | 0.47   | -5.18 | 0.00 |
| TRINITY_DN101959_c5_g1_i3  |       | 0.05   | 2.26   | -5.41 | 0.00 |
| TRINITY_DN101966_c3_g4_i1  | P2RX1 | 2.49   | 15.59  | -2.59 | 0.00 |
| TRINITY_DN101966_c3_g9_i1  | BTLA  | 0.20   | 1.25   | -3.03 | 0.00 |
| TRINITY_DN101974_c1_g1_i15 |       | 3.71   | 12.08  | -1.73 | 0.00 |
| TRINITY_DN101974_c1_g1_i5  |       | 2.70   | 14.72  | -2.42 | 0.00 |
| TRINITY_DN101974_c1_g1_i8  |       | 1.23   | 0.01   | 4.59  | 0.00 |
| TRINITY_DN101974_c1_g2_i2  |       | 1.33   | 36.33  | -4.78 | 0.00 |
| TRINITY_DN101982_c6_g1_i1  |       | 5.12   | 2.78   | 0.88  | 0.00 |
| TRINITY_DN101987_c2_g1_i2  |       | 0.11   | 1.78   | -3.94 | 0.00 |
| TRINITY_DN101999_c2_g1_i14 |       | 0.05   | 3.16   | -5.66 | 0.00 |
| TRINITY_DN101999_c2_g1_i8  |       | 0.06   | 1.56   | -5.11 | 0.00 |
| TRINITY_DN102001_c1_g1_i1  |       | 9.22   | 51.54  | -2.43 | 0.00 |
| TRINITY_DN102004_c7_g1_i3  | TLR13 | 1.94   | 3.22   | -0.74 | 0.00 |
| TRINITY_DN102017_c1_g2_i2  | TBCD1 | 0.08   | 1.25   | -3.90 | 0.00 |
| TRINITY_DN102031_c5_g1_i11 | RABX5 | 0.01   | 1.83   | -6.24 | 0.00 |
| TRINITY_DN102039_c0_g1_i11 | HAUS6 | 0.06   | 0.95   | -3.90 | 0.00 |
| TRINITY_DN102042_c5_g2_i5  | CD2AP | 0.19   | 5.61   | -4.84 | 0.00 |
| TRINITY_DN102045_c4_g1_i2  | FER   | 0.01   | 1.20   | -6.52 | 0.00 |
| TRINITY_DN102073_c4_g1_i3  |       | 1.95   | 0.13   | 3.73  | 0.00 |
| TRINITY_DN102073_c4_g1_i4  | TBFG  | 34.23  | 7.93   | 1.19  | 0.00 |
| TRINITY_DN102081_c4_g1_i1  | RHG30 | 0.86   | 3.89   | -2.26 | 0.00 |

|                            |       |       |        |       |      |
|----------------------------|-------|-------|--------|-------|------|
| TRINITY_DN102081_c4_g2_i1  | RHG30 | 1.20  | 4.16   | -1.81 | 0.00 |
| TRINITY_DN102082_c1_g3_i4  | SH3L3 | 10.73 | 21.11  | -0.97 | 0.00 |
| TRINITY_DN102083_c4_g1_i12 | RHG32 | 0.15  | 1.89   | -3.83 | 0.00 |
| TRINITY_DN102091_c0_g1_i1  | MUC5B | 0.40  | 16.91  | -5.24 | 0.00 |
| TRINITY_DN102091_c0_g1_i10 |       | 1.73  | 70.26  | -5.38 | 0.00 |
| TRINITY_DN102091_c0_g1_i11 |       | 2.70  | 131.16 | -5.53 | 0.00 |
| TRINITY_DN102091_c0_g1_i13 |       | 0.34  | 21.35  | -5.72 | 0.00 |
| TRINITY_DN102091_c0_g1_i15 |       | 1.00  | 46.20  | -5.37 | 0.00 |
| TRINITY_DN102091_c0_g1_i16 |       | 1.08  | 19.66  | -4.15 | 0.00 |
| TRINITY_DN102091_c0_g1_i18 |       | 0.00  | 37.26  | -6.35 | 0.00 |
| TRINITY_DN102091_c0_g1_i20 | MUC5B | 0.18  | 16.03  | -6.36 | 0.00 |
| TRINITY_DN102091_c0_g1_i24 |       | 0.15  | 26.79  | -7.14 | 0.00 |
| TRINITY_DN102091_c0_g1_i27 |       | 2.51  | 105.44 | -5.24 | 0.00 |
| TRINITY_DN102091_c0_g1_i3  |       | 0.00  | 29.61  | -5.66 | 0.00 |
| TRINITY_DN102091_c0_g1_i4  |       | 0.00  | 34.92  | -6.11 | 0.00 |
| TRINITY_DN102091_c0_g1_i5  |       | 0.39  | 14.45  | -3.93 | 0.00 |
| TRINITY_DN102091_c0_g1_i6  |       | 0.00  | 2.23   | -4.61 | 0.00 |
| TRINITY_DN102091_c0_g1_i7  |       | 1.72  | 51.64  | -4.79 | 0.00 |
| TRINITY_DN102091_c0_g1_i8  |       | 1.02  | 64.30  | -6.07 | 0.00 |
| TRINITY_DN102106_c0_g4_i1  |       | 29.56 | 85.38  | -1.61 | 0.00 |
| TRINITY_DN102107_c3_g1_i3  |       | 4.05  | 17.10  | -1.99 | 0.00 |
| TRINITY_DN102120_c2_g1_i6  |       | 6.22  | 17.26  | -1.46 | 0.00 |
| TRINITY_DN102129_c0_g4_i1  |       | 2.98  | 13.29  | -2.09 | 0.00 |
| TRINITY_DN102132_c1_g3_i1  |       | 6.17  | 2.76   | 1.12  | 0.00 |
| TRINITY_DN102136_c0_g2_i3  |       | 32.55 | 89.86  | -1.49 | 0.00 |
| TRINITY_DN102147_c3_g1_i1  | NUB1  | 1.69  | 14.72  | -3.12 | 0.00 |
| TRINITY_DN102155_c0_g1_i4  | PPTC7 | 0.04  | 0.82   | -4.14 | 0.00 |
| TRINITY_DN102161_c3_g1_i1  | TNF14 | 0.54  | 4.90   | -3.15 | 0.00 |
| TRINITY_DN102161_c3_g1_i3  | TNF14 | 0.24  | 1.81   | -2.77 | 0.00 |
| TRINITY_DN102161_c3_g1_i4  | TNF14 | 1.06  | 4.98   | -2.23 | 0.00 |
| TRINITY_DN102161_c3_g3_i1  |       | 0.38  | 12.51  | -4.27 | 0.00 |
| TRINITY_DN102170_c0_g1_i4  | DNS2A | 7.74  | 15.07  | -0.97 | 0.00 |
| TRINITY_DN102170_c0_g1_i5  | DNS2A | 7.02  | 16.43  | -1.26 | 0.00 |
| TRINITY_DN102170_c0_g3_i1  | DNS2A | 9.42  | 23.88  | -1.34 | 0.00 |
| TRINITY_DN102171_c0_g1_i1  | TRI69 | 0.88  | 0.00   | 5.75  | 0.00 |
| TRINITY_DN102184_c4_g3_i3  | C1GLT | 2.11  | 17.08  | -3.07 | 0.00 |
| TRINITY_DN102184_c4_g3_i5  |       | 0.00  | 4.68   | -4.87 | 0.00 |
| TRINITY_DN102187_c10_g1_i1 |       | 7.03  | 27.58  | -1.91 | 0.00 |
| TRINITY_DN102198_c6_g3_i1  |       | 0.07  | 1.86   | -3.88 | 0.00 |
| TRINITY_DN102203_c2_g1_i1  | SPT13 | 2.87  | 0.22   | 3.71  | 0.00 |
| TRINITY_DN102203_c2_g1_i8  | SPT13 | 0.00  | 1.61   | -6.66 | 0.00 |
| TRINITY_DN102205_c0_g2_i11 | WASP  | 0.22  | 4.31   | -4.38 | 0.00 |

|                            |       |       |        |       |      |
|----------------------------|-------|-------|--------|-------|------|
| TRINITY_DN102205_c0_g2_i6  | WASP  | 0.04  | 1.66   | -5.26 | 0.00 |
| TRINITY_DN102205_c0_g2_i7  | WASL  | 0.28  | 3.20   | -3.55 | 0.00 |
| TRINITY_DN102208_c3_g1_i1  | ESPN  | 0.60  | 1.87   | -1.62 | 0.00 |
| TRINITY_DN102225_c3_g1_i8  |       | 0.00  | 2.81   | -6.59 | 0.00 |
| TRINITY_DN102239_c7_g1_i5  | FIS1  | 0.00  | 3.56   | -6.38 | 0.00 |
| TRINITY_DN102241_c0_g1_i15 | HCFC1 | 0.10  | 1.82   | -4.07 | 0.00 |
| TRINITY_DN102242_c0_g1_i4  |       | 0.24  | 2.98   | -3.30 | 0.00 |
| TRINITY_DN102242_c0_g4_i1  |       | 0.84  | 20.57  | -4.66 | 0.00 |
| TRINITY_DN102242_c0_g6_i1  |       | 0.00  | 3.68   | -6.11 | 0.00 |
| TRINITY_DN102265_c1_g1_i1  |       | 0.77  | 14.34  | -4.09 | 0.00 |
| TRINITY_DN102280_c4_g1_i7  |       | 0.00  | 2.04   | -7.39 | 0.00 |
| TRINITY_DN102317_c12_g1_i1 |       | 0.88  | 4.36   | -2.26 | 0.00 |
| TRINITY_DN102318_c3_g5_i5  |       | 0.11  | 3.35   | -4.87 | 0.00 |
| TRINITY_DN102319_c6_g1_i1  | LAMC3 | 2.17  | 0.94   | 1.19  | 0.00 |
| TRINITY_DN102324_c6_g1_i3  | SAMD9 | 2.25  | 5.14   | -1.19 | 0.00 |
| TRINITY_DN102336_c4_g4_i1  |       | 0.26  | 1.14   | -1.95 | 0.00 |
| TRINITY_DN102347_c1_g1_i1  |       | 0.05  | 9.14   | -7.33 | 0.00 |
| TRINITY_DN102355_c4_g2_i3  | LCAP  | 1.69  | 4.44   | -1.40 | 0.00 |
| TRINITY_DN102360_c8_g3_i2  | TPM4  | 42.82 | 26.36  | 0.73  | 0.00 |
| TRINITY_DN102362_c1_g3_i3  |       | 0.32  | 6.52   | -4.14 | 0.00 |
| TRINITY_DN102362_c1_g5_i3  | OST4  | 0.00  | 14.41  | -7.90 | 0.00 |
| TRINITY_DN102372_c3_g3_i1  | TMC7  | 0.91  | 4.02   | -2.18 | 0.00 |
| TRINITY_DN102376_c2_g1_i1  |       | 0.73  | 0.03   | 4.36  | 0.00 |
| TRINITY_DN102376_c2_g3_i1  |       | 5.03  | 11.30  | -1.21 | 0.00 |
| TRINITY_DN102376_c2_g5_i1  |       | 1.08  | 15.27  | -3.78 | 0.00 |
| TRINITY_DN102379_c1_g2_i1  | T106B | 7.90  | 3.76   | 1.08  | 0.00 |
| TRINITY_DN102385_c9_g1_i4  | C4S2A | 19.20 | 33.85  | -0.83 | 0.00 |
| TRINITY_DN102389_c3_g5_i1  |       | 1.33  | 3.69   | -1.47 | 0.00 |
| TRINITY_DN102389_c3_g5_i2  |       | 52.03 | 148.23 | -1.44 | 0.00 |
| TRINITY_DN102391_c4_g1_i2  | MORC3 | 0.12  | 8.22   | -6.11 | 0.00 |
| TRINITY_DN102413_c1_g2_i7  | POLY  | 0.08  | 0.81   | -3.45 | 0.00 |
| TRINITY_DN102420_c0_g1_i7  | ANO8  | 0.12  | 1.69   | -3.80 | 0.00 |
| TRINITY_DN102427_c0_g1_i6  | FXC1A | 3.24  | 5.61   | -0.80 | 0.00 |
| TRINITY_DN102440_c1_g6_i10 | ABCB9 | 6.22  | 15.96  | -1.40 | 0.00 |
| TRINITY_DN102456_c6_g1_i2  |       | 0.22  | 2.76   | -3.44 | 0.00 |
| TRINITY_DN102456_c6_g2_i10 | AGRG7 | 0.00  | 1.66   | -4.84 | 0.00 |
| TRINITY_DN102458_c4_g1_i17 | DEN1B | 0.71  | 3.26   | -2.18 | 0.00 |
| TRINITY_DN102458_c4_g1_i18 | DEN1B | 0.25  | 1.22   | -2.38 | 0.00 |
| TRINITY_DN102468_c0_g3_i13 | RIPK2 | 3.38  | 6.89   | -1.04 | 0.00 |
| TRINITY_DN102485_c2_g1_i2  | CD3Z  | 7.74  | 20.37  | -1.43 | 0.00 |
| TRINITY_DN102496_c0_g2_i2  | DCSTP | 0.08  | 0.79   | -3.07 | 0.00 |
| TRINITY_DN102499_c0_g1_i5  |       | 0.00  | 0.96   | -5.95 | 0.00 |

|                            |       |       |       |       |      |
|----------------------------|-------|-------|-------|-------|------|
| TRINITY_DN102501_c1_g1_i5  | UB2G1 | 0.54  | 0.00  | 4.94  | 0.00 |
| TRINITY_DN102502_c2_g1_i7  | LEG9  | 5.24  | 14.49 | -1.50 | 0.00 |
| TRINITY_DN102505_c7_g1_i11 | LCP2  | 1.56  | 4.67  | -1.61 | 0.00 |
| TRINITY_DN102507_c0_g1_i1  |       | 1.73  | 64.25 | -4.95 | 0.00 |
| TRINITY_DN102512_c1_g2_i5  | PA24A | 0.00  | 0.57  | -5.01 | 0.00 |
| TRINITY_DN102515_c4_g2_i13 | PDLI7 | 0.00  | 1.81  | -5.12 | 0.00 |
| TRINITY_DN102527_c1_g1_i10 |       | 0.72  | 2.95  | -1.99 | 0.00 |
| TRINITY_DN102528_c2_g1_i2  | KANL1 | 0.26  | 1.87  | -2.76 | 0.00 |
| TRINITY_DN102536_c4_g1_i1  |       | 22.84 | 7.97  | 1.52  | 0.00 |
| TRINITY_DN102542_c12_g1_i2 | CYGB1 | 10.23 | 5.52  | 0.87  | 0.00 |
| TRINITY_DN102546_c5_g1_i1  |       | 17.45 | 9.87  | 0.86  | 0.00 |
| TRINITY_DN102555_c0_g1_i1  |       | 23.74 | 11.28 | 1.07  | 0.00 |
| TRINITY_DN102556_c0_g5_i3  |       | 1.51  | 4.44  | -1.57 | 0.00 |
| TRINITY_DN102559_c3_g3_i1  |       | 1.25  | 17.48 | -3.74 | 0.00 |
| TRINITY_DN102570_c2_g1_i11 | S39A7 | 0.65  | 1.58  | -8.01 | 0.00 |
| TRINITY_DN102590_c0_g1_i1  |       | 2.79  | 6.30  | -1.16 | 0.00 |
| TRINITY_DN102596_c5_g1_i2  | TDX   | 58.98 | 94.29 | -0.69 | 0.00 |
| TRINITY_DN102598_c2_g1_i1  |       | 0.53  | 2.01  | -1.93 | 0.00 |
| TRINITY_DN102610_c0_g2_i2  | DAB2  | 1.63  | 0.11  | 3.85  | 0.00 |
| TRINITY_DN102610_c0_g3_i1  | DAB2  | 4.75  | 2.02  | 1.26  | 0.00 |
| TRINITY_DN102616_c5_g3_i1  |       | 9.98  | 21.66 | -1.15 | 0.00 |
| TRINITY_DN102636_c0_g1_i1  |       | 0.24  | 3.25  | -3.49 | 0.00 |
| TRINITY_DN102642_c2_g3_i10 | IL2RB | 0.11  | 2.33  | -4.36 | 0.00 |
| TRINITY_DN102642_c2_g3_i8  | IL2RB | 0.23  | 2.01  | -3.00 | 0.00 |
| TRINITY_DN102667_c0_g1_i2  |       | 11.55 | 23.32 | -1.01 | 0.00 |
| TRINITY_DN102669_c5_g1_i12 | IKBZ  | 1.67  | 11.97 | -2.68 | 0.00 |
| TRINITY_DN102669_c5_g1_i13 | IKBZ  | 0.76  | 4.21  | -2.44 | 0.00 |
| TRINITY_DN102669_c5_g1_i15 | IKBZ  | 0.13  | 0.81  | -2.74 | 0.00 |
| TRINITY_DN102669_c5_g1_i19 | IKBZ  | 1.10  | 7.31  | -2.83 | 0.00 |
| TRINITY_DN102669_c5_g1_i7  | IKBZ  | 0.00  | 2.12  | -5.03 | 0.00 |
| TRINITY_DN102675_c5_g1_i4  |       | 0.37  | 6.19  | -3.59 | 0.00 |
| TRINITY_DN102678_c1_g1_i3  |       | 2.48  | 4.86  | -0.98 | 0.00 |
| TRINITY_DN102692_c1_g2_i2  |       | 0.74  | 0.00  | 5.67  | 0.00 |
| TRINITY_DN102704_c3_g2_i1  |       | 0.00  | 2.46  | -4.54 | 0.00 |
| TRINITY_DN102710_c6_g3_i1  |       | 1.46  | 10.23 | -2.79 | 0.00 |
| TRINITY_DN102717_c11_g1_i1 | CR1   | 21.26 | 10.54 | 1.05  | 0.00 |
| TRINITY_DN102724_c0_g1_i12 | IN35  | 6.21  | 12.45 | -1.03 | 0.00 |
| TRINITY_DN102724_c0_g1_i6  | IN35  | 2.01  | 6.17  | -1.59 | 0.00 |
| TRINITY_DN102730_c1_g1_i1  |       | 0.66  | 9.47  | -3.55 | 0.00 |
| TRINITY_DN102752_c4_g1_i3  |       | 1.20  | 19.63 | -3.96 | 0.00 |
| TRINITY_DN102762_c2_g2_i8  | PP4R1 | 0.02  | 1.26  | -5.90 | 0.00 |
| TRINITY_DN102816_c0_g2_i2  | LUM   | 60.00 | 31.46 | 0.94  | 0.00 |

|                            |       |         |         |        |      |
|----------------------------|-------|---------|---------|--------|------|
| TRINITY_DN102819_c5_g1_i14 | TRI39 | 57.53   | 104.98  | -0.92  | 0.00 |
| TRINITY_DN102819_c5_g1_i16 | TRI39 | 0.00    | 12.44   | -22.49 | 0.00 |
| TRINITY_DN102819_c5_g1_i6  |       | 0.10    | 1.41    | -3.56  | 0.00 |
| TRINITY_DN102822_c3_g1_i4  | ADRM1 | 0.00    | 0.70    | -4.52  | 0.00 |
| TRINITY_DN102842_c2_g1_i12 | MX    | 0.00    | 0.52    | -4.90  | 0.00 |
| TRINITY_DN102842_c2_g1_i17 | MX2   | 0.31    | 4.14    | -3.71  | 0.00 |
| TRINITY_DN102842_c2_g1_i19 | MX2   | 0.00    | 4.94    | -7.67  | 0.00 |
| TRINITY_DN102842_c2_g1_i5  | MX2   | 0.06    | 3.33    | -4.40  | 0.00 |
| TRINITY_DN102842_c2_g1_i6  | MX2   | 0.14    | 2.50    | -4.28  | 0.00 |
| TRINITY_DN102842_c2_g1_i8  | MX    | 0.02    | 0.89    | -5.00  | 0.00 |
| TRINITY_DN102852_c1_g3_i1  |       | 0.22    | 7.71    | -4.08  | 0.00 |
| TRINITY_DN102863_c3_g1_i4  |       | 13.90   | 41.17   | -1.56  | 0.00 |
| TRINITY_DN102863_c3_g1_i6  | LITAF | 13.31   | 27.16   | -1.07  | 0.00 |
| TRINITY_DN102864_c0_g1_i4  | ITB1A | 15.38   | 42.01   | -1.48  | 0.00 |
| TRINITY_DN102864_c0_g2_i6  | ITB5  | 1.47    | 0.73    | 1.04   | 0.00 |
| TRINITY_DN102866_c3_g3_i6  | FRIH  | 1989.08 | 1266.13 | 0.71   | 0.00 |
| TRINITY_DN102907_c0_g1_i4  |       | 0.00    | 1.74    | -4.54  | 0.00 |
| TRINITY_DN102921_c3_g1_i11 | COR1A | 12.53   | 36.23   | -1.51  | 0.00 |
| TRINITY_DN102921_c3_g1_i2  | COR1A | 10.34   | 38.97   | -1.92  | 0.00 |
| TRINITY_DN102921_c3_g1_i4  | COR1A | 7.04    | 15.56   | -1.12  | 0.00 |
| TRINITY_DN102937_c5_g2_i1  |       | 2.41    | 0.20    | 3.74   | 0.00 |
| TRINITY_DN102954_c2_g1_i2  | SC65  | 3.70    | 1.72    | 1.12   | 0.00 |
| TRINITY_DN102965_c8_g1_i1  |       | 3.10    | 7.68    | -1.35  | 0.00 |
| TRINITY_DN102965_c8_g2_i1  |       | 1.48    | 3.96    | -1.45  | 0.00 |
| TRINITY_DN102971_c1_g3_i1  |       | 2.43    | 7.28    | -1.60  | 0.00 |
| TRINITY_DN102974_c0_g1_i1  | AOXC  | 0.15    | 2.66    | -3.66  | 0.00 |
| TRINITY_DN102992_c2_g1_i1  | TP8L2 | 1.46    | 4.41    | -1.58  | 0.00 |
| TRINITY_DN102992_c2_g1_i4  | TP8L2 | 2.09    | 4.15    | -1.01  | 0.00 |
| TRINITY_DN103000_c4_g1_i1  | PSA2  | 63.74   | 110.96  | -0.80  | 0.00 |
| TRINITY_DN103025_c1_g1_i3  |       | 0.68    | 2.88    | -2.17  | 0.00 |
| TRINITY_DN103038_c0_g2_i2  | CHD2  | 0.33    | 2.85    | -3.16  | 0.00 |
| TRINITY_DN103048_c3_g1_i2  |       | 13.01   | 32.65   | -1.32  | 0.00 |
| TRINITY_DN103057_c1_g1_i3  |       | 1.16    | 10.23   | -3.13  | 0.00 |
| TRINITY_DN103060_c0_g1_i2  | CR3L2 | 0.00    | 0.68    | -5.53  | 0.00 |
| TRINITY_DN103065_c7_g1_i1  | F213A | 2.84    | 0.76    | 1.99   | 0.00 |
| TRINITY_DN103098_c0_g1_i1  | DHE3  | 15.71   | 8.02    | 0.95   | 0.00 |
| TRINITY_DN103098_c0_g2_i2  |       | 0.00    | 10.30   | -23.70 | 0.00 |
| TRINITY_DN103099_c8_g1_i2  |       | 0.86    | 9.48    | -3.17  | 0.00 |
| TRINITY_DN103102_c5_g1_i2  |       | 4.40    | 20.03   | -2.11  | 0.00 |
| TRINITY_DN103110_c4_g1_i5  |       | 0.60    | 7.93    | -3.55  | 0.00 |
| TRINITY_DN103113_c1_g1_i11 | RN121 | 3.54    | 0.61    | 2.60   | 0.00 |
| TRINITY_DN103113_c1_g1_i14 | RN121 | 0.03    | 0.51    | -3.98  | 0.00 |

|                            |       |       |        |       |      |
|----------------------------|-------|-------|--------|-------|------|
| TRINITY_DN103113_c1_g1_i15 | RN121 | 0.04  | 0.57   | -3.71 | 0.00 |
| TRINITY_DN103116_c0_g1_i1  | NEMF  | 0.00  | 1.30   | -6.69 | 0.00 |
| TRINITY_DN103118_c3_g1_i4  | SAT1  | 0.92  | 7.65   | -2.95 | 0.00 |
| TRINITY_DN103118_c3_g3_i1  |       | 88.75 | 145.34 | -0.71 | 0.00 |
| TRINITY_DN103126_c4_g1_i1  |       | 8.93  | 44.15  | -2.35 | 0.00 |
| TRINITY_DN103126_c4_g6_i1  |       | 34.52 | 16.78  | 1.04  | 0.00 |
| TRINITY_DN103175_c6_g1_i3  | P2RY8 | 0.47  | 1.50   | -1.62 | 0.00 |
| TRINITY_DN103186_c6_g2_i1  |       | 5.79  | 16.12  | -1.48 | 0.00 |
| TRINITY_DN103192_c2_g1_i1  |       | 0.29  | 2.90   | -3.67 | 0.00 |
| TRINITY_DN103193_c2_g1_i2  |       | 1.59  | 5.44   | -1.77 | 0.00 |
| TRINITY_DN103203_c1_g1_i7  | NFS1  | 31.57 | 22.13  | 0.50  | 0.00 |
| TRINITY_DN103207_c5_g1_i2  | EIF3B | 5.72  | 0.00   | 6.95  | 0.00 |
| TRINITY_DN103212_c0_g1_i9  | FLT3  | 0.28  | 3.59   | -3.69 | 0.00 |
| TRINITY_DN103219_c0_g1_i1  | FKB10 | 8.19  | 2.74   | 1.58  | 0.00 |
| TRINITY_DN103219_c0_g1_i2  | FKB10 | 4.10  | 1.58   | 1.39  | 0.00 |
| TRINITY_DN103219_c0_g1_i3  | FKB10 | 23.08 | 15.23  | 0.58  | 0.00 |
| TRINITY_DN103233_c4_g1_i4  | UBP21 | 0.07  | 1.75   | -3.98 | 0.00 |
| TRINITY_DN103236_c0_g1_i3  | CD6   | 0.00  | 0.63   | -5.17 | 0.00 |
| TRINITY_DN103236_c0_g1_i4  | CD6   | 0.02  | 0.70   | -4.96 | 0.00 |
| TRINITY_DN103236_c0_g1_i7  | CD6   | 0.02  | 1.30   | -5.58 | 0.00 |
| TRINITY_DN103236_c0_g1_i9  | CD6   | 0.42  | 1.79   | -2.10 | 0.00 |
| TRINITY_DN103236_c0_g3_i1  | C163A | 0.96  | 8.10   | -2.90 | 0.00 |
| TRINITY_DN103239_c2_g1_i15 | ENDD1 | 0.06  | 2.24   | -3.64 | 0.00 |
| TRINITY_DN103239_c2_g1_i17 | ENDD1 | 0.65  | 25.88  | -5.44 | 0.00 |
| TRINITY_DN103240_c0_g1_i11 | MUC2L | 0.05  | 5.49   | -6.55 | 0.00 |
| TRINITY_DN103240_c0_g1_i13 | MUC2L | 13.94 | 0.20   | 6.12  | 0.00 |
| TRINITY_DN103240_c0_g1_i16 | MUC2L | 12.45 | 0.52   | 4.58  | 0.00 |
| TRINITY_DN103240_c0_g1_i18 | MUC2  | 2.98  | 123.37 | -5.38 | 0.00 |
| TRINITY_DN103240_c0_g1_i7  | MUC5A | 0.00  | 2.37   | -7.13 | 0.00 |
| TRINITY_DN103250_c1_g1_i22 | CNOT2 | 0.35  | 0.00   | 4.99  | 0.00 |
| TRINITY_DN103252_c13_g1_i1 | C3AR  | 0.19  | 1.78   | -3.30 | 0.00 |
| TRINITY_DN103256_c3_g1_i2  | SE1BA | 0.00  | 1.56   | -6.36 | 0.00 |
| TRINITY_DN103280_c1_g2_i3  | CYAA  | 1.32  | 6.17   | -2.24 | 0.00 |
| TRINITY_DN103285_c0_g1_i6  | BORG5 | 1.21  | 0.40   | 1.55  | 0.00 |
| TRINITY_DN103290_c2_g1_i1  | RFXAP | 0.00  | 1.49   | -5.13 | 0.00 |
| TRINITY_DN103291_c11_g2_i1 |       | 1.02  | 4.32   | -2.10 | 0.00 |
| TRINITY_DN103302_c2_g2_i2  | NCF1  | 2.74  | 10.14  | -1.95 | 0.00 |
| TRINITY_DN103302_c2_g5_i2  | NCF1  | 0.47  | 1.64   | -1.95 | 0.00 |
| TRINITY_DN103304_c8_g1_i1  | TC1A  | 0.38  | 3.60   | -3.04 | 0.00 |
| TRINITY_DN103325_c0_g1_i1  |       | 3.93  | 2.38   | 0.72  | 0.00 |
| TRINITY_DN103335_c1_g1_i16 |       | 0.23  | 1.94   | -3.22 | 0.00 |
| TRINITY_DN103343_c1_g2_i5  | WLS   | 13.55 | 8.08   | 0.73  | 0.00 |



|                            |       |        |        |       |      |
|----------------------------|-------|--------|--------|-------|------|
| TRINITY_DN103349_c0_g1_i2  | CRLD2 | 3.06   | 1.37   | 1.13  | 0.00 |
| TRINITY_DN103349_c0_g1_i4  | CRLD2 | 2.68   | 1.48   | 0.86  | 0.00 |
| TRINITY_DN103351_c7_g1_i2  | GIMA4 | 0.12   | 5.18   | -5.65 | 0.00 |
| TRINITY_DN103353_c10_g1_i1 | PTN18 | 3.08   | 7.37   | -1.30 | 0.00 |
| TRINITY_DN103359_c0_g1_i2  | IRF8  | 2.57   | 5.59   | -1.15 | 0.00 |
| TRINITY_DN103378_c2_g3_i3  |       | 0.19   | 1.63   | -3.18 | 0.00 |
| TRINITY_DN103378_c2_g4_i5  | NF7O  | 0.06   | 4.49   | -4.32 | 0.00 |
| TRINITY_DN103381_c0_g3_i1  |       | 1.34   | 4.19   | -1.63 | 0.00 |
| TRINITY_DN103383_c4_g1_i2  | TAGL  | 146.03 | 69.31  | 1.08  | 0.00 |
| TRINITY_DN103408_c2_g2_i1  | GVIN1 | 0.01   | 1.62   | -6.42 | 0.00 |
| TRINITY_DN103408_c2_g2_i6  | GVIN1 | 0.00   | 9.73   | -9.31 | 0.00 |
| TRINITY_DN103416_c0_g1_i3  | MSMB  | 7.84   | 12.98  | -0.76 | 0.00 |
| TRINITY_DN103425_c4_g1_i1  | IL7RA | 0.22   | 4.25   | -4.26 | 0.00 |
| TRINITY_DN103425_c4_g1_i5  | IL7RA | 0.00   | 0.57   | -5.04 | 0.00 |
| TRINITY_DN103425_c4_g1_i7  | IL7RA | 2.37   | 6.15   | -1.42 | 0.00 |
| TRINITY_DN103435_c1_g1_i1  |       | 203.74 | 782.13 | -1.97 | 0.00 |
| TRINITY_DN103435_c1_g2_i4  | HG2A  | 0.09   | 46.16  | -9.09 | 0.00 |
| TRINITY_DN103435_c1_g2_i5  | HG2A  | 336.34 | 885.00 | -1.36 | 0.00 |
| TRINITY_DN103435_c1_g2_i7  | HG2A  | 0.00   | 1.40   | -6.07 | 0.00 |
| TRINITY_DN103435_c1_g3_i1  |       | 0.00   | 13.29  | -4.80 | 0.00 |
| TRINITY_DN103435_c1_g6_i1  |       | 0.51   | 7.08   | -3.89 | 0.00 |
| TRINITY_DN103435_c1_g8_i2  | HG2A  | 15.71  | 57.46  | -1.88 | 0.00 |
| TRINITY_DN103439_c5_g1_i1  |       | 3.83   | 32.03  | -3.13 | 0.00 |
| TRINITY_DN103442_c0_g1_i1  | BICL1 | 0.86   | 2.00   | -1.21 | 0.00 |
| TRINITY_DN103446_c0_g1_i8  | RAB5A | 0.00   | 0.80   | -4.33 | 0.00 |
| TRINITY_DN103447_c1_g2_i4  |       | 0.11   | 2.17   | -4.00 | 0.00 |
| TRINITY_DN103448_c5_g1_i2  |       | 1.05   | 0.33   | 1.68  | 0.00 |
| TRINITY_DN103448_c6_g2_i3  | ARH40 | 0.42   | 0.05   | 2.83  | 0.00 |
| TRINITY_DN103452_c3_g7_i1  |       | 0.12   | 0.99   | -3.32 | 0.00 |
| TRINITY_DN103453_c6_g3_i1  |       | 0.18   | 2.95   | -3.46 | 0.00 |
| TRINITY_DN103461_c8_g2_i2  | STAG2 | 1.83   | 0.02   | 6.65  | 0.00 |
| TRINITY_DN103471_c10_g2_i1 |       | 2.79   | 7.99   | -1.48 | 0.00 |
| TRINITY_DN103478_c6_g1_i1  |       | 5.47   | 13.90  | -1.35 | 0.00 |
| TRINITY_DN103478_c6_g2_i1  |       | 4.32   | 8.77   | -1.02 | 0.00 |
| TRINITY_DN103488_c3_g1_i2  |       | 0.48   | 1.19   | -1.30 | 0.00 |
| TRINITY_DN103491_c4_g1_i1  | AGRG4 | 2.22   | 17.51  | -2.97 | 0.00 |
| TRINITY_DN103491_c4_g1_i2  | AGRG2 | 0.00   | 1.23   | -4.91 | 0.00 |
| TRINITY_DN103491_c7_g1_i1  | AGRG6 | 1.26   | 15.17  | -3.35 | 0.00 |
| TRINITY_DN103503_c1_g1_i1  | I17RE | 0.41   | 2.14   | -2.43 | 0.00 |
| TRINITY_DN103503_c1_g2_i1  |       | 0.84   | 6.57   | -2.91 | 0.00 |
| TRINITY_DN103503_c1_g3_i1  |       | 0.54   | 9.35   | -3.67 | 0.00 |
| TRINITY_DN103513_c0_g1_i5  | LOX5  | 1.65   | 7.02   | -2.07 | 0.00 |

|                            |       |        |        |        |      |
|----------------------------|-------|--------|--------|--------|------|
| TRINITY_DN103513_c0_g1_i7  | LOX5  | 0.17   | 2.72   | -3.91  | 0.00 |
| TRINITY_DN103513_c0_g4_i1  | LOX5  | 3.48   | 28.36  | -2.84  | 0.00 |
| TRINITY_DN103517_c2_g1_i1  | HBB1  | 146.47 | 26.67  | 2.74   | 0.00 |
| TRINITY_DN103517_c2_g1_i2  | HBB1  | 62.94  | 6.05   | 3.66   | 0.00 |
| TRINITY_DN103526_c3_g1_i1  |       | 7.86   | 15.72  | -1.01  | 0.00 |
| TRINITY_DN103533_c7_g1_i1  |       | 16.31  | 101.94 | -2.70  | 0.00 |
| TRINITY_DN103534_c4_g1_i8  | ACAP2 | 0.85   | 2.88   | -1.85  | 0.00 |
| TRINITY_DN103540_c10_g1_i3 |       | 3.59   | 27.25  | -3.10  | 0.00 |
| TRINITY_DN103541_c1_g1_i1  |       | 0.41   | 1.76   | -2.11  | 0.00 |
| TRINITY_DN103541_c4_g4_i1  |       | 21.24  | 48.94  | -1.21  | 0.00 |
| TRINITY_DN103543_c0_g1_i2  | LRMP  | 1.33   | 3.12   | -1.23  | 0.00 |
| TRINITY_DN103547_c2_g1_i17 |       | 6.54   | 0.00   | 5.40   | 0.00 |
| TRINITY_DN103547_c2_g1_i20 |       | 4.55   | 19.05  | -2.22  | 0.00 |
| TRINITY_DN103553_c0_g1_i2  | CCR9  | 1.57   | 3.90   | -1.33  | 0.00 |
| TRINITY_DN103555_c0_g2_i7  | NSD2  | 0.00   | 0.39   | -4.62  | 0.00 |
| TRINITY_DN103561_c10_g1_i6 | TNR5  | 0.00   | 2.88   | -6.40  | 0.00 |
| TRINITY_DN103569_c0_g2_i1  | GPR25 | 0.42   | 2.93   | -2.83  | 0.00 |
| TRINITY_DN103586_c0_g1_i7  | R213A | 2.65   | 6.44   | -1.29  | 0.00 |
| TRINITY_DN103598_c5_g2_i1  |       | 7.06   | 1.64   | 2.13   | 0.00 |
| TRINITY_DN103608_c6_g1_i1  | LORF2 | 0.00   | 2.79   | -23.16 | 0.00 |
| TRINITY_DN103608_c6_g1_i5  | LORF2 | 0.00   | 1.42   | -22.20 | 0.00 |
| TRINITY_DN103608_c6_g1_i6  | LORF2 | 0.00   | 1.41   | -22.20 | 0.00 |
| TRINITY_DN103616_c0_g3_i5  | CCL19 | 1.00   | 15.03  | -3.91  | 0.00 |
| TRINITY_DN103620_c0_g1_i3  | SAMD9 | 0.01   | 0.60   | -5.88  | 0.00 |
| TRINITY_DN103647_c0_g2_i1  |       | 5.76   | 0.00   | 4.72   | 0.00 |
| TRINITY_DN103654_c0_g1_i1  | CCD80 | 3.37   | 1.31   | 1.42   | 0.00 |
| TRINITY_DN103656_c2_g1_i4  | RAB6A | 1.49   | 0.15   | 3.24   | 0.00 |
| TRINITY_DN103666_c3_g1_i2  | HCK   | 0.67   | 2.71   | -1.99  | 0.00 |
| TRINITY_DN103666_c3_g1_i3  | HCK   | 7.59   | 30.25  | -2.05  | 0.00 |
| TRINITY_DN103666_c3_g2_i3  | HCK   | 2.32   | 19.11  | -3.17  | 0.00 |
| TRINITY_DN103672_c2_g1_i10 | PAXI  | 1.85   | 0.15   | 3.73   | 0.00 |
| TRINITY_DN103673_c5_g1_i1  |       | 0.92   | 5.43   | -2.64  | 0.00 |
| TRINITY_DN103682_c1_g1_i6  | PDPR  | 0.88   | 0.01   | 5.79   | 0.00 |
| TRINITY_DN103684_c1_g1_i1  | SEPT6 | 1.45   | 5.69   | -1.91  | 0.00 |
| TRINITY_DN103688_c3_g1_i1  | AKA12 | 0.00   | 1.24   | -7.06  | 0.00 |
| TRINITY_DN103717_c0_g1_i1  | CAD11 | 7.03   | 1.88   | 1.91   | 0.00 |
| TRINITY_DN103717_c2_g2_i4  | TOX2  | 0.04   | 1.29   | -4.60  | 0.00 |
| TRINITY_DN103727_c3_g1_i2  |       | 13.51  | 0.48   | 4.96   | 0.00 |
| TRINITY_DN103729_c0_g1_i1  |       | 1.49   | 17.66  | -3.56  | 0.00 |
| TRINITY_DN103729_c0_g1_i13 |       | 0.08   | 4.15   | -4.16  | 0.00 |
| TRINITY_DN103729_c0_g1_i18 |       | 0.09   | 1.35   | -3.84  | 0.00 |
| TRINITY_DN103729_c0_g1_i3  |       | 0.00   | 2.88   | -4.27  | 0.00 |

|                            |       |       |       |       |      |
|----------------------------|-------|-------|-------|-------|------|
| TRINITY_DN103729_c0_g1_i7  |       | 0.00  | 4.23  | -5.49 | 0.00 |
| TRINITY_DN103729_c0_g1_i8  |       | 0.15  | 3.13  | -4.64 | 0.00 |
| TRINITY_DN103729_c0_g1_i9  |       | 0.23  | 3.19  | -3.71 | 0.00 |
| TRINITY_DN103740_c6_g1_i1  |       | 6.09  | 19.96 | -1.72 | 0.00 |
| TRINITY_DN103758_c0_g1_i3  | SAP   | 13.85 | 46.50 | -1.76 | 0.00 |
| TRINITY_DN103763_c1_g1_i6  | GHR   | 8.03  | 4.94  | 0.67  | 0.00 |
| TRINITY_DN103763_c1_g1_i9  | GHR   | 5.67  | 1.87  | 1.61  | 0.00 |
| TRINITY_DN103785_c6_g1_i3  |       | 0.79  | 3.34  | -2.09 | 0.00 |
| TRINITY_DN103792_c1_g1_i18 | AGRG5 | 2.79  | 9.00  | -1.67 | 0.00 |
| TRINITY_DN103818_c3_g1_i1  |       | 5.39  | 2.46  | 1.15  | 0.00 |
| TRINITY_DN103818_c4_g1_i2  | XCR1  | 3.19  | 9.15  | -1.53 | 0.00 |
| TRINITY_DN103819_c0_g2_i2  | GDIR2 | 11.78 | 31.50 | -1.42 | 0.00 |
| TRINITY_DN103822_c0_g1_i7  | SC24A | 0.05  | 0.90  | -4.33 | 0.00 |
| TRINITY_DN103823_c1_g2_i5  | PKHG7 | 0.54  | 2.33  | -2.12 | 0.00 |
| TRINITY_DN103843_c1_g2_i2  |       | 8.74  | 1.94  | 2.21  | 0.00 |
| TRINITY_DN103849_c1_g2_i1  | GNAQ  | 0.03  | 1.04  | -4.45 | 0.00 |
| TRINITY_DN103858_c2_g1_i5  | G6PD  | 3.58  | 10.05 | -1.53 | 0.00 |
| TRINITY_DN103866_c3_g2_i2  | YTX2  | 0.39  | 2.12  | -2.47 | 0.00 |
| TRINITY_DN103885_c0_g2_i9  |       | 1.90  | 0.21  | 3.17  | 0.00 |
| TRINITY_DN103893_c0_g1_i6  |       | 0.14  | 6.79  | -5.30 | 0.00 |
| TRINITY_DN103894_c0_g1_i2  | AT2A3 | 7.46  | 17.17 | -1.24 | 0.00 |
| TRINITY_DN103898_c2_g1_i2  | FA49A | 7.23  | 15.31 | -1.12 | 0.00 |
| TRINITY_DN103899_c0_g3_i3  | SYNE1 | 0.09  | 1.06  | -3.53 | 0.00 |
| TRINITY_DN103904_c4_g1_i1  | DNJA2 | 2.53  | 0.00  | 7.32  | 0.00 |
| TRINITY_DN103904_c5_g1_i10 |       | 1.49  | 18.69 | -3.65 | 0.00 |
| TRINITY_DN103905_c1_g4_i2  | ZC12B | 0.07  | 1.04  | -3.28 | 0.00 |
| TRINITY_DN103926_c2_g1_i1  |       | 6.30  | 2.88  | 1.14  | 0.00 |
| TRINITY_DN103948_c3_g1_i3  | VWA7  | 0.45  | 10.55 | -4.48 | 0.00 |
| TRINITY_DN103948_c3_g1_i7  | VWA7  | 0.02  | 0.92  | -5.11 | 0.00 |
| TRINITY_DN103948_c3_g3_i1  |       | 16.71 | 6.02  | 1.47  | 0.00 |
| TRINITY_DN103949_c4_g3_i1  | DCR1A | 1.24  | 3.63  | -1.54 | 0.00 |
| TRINITY_DN103959_c5_g2_i1  | BTLA  | 0.02  | 0.64  | -3.76 | 0.00 |
| TRINITY_DN103990_c2_g1_i4  | GRM1C | 1.50  | 4.58  | -1.58 | 0.00 |
| TRINITY_DN103990_c2_g2_i7  | GRM1C | 0.19  | 1.48  | -3.03 | 0.00 |
| TRINITY_DN104006_c3_g1_i1  |       | 5.52  | 0.32  | 3.79  | 0.00 |
| TRINITY_DN104006_c6_g1_i1  |       | 0.42  | 4.55  | -3.46 | 0.00 |
| TRINITY_DN104009_c1_g2_i2  | TRI66 | 0.43  | 2.43  | -2.48 | 0.00 |
| TRINITY_DN104009_c1_g2_i3  | TRI66 | 0.51  | 1.92  | -1.90 | 0.00 |
| TRINITY_DN104015_c1_g1_i1  |       | 31.09 | 13.33 | 1.20  | 0.00 |
| TRINITY_DN104043_c14_g1_i1 |       | 3.00  | 0.28  | 3.03  | 0.00 |
| TRINITY_DN104062_c0_g1_i1  |       | 0.79  | 10.72 | -3.80 | 0.00 |
| TRINITY_DN104062_c1_g1_i12 |       | 0.04  | 1.07  | -3.70 | 0.00 |

|                            |       |        |       |       |      |
|----------------------------|-------|--------|-------|-------|------|
| TRINITY_DN104062_c1_g1_i6  |       | 1.61   | 5.25  | -1.73 | 0.00 |
| TRINITY_DN104062_c2_g1_i3  |       | 6.81   | 2.73  | 1.37  | 0.00 |
| TRINITY_DN104064_c0_g1_i11 | ITB2  | 0.40   | 7.43  | -4.23 | 0.00 |
| TRINITY_DN104064_c0_g1_i7  | ITB2  | 3.59   | 8.28  | -1.21 | 0.00 |
| TRINITY_DN104072_c0_g2_i6  | CASPC | 0.00   | 1.02  | -4.93 | 0.00 |
| TRINITY_DN104079_c7_g2_i1  |       | 5.47   | 14.15 | -1.39 | 0.00 |
| TRINITY_DN104079_c8_g3_i1  |       | 55.45  | 25.90 | 1.14  | 0.00 |
| TRINITY_DN104086_c1_g6_i1  |       | 1.39   | 31.98 | -4.38 | 0.00 |
| TRINITY_DN104092_c1_g1_i2  | SRRM1 | 0.78   | 0.14  | 2.67  | 0.00 |
| TRINITY_DN104095_c7_g2_i2  | NCF4  | 1.91   | 4.98  | -1.38 | 0.00 |
| TRINITY_DN104111_c0_g1_i1  | PLK3  | 0.57   | 1.83  | -1.69 | 0.00 |
| TRINITY_DN104111_c0_g1_i3  | PLK3  | 1.79   | 4.26  | -1.28 | 0.00 |
| TRINITY_DN104121_c0_g1_i9  |       | 0.79   | 0.01  | 5.80  | 0.00 |
| TRINITY_DN104123_c2_g3_i3  | TBA3  | 1.22   | 27.04 | -4.47 | 0.00 |
| TRINITY_DN104131_c1_g3_i1  |       | 1.59   | 4.50  | -1.52 | 0.00 |
| TRINITY_DN104136_c1_g1_i8  | DHX58 | 0.03   | 0.58  | -4.32 | 0.00 |
| TRINITY_DN104152_c0_g1_i6  | PPGB  | 9.04   | 16.81 | -0.91 | 0.00 |
| TRINITY_DN104156_c6_g2_i2  |       | 2.90   | 12.15 | -2.13 | 0.00 |
| TRINITY_DN104156_c6_g2_i3  |       | 0.04   | 2.32  | -5.33 | 0.00 |
| TRINITY_DN104156_c6_g6_i1  |       | 19.03  | 52.73 | -1.46 | 0.00 |
| TRINITY_DN104169_c10_g1_i1 |       | 0.12   | 1.94  | -4.07 | 0.00 |
| TRINITY_DN104177_c2_g4_i1  | FGFP1 | 5.83   | 2.35  | 1.36  | 0.00 |
| TRINITY_DN104191_c7_g1_i2  | PARD3 | 0.90   | 0.07  | 3.52  | 0.00 |
| TRINITY_DN104195_c1_g8_i1  | UBP33 | 1.85   | 9.37  | -2.26 | 0.00 |
| TRINITY_DN104210_c0_g2_i1  | CSCL1 | 0.00   | 1.71  | -7.34 | 0.00 |
| TRINITY_DN104231_c8_g3_i1  |       | 2.44   | 19.33 | -2.98 | 0.00 |
| TRINITY_DN104234_c3_g1_i2  | CHD2  | 6.01   | 0.00  | 5.18  | 0.00 |
| TRINITY_DN104236_c2_g1_i10 | MALD2 | 0.97   | 0.00  | 6.46  | 0.00 |
| TRINITY_DN104240_c1_g1_i10 | CCNG1 | 0.00   | 1.01  | -5.16 | 0.00 |
| TRINITY_DN104269_c4_g1_i2  | I10R1 | 0.20   | 1.50  | -2.92 | 0.00 |
| TRINITY_DN104269_c4_g1_i4  | I10R1 | 0.53   | 2.79  | -2.40 | 0.00 |
| TRINITY_DN104278_c2_g1_i1  | BGH3  | 8.90   | 4.58  | 0.94  | 0.00 |
| TRINITY_DN104300_c8_g3_i1  |       | 1.82   | 4.08  | -1.18 | 0.00 |
| TRINITY_DN104320_c7_g3_i2  |       | 1.59   | 4.63  | -1.57 | 0.00 |
| TRINITY_DN104327_c0_g1_i16 | HIPK3 | 0.03   | 0.78  | -5.34 | 0.00 |
| TRINITY_DN104341_c3_g1_i4  | LKHA4 | 1.52   | 3.83  | -1.35 | 0.00 |
| TRINITY_DN104342_c0_g1_i11 | SETVS | 17.62  | 46.52 | -1.37 | 0.00 |
| TRINITY_DN104342_c0_g1_i31 | CY24B | 0.03   | 0.71  | -3.86 | 0.00 |
| TRINITY_DN104351_c1_g2_i7  | K1C13 | 104.35 | 18.09 | 2.56  | 0.00 |
| TRINITY_DN104413_c3_g1_i1  | RN138 | 0.44   | 3.72  | -3.12 | 0.00 |
| TRINITY_DN104413_c3_g1_i2  | RN138 | 0.27   | 3.69  | -3.73 | 0.00 |
| TRINITY_DN104419_c1_g1_i9  | CO9A3 | 2.49   | 0.46  | 2.36  | 0.00 |

|                            |       |        |        |       |      |
|----------------------------|-------|--------|--------|-------|------|
| TRINITY_DN104439_c4_g1_i1  |       | 0.21   | 1.04   | -2.32 | 0.00 |
| TRINITY_DN104443_c1_g1_i3  | LY75  | 0.12   | 1.68   | -3.63 | 0.00 |
| TRINITY_DN104451_c1_g1_i9  | DYN2  | 0.00   | 0.60   | -4.79 | 0.00 |
| TRINITY_DN104460_c1_g3_i1  | K1C13 | 176.33 | 66.11  | 1.42  | 0.00 |
| TRINITY_DN104460_c1_g3_i2  | K1C13 | 63.33  | 12.83  | 2.36  | 0.00 |
| TRINITY_DN104460_c1_g3_i7  | K1C13 | 111.12 | 44.97  | 1.41  | 0.00 |
| TRINITY_DN104463_c0_g3_i1  |       | 1.75   | 6.79   | -1.88 | 0.00 |
| TRINITY_DN104468_c12_g4_i1 |       | 0.97   | 7.69   | -3.02 | 0.00 |
| TRINITY_DN104468_c13_g2_i1 |       | 10.08  | 5.59   | 0.86  | 0.00 |
| TRINITY_DN104474_c2_g1_i5  | GBP1  | 4.58   | 17.39  | -1.95 | 0.00 |
| TRINITY_DN104474_c2_g2_i4  | GBP1  | 5.60   | 19.59  | -1.79 | 0.00 |
| TRINITY_DN104474_c2_g2_i7  | GBP1  | 0.56   | 8.72   | -3.90 | 0.00 |
| TRINITY_DN104474_c2_g2_i9  | GBP1  | 2.46   | 14.87  | -2.62 | 0.00 |
| TRINITY_DN104474_c2_g3_i12 | GBP1  | 1.36   | 9.95   | -2.86 | 0.00 |
| TRINITY_DN104474_c2_g3_i3  | GBP1  | 4.05   | 15.92  | -1.95 | 0.00 |
| TRINITY_DN104474_c2_g3_i9  | GBP1  | 2.04   | 5.80   | -1.51 | 0.00 |
| TRINITY_DN104475_c2_g1_i11 | HECA2 | 2.22   | 7.96   | -1.83 | 0.00 |
| TRINITY_DN104481_c6_g1_i5  | ZN366 | 0.91   | 1.93   | -1.11 | 0.00 |
| TRINITY_DN104487_c4_g1_i8  | B3AT  | 0.16   | 4.54   | -4.78 | 0.00 |
| TRINITY_DN104517_c0_g1_i4  | CO3   | 1.88   | 0.04   | 5.81  | 0.00 |
| TRINITY_DN104519_c1_g8_i1  |       | 0.29   | 3.66   | -3.79 | 0.00 |
| TRINITY_DN104546_c4_g1_i9  | ARF4  | 7.09   | 0.00   | 7.21  | 0.00 |
| TRINITY_DN104553_c7_g2_i3  | CATH  | 52.84  | 124.80 | -1.23 | 0.00 |
| TRINITY_DN104557_c2_g1_i1  | FMNL1 | 1.67   | 4.57   | -1.47 | 0.00 |
| TRINITY_DN104562_c1_g3_i1  | SRC8  | 0.16   | 12.11  | -5.90 | 0.00 |
| TRINITY_DN104562_c1_g3_i5  | SRC8  | 1.83   | 0.25   | 2.82  | 0.00 |
| TRINITY_DN104562_c1_g3_i7  | SRC8  | 0.00   | 4.19   | -7.72 | 0.00 |
| TRINITY_DN104569_c3_g1_i2  | LAMB4 | 5.92   | 2.40   | 1.33  | 0.00 |
| TRINITY_DN104574_c3_g3_i1  | IL21R | 0.00   | 0.66   | -5.12 | 0.00 |
| TRINITY_DN104574_c3_g3_i2  | IL21R | 0.12   | 0.88   | -2.91 | 0.00 |
| TRINITY_DN104574_c3_g3_i3  | IL21R | 0.14   | 1.63   | -3.49 | 0.00 |
| TRINITY_DN104574_c3_g3_i4  | IL21R | 0.00   | 1.25   | -6.34 | 0.00 |
| TRINITY_DN104578_c1_g2_i2  | HMCN2 | 1.23   | 3.93   | -1.76 | 0.00 |
| TRINITY_DN104581_c5_g1_i10 | CD276 | 0.16   | 1.14   | -2.93 | 0.00 |
| TRINITY_DN104585_c1_g1_i13 | MBP   | 6.13   | 2.80   | 1.11  | 0.00 |
| TRINITY_DN104587_c8_g1_i2  | CCR5  | 0.71   | 2.17   | -1.68 | 0.00 |
| TRINITY_DN104587_c8_g1_i4  | CCR5  | 0.17   | 3.87   | -4.52 | 0.00 |
| TRINITY_DN104588_c4_g1_i10 |       | 0.11   | 5.57   | -5.07 | 0.00 |
| TRINITY_DN104588_c4_g1_i4  | AGRF3 | 0.33   | 3.05   | -3.15 | 0.00 |
| TRINITY_DN104588_c4_g2_i1  |       | 0.12   | 1.45   | -3.03 | 0.00 |
| TRINITY_DN104601_c3_g1_i10 |       | 14.90  | 34.44  | -1.23 | 0.00 |
| TRINITY_DN104604_c4_g1_i8  |       | 0.00   | 0.96   | -4.83 | 0.00 |

|                            |       |        |        |       |      |
|----------------------------|-------|--------|--------|-------|------|
| TRINITY_DN104604_c5_g1_i4  |       | 1.29   | 8.23   | -2.63 | 0.00 |
| TRINITY_DN104633_c1_g1_i4  |       | 0.23   | 15.71  | -5.41 | 0.00 |
| TRINITY_DN104633_c1_g9_i1  |       | 0.00   | 12.19  | -4.56 | 0.00 |
| TRINITY_DN104634_c2_g2_i3  |       | 16.37  | 4.09   | 2.05  | 0.00 |
| TRINITY_DN104641_c3_g5_i1  |       | 3.04   | 10.99  | -1.90 | 0.00 |
| TRINITY_DN104644_c2_g1_i4  | ANXA4 | 16.27  | 8.02   | 0.99  | 0.00 |
| TRINITY_DN104660_c0_g2_i1  | HS90B | 368.01 | 644.00 | -0.81 | 0.00 |
| TRINITY_DN104678_c5_g6_i1  |       | 0.27   | 11.46  | -4.65 | 0.00 |
| TRINITY_DN104685_c1_g1_i10 | K1468 | 0.19   | 1.23   | -2.68 | 0.00 |
| TRINITY_DN104690_c5_g2_i1  |       | 2.36   | 7.59   | -1.67 | 0.00 |
| TRINITY_DN104691_c2_g2_i2  | PLCL2 | 0.59   | 2.42   | -2.00 | 0.00 |
| TRINITY_DN104691_c3_g4_i1  | PLCL2 | 0.57   | 1.63   | -1.57 | 0.00 |
| TRINITY_DN104698_c3_g2_i3  | GPC1  | 4.13   | 2.20   | 0.91  | 0.00 |
| TRINITY_DN104715_c6_g2_i1  |       | 2.04   | 0.23   | 3.32  | 0.00 |
| TRINITY_DN104722_c13_g1_i2 |       | 0.17   | 2.52   | -3.52 | 0.00 |
| TRINITY_DN104733_c2_g1_i1  | AMFR  | 1.21   | 0.00   | 6.88  | 0.00 |
| TRINITY_DN104735_c0_g2_i1  | PTPRZ | 1.42   | 0.50   | 1.52  | 0.00 |
| TRINITY_DN104745_c3_g1_i1  |       | 0.56   | 2.09   | -1.94 | 0.00 |
| TRINITY_DN104753_c6_g1_i1  |       | 3.18   | 19.35  | -2.68 | 0.00 |
| TRINITY_DN104761_c1_g1_i3  | MUCM  | 1.52   | 10.82  | -2.96 | 0.00 |
| TRINITY_DN104761_c1_g1_i5  | IGHM  | 1.98   | 19.18  | -3.30 | 0.00 |
| TRINITY_DN104761_c1_g5_i2  | HV103 | 0.00   | 3.63   | -4.13 | 0.00 |
| TRINITY_DN104766_c7_g1_i1  |       | 22.69  | 12.58  | 0.82  | 0.00 |
| TRINITY_DN104769_c6_g2_i1  | IFIT5 | 0.16   | 1.96   | -3.33 | 0.00 |
| TRINITY_DN104776_c1_g2_i1  | GBP1  | 3.48   | 14.96  | -2.12 | 0.00 |
| TRINITY_DN104776_c1_g3_i1  | GBP1  | 0.29   | 3.25   | -3.53 | 0.00 |
| TRINITY_DN104789_c1_g1_i21 | FGD4  | 0.89   | 0.00   | 6.81  | 0.00 |
| TRINITY_DN104791_c3_g1_i1  | USPL1 | 1.06   | 0.00   | 4.84  | 0.00 |
| TRINITY_DN104805_c0_g1_i5  | MCF2L | 0.13   | 1.04   | -2.95 | 0.00 |
| TRINITY_DN104805_c0_g1_i7  | MCF2L | 0.14   | 1.43   | -3.42 | 0.00 |
| TRINITY_DN104833_c1_g1_i10 | PRP39 | 0.00   | 2.71   | -6.48 | 0.00 |
| TRINITY_DN104833_c1_g1_i2  | PRP39 | 0.00   | 3.47   | -8.23 | 0.00 |
| TRINITY_DN104842_c5_g1_i4  | 3BP1  | 1.37   | 3.68   | -1.43 | 0.00 |
| TRINITY_DN104842_c5_g1_i9  | 3BP1  | 0.53   | 1.60   | -1.64 | 0.00 |
| TRINITY_DN104844_c3_g6_i2  |       | 0.00   | 7.59   | -6.36 | 0.00 |
| TRINITY_DN104857_c0_g1_i11 | NFKB1 | 0.03   | 2.35   | -6.39 | 0.00 |
| TRINITY_DN104861_c1_g1_i2  | MYH9  | 0.32   | 4.29   | -3.62 | 0.00 |
| TRINITY_DN104861_c1_g1_i3  | MYH9  | 0.00   | 2.62   | -6.81 | 0.00 |
| TRINITY_DN104880_c5_g1_i13 | IP3KB | 0.19   | 1.36   | -2.90 | 0.00 |
| TRINITY_DN104880_c5_g3_i1  |       | 0.26   | 9.14   | -4.67 | 0.00 |
| TRINITY_DN104886_c11_g2_i1 |       | 0.63   | 1.75   | -1.49 | 0.00 |
| TRINITY_DN104915_c3_g1_i2  | SPY2  | 1.17   | 3.34   | -1.51 | 0.00 |

|                            |       |       |       |       |      |
|----------------------------|-------|-------|-------|-------|------|
| TRINITY_DN104931_c2_g2_i2  |       | 0.78  | 12.18 | -3.83 | 0.00 |
| TRINITY_DN104934_c1_g1_i5  | RUNX3 | 3.37  | 7.63  | -1.19 | 0.00 |
| TRINITY_DN104936_c2_g1_i7  | GRDN  | 0.70  | 1.94  | -1.51 | 0.00 |
| TRINITY_DN104952_c3_g1_i6  | ELMO1 | 0.03  | 0.71  | -4.34 | 0.00 |
| TRINITY_DN104960_c2_g1_i1  | EM55  | 2.40  | 4.99  | -1.08 | 0.00 |
| TRINITY_DN104971_c3_g1_i1  | COL12 | 8.67  | 4.17  | 1.07  | 0.00 |
| TRINITY_DN104971_c3_g1_i4  | COL12 | 2.51  | 0.86  | 1.53  | 0.00 |
| TRINITY_DN104977_c6_g1_i2  |       | 0.32  | 16.53 | -5.32 | 0.00 |
| TRINITY_DN104982_c2_g1_i3  |       | 30.89 | 13.17 | 1.27  | 0.00 |
| TRINITY_DN104982_c2_g1_i4  |       | 27.90 | 12.92 | 1.15  | 0.00 |
| TRINITY_DN104989_c1_g1_i12 | PI3R6 | 0.64  | 2.72  | -2.14 | 0.00 |
| TRINITY_DN104998_c0_g1_i21 |       | 3.42  | 0.09  | 5.06  | 0.00 |
| TRINITY_DN105001_c8_g1_i2  | MIME  | 13.34 | 5.60  | 1.25  | 0.00 |
| TRINITY_DN105042_c1_g3_i1  |       | 12.65 | 7.23  | 0.80  | 0.00 |
| TRINITY_DN105051_c1_g1_i1  | IL6RA | 2.01  | 6.42  | -1.69 | 0.00 |
| TRINITY_DN105051_c1_g1_i9  | IL6RA | 2.43  | 5.17  | -1.10 | 0.00 |
| TRINITY_DN105062_c0_g3_i1  |       | 9.54  | 32.79 | -1.74 | 0.00 |
| TRINITY_DN105063_c6_g1_i2  |       | 0.76  | 16.20 | -4.42 | 0.00 |
| TRINITY_DN105070_c3_g1_i2  |       | 0.61  | 11.78 | -4.09 | 0.00 |
| TRINITY_DN105070_c3_g1_i3  |       | 0.20  | 13.80 | -5.40 | 0.00 |
| TRINITY_DN105073_c2_g1_i1  | LOX12 | 0.00  | 5.14  | -4.62 | 0.00 |
| TRINITY_DN105073_c4_g1_i3  |       | 9.69  | 17.04 | -0.85 | 0.00 |
| TRINITY_DN105075_c3_g1_i2  |       | 3.82  | 30.70 | -3.01 | 0.00 |
| TRINITY_DN105091_c2_g1_i1  | STAT4 | 2.66  | 9.40  | -1.82 | 0.00 |
| TRINITY_DN105107_c10_g1_i1 |       | 2.37  | 6.99  | -1.58 | 0.00 |
| TRINITY_DN105107_c11_g1_i1 | BMP4  | 4.99  | 2.54  | 0.99  | 0.00 |
| TRINITY_DN105119_c0_g1_i10 | CEP95 | 0.00  | 0.65  | -5.76 | 0.00 |
| TRINITY_DN105123_c3_g1_i1  | CLC4M | 0.40  | 20.39 | -5.32 | 0.00 |
| TRINITY_DN105133_c1_g1_i9  | BIR   | 2.01  | 6.99  | -1.78 | 0.00 |
| TRINITY_DN105133_c1_g3_i1  |       | 6.32  | 12.68 | -0.98 | 0.00 |
| TRINITY_DN105136_c0_g1_i17 | VM2US | 0.00  | 1.43  | -5.21 | 0.00 |
| TRINITY_DN105138_c5_g1_i10 |       | 1.39  | 4.67  | -1.76 | 0.00 |
| TRINITY_DN105138_c5_g1_i13 | LY9   | 0.06  | 1.64  | -4.47 | 0.00 |
| TRINITY_DN105138_c5_g1_i5  | CD2   | 4.06  | 14.51 | -1.91 | 0.00 |
| TRINITY_DN105151_c4_g7_i1  |       | 1.52  | 3.68  | -1.31 | 0.00 |
| TRINITY_DN105163_c2_g2_i5  |       | 5.08  | 35.64 | -2.78 | 0.00 |
| TRINITY_DN105166_c3_g2_i5  | STRP1 | 0.50  | 1.90  | -1.97 | 0.00 |
| TRINITY_DN105175_c2_g1_i2  | CATH  | 2.44  | 0.41  | 2.74  | 0.00 |
| TRINITY_DN105177_c1_g1_i16 | ARC1B | 15.31 | 58.12 | -1.95 | 0.00 |
| TRINITY_DN105177_c1_g1_i7  |       | 1.50  | 42.26 | -4.80 | 0.00 |
| TRINITY_DN105181_c5_g2_i1  |       | 16.42 | 5.72  | 1.53  | 0.00 |
| TRINITY_DN105187_c0_g1_i4  | MPRGA | 0.13  | 1.11  | -3.03 | 0.00 |

|                            |       |       |       |       |      |
|----------------------------|-------|-------|-------|-------|------|
| TRINITY_DN105189_c2_g1_i2  |       | 1.11  | 0.00  | 5.16  | 0.00 |
| TRINITY_DN105189_c3_g5_i1  |       | 0.54  | 1.98  | -1.88 | 0.00 |
| TRINITY_DN105190_c1_g3_i1  | CD2   | 0.90  | 7.60  | -3.08 | 0.00 |
| TRINITY_DN105191_c6_g1_i2  |       | 2.62  | 1.17  | 1.14  | 0.00 |
| TRINITY_DN105197_c0_g1_i12 | SPD2A | 0.00  | 0.31  | -5.19 | 0.00 |
| TRINITY_DN105207_c0_g1_i5  | TAP2  | 0.80  | 4.90  | -2.67 | 0.00 |
| TRINITY_DN105207_c0_g1_i6  | TAP2  | 0.69  | 2.92  | -2.09 | 0.00 |
| TRINITY_DN105226_c6_g1_i7  |       | 2.23  | 0.22  | 2.94  | 0.00 |
| TRINITY_DN105249_c3_g1_i6  | VAV   | 2.87  | 8.40  | -1.61 | 0.00 |
| TRINITY_DN105259_c1_g2_i7  | SORT1 | 2.98  | 11.16 | -1.95 | 0.00 |
| TRINITY_DN105261_c0_g1_i1  | HELZ2 | 0.46  | 2.64  | -2.55 | 0.00 |
| TRINITY_DN105268_c4_g1_i8  |       | 8.42  | 63.65 | -2.85 | 0.00 |
| TRINITY_DN105284_c3_g2_i7  |       | 0.00  | 4.21  | -4.91 | 0.00 |
| TRINITY_DN105284_c3_g2_i9  |       | 0.14  | 1.13  | -3.05 | 0.00 |
| TRINITY_DN105286_c0_g1_i3  | SYNE1 | 1.02  | 2.66  | -1.37 | 0.00 |
| TRINITY_DN105297_c13_g2_i2 | EMAL3 | 0.00  | 2.50  | -6.41 | 0.00 |
| TRINITY_DN105307_c3_g2_i4  | DHR11 | 6.72  | 3.30  | 0.98  | 0.00 |
| TRINITY_DN105326_c0_g1_i8  | PERE  | 0.36  | 5.46  | -3.87 | 0.00 |
| TRINITY_DN105340_c6_g8_i1  |       | 3.51  | 1.03  | 1.76  | 0.00 |
| TRINITY_DN105355_c0_g2_i11 | TCB   | 5.03  | 16.57 | -1.76 | 0.00 |
| TRINITY_DN105355_c0_g2_i6  | TCB   | 3.18  | 19.81 | -2.59 | 0.00 |
| TRINITY_DN105359_c0_g1_i1  |       | 0.37  | 6.67  | -3.24 | 0.00 |
| TRINITY_DN105369_c1_g1_i1  |       | 27.60 | 11.93 | 1.18  | 0.00 |
| TRINITY_DN105370_c2_g3_i1  |       | 0.34  | 3.29  | -2.95 | 0.00 |
| TRINITY_DN105376_c0_g1_i3  | UN13B | 0.28  | 1.07  | -1.90 | 0.00 |
| TRINITY_DN105376_c0_g1_i6  | UN13B | 0.05  | 0.34  | -2.76 | 0.00 |
| TRINITY_DN105378_c5_g1_i2  |       | 0.62  | 4.09  | -2.73 | 0.00 |
| TRINITY_DN105378_c5_g2_i11 | AFF3  | 0.08  | 0.64  | -2.91 | 0.00 |
| TRINITY_DN105383_c3_g1_i6  |       | 6.72  | 3.74  | 0.83  | 0.00 |
| TRINITY_DN105399_c10_g2_i9 |       | 0.00  | 2.25  | -5.70 | 0.00 |
| TRINITY_DN105406_c2_g5_i3  | MDC1  | 0.87  | 0.00  | 5.95  | 0.00 |
| TRINITY_DN105406_c2_g5_i6  | MDC1  | 0.00  | 0.90  | -5.70 | 0.00 |
| TRINITY_DN105411_c2_g1_i4  | PDPK1 | 0.58  | 1.60  | -1.48 | 0.00 |
| TRINITY_DN105412_c5_g1_i11 | KV315 | 1.18  | 10.62 | -3.21 | 0.00 |
| TRINITY_DN105414_c2_g1_i3  |       | 1.63  | 23.35 | -3.81 | 0.00 |
| TRINITY_DN105430_c2_g1_i12 | PA24F | 1.43  | 0.10  | 3.90  | 0.00 |
| TRINITY_DN105440_c2_g1_i15 | RC3H2 | 0.17  | 1.25  | -2.95 | 0.00 |
| TRINITY_DN105451_c6_g2_i3  |       | 0.38  | 2.20  | -2.48 | 0.00 |
| TRINITY_DN105451_c6_g5_i1  | MFS6L | 0.28  | 0.92  | -1.62 | 0.00 |
| TRINITY_DN105467_c0_g5_i2  |       | 0.00  | 5.64  | -7.57 | 0.00 |
| TRINITY_DN105468_c1_g2_i7  | CNNM3 | 0.59  | 0.00  | 5.78  | 0.00 |
| TRINITY_DN105474_c1_g3_i2  | SAM9L | 0.25  | 4.29  | -4.04 | 0.00 |



|                            |       |        |       |       |      |
|----------------------------|-------|--------|-------|-------|------|
| TRINITY_DN105474_c1_g3_i3  | SAM9L | 0.03   | 0.86  | -4.90 | 0.00 |
| TRINITY_DN105474_c1_g3_i5  | SAM9L | 0.05   | 1.53  | -4.66 | 0.00 |
| TRINITY_DN105474_c1_g3_i9  | SAM9L | 0.00   | 0.50  | -4.17 | 0.00 |
| TRINITY_DN105474_c1_g5_i1  | SAM9L | 0.73   | 9.77  | -3.65 | 0.00 |
| TRINITY_DN105482_c11_g3_i1 |       | 3.42   | 8.36  | -1.31 | 0.00 |
| TRINITY_DN105483_c0_g1_i8  | SYNE3 | 0.10   | 1.30  | -3.83 | 0.00 |
| TRINITY_DN105495_c5_g2_i1  |       | 3.14   | 35.69 | -3.38 | 0.00 |
| TRINITY_DN105503_c2_g1_i8  |       | 1.47   | 7.23  | -2.22 | 0.00 |
| TRINITY_DN105510_c3_g1_i1  |       | 7.01   | 4.08  | 0.77  | 0.00 |
| TRINITY_DN105520_c0_g1_i2  |       | 14.58  | 2.36  | 2.67  | 0.00 |
| TRINITY_DN105520_c1_g1_i5  | NECT3 | 1.02   | 4.07  | -2.04 | 0.00 |
| TRINITY_DN105522_c4_g1_i1  | CD4   | 1.31   | 6.29  | -2.28 | 0.00 |
| TRINITY_DN105522_c4_g1_i11 | CD4   | 1.37   | 6.31  | -2.17 | 0.00 |
| TRINITY_DN105533_c6_g2_i1  | FYNB  | 3.68   | 10.62 | -1.55 | 0.00 |
| TRINITY_DN105540_c2_g1_i5  | AEBP1 | 12.85  | 6.11  | 1.12  | 0.00 |
| TRINITY_DN105552_c8_g1_i1  |       | 0.42   | 12.68 | -4.79 | 0.00 |
| TRINITY_DN105565_c1_g2_i1  |       | 10.46  | 17.78 | -0.76 | 0.00 |
| TRINITY_DN105568_c12_g2_i1 |       | 1.61   | 3.46  | -1.09 | 0.00 |
| TRINITY_DN105575_c2_g1_i4  | CGNL1 | 0.00   | 1.25  | -6.18 | 0.00 |
| TRINITY_DN105577_c2_g1_i7  | DRAM1 | 0.50   | 4.10  | -3.02 | 0.00 |
| TRINITY_DN105580_c0_g1_i7  | SHIP1 | 0.08   | 4.04  | -5.66 | 0.00 |
| TRINITY_DN105585_c0_g2_i6  | CBL   | 0.11   | 1.65  | -3.32 | 0.00 |
| TRINITY_DN105594_c4_g1_i2  | MMP2  | 135.10 | 72.28 | 0.91  | 0.00 |
| TRINITY_DN105599_c2_g1_i1  | PLSL  | 10.01  | 22.86 | -1.24 | 0.00 |
| TRINITY_DN105599_c2_g1_i7  | PLSL  | 11.01  | 24.88 | -1.22 | 0.00 |
| TRINITY_DN105599_c2_g1_i8  | PLSL  | 18.37  | 41.74 | -1.20 | 0.00 |
| TRINITY_DN105607_c5_g3_i1  |       | 0.81   | 3.52  | -2.12 | 0.00 |
| TRINITY_DN105637_c5_g2_i5  |       | 3.40   | 0.24  | 2.97  | 0.00 |
| TRINITY_DN105655_c3_g4_i3  |       | 0.00   | 26.11 | -6.58 | 0.00 |
| TRINITY_DN105655_c3_g4_i4  |       | 0.00   | 12.33 | -7.86 | 0.00 |
| TRINITY_DN105655_c3_g4_i5  |       | 0.00   | 30.48 | -5.41 | 0.00 |
| TRINITY_DN105659_c2_g2_i1  |       | 0.00   | 1.57  | -5.26 | 0.00 |
| TRINITY_DN105668_c0_g1_i5  | MSLNL | 4.88   | 0.53  | 3.12  | 0.00 |
| TRINITY_DN105668_c0_g2_i2  |       | 8.95   | 0.51  | 4.06  | 0.00 |
| TRINITY_DN105690_c6_g1_i11 | RHG15 | 0.03   | 1.80  | -5.48 | 0.00 |
| TRINITY_DN105690_c6_g1_i12 | RHG15 | 1.87   | 4.83  | -1.40 | 0.00 |
| TRINITY_DN105690_c6_g1_i2  | RHG15 | 1.18   | 3.14  | -1.42 | 0.00 |
| TRINITY_DN105695_c2_g3_i1  | HDAC2 | 0.55   | 5.85  | -3.42 | 0.00 |
| TRINITY_DN105701_c4_g1_i1  | ZC3H1 | 0.27   | 1.85  | -2.88 | 0.00 |
| TRINITY_DN105701_c4_g1_i16 | ZC3H1 | 0.04   | 0.37  | -3.15 | 0.00 |
| TRINITY_DN105705_c0_g3_i1  | LS14A | 4.37   | 2.87  | 0.61  | 0.00 |
| TRINITY_DN105705_c0_g3_i4  | LS14A | 0.00   | 0.64  | -5.45 | 0.00 |

|                            |       |       |       |       |      |
|----------------------------|-------|-------|-------|-------|------|
| TRINITY_DN105741_c1_g1_i6  | CALD1 | 30.37 | 19.24 | 0.62  | 0.00 |
| TRINITY_DN105741_c1_g2_i1  | TNNT2 | 15.01 | 4.45  | 1.83  | 0.00 |
| TRINITY_DN105747_c1_g1_i1  | ITAX  | 1.89  | 5.87  | -1.65 | 0.00 |
| TRINITY_DN105779_c0_g1_i2  | GVIN1 | 0.55  | 0.39  | -3.42 | 0.00 |
| TRINITY_DN105779_c0_g1_i4  | GVIN1 | 2.17  | 0.00  | 7.26  | 0.00 |
| TRINITY_DN105779_c0_g1_i7  | GVIN1 | 0.22  | 6.21  | -4.99 | 0.00 |
| TRINITY_DN105779_c1_g1_i11 | HPS3  | 0.42  | 1.32  | -1.64 | 0.00 |
| TRINITY_DN105790_c0_g1_i1  | A4    | 8.42  | 4.09  | 1.11  | 0.00 |
| TRINITY_DN105791_c2_g1_i2  | CD248 | 4.66  | 1.23  | 1.97  | 0.00 |
| TRINITY_DN105798_c2_g1_i4  | VP9D1 | 0.12  | 2.71  | -3.98 | 0.00 |
| TRINITY_DN105812_c0_g1_i7  | FADS2 | 0.77  | 2.16  | -1.50 | 0.00 |
| TRINITY_DN105815_c0_g3_i1  | HOME2 | 11.77 | 18.93 | -0.70 | 0.00 |
| TRINITY_DN105836_c7_g2_i2  | GBP1  | 8.48  | 37.31 | -2.10 | 0.00 |
| TRINITY_DN105837_c6_g1_i3  | IGK   | 0.00  | 0.73  | -3.70 | 0.00 |
| TRINITY_DN105841_c2_g1_i5  | FGR1A | 0.01  | 1.08  | -4.42 | 0.00 |
| TRINITY_DN105843_c2_g3_i1  |       | 2.49  | 0.16  | 3.48  | 0.00 |
| TRINITY_DN105846_c2_g1_i4  | CALD1 | 1.30  | 7.98  | -2.71 | 0.00 |
| TRINITY_DN105846_c2_g2_i1  |       | 10.30 | 31.10 | -1.59 | 0.00 |
| TRINITY_DN105851_c3_g1_i7  | AT11B | 0.00  | 0.61  | -5.91 | 0.00 |
| TRINITY_DN105853_c1_g2_i1  |       | 8.67  | 2.11  | 2.16  | 0.00 |
| TRINITY_DN105858_c1_g1_i1  |       | 0.17  | 10.20 | -4.16 | 0.00 |
| TRINITY_DN105858_c4_g1_i1  |       | 1.80  | 19.19 | -3.40 | 0.00 |
| TRINITY_DN105859_c2_g1_i3  | TSP4B | 14.56 | 7.78  | 0.89  | 0.00 |
| TRINITY_DN105874_c0_g1_i2  | RIMB2 | 0.00  | 0.74  | -4.19 | 0.00 |
| TRINITY_DN105893_c0_g1_i1  | PK3CG | 2.02  | 7.67  | -1.94 | 0.00 |
| TRINITY_DN105893_c0_g1_i5  | PK3CG | 0.40  | 1.60  | -2.02 | 0.00 |
| TRINITY_DN105896_c0_g1_i6  | ARIP4 | 0.00  | 0.56  | -3.92 | 0.00 |
| TRINITY_DN105900_c7_g1_i11 | GT2D2 | 1.34  | 0.01  | 6.30  | 0.00 |
| TRINITY_DN105906_c2_g1_i1  | TNR9  | 0.43  | 1.57  | -1.86 | 0.00 |
| TRINITY_DN105907_c5_g2_i2  | TAOK3 | 1.84  | 4.09  | -1.14 | 0.00 |
| TRINITY_DN105910_c0_g2_i8  | LTBP3 | 1.53  | 0.44  | 1.86  | 0.00 |
| TRINITY_DN105918_c2_g1_i1  | UN13D | 0.33  | 2.05  | -2.60 | 0.00 |
| TRINITY_DN105918_c2_g1_i12 | UN13D | 0.39  | 2.26  | -2.46 | 0.00 |
| TRINITY_DN105922_c1_g2_i2  |       | 13.36 | 1.01  | 3.86  | 0.00 |
| TRINITY_DN105941_c1_g4_i1  |       | 9.07  | 2.58  | 1.84  | 0.00 |
| TRINITY_DN105945_c0_g1_i3  | LOXL1 | 4.90  | 1.99  | 1.27  | 0.00 |
| TRINITY_DN105952_c1_g1_i12 | STRN  | 0.64  | 0.00  | 5.08  | 0.00 |
| TRINITY_DN105977_c6_g1_i2  | PTN6  | 2.04  | 8.24  | -2.01 | 0.00 |
| TRINITY_DN105977_c6_g1_i6  | PTN6  | 7.29  | 13.01 | -0.85 | 0.00 |
| TRINITY_DN105990_c0_g1_i9  | CEAM1 | 0.00  | 0.43  | -4.99 | 0.00 |
| TRINITY_DN105997_c1_g2_i2  | KCNH2 | 0.00  | 0.60  | -6.21 | 0.00 |
| TRINITY_DN106002_c6_g2_i1  | FLNA  | 4.72  | 0.33  | 3.54  | 0.00 |

|                            |       |       |       |       |      |
|----------------------------|-------|-------|-------|-------|------|
| TRINITY_DN106007_c1_g1_i1  | PREX1 | 0.15  | 1.78  | -3.19 | 0.00 |
| TRINITY_DN106007_c1_g1_i4  | PREX1 | 0.90  | 2.02  | -1.18 | 0.00 |
| TRINITY_DN106008_c3_g1_i1  | GIMA4 | 3.56  | 12.90 | -1.90 | 0.00 |
| TRINITY_DN106008_c3_g1_i4  | GIMA7 | 10.24 | 75.06 | -2.86 | 0.00 |
| TRINITY_DN106014_c3_g2_i10 | PKHA6 | 0.07  | 1.47  | -4.36 | 0.00 |
| TRINITY_DN106017_c2_g1_i3  | FAK2  | 1.78  | 7.77  | -2.15 | 0.00 |
| TRINITY_DN106020_c0_g1_i10 | IDE   | 3.23  | 2.18  | 0.55  | 0.00 |
| TRINITY_DN106020_c0_g1_i6  | IDE   | 0.00  | 0.66  | -5.42 | 0.00 |
| TRINITY_DN106034_c2_g2_i1  |       | 7.72  | 19.52 | -1.36 | 0.00 |
| TRINITY_DN106034_c3_g1_i17 | FCL   | 8.58  | 19.01 | -1.18 | 0.00 |
| TRINITY_DN106036_c11_g1_i1 |       | 0.32  | 9.12  | -3.98 | 0.00 |
| TRINITY_DN106037_c0_g1_i12 | DZIP1 | 0.32  | 0.01  | 4.93  | 0.00 |
| TRINITY_DN106037_c0_g1_i9  | DZIP1 | 0.58  | 0.03  | 4.59  | 0.00 |
| TRINITY_DN106038_c7_g2_i1  |       | 1.93  | 4.93  | -1.36 | 0.00 |
| TRINITY_DN106043_c3_g1_i1  | BCAP  | 0.13  | 1.15  | -3.17 | 0.00 |
| TRINITY_DN106043_c3_g1_i7  | BCAP  | 0.39  | 1.52  | -1.93 | 0.00 |
| TRINITY_DN106067_c0_g1_i1  | GALT8 | 0.10  | 9.11  | -5.96 | 0.00 |
| TRINITY_DN106067_c0_g1_i10 | GLT18 | 3.12  | 6.33  | -1.05 | 0.00 |
| TRINITY_DN106067_c0_g1_i2  | GLT18 | 0.03  | 4.51  | -5.90 | 0.00 |
| TRINITY_DN106067_c0_g1_i8  | GALT8 | 0.25  | 9.89  | -5.20 | 0.00 |
| TRINITY_DN106067_c0_g2_i3  | GALT8 | 0.16  | 8.81  | -5.65 | 0.00 |
| TRINITY_DN106067_c0_g2_i6  | GALT8 | 13.65 | 32.02 | -1.26 | 0.00 |
| TRINITY_DN106067_c0_g4_i1  |       | 0.88  | 15.56 | -4.09 | 0.00 |
| TRINITY_DN106081_c1_g1_i1  | NCS1  | 1.12  | 0.46  | 1.24  | 0.00 |
| TRINITY_DN106087_c4_g1_i3  | SDHL  | 11.27 | 39.67 | -1.86 | 0.00 |
| TRINITY_DN106109_c2_g1_i11 |       | 1.08  | 9.82  | -3.15 | 0.00 |
| TRINITY_DN106109_c2_g1_i14 |       | 2.82  | 15.32 | -2.45 | 0.00 |
| TRINITY_DN106109_c2_g1_i16 |       | 1.63  | 16.74 | -3.52 | 0.00 |
| TRINITY_DN106137_c11_g3_i1 |       | 0.68  | 2.09  | -1.65 | 0.00 |
| TRINITY_DN106139_c4_g1_i3  |       | 9.13  | 5.25  | 0.78  | 0.00 |
| TRINITY_DN106170_c3_g2_i3  |       | 2.12  | 6.87  | -1.73 | 0.00 |
| TRINITY_DN106170_c5_g1_i13 | SIA8F | 0.04  | 0.74  | -4.47 | 0.00 |
| TRINITY_DN106172_c10_g1_i3 |       | 0.03  | 1.19  | -5.18 | 0.00 |
| TRINITY_DN106173_c1_g2_i8  |       | 18.05 | 33.38 | -0.88 | 0.00 |
| TRINITY_DN106174_c0_g3_i1  | SMBT2 | 9.96  | 42.63 | -2.07 | 0.00 |
| TRINITY_DN106182_c1_g2_i1  | MEFV  | 1.04  | 12.24 | -3.36 | 0.00 |
| TRINITY_DN106190_c2_g1_i1  |       | 96.66 | 25.95 | 2.00  | 0.00 |
| TRINITY_DN106205_c9_g3_i1  | CSK   | 2.47  | 5.57  | -1.16 | 0.00 |
| TRINITY_DN106209_c2_g1_i3  | KACB  | 0.89  | 3.50  | -1.87 | 0.00 |
| TRINITY_DN106209_c3_g2_i3  |       | 0.00  | 5.38  | -3.92 | 0.00 |
| TRINITY_DN106222_c4_g4_i1  | CNPY3 | 4.63  | 11.30 | -1.28 | 0.00 |
| TRINITY_DN106230_c1_g1_i15 | GCC2  | 0.35  | 7.00  | -4.06 | 0.00 |

|                            |       |       |       |        |      |
|----------------------------|-------|-------|-------|--------|------|
| TRINITY_DN106239_c1_g1_i8  | HVM15 | 0.00  | 2.66  | -4.17  | 0.00 |
| TRINITY_DN106249_c5_g1_i1  |       | 0.63  | 30.52 | -5.43  | 0.00 |
| TRINITY_DN106250_c0_g1_i2  | B915  | 3.16  | 7.39  | -1.23  | 0.00 |
| TRINITY_DN106250_c0_g8_i1  |       | 3.44  | 7.45  | -1.11  | 0.00 |
| TRINITY_DN106257_c0_g3_i1  | SMC1A | 1.73  | 12.66 | -2.81  | 0.00 |
| TRINITY_DN106258_c0_g1_i1  |       | 0.22  | 2.99  | -3.97  | 0.00 |
| TRINITY_DN106273_c0_g1_i12 | MPSF  | 2.14  | 0.02  | 6.61   | 0.00 |
| TRINITY_DN106273_c0_g1_i6  | MPSF  | 0.00  | 4.37  | -24.06 | 0.00 |
| TRINITY_DN106277_c11_g2_i1 |       | 0.14  | 1.18  | -3.11  | 0.00 |
| TRINITY_DN106315_c4_g2_i5  |       | 1.58  | 13.82 | -3.03  | 0.00 |
| TRINITY_DN106315_c4_g4_i2  | MIA   | 8.10  | 2.86  | 1.71   | 0.00 |
| TRINITY_DN106317_c8_g4_i4  |       | 0.00  | 2.17  | -4.34  | 0.00 |
| TRINITY_DN106318_c1_g2_i1  | ICAM1 | 1.37  | 7.71  | -2.58  | 0.00 |
| TRINITY_DN106318_c1_g2_i2  | ICAM1 | 3.14  | 8.43  | -1.46  | 0.00 |
| TRINITY_DN106329_c1_g1_i7  | ETS1A | 3.84  | 7.66  | -1.05  | 0.00 |
| TRINITY_DN106331_c8_g1_i1  |       | 0.33  | 3.02  | -3.53  | 0.00 |
| TRINITY_DN106334_c1_g1_i7  | URGCP | 0.06  | 7.29  | -6.52  | 0.00 |
| TRINITY_DN106334_c1_g2_i1  | GVIN1 | 0.19  | 9.15  | -5.24  | 0.00 |
| TRINITY_DN106353_c3_g1_i5  |       | 4.34  | 24.01 | -2.51  | 0.00 |
| TRINITY_DN106367_c2_g1_i2  | ARF2  | 0.00  | 4.51  | -7.48  | 0.00 |
| TRINITY_DN106391_c3_g1_i1  | INSI1 | 3.42  | 6.45  | -0.94  | 0.00 |
| TRINITY_DN106392_c0_g1_i5  | SHOT1 | 1.86  | 4.79  | -1.38  | 0.00 |
| TRINITY_DN106398_c6_g1_i4  |       | 12.95 | 60.51 | -2.28  | 0.00 |
| TRINITY_DN106409_c4_g2_i2  | EMSA1 | 1.15  | 0.03  | 4.89   | 0.00 |
| TRINITY_DN106410_c1_g2_i12 | M4K1  | 0.02  | 1.33  | -5.43  | 0.00 |
| TRINITY_DN106410_c1_g2_i15 | M4K1  | 0.03  | 1.38  | -4.56  | 0.00 |
| TRINITY_DN106415_c0_g2_i1  | IF2B3 | 1.25  | 0.01  | 6.91   | 0.00 |
| TRINITY_DN106424_c6_g9_i1  |       | 0.95  | 10.11 | -3.36  | 0.00 |
| TRINITY_DN106428_c15_g1_i1 |       | 8.37  | 19.32 | -1.20  | 0.00 |
| TRINITY_DN106438_c10_g2_i2 |       | 3.03  | 0.56  | 2.56   | 0.00 |
| TRINITY_DN106439_c0_g1_i1  |       | 5.36  | 18.06 | -1.77  | 0.00 |
| TRINITY_DN106439_c0_g3_i1  |       | 0.95  | 3.14  | -1.67  | 0.00 |
| TRINITY_DN106439_c1_g1_i3  | RAB44 | 1.03  | 3.88  | -1.93  | 0.00 |
| TRINITY_DN106439_c1_g3_i1  |       | 1.40  | 6.09  | -2.12  | 0.00 |
| TRINITY_DN106439_c1_g4_i1  |       | 0.90  | 17.45 | -4.06  | 0.00 |
| TRINITY_DN106444_c1_g1_i6  | ARAP1 | 1.05  | 3.06  | -1.56  | 0.00 |
| TRINITY_DN106445_c3_g1_i1  | PAR14 | 0.01  | 0.57  | -5.02  | 0.00 |
| TRINITY_DN106447_c3_g2_i2  | FMOD  | 2.78  | 0.06  | 5.21   | 0.00 |
| TRINITY_DN106450_c2_g1_i3  | DOCK2 | 0.01  | 0.49  | -5.05  | 0.00 |
| TRINITY_DN106450_c2_g1_i8  | DOCK2 | 0.04  | 1.38  | -5.92  | 0.00 |
| TRINITY_DN106461_c1_g1_i6  | KC1DB | 0.05  | 2.10  | -5.35  | 0.00 |
| TRINITY_DN106469_c0_g1_i1  |       | 0.24  | 3.52  | -3.54  | 0.00 |

|                            |       |        |        |       |      |
|----------------------------|-------|--------|--------|-------|------|
| TRINITY_DN106484_c1_g1_i17 | ATG9A | 0.01   | 0.49   | -5.17 | 0.00 |
| TRINITY_DN106500_c2_g1_i1  | HCLS1 | 6.75   | 22.33  | -1.81 | 0.00 |
| TRINITY_DN106503_c0_g1_i6  | NCOA3 | 1.59   | 7.33   | -2.24 | 0.00 |
| TRINITY_DN106533_c3_g1_i1  |       | 0.44   | 3.47   | -3.04 | 0.00 |
| TRINITY_DN106536_c1_g2_i5  | TMC7  | 0.00   | 0.87   | -6.10 | 0.00 |
| TRINITY_DN106557_c7_g2_i2  |       | 3.89   | 14.98  | -1.84 | 0.00 |
| TRINITY_DN106560_c2_g1_i1  |       | 0.94   | 5.53   | -2.55 | 0.00 |
| TRINITY_DN106575_c3_g3_i3  | ICOSL | 0.61   | 2.38   | -1.92 | 0.00 |
| TRINITY_DN106580_c2_g1_i16 | CARL1 | 1.62   | 0.05   | 4.88  | 0.00 |
| TRINITY_DN106601_c3_g1_i7  | GOGA4 | 0.02   | 0.67   | -4.85 | 0.00 |
| TRINITY_DN106603_c1_g3_i8  | NECT3 | 0.70   | 4.21   | -2.74 | 0.00 |
| TRINITY_DN106612_c2_g1_i10 | SI1L2 | 0.34   | 1.16   | -1.78 | 0.00 |
| TRINITY_DN106612_c2_g1_i8  | SI1L1 | 0.44   | 1.64   | -1.89 | 0.00 |
| TRINITY_DN106614_c0_g1_i1  | EFHD2 | 27.76  | 40.61  | -0.58 | 0.00 |
| TRINITY_DN106617_c1_g2_i8  | CAM1B | 0.02   | 0.41   | -3.84 | 0.00 |
| TRINITY_DN106626_c6_g1_i17 | GPC6A | 0.21   | 0.86   | -2.16 | 0.00 |
| TRINITY_DN106627_c2_g2_i5  |       | 5.66   | 0.28   | 4.29  | 0.00 |
| TRINITY_DN106632_c3_g1_i13 | WNK1  | 0.00   | 0.85   | -5.93 | 0.00 |
| TRINITY_DN106635_c17_g2_i3 | TCB1  | 11.14  | 0.86   | 3.83  | 0.00 |
| TRINITY_DN106647_c3_g1_i2  | IFI44 | 0.76   | 5.79   | -2.99 | 0.00 |
| TRINITY_DN106647_c3_g1_i4  | IFI44 | 0.28   | 5.45   | -4.33 | 0.00 |
| TRINITY_DN106647_c3_g1_i5  | IFI44 | 6.03   | 67.09  | -3.41 | 0.00 |
| TRINITY_DN106651_c2_g2_i4  | COHA1 | 11.40  | 2.82   | 1.07  | 0.00 |
| TRINITY_DN106653_c1_g1_i9  | HARB1 | 0.05   | 1.40   | -5.40 | 0.00 |
| TRINITY_DN106665_c2_g1_i4  | TNIP1 | 9.03   | 19.15  | -1.10 | 0.00 |
| TRINITY_DN106665_c2_g6_i1  |       | 21.64  | 31.95  | -0.59 | 0.00 |
| TRINITY_DN106672_c2_g1_i1  | E41L2 | 4.16   | 9.77   | -1.19 | 0.00 |
| TRINITY_DN106689_c2_g1_i1  |       | 13.84  | 23.98  | -0.79 | 0.00 |
| TRINITY_DN106701_c4_g1_i3  | K1C13 | 100.67 | 33.39  | 1.72  | 0.00 |
| TRINITY_DN106701_c4_g1_i4  | K1C13 | 123.06 | 49.22  | 1.47  | 0.00 |
| TRINITY_DN106701_c4_g2_i1  | K1C13 | 136.32 | 50.83  | 1.53  | 0.00 |
| TRINITY_DN106701_c4_g4_i4  | K1C13 | 102.18 | 34.10  | 1.64  | 0.00 |
| TRINITY_DN106701_c4_g4_i6  | K1C13 | 488.52 | 148.04 | 1.92  | 0.00 |
| TRINITY_DN106709_c1_g3_i1  |       | 8.11   | 22.56  | -1.46 | 0.00 |
| TRINITY_DN106722_c1_g1_i7  | GLCNE | 0.00   | 1.35   | -5.64 | 0.00 |
| TRINITY_DN106740_c2_g7_i1  |       | 30.31  | 12.34  | 1.34  | 0.00 |
| TRINITY_DN106759_c4_g1_i4  | MRP1  | 0.67   | 4.98   | -2.78 | 0.00 |
| TRINITY_DN106759_c4_g3_i1  | MRP3  | 4.72   | 14.83  | -1.65 | 0.00 |
| TRINITY_DN106759_c4_g5_i1  | MRP2  | 2.77   | 22.20  | -2.85 | 0.00 |
| TRINITY_DN106766_c4_g4_i1  |       | 3.44   | 1.23   | 1.55  | 0.00 |
| TRINITY_DN106774_c2_g2_i3  | LAMB1 | 6.17   | 3.13   | 1.02  | 0.00 |
| TRINITY_DN106783_c3_g1_i4  | HOOK2 | 0.00   | 1.29   | -6.45 | 0.00 |

|                            |       |        |        |       |      |
|----------------------------|-------|--------|--------|-------|------|
| TRINITY_DN106791_c5_g1_i7  | SP14L | 0.80   | 4.21   | -2.37 | 0.00 |
| TRINITY_DN106797_c14_g1_i1 |       | 0.00   | 11.07  | -5.05 | 0.00 |
| TRINITY_DN106801_c1_g1_i2  | TF29  | 0.00   | 0.79   | -6.33 | 0.00 |
| TRINITY_DN106818_c9_g1_i1  |       | 75.38  | 127.53 | -0.73 | 0.00 |
| TRINITY_DN106841_c5_g1_i6  |       | 239.35 | 120.27 | 1.05  | 0.00 |
| TRINITY_DN106841_c5_g1_i8  | CO1A1 | 202.30 | 98.88  | 1.06  | 0.00 |
| TRINITY_DN106855_c2_g2_i1  | DGKZ  | 0.19   | 1.13   | -2.72 | 0.00 |
| TRINITY_DN106890_c4_g1_i6  | MICA2 | 0.00   | 0.72   | -6.09 | 0.00 |
| TRINITY_DN106899_c1_g1_i1  | CO1A1 | 268.57 | 133.93 | 1.05  | 0.00 |
| TRINITY_DN106904_c1_g1_i4  |       | 10.58  | 0.79   | 3.78  | 0.00 |
| TRINITY_DN106915_c5_g2_i5  | EFC1  | 15.94  | 1.41   | 3.54  | 0.00 |
| TRINITY_DN106926_c2_g2_i6  | TRPM4 | 0.10   | 2.12   | -4.26 | 0.00 |
| TRINITY_DN106936_c9_g3_i1  |       | 0.60   | 8.87   | -3.75 | 0.00 |
| TRINITY_DN106951_c1_g2_i2  | BLNK  | 0.14   | 0.76   | -2.42 | 0.00 |
| TRINITY_DN106954_c3_g1_i1  | MPRI  | 0.01   | 0.30   | -3.85 | 0.00 |
| TRINITY_DN106971_c7_g1_i1  |       | 1.82   | 51.97  | -4.86 | 0.00 |
| TRINITY_DN106971_c7_g1_i2  |       | 25.11  | 232.97 | -3.26 | 0.00 |
| TRINITY_DN106971_c7_g1_i3  |       | 3.42   | 63.33  | -4.25 | 0.00 |
| TRINITY_DN106984_c6_g1_i6  | FCGBP | 4.56   | 1.62   | 1.49  | 0.00 |
| TRINITY_DN106984_c6_g1_i8  | FCGBP | 27.26  | 6.00   | 2.13  | 0.00 |
| TRINITY_DN106992_c3_g1_i2  | SORL  | 0.00   | 0.79   | -6.82 | 0.00 |
| TRINITY_DN106993_c0_g1_i6  | LIPB2 | 0.02   | 0.48   | -4.80 | 0.00 |
| TRINITY_DN106994_c1_g2_i1  |       | 34.63  | 15.67  | 1.16  | 0.00 |
| TRINITY_DN106994_c2_g2_i6  | CO5A1 | 13.92  | 3.81   | 1.92  | 0.00 |
| TRINITY_DN106997_c1_g2_i1  | THB   | 0.00   | 2.12   | -5.29 | 0.00 |
| TRINITY_DN107000_c2_g3_i1  |       | 17.17  | 2.79   | 2.71  | 0.00 |
| TRINITY_DN107048_c7_g3_i1  |       | 0.00   | 8.15   | -6.38 | 0.00 |
| TRINITY_DN107054_c12_g1_i4 |       | 38.83  | 1.63   | 4.69  | 0.00 |
| TRINITY_DN107054_c12_g3_i2 |       | 5.11   | 13.83  | -1.45 | 0.00 |
| TRINITY_DN107079_c5_g2_i1  |       | 30.02  | 63.62  | -1.10 | 0.00 |
| TRINITY_DN107079_c5_g6_i1  |       | 29.62  | 76.17  | -1.36 | 0.00 |
| TRINITY_DN107094_c6_g1_i2  |       | 1.90   | 5.85   | -1.65 | 0.00 |
| TRINITY_DN107096_c2_g1_i4  | KLF11 | 8.85   | 2.94   | 1.55  | 0.00 |
| TRINITY_DN107112_c2_g1_i1  | MYSS  | 10.69  | 1.56   | 2.72  | 0.00 |
| TRINITY_DN107130_c6_g1_i1  |       | 1.47   | 0.12   | 3.79  | 0.00 |
| TRINITY_DN107140_c42_g2_i8 | AATM  | 0.13   | 4.44   | -3.99 | 0.00 |
| TRINITY_DN107145_c28_g2_i1 | IRF4  | 0.57   | 3.62   | -2.47 | 0.00 |
| TRINITY_DN107146_c73_g1_i1 | LMO7  | 11.82  | 4.91   | 1.29  | 0.00 |
| TRINITY_DN107149_c53_g1_i1 |       | 0.81   | 3.66   | -2.11 | 0.00 |
| TRINITY_DN107152_c11_g1_i1 | YTX2  | 1.42   | 3.03   | -1.13 | 0.00 |
| TRINITY_DN107157_c9_g2_i1  |       | 30.45  | 113.16 | -1.93 | 0.00 |
| TRINITY_DN108183_c0_g1_i1  |       | 1.83   | 16.34  | -3.04 | 0.00 |

|                           |       |       |       |       |      |
|---------------------------|-------|-------|-------|-------|------|
| TRINITY_DN111156_c0_g1_i1 |       | 0.09  | 7.11  | -3.81 | 0.00 |
| TRINITY_DN115242_c0_g1_i1 |       | 15.28 | 47.70 | -1.58 | 0.00 |
| TRINITY_DN121623_c0_g1_i1 |       | 13.72 | 47.92 | -1.83 | 0.00 |
| TRINITY_DN125187_c0_g1_i1 |       | 23.63 | 8.49  | 1.45  | 0.00 |
| TRINITY_DN133738_c0_g1_i1 | HOME2 | 10.31 | 37.09 | -1.83 | 0.00 |
| TRINITY_DN1361_c0_g1_i1   |       | 0.00  | 6.81  | -3.83 | 0.00 |
| TRINITY_DN23370_c0_g1_i1  |       | 3.92  | 24.60 | -2.69 | 0.00 |
| TRINITY_DN23667_c0_g1_i1  |       | 0.00  | 1.20  | -3.76 | 0.00 |
| TRINITY_DN3196_c0_g1_i1   |       | 1.17  | 8.26  | -2.92 | 0.00 |
| TRINITY_DN36087_c0_g1_i1  |       | 0.15  | 1.57  | -3.10 | 0.00 |
| TRINITY_DN38417_c0_g1_i1  |       | 0.00  | 3.47  | -3.85 | 0.00 |
| TRINITY_DN43023_c0_g1_i1  | N42L1 | 0.82  | 4.25  | -2.48 | 0.00 |
| TRINITY_DN44472_c0_g1_i1  |       | 2.35  | 9.38  | -1.97 | 0.00 |
| TRINITY_DN44584_c0_g1_i1  |       | 11.54 | 42.83 | -1.92 | 0.00 |
| TRINITY_DN5681_c0_g1_i2   | ARL6  | 0.04  | 1.30  | -3.55 | 0.00 |
| TRINITY_DN569_c0_g2_i1    | GP119 | 2.91  | 0.29  | 3.17  | 0.00 |
| TRINITY_DN59000_c0_g1_i1  | NOD1  | 0.43  | 1.66  | -2.02 | 0.00 |
| TRINITY_DN60275_c0_g1_i4  |       | 0.09  | 2.43  | -4.37 | 0.00 |
| TRINITY_DN60666_c0_g1_i1  | CLD3  | 11.15 | 77.45 | -2.82 | 0.00 |
| TRINITY_DN60727_c0_g2_i1  |       | 0.00  | 0.74  | -3.76 | 0.00 |
| TRINITY_DN60944_c0_g1_i1  |       | 2.10  | 6.48  | -1.69 | 0.00 |
| TRINITY_DN61172_c0_g1_i1  |       | 0.81  | 3.64  | -2.37 | 0.00 |
| TRINITY_DN61948_c0_g1_i1  |       | 1.33  | 12.97 | -3.18 | 0.00 |
| TRINITY_DN6588_c0_g1_i1   |       | 1.64  | 7.37  | -2.22 | 0.00 |
| TRINITY_DN66397_c0_g1_i2  |       | 0.00  | 16.82 | -4.43 | 0.00 |
| TRINITY_DN68307_c0_g1_i1  | CCL4  | 6.41  | 59.48 | -3.19 | 0.00 |
| TRINITY_DN71151_c0_g1_i1  |       | 0.16  | 0.82  | -2.30 | 0.00 |
| TRINITY_DN71262_c1_g1_i1  |       | 0.00  | 6.46  | -3.91 | 0.00 |
| TRINITY_DN71475_c0_g1_i1  |       | 0.06  | 0.83  | -3.38 | 0.00 |
| TRINITY_DN71799_c0_g1_i2  | PCKGC | 1.17  | 0.25  | 2.16  | 0.00 |
| TRINITY_DN71842_c0_g1_i1  | ENDD1 | 0.00  | 2.03  | -5.76 | 0.00 |
| TRINITY_DN72285_c0_g1_i1  | P2Y11 | 0.15  | 0.77  | -2.42 | 0.00 |
| TRINITY_DN72304_c0_g1_i1  | CLTR2 | 0.72  | 2.68  | -1.93 | 0.00 |
| TRINITY_DN72734_c0_g1_i1  |       | 0.10  | 3.79  | -4.42 | 0.00 |
| TRINITY_DN72749_c0_g2_i1  | S10A1 | 6.84  | 27.38 | -2.05 | 0.00 |
| TRINITY_DN73207_c0_g1_i1  |       | 0.38  | 2.47  | -2.67 | 0.00 |
| TRINITY_DN73373_c0_g1_i1  | ENDD1 | 0.29  | 4.48  | -3.98 | 0.00 |
| TRINITY_DN74958_c0_g1_i1  |       | 0.53  | 10.73 | -3.43 | 0.00 |
| TRINITY_DN76112_c0_g1_i1  |       | 0.16  | 4.60  | -3.87 | 0.00 |
| TRINITY_DN76313_c0_g1_i1  | GPAT4 | 0.23  | 2.31  | -3.35 | 0.00 |
| TRINITY_DN76612_c0_g1_i1  | FCERG | 8.62  | 27.47 | -1.73 | 0.00 |
| TRINITY_DN76612_c0_g1_i2  | FCERG | 3.27  | 12.10 | -1.91 | 0.00 |

|                          |       |        |        |       |      |
|--------------------------|-------|--------|--------|-------|------|
| TRINITY_DN77803_c0_g2_i1 | ALN   | 1.26   | 0.05   | 4.05  | 0.00 |
| TRINITY_DN78257_c0_g1_i1 | DYR   | 7.91   | 4.14   | 0.96  | 0.00 |
| TRINITY_DN78417_c0_g1_i1 |       | 0.05   | 1.43   | -3.94 | 0.00 |
| TRINITY_DN78624_c0_g1_i1 | IRG1  | 0.16   | 1.37   | -3.17 | 0.00 |
| TRINITY_DN78990_c0_g1_i1 |       | 0.16   | 1.63   | -3.14 | 0.00 |
| TRINITY_DN79211_c0_g1_i1 | FA5   | 0.30   | 9.20   | -3.47 | 0.00 |
| TRINITY_DN79289_c0_g1_i2 |       | 1.20   | 22.07  | -3.73 | 0.00 |
| TRINITY_DN79418_c0_g1_i1 |       | 26.79  | 75.02  | -1.47 | 0.00 |
| TRINITY_DN79651_c0_g1_i1 | ESPN  | 0.27   | 3.39   | -3.32 | 0.00 |
| TRINITY_DN79854_c0_g1_i1 |       | 2.27   | 0.20   | 3.71  | 0.00 |
| TRINITY_DN80026_c0_g1_i1 |       | 0.15   | 2.98   | -3.39 | 0.00 |
| TRINITY_DN80180_c0_g1_i1 |       | 0.25   | 2.82   | -3.36 | 0.00 |
| TRINITY_DN80741_c0_g1_i1 |       | 106.82 | 19.21  | 2.60  | 0.00 |
| TRINITY_DN80773_c0_g2_i1 |       | 0.85   | 6.42   | -2.99 | 0.00 |
| TRINITY_DN80798_c0_g1_i1 | IFM5  | 8.94   | 3.15   | 1.62  | 0.00 |
| TRINITY_DN80867_c0_g1_i1 |       | 1.50   | 10.93  | -2.80 | 0.00 |
| TRINITY_DN80947_c0_g1_i1 |       | 0.00   | 1.33   | -3.83 | 0.00 |
| TRINITY_DN81260_c0_g1_i1 |       | 0.07   | 1.01   | -3.38 | 0.00 |
| TRINITY_DN81341_c0_g1_i4 | ST17A | 0.02   | 0.99   | -4.71 | 0.00 |
| TRINITY_DN81624_c0_g1_i2 |       | 8.40   | 0.67   | 3.57  | 0.00 |
| TRINITY_DN81690_c0_g1_i1 | ADK   | 3.75   | 1.35   | 1.49  | 0.00 |
| TRINITY_DN81795_c1_g1_i1 |       | 0.32   | 5.59   | -3.76 | 0.00 |
| TRINITY_DN81953_c0_g1_i1 | FCGBP | 11.53  | 2.53   | 2.14  | 0.00 |
| TRINITY_DN81969_c0_g1_i1 | CLC4M | 3.77   | 0.65   | 2.45  | 0.00 |
| TRINITY_DN82017_c0_g1_i2 | NDUA4 | 13.76  | 5.75   | 1.23  | 0.00 |
| TRINITY_DN82018_c0_g1_i1 |       | 27.97  | 16.07  | 0.81  | 0.00 |
| TRINITY_DN82134_c0_g1_i1 |       | 0.48   | 9.43   | -3.59 | 0.00 |
| TRINITY_DN82337_c0_g1_i1 |       | 0.35   | 1.49   | -2.18 | 0.00 |
| TRINITY_DN82690_c0_g1_i1 |       | 0.09   | 75.89  | -9.90 | 0.00 |
| TRINITY_DN82690_c0_g1_i2 |       | 19.48  | 758.38 | -5.22 | 0.00 |
| TRINITY_DN82746_c0_g1_i1 |       | 2.88   | 8.73   | -1.54 | 0.00 |
| TRINITY_DN82772_c0_g1_i1 |       | 6.15   | 24.64  | -1.94 | 0.00 |
| TRINITY_DN82845_c0_g1_i1 | HPRT  | 0.06   | 1.83   | -3.60 | 0.00 |
| TRINITY_DN82919_c0_g1_i1 | PSB7  | 37.43  | 19.04  | 1.04  | 0.00 |
| TRINITY_DN83100_c0_g1_i1 |       | 1.43   | 13.01  | -2.98 | 0.00 |
| TRINITY_DN83234_c0_g1_i2 | ZN831 | 0.10   | 1.02   | -2.96 | 0.00 |
| TRINITY_DN83451_c0_g1_i1 |       | 8.67   | 32.45  | -1.97 | 0.00 |
| TRINITY_DN83639_c0_g1_i1 |       | 10.71  | 65.68  | -2.73 | 0.00 |
| TRINITY_DN83856_c0_g1_i1 |       | 0.00   | 6.11   | -3.96 | 0.00 |
| TRINITY_DN83889_c1_g1_i1 | TNR9  | 0.03   | 1.19   | -4.08 | 0.00 |
| TRINITY_DN83901_c0_g2_i3 |       | 0.04   | 1.67   | -4.84 | 0.00 |
| TRINITY_DN83923_c0_g1_i3 |       | 0.54   | 5.69   | -3.10 | 0.00 |



|                          |       |        |        |       |      |
|--------------------------|-------|--------|--------|-------|------|
| TRINITY_DN84204_c0_g1_i1 | FGL2  | 1.48   | 0.14   | 3.62  | 0.00 |
| TRINITY_DN84224_c0_g1_i1 |       | 0.00   | 2.44   | -3.84 | 0.00 |
| TRINITY_DN84359_c0_g1_i1 |       | 0.30   | 11.14  | -3.91 | 0.00 |
| TRINITY_DN84385_c0_g1_i1 | AGRA2 | 1.88   | 0.18   | 3.15  | 0.00 |
| TRINITY_DN84508_c0_g1_i1 | R213A | 0.23   | 2.04   | -3.01 | 0.00 |
| TRINITY_DN84605_c0_g1_i1 |       | 11.77  | 39.05  | -1.73 | 0.00 |
| TRINITY_DN84672_c0_g1_i1 | ENDD1 | 0.02   | 1.52   | -4.98 | 0.00 |
| TRINITY_DN84740_c0_g1_i1 | MRP1  | 0.57   | 4.51   | -2.76 | 0.00 |
| TRINITY_DN84762_c0_g1_i1 | SLAP2 | 0.08   | 1.19   | -3.84 | 0.00 |
| TRINITY_DN84762_c0_g2_i1 | SLAP2 | 0.35   | 2.69   | -2.96 | 0.00 |
| TRINITY_DN84928_c0_g1_i3 |       | 107.24 | 384.61 | -1.78 | 0.00 |
| TRINITY_DN84955_c1_g1_i1 | PGFRL | 33.84  | 16.41  | 1.07  | 0.00 |
| TRINITY_DN84985_c0_g1_i1 |       | 25.83  | 92.38  | -1.86 | 0.00 |
| TRINITY_DN85079_c0_g1_i1 | RABP1 | 3.38   | 0.79   | 2.13  | 0.00 |
| TRINITY_DN85289_c0_g1_i1 | CCL3  | 0.26   | 5.95   | -4.48 | 0.00 |
| TRINITY_DN85306_c0_g1_i1 | MRP3  | 3.89   | 17.20  | -2.14 | 0.00 |
| TRINITY_DN85316_c0_g1_i1 |       | 0.27   | 9.76   | -3.89 | 0.00 |
| TRINITY_DN85388_c0_g1_i1 |       | 0.12   | 0.99   | -2.73 | 0.00 |
| TRINITY_DN85452_c0_g1_i1 | CXG1  | 1.79   | 0.41   | 2.14  | 0.00 |
| TRINITY_DN85491_c0_g1_i1 |       | 2.93   | 1.01   | 1.55  | 0.00 |
| TRINITY_DN85560_c0_g1_i1 |       | 1.58   | 0.45   | 1.75  | 0.00 |
| TRINITY_DN85611_c0_g1_i1 | EVI2A | 4.11   | 11.26  | -1.51 | 0.00 |
| TRINITY_DN85717_c0_g1_i1 |       | 10.69  | 59.42  | -2.47 | 0.00 |
| TRINITY_DN85732_c0_g2_i1 |       | 0.98   | 15.14  | -3.92 | 0.00 |
| TRINITY_DN85766_c0_g1_i1 |       | 1.04   | 5.21   | -2.39 | 0.00 |
| TRINITY_DN85777_c0_g1_i2 | TM35A | 1.35   | 3.11   | -1.23 | 0.00 |
| TRINITY_DN85808_c0_g1_i2 | CA123 | 0.36   | 2.56   | -3.03 | 0.00 |
| TRINITY_DN85928_c0_g1_i1 |       | 5.58   | 29.07  | -2.42 | 0.00 |
| TRINITY_DN85937_c1_g1_i1 | FARX  | 0.57   | 9.17   | -3.05 | 0.00 |
| TRINITY_DN86001_c0_g1_i2 | SLAP1 | 12.83  | 39.99  | -1.65 | 0.00 |
| TRINITY_DN86039_c0_g1_i2 |       | 0.00   | 20.14  | -6.36 | 0.00 |
| TRINITY_DN86106_c1_g1_i1 |       | 0.94   | 7.64   | -3.16 | 0.00 |
| TRINITY_DN86106_c1_g2_i4 |       | 0.77   | 9.68   | -3.66 | 0.00 |
| TRINITY_DN86195_c0_g1_i1 |       | 40.64  | 84.22  | -1.07 | 0.00 |
| TRINITY_DN86197_c0_g1_i1 |       | 0.05   | 3.16   | -4.49 | 0.00 |
| TRINITY_DN86214_c0_g1_i1 | GPR35 | 0.27   | 1.42   | -2.38 | 0.00 |
| TRINITY_DN86254_c0_g1_i1 |       | 111.75 | 631.83 | -2.64 | 0.00 |
| TRINITY_DN86290_c0_g1_i1 | USMG5 | 178.91 | 98.78  | 0.82  | 0.00 |
| TRINITY_DN86328_c0_g1_i1 |       | 0.12   | 2.11   | -3.73 | 0.00 |
| TRINITY_DN86407_c0_g1_i4 |       | 0.00   | 1.82   | -4.00 | 0.00 |
| TRINITY_DN86415_c0_g1_i3 | KLK8  | 0.00   | 8.56   | -7.50 | 0.00 |
| TRINITY_DN86467_c0_g1_i1 |       | 0.36   | 4.33   | -3.46 | 0.00 |

|                          |       |        |        |       |      |
|--------------------------|-------|--------|--------|-------|------|
| TRINITY_DN86469_c0_g2_i3 | FAM3C | 3.98   | 13.84  | -1.79 | 0.00 |
| TRINITY_DN86495_c0_g1_i1 | RABP2 | 9.40   | 3.87   | 1.30  | 0.00 |
| TRINITY_DN86512_c0_g1_i4 | SMD3  | 12.60  | 18.66  | -0.59 | 0.00 |
| TRINITY_DN86527_c0_g1_i1 |       | 5.95   | 16.53  | -1.50 | 0.00 |
| TRINITY_DN86611_c0_g1_i1 |       | 5.82   | 39.97  | -2.78 | 0.00 |
| TRINITY_DN86628_c0_g2_i1 | PERE  | 0.19   | 3.85   | -4.27 | 0.00 |
| TRINITY_DN86633_c0_g1_i1 | NF70  | 1.26   | 2.68   | -1.14 | 0.00 |
| TRINITY_DN86679_c0_g1_i1 |       | 1.32   | 0.43   | 1.59  | 0.00 |
| TRINITY_DN86706_c0_g2_i1 |       | 0.26   | 2.48   | -3.09 | 0.00 |
| TRINITY_DN86759_c0_g1_i1 |       | 3.02   | 0.12   | 4.36  | 0.00 |
| TRINITY_DN86773_c0_g2_i1 | C1QL4 | 27.83  | 11.92  | 1.22  | 0.00 |
| TRINITY_DN86777_c0_g1_i1 |       | 5.07   | 1.24   | 2.09  | 0.00 |
| TRINITY_DN86849_c0_g1_i5 |       | 1.25   | 7.39   | -2.37 | 0.00 |
| TRINITY_DN86887_c0_g1_i3 | CCL20 | 0.53   | 9.58   | -4.30 | 0.00 |
| TRINITY_DN86901_c0_g1_i2 |       | 0.94   | 0.06   | 3.47  | 0.00 |
| TRINITY_DN86927_c0_g1_i1 | PANX3 | 1.01   | 0.14   | 2.77  | 0.00 |
| TRINITY_DN86965_c0_g1_i2 |       | 0.84   | 7.60   | -3.14 | 0.00 |
| TRINITY_DN86965_c0_g2_i1 | UBIL  | 5.46   | 47.39  | -3.11 | 0.00 |
| TRINITY_DN87020_c0_g2_i1 |       | 4.35   | 8.79   | -1.01 | 0.00 |
| TRINITY_DN87120_c0_g2_i1 | IRG1  | 0.04   | 1.37   | -3.55 | 0.00 |
| TRINITY_DN87120_c0_g3_i2 |       | 1.40   | 16.65  | -3.28 | 0.00 |
| TRINITY_DN87169_c0_g1_i3 | DTX3L | 54.09  | 138.42 | -1.32 | 0.00 |
| TRINITY_DN87180_c0_g1_i3 | SLK   | 0.41   | 4.57   | -3.44 | 0.00 |
| TRINITY_DN87219_c0_g1_i3 |       | 7.61   | 0.44   | 3.71  | 0.00 |
| TRINITY_DN87241_c0_g1_i2 |       | 0.78   | 8.89   | -3.36 | 0.00 |
| TRINITY_DN87242_c2_g1_i1 |       | 2.69   | 15.28  | -2.51 | 0.00 |
| TRINITY_DN87242_c2_g2_i1 |       | 0.17   | 3.64   | -4.19 | 0.00 |
| TRINITY_DN87323_c0_g1_i1 | GPR4  | 0.46   | 1.54   | -1.67 | 0.00 |
| TRINITY_DN87416_c0_g4_i2 |       | 0.00   | 5.13   | -6.69 | 0.00 |
| TRINITY_DN87431_c0_g1_i1 |       | 0.43   | 2.67   | -2.60 | 0.00 |
| TRINITY_DN87431_c0_g1_i3 |       | 0.25   | 1.63   | -2.79 | 0.00 |
| TRINITY_DN87479_c0_g2_i1 |       | 2.60   | 1.21   | 1.15  | 0.00 |
| TRINITY_DN87510_c0_g1_i3 |       | 25.39  | 11.58  | 1.12  | 0.00 |
| TRINITY_DN87516_c0_g1_i1 | SAPC1 | 3.70   | 1.05   | 1.86  | 0.00 |
| TRINITY_DN87535_c0_g2_i2 |       | 0.59   | 2.51   | -2.16 | 0.00 |
| TRINITY_DN87548_c0_g1_i9 |       | 52.18  | 163.67 | -1.65 | 0.00 |
| TRINITY_DN87553_c0_g1_i3 |       | 0.41   | 3.53   | -3.03 | 0.00 |
| TRINITY_DN87560_c0_g1_i2 | IGSF6 | 3.96   | 9.19   | -1.28 | 0.00 |
| TRINITY_DN87577_c0_g1_i1 |       | 5.72   | 42.50  | -2.85 | 0.00 |
| TRINITY_DN87635_c0_g2_i2 | IL17F | 0.09   | 2.73   | -4.53 | 0.00 |
| TRINITY_DN87702_c0_g1_i1 |       | 38.69  | 161.81 | -2.06 | 0.00 |
| TRINITY_DN87721_c0_g1_i1 |       | 244.71 | 128.60 | 1.02  | 0.00 |

|                           |       |        |        |       |      |
|---------------------------|-------|--------|--------|-------|------|
| TRINITY_DN87790_c0_g1_i3  |       | 0.53   | 3.36   | -2.72 | 0.00 |
| TRINITY_DN87876_c0_g1_i1  | IEX1  | 9.66   | 23.38  | -1.30 | 0.00 |
| TRINITY_DN87878_c0_g1_i2  | IMP1L | 14.35  | 6.15   | 1.21  | 0.00 |
| TRINITY_DN87879_c0_g1_i1  |       | 10.14  | 21.80  | -1.14 | 0.00 |
| TRINITY_DN87879_c0_g2_i1  |       | 5.30   | 12.23  | -1.22 | 0.00 |
| TRINITY_DN87884_c0_g1_i1  | PLC   | 0.18   | 1.56   | -3.11 | 0.00 |
| TRINITY_DN87922_c0_g1_i1  | LYG   | 159.92 | 298.46 | -0.88 | 0.00 |
| TRINITY_DN87922_c0_g1_i4  | LYG   | 38.54  | 63.81  | -0.75 | 0.00 |
| TRINITY_DN87925_c0_g1_i3  | SAM12 | 10.87  | 7.04   | 0.62  | 0.00 |
| TRINITY_DN87938_c0_g1_i4  |       | 0.84   | 3.21   | -1.95 | 0.00 |
| TRINITY_DN87974_c0_g1_i1  |       | 8.75   | 30.82  | -1.77 | 0.00 |
| TRINITY_DN87995_c0_g1_i1  | PPT2A | 2.28   | 6.12   | -1.40 | 0.00 |
| TRINITY_DN87999_c0_g3_i1  |       | 0.43   | 2.28   | -2.41 | 0.00 |
| TRINITY_DN88002_c0_g1_i1  | LONF3 | 1.19   | 0.54   | 1.14  | 0.00 |
| TRINITY_DN88023_c0_g1_i1  |       | 0.80   | 9.69   | -3.70 | 0.00 |
| TRINITY_DN88023_c0_g2_i1  |       | 26.46  | 175.19 | -2.67 | 0.00 |
| TRINITY_DN88042_c0_g1_i1  |       | 1.15   | 10.12  | -3.14 | 0.00 |
| TRINITY_DN88078_c0_g2_i1  | ZN366 | 2.04   | 4.97   | -1.30 | 0.00 |
| TRINITY_DN88081_c0_g1_i1  |       | 7.59   | 3.92   | 0.95  | 0.00 |
| TRINITY_DN88082_c0_g1_i1  |       | 18.57  | 55.02  | -1.62 | 0.00 |
| TRINITY_DN88099_c0_g1_i1  |       | 0.46   | 7.90   | -3.41 | 0.00 |
| TRINITY_DN88099_c0_g1_i10 |       | 2.23   | 41.29  | -4.47 | 0.00 |
| TRINITY_DN88099_c0_g1_i3  |       | 0.07   | 1.41   | -3.69 | 0.00 |
| TRINITY_DN88100_c0_g1_i1  |       | 6.55   | 73.77  | -3.50 | 0.00 |
| TRINITY_DN88121_c0_g1_i1  |       | 4.09   | 21.12  | -2.40 | 0.00 |
| TRINITY_DN88155_c0_g1_i2  |       | 14.12  | 33.02  | -1.24 | 0.00 |
| TRINITY_DN88178_c0_g1_i1  |       | 15.26  | 47.05  | -1.61 | 0.00 |
| TRINITY_DN88189_c0_g2_i1  | RIC3  | 1.54   | 5.29   | -1.76 | 0.00 |
| TRINITY_DN88215_c1_g3_i2  | COLL2 | 0.66   | 18.67  | -4.02 | 0.00 |
| TRINITY_DN88251_c4_g1_i2  | TRI63 | 2.38   | 0.61   | 1.90  | 0.00 |
| TRINITY_DN88280_c0_g2_i3  |       | 2.60   | 12.21  | -2.32 | 0.00 |
| TRINITY_DN88290_c1_g1_i5  |       | 1.84   | 6.97   | -1.92 | 0.00 |
| TRINITY_DN88299_c0_g1_i2  | T3JAM | 0.23   | 2.94   | -3.76 | 0.00 |
| TRINITY_DN88300_c2_g1_i1  | CCL2  | 6.34   | 14.08  | -1.19 | 0.00 |
| TRINITY_DN88326_c0_g2_i1  | APOC1 | 207.41 | 70.29  | 1.73  | 0.00 |
| TRINITY_DN88368_c0_g1_i2  | CCL4  | 0.08   | 3.42   | -4.97 | 0.00 |
| TRINITY_DN88392_c0_g1_i1  |       | 71.57  | 175.83 | -1.32 | 0.00 |
| TRINITY_DN88394_c0_g1_i2  | FADD  | 8.13   | 13.24  | -0.71 | 0.00 |
| TRINITY_DN88496_c0_g1_i1  |       | 28.61  | 10.05  | 0.79  | 0.00 |
| TRINITY_DN88515_c0_g1_i3  |       | 0.24   | 6.34   | -4.09 | 0.00 |
| TRINITY_DN88548_c0_g1_i3  | CCL19 | 10.94  | 42.05  | -1.81 | 0.00 |
| TRINITY_DN88556_c0_g1_i1  | IF44L | 0.01   | 1.63   | -5.63 | 0.00 |

|                           |       |       |        |        |      |
|---------------------------|-------|-------|--------|--------|------|
| TRINITY_DN88556_c0_g1_i2  | IF44L | 0.11  | 5.79   | -5.79  | 0.00 |
| TRINITY_DN88556_c0_g1_i3  | IF44L | 0.03  | 2.50   | -5.74  | 0.00 |
| TRINITY_DN88572_c1_g1_i1  | M1I1B | 34.61 | 57.95  | -0.73  | 0.00 |
| TRINITY_DN88592_c3_g3_i1  |       | 0.08  | 1.29   | -3.26  | 0.00 |
| TRINITY_DN88616_c1_g1_i4  |       | 2.09  | 11.67  | -2.45  | 0.00 |
| TRINITY_DN88616_c1_g1_i9  |       | 3.04  | 23.21  | -3.03  | 0.00 |
| TRINITY_DN88616_c1_g2_i1  |       | 2.23  | 10.86  | -2.41  | 0.00 |
| TRINITY_DN88616_c1_g2_i4  | CD3D  | 2.67  | 13.84  | -2.35  | 0.00 |
| TRINITY_DN88616_c1_g3_i1  |       | 3.68  | 18.07  | -2.42  | 0.00 |
| TRINITY_DN88616_c1_g3_i2  |       | 39.97 | 233.64 | -2.59  | 0.00 |
| TRINITY_DN88634_c0_g1_i5  |       | 12.13 | 31.07  | -1.32  | 0.00 |
| TRINITY_DN88640_c13_g1_i3 |       | 0.45  | 2.51   | -2.45  | 0.00 |
| TRINITY_DN88650_c6_g1_i1  |       | 0.14  | 1.89   | -3.40  | 0.00 |
| TRINITY_DN88668_c0_g1_i2  | T255B | 2.27  | 0.77   | 1.58   | 0.00 |
| TRINITY_DN88675_c0_g1_i2  | GBG13 | 2.67  | 22.45  | -3.07  | 0.00 |
| TRINITY_DN88687_c3_g1_i2  |       | 0.75  | 6.69   | -3.22  | 0.00 |
| TRINITY_DN88715_c0_g1_i1  |       | 2.95  | 111.92 | -5.22  | 0.00 |
| TRINITY_DN88740_c0_g1_i1  |       | 4.61  | 12.79  | -1.46  | 0.00 |
| TRINITY_DN88740_c0_g3_i1  | SELPL | 4.03  | 12.05  | -1.60  | 0.00 |
| TRINITY_DN88741_c3_g1_i1  |       | 2.03  | 6.74   | -1.62  | 0.00 |
| TRINITY_DN88742_c0_g1_i1  |       | 31.57 | 113.66 | -1.88  | 0.00 |
| TRINITY_DN88750_c0_g4_i2  |       | 0.16  | 1.21   | -3.22  | 0.00 |
| TRINITY_DN88758_c0_g1_i2  |       | 3.05  | 0.30   | 3.50   | 0.00 |
| TRINITY_DN88765_c0_g1_i1  |       | 1.37  | 26.02  | -4.27  | 0.00 |
| TRINITY_DN88765_c0_g1_i2  |       | 0.13  | 4.72   | -5.17  | 0.00 |
| TRINITY_DN88765_c0_g1_i3  |       | 0.19  | 5.80   | -5.11  | 0.00 |
| TRINITY_DN88765_c0_g1_i5  |       | 0.94  | 11.01  | -3.65  | 0.00 |
| TRINITY_DN88794_c8_g1_i1  |       | 1.33  | 3.18   | -1.27  | 0.00 |
| TRINITY_DN88823_c0_g1_i1  |       | 0.21  | 2.28   | -3.13  | 0.00 |
| TRINITY_DN88855_c0_g3_i1  | NADL2 | 2.33  | 3.77   | -0.72  | 0.00 |
| TRINITY_DN88867_c0_g3_i2  | F111A | 0.00  | 2.30   | -5.17  | 0.00 |
| TRINITY_DN88881_c2_g1_i1  |       | 2.52  | 14.97  | -2.44  | 0.00 |
| TRINITY_DN88892_c0_g1_i1  | OLF3A | 23.81 | 12.66  | 0.90   | 0.00 |
| TRINITY_DN88911_c0_g1_i10 |       | 1.91  | 0.45   | 2.08   | 0.00 |
| TRINITY_DN88930_c2_g1_i2  |       | 1.15  | 11.37  | -3.54  | 0.00 |
| TRINITY_DN88970_c12_g1_i1 |       | 0.28  | 2.07   | -2.69  | 0.00 |
| TRINITY_DN88987_c3_g1_i10 | CCL4  | 0.08  | 29.67  | -7.40  | 0.00 |
| TRINITY_DN88987_c3_g1_i12 | CCL4  | 0.27  | 16.70  | -5.83  | 0.00 |
| TRINITY_DN88987_c3_g1_i4  | CCL4  | 0.00  | 23.06  | -22.36 | 0.00 |
| TRINITY_DN88987_c3_g3_i1  |       | 1.51  | 41.83  | -4.82  | 0.00 |
| TRINITY_DN88987_c3_g7_i1  |       | 8.69  | 166.77 | -4.28  | 0.00 |
| TRINITY_DN88997_c0_g2_i6  | CX6C1 | 0.00  | 32.58  | -8.26  | 0.00 |

|                           |       |        |        |        |      |
|---------------------------|-------|--------|--------|--------|------|
| TRINITY_DN88999_c3_g1_i1  | HSP70 | 28.77  | 11.64  | 1.31   | 0.00 |
| TRINITY_DN89008_c0_g5_i3  | GRP3  | 0.09   | 0.81   | -3.20  | 0.00 |
| TRINITY_DN89012_c0_g1_i2  | DAPP1 | 1.72   | 7.39   | -2.06  | 0.00 |
| TRINITY_DN89020_c0_g1_i5  | LEG3  | 0.79   | 0.03   | 4.31   | 0.00 |
| TRINITY_DN89029_c3_g1_i3  |       | 0.00   | 2.94   | -5.25  | 0.00 |
| TRINITY_DN89040_c3_g1_i2  |       | 21.85  | 2.51   | 3.21   | 0.00 |
| TRINITY_DN89042_c1_g1_i4  |       | 186.53 | 83.28  | 1.14   | 0.00 |
| TRINITY_DN89060_c6_g5_i1  |       | 25.22  | 88.37  | -1.84  | 0.00 |
| TRINITY_DN89065_c5_g1_i1  |       | 3.44   | 17.77  | -2.45  | 0.00 |
| TRINITY_DN89087_c3_g1_i8  | CD6   | 0.26   | 4.26   | -4.09  | 0.00 |
| TRINITY_DN89099_c0_g1_i2  |       | 10.98  | 66.77  | -2.59  | 0.00 |
| TRINITY_DN89099_c0_g1_i8  |       | 8.55   | 28.45  | -1.76  | 0.00 |
| TRINITY_DN89113_c0_g1_i1  | PLBL1 | 7.12   | 14.08  | -0.97  | 0.00 |
| TRINITY_DN89132_c0_g1_i2  | HPSE  | 3.55   | 9.72   | -1.46  | 0.00 |
| TRINITY_DN89133_c0_g1_i6  | STAT3 | 2.28   | 0.10   | 4.61   | 0.00 |
| TRINITY_DN89163_c0_g1_i1  |       | 0.00   | 0.96   | -3.81  | 0.00 |
| TRINITY_DN89172_c2_g1_i1  |       | 20.40  | 3.69   | 2.46   | 0.00 |
| TRINITY_DN89278_c0_g1_i1  |       | 0.00   | 14.45  | -8.47  | 0.00 |
| TRINITY_DN89278_c0_g1_i3  |       | 38.00  | 6.68   | 2.55   | 0.00 |
| TRINITY_DN89285_c0_g1_i11 | C1QA  | 0.00   | 9.47   | -20.66 | 0.00 |
| TRINITY_DN89292_c0_g1_i4  | MYPR  | 1.13   | 0.00   | 5.73   | 0.00 |
| TRINITY_DN89303_c11_g1_i1 |       | 5.94   | 2.04   | 1.55   | 0.00 |
| TRINITY_DN89331_c0_g1_i1  |       | 0.75   | 13.37  | -4.12  | 0.00 |
| TRINITY_DN89337_c2_g1_i1  | BIN3  | 13.37  | 5.45   | 1.29   | 0.00 |
| TRINITY_DN89341_c2_g7_i1  |       | 4.15   | 12.71  | -1.53  | 0.00 |
| TRINITY_DN89390_c2_g1_i1  |       | 3.22   | 9.92   | -1.62  | 0.00 |
| TRINITY_DN89398_c6_g1_i10 | RS12  | 463.26 | 157.44 | 1.70   | 0.00 |
| TRINITY_DN89404_c0_g2_i2  | CCR6  | 0.37   | 4.99   | -3.75  | 0.00 |
| TRINITY_DN89409_c0_g2_i4  | CID2A | 2.28   | 6.02   | -1.42  | 0.00 |
| TRINITY_DN89413_c0_g1_i2  |       | 3.28   | 10.96  | -1.73  | 0.00 |
| TRINITY_DN89414_c2_g1_i3  | MAG   | 0.38   | 2.25   | -2.58  | 0.00 |
| TRINITY_DN89415_c6_g2_i8  | CBL   | 0.14   | 1.86   | -3.88  | 0.00 |
| TRINITY_DN89419_c3_g1_i3  | CRIP2 | 6.72   | 26.45  | -2.02  | 0.00 |
| TRINITY_DN89428_c0_g1_i14 |       | 1.40   | 0.03   | 5.51   | 0.00 |
| TRINITY_DN89447_c6_g1_i3  |       | 0.22   | 3.35   | -3.69  | 0.00 |
| TRINITY_DN89448_c4_g1_i2  |       | 0.00   | 12.52  | -4.00  | 0.00 |
| TRINITY_DN89472_c9_g1_i1  |       | 0.41   | 2.70   | -2.72  | 0.00 |
| TRINITY_DN89500_c3_g1_i2  | NACA  | 0.06   | 0.94   | -3.59  | 0.00 |
| TRINITY_DN89501_c4_g1_i1  |       | 0.66   | 40.50  | -5.88  | 0.00 |
| TRINITY_DN89501_c4_g1_i10 |       | 0.02   | 4.54   | -6.96  | 0.00 |
| TRINITY_DN89501_c4_g1_i2  |       | 0.23   | 12.32  | -5.74  | 0.00 |
| TRINITY_DN89501_c4_g1_i3  |       | 0.14   | 6.47   | -5.42  | 0.00 |

|                           |       |        |        |       |      |
|---------------------------|-------|--------|--------|-------|------|
| TRINITY_DN89501_c4_g1_i4  |       | 0.04   | 7.44   | -7.15 | 0.00 |
| TRINITY_DN89501_c4_g1_i5  |       | 0.04   | 7.48   | -7.05 | 0.00 |
| TRINITY_DN89501_c4_g1_i7  |       | 0.13   | 5.69   | -5.34 | 0.00 |
| TRINITY_DN89501_c4_g1_i8  |       | 0.08   | 10.28  | -7.13 | 0.00 |
| TRINITY_DN89506_c8_g1_i2  |       | 1.67   | 9.22   | -2.45 | 0.00 |
| TRINITY_DN89517_c0_g2_i1  |       | 12.58  | 82.14  | -2.73 | 0.00 |
| TRINITY_DN89543_c3_g1_i1  |       | 0.72   | 4.10   | -2.52 | 0.00 |
| TRINITY_DN89567_c1_g2_i4  |       | 0.05   | 2.39   | -4.03 | 0.00 |
| TRINITY_DN89567_c1_g2_i6  |       | 1.40   | 6.43   | -2.09 | 0.00 |
| TRINITY_DN89567_c1_g3_i2  |       | 0.17   | 7.22   | -5.27 | 0.00 |
| TRINITY_DN89569_c3_g1_i1  |       | 12.62  | 0.12   | 4.66  | 0.00 |
| TRINITY_DN89572_c4_g8_i1  | IF1AX | 11.04  | 1.14   | 3.19  | 0.00 |
| TRINITY_DN89600_c0_g5_i1  |       | 2.64   | 0.78   | 1.76  | 0.00 |
| TRINITY_DN89604_c2_g1_i15 | VIME  | 43.61  | 28.12  | 0.62  | 0.00 |
| TRINITY_DN89604_c2_g1_i9  | VIME  | 6.87   | 0.91   | 3.17  | 0.00 |
| TRINITY_DN89604_c2_g2_i2  | VIME  | 2.22   | 0.47   | 2.39  | 0.00 |
| TRINITY_DN89605_c5_g1_i1  | NMES1 | 36.97  | 70.38  | -0.96 | 0.00 |
| TRINITY_DN89624_c0_g1_i1  | CO2A1 | 6.95   | 1.39   | 2.35  | 0.00 |
| TRINITY_DN89660_c0_g2_i1  |       | 0.05   | 0.70   | -3.25 | 0.00 |
| TRINITY_DN89660_c1_g1_i14 |       | 0.68   | 5.19   | -2.79 | 0.00 |
| TRINITY_DN89660_c1_g1_i15 |       | 0.30   | 8.50   | -3.97 | 0.00 |
| TRINITY_DN89677_c0_g1_i5  |       | 0.32   | 0.02   | 4.03  | 0.00 |
| TRINITY_DN89682_c2_g1_i7  | RBM28 | 0.07   | 1.29   | -4.03 | 0.00 |
| TRINITY_DN89690_c0_g3_i1  | ADT2  | 62.59  | 39.40  | 0.68  | 0.00 |
| TRINITY_DN89693_c5_g1_i1  |       | 0.07   | 0.92   | -3.41 | 0.00 |
| TRINITY_DN89706_c6_g3_i1  | PD1L1 | 1.15   | 2.50   | -1.12 | 0.00 |
| TRINITY_DN89709_c0_g1_i1  | AATF  | 0.00   | 1.57   | -4.10 | 0.00 |
| TRINITY_DN89730_c7_g2_i6  | PTGIS | 0.19   | 0.71   | -1.98 | 0.00 |
| TRINITY_DN89737_c0_g1_i4  | RM46  | 7.77   | 1.02   | 2.85  | 0.00 |
| TRINITY_DN89737_c0_g1_i5  | RM46  | 0.17   | 2.35   | -3.84 | 0.00 |
| TRINITY_DN89745_c2_g3_i1  |       | 5.41   | 0.24   | 4.76  | 0.00 |
| TRINITY_DN89746_c0_g1_i3  | RET4B | 430.62 | 194.42 | 1.18  | 0.00 |
| TRINITY_DN89746_c0_g1_i8  | RET4A | 70.61  | 34.31  | 1.09  | 0.00 |
| TRINITY_DN89774_c3_g1_i11 | IVD   | 0.00   | 1.54   | -5.67 | 0.00 |
| TRINITY_DN89782_c4_g1_i1  |       | 0.00   | 10.87  | -4.26 | 0.00 |
| TRINITY_DN89789_c0_g1_i2  |       | 0.00   | 8.33   | -7.17 | 0.00 |
| TRINITY_DN89798_c4_g1_i3  |       | 37.16  | 18.85  | 1.06  | 0.00 |
| TRINITY_DN89802_c0_g1_i2  |       | 3.58   | 37.63  | -3.27 | 0.00 |
| TRINITY_DN89802_c0_g1_i3  |       | 9.18   | 40.61  | -2.19 | 0.00 |
| TRINITY_DN89804_c0_g1_i2  |       | 0.89   | 2.13   | -1.23 | 0.00 |
| TRINITY_DN89816_c2_g2_i1  | TPSN  | 14.31  | 43.75  | -1.63 | 0.00 |
| TRINITY_DN89820_c0_g1_i3  | TNFA  | 0.16   | 1.11   | -2.96 | 0.00 |

|                           |       |       |        |       |      |
|---------------------------|-------|-------|--------|-------|------|
| TRINITY_DN89822_c9_g2_i2  |       | 0.81  | 0.00   | 5.38  | 0.00 |
| TRINITY_DN89826_c4_g3_i2  |       | 5.60  | 2.66   | 1.03  | 0.00 |
| TRINITY_DN89834_c2_g1_i3  | TNF14 | 0.00  | 0.90   | -4.93 | 0.00 |
| TRINITY_DN89845_c3_g1_i1  |       | 0.70  | 8.94   | -3.54 | 0.00 |
| TRINITY_DN89847_c0_g2_i7  | B4GT1 | 1.12  | 5.41   | -2.25 | 0.00 |
| TRINITY_DN89880_c0_g1_i1  | TRI36 | 0.24  | 0.91   | -1.92 | 0.00 |
| TRINITY_DN89885_c0_g1_i1  |       | 3.13  | 9.74   | -1.65 | 0.00 |
| TRINITY_DN89896_c9_g1_i2  |       | 0.41  | 2.62   | -2.69 | 0.00 |
| TRINITY_DN89896_c9_g1_i3  |       | 23.91 | 157.91 | -2.79 | 0.00 |
| TRINITY_DN89915_c3_g2_i1  |       | 2.66  | 22.40  | -2.90 | 0.00 |
| TRINITY_DN89940_c3_g1_i1  | APOH  | 6.73  | 1.19   | 2.60  | 0.00 |
| TRINITY_DN89952_c0_g1_i2  | NUBP2 | 0.00  | 3.23   | -6.59 | 0.00 |
| TRINITY_DN89955_c2_g1_i2  | CIKS  | 0.32  | 1.36   | -2.11 | 0.00 |
| TRINITY_DN89957_c0_g2_i1  |       | 0.23  | 2.83   | -3.38 | 0.00 |
| TRINITY_DN89957_c0_g6_i1  |       | 0.40  | 5.86   | -3.24 | 0.00 |
| TRINITY_DN89958_c2_g1_i1  |       | 0.43  | 4.08   | -2.98 | 0.00 |
| TRINITY_DN89958_c2_g2_i2  | CLC4F | 0.00  | 1.35   | -4.95 | 0.00 |
| TRINITY_DN89965_c10_g2_i1 |       | 23.68 | 16.69  | 0.51  | 0.00 |
| TRINITY_DN89967_c8_g1_i1  | COTL1 | 91.33 | 172.18 | -0.94 | 0.00 |
| TRINITY_DN89967_c8_g1_i2  | COTL1 | 92.47 | 149.25 | -0.73 | 0.00 |
| TRINITY_DN89968_c4_g1_i2  | ARHG3 | 7.54  | 23.17  | -1.66 | 0.00 |
| TRINITY_DN89968_c5_g2_i3  |       | 1.54  | 5.15   | -1.73 | 0.00 |
| TRINITY_DN89968_c5_g3_i1  |       | 0.44  | 6.10   | -3.23 | 0.00 |
| TRINITY_DN89977_c9_g1_i2  |       | 1.28  | 12.33  | -3.22 | 0.00 |
| TRINITY_DN90017_c0_g1_i1  | CTHR1 | 5.22  | 2.22   | 1.26  | 0.00 |
| TRINITY_DN90039_c5_g1_i2  |       | 64.67 | 20.73  | 1.70  | 0.00 |
| TRINITY_DN90056_c8_g1_i1  |       | 1.13  | 13.41  | -3.40 | 0.00 |
| TRINITY_DN90057_c4_g1_i2  | SH21A | 2.75  | 11.37  | -2.09 | 0.00 |
| TRINITY_DN90068_c1_g5_i1  |       | 6.34  | 0.22   | 4.69  | 0.00 |
| TRINITY_DN90069_c0_g4_i1  |       | 0.81  | 3.80   | -2.20 | 0.00 |
| TRINITY_DN90076_c0_g1_i1  |       | 2.38  | 9.62   | -2.01 | 0.00 |
| TRINITY_DN90085_c7_g2_i2  |       | 2.19  | 0.73   | 1.63  | 0.00 |
| TRINITY_DN90087_c0_g1_i4  |       | 0.02  | 1.09   | -4.88 | 0.00 |
| TRINITY_DN90104_c0_g1_i2  | GCNT3 | 0.11  | 1.00   | -3.15 | 0.00 |
| TRINITY_DN90140_c6_g3_i1  |       | 2.69  | 15.39  | -2.56 | 0.00 |
| TRINITY_DN90144_c2_g4_i2  |       | 36.86 | 106.19 | -1.45 | 0.00 |
| TRINITY_DN90150_c3_g3_i7  |       | 8.86  | 28.96  | -1.70 | 0.00 |
| TRINITY_DN90157_c5_g2_i1  |       | 0.07  | 2.77   | -3.80 | 0.00 |
| TRINITY_DN90157_c5_g9_i1  |       | 1.52  | 0.11   | 3.61  | 0.00 |
| TRINITY_DN90165_c5_g2_i1  |       | 20.85 | 82.25  | -1.96 | 0.00 |
| TRINITY_DN90169_c8_g1_i1  |       | 0.11  | 2.94   | -4.04 | 0.00 |
| TRINITY_DN90176_c0_g1_i3  | MII1B | 1.13  | 2.80   | -1.34 | 0.00 |

|                           |       |       |        |       |      |
|---------------------------|-------|-------|--------|-------|------|
| TRINITY_DN90186_c5_g4_i1  |       | 5.66  | 35.63  | -2.52 | 0.00 |
| TRINITY_DN90203_c10_g1_i2 | RNLS  | 0.04  | 1.24   | -3.63 | 0.00 |
| TRINITY_DN90208_c0_g1_i1  | HMX2  | 0.05  | 1.17   | -4.24 | 0.00 |
| TRINITY_DN90208_c0_g1_i3  | HMX2  | 0.68  | 1.96   | -1.50 | 0.00 |
| TRINITY_DN90211_c10_g1_i3 | PSB7  | 27.85 | 50.04  | -0.88 | 0.00 |
| TRINITY_DN90217_c3_g1_i3  | SAMN1 | 2.27  | 5.64   | -1.30 | 0.00 |
| TRINITY_DN90233_c1_g2_i1  | GBP4  | 0.26  | 4.31   | -3.97 | 0.00 |
| TRINITY_DN90259_c6_g1_i2  |       | 1.86  | 15.00  | -2.97 | 0.00 |
| TRINITY_DN90274_c8_g3_i1  |       | 0.00  | 3.18   | -6.38 | 0.00 |
| TRINITY_DN90275_c7_g1_i1  |       | 0.83  | 4.01   | -2.33 | 0.00 |
| TRINITY_DN90293_c1_g1_i1  | PPIP1 | 0.55  | 2.04   | -1.84 | 0.00 |
| TRINITY_DN90314_c5_g6_i1  |       | 0.26  | 1.37   | -2.27 | 0.00 |
| TRINITY_DN90352_c0_g3_i4  | TWST2 | 1.98  | 0.64   | 1.69  | 0.00 |
| TRINITY_DN90357_c4_g2_i8  |       | 16.70 | 90.75  | -2.58 | 0.00 |
| TRINITY_DN90368_c10_g1_i1 | CLD4  | 1.27  | 4.91   | -1.95 | 0.00 |
| TRINITY_DN90378_c0_g1_i5  | MFAP2 | 36.66 | 19.30  | 0.96  | 0.00 |
| TRINITY_DN90382_c3_g4_i1  |       | 0.43  | 1.97   | -2.11 | 0.00 |
| TRINITY_DN90413_c0_g1_i1  | CLC4F | 0.92  | 4.70   | -2.36 | 0.00 |
| TRINITY_DN90424_c0_g1_i2  | JUNB  | 6.25  | 3.00   | 1.04  | 0.00 |
| TRINITY_DN90431_c1_g1_i2  | SAMN1 | 1.37  | 5.90   | -2.17 | 0.00 |
| TRINITY_DN90431_c1_g1_i3  | SAMN1 | 0.98  | 2.35   | -1.28 | 0.00 |
| TRINITY_DN90450_c6_g2_i3  | F213A | 1.90  | 5.33   | -1.57 | 0.00 |
| TRINITY_DN90455_c5_g2_i1  |       | 14.52 | 3.73   | 2.00  | 0.00 |
| TRINITY_DN90482_c3_g1_i1  |       | 3.14  | 6.46   | -1.05 | 0.00 |
| TRINITY_DN90482_c5_g1_i13 | PLA2R | 0.34  | 11.09  | -4.95 | 0.00 |
| TRINITY_DN90484_c5_g2_i1  |       | 0.20  | 1.36   | -2.82 | 0.00 |
| TRINITY_DN90506_c7_g1_i1  |       | 0.98  | 7.48   | -2.85 | 0.00 |
| TRINITY_DN90507_c6_g2_i1  | GIMA7 | 3.44  | 8.51   | -1.30 | 0.00 |
| TRINITY_DN90507_c6_g3_i1  |       | 4.42  | 19.04  | -2.07 | 0.00 |
| TRINITY_DN90527_c0_g3_i1  | GIMA4 | 4.07  | 11.71  | -1.56 | 0.00 |
| TRINITY_DN90527_c0_g4_i1  | GIMA5 | 4.09  | 19.41  | -2.29 | 0.00 |
| TRINITY_DN90539_c4_g1_i3  |       | 11.60 | 30.48  | -1.39 | 0.00 |
| TRINITY_DN90544_c0_g1_i3  |       | 0.76  | 0.05   | 4.08  | 0.00 |
| TRINITY_DN90546_c1_g1_i4  |       | 39.97 | 111.29 | -1.51 | 0.00 |
| TRINITY_DN90569_c7_g1_i1  |       | 3.13  | 5.73   | -0.90 | 0.00 |
| TRINITY_DN90576_c2_g2_i2  |       | 0.60  | 10.75  | -4.15 | 0.00 |
| TRINITY_DN90579_c0_g1_i2  | LEG   | 79.63 | 26.87  | 1.63  | 0.00 |
| TRINITY_DN90586_c0_g1_i1  | MYO1B | 3.83  | 1.84   | 1.05  | 0.00 |
| TRINITY_DN90597_c9_g2_i4  |       | 3.93  | 34.03  | -3.28 | 0.00 |
| TRINITY_DN90610_c0_g2_i4  | PL8L1 | 3.03  | 9.57   | -1.68 | 0.00 |
| TRINITY_DN90621_c11_g2_i1 |       | 0.57  | 4.56   | -2.95 | 0.00 |
| TRINITY_DN90624_c0_g1_i1  | PPDPF | 24.90 | 3.50   | 2.86  | 0.00 |



|                           |       |        |        |       |      |
|---------------------------|-------|--------|--------|-------|------|
| TRINITY_DN90641_c1_g2_i3  | LICAM | 0.25   | 1.14   | -2.20 | 0.00 |
| TRINITY_DN90654_c0_g2_i3  | MYL6  | 54.42  | 28.29  | 0.96  | 0.00 |
| TRINITY_DN90658_c1_g1_i3  |       | 0.85   | 8.52   | -3.24 | 0.00 |
| TRINITY_DN90665_c6_g1_i2  |       | 1.42   | 0.13   | 3.48  | 0.00 |
| TRINITY_DN90669_c4_g1_i4  |       | 2.16   | 32.87  | -3.91 | 0.00 |
| TRINITY_DN90677_c3_g3_i1  |       | 0.00   | 1.56   | -4.15 | 0.00 |
| TRINITY_DN90686_c1_g1_i5  | LYG   | 7.09   | 21.05  | -1.62 | 0.00 |
| TRINITY_DN90696_c0_g4_i2  |       | 0.33   | 2.16   | -2.71 | 0.00 |
| TRINITY_DN90697_c3_g1_i3  |       | 0.13   | 1.60   | -3.36 | 0.00 |
| TRINITY_DN90700_c0_g5_i1  |       | 46.76  | 84.28  | -0.88 | 0.00 |
| TRINITY_DN90707_c2_g1_i1  | HINT1 | 0.40   | 3.54   | -3.24 | 0.00 |
| TRINITY_DN90716_c1_g1_i13 |       | 1.03   | 11.35  | -3.07 | 0.00 |
| TRINITY_DN90731_c8_g1_i1  |       | 0.59   | 1.86   | -1.70 | 0.00 |
| TRINITY_DN90742_c1_g1_i6  |       | 6.17   | 0.22   | 4.84  | 0.00 |
| TRINITY_DN90747_c11_g1_i2 |       | 9.64   | 34.12  | -1.76 | 0.00 |
| TRINITY_DN90747_c12_g6_i1 |       | 0.36   | 2.48   | -3.03 | 0.00 |
| TRINITY_DN90748_c4_g1_i1  |       | 0.18   | 2.30   | -3.33 | 0.00 |
| TRINITY_DN90751_c10_g1_i1 | TVB2  | 0.26   | 2.52   | -3.47 | 0.00 |
| TRINITY_DN90751_c9_g1_i1  |       | 4.51   | 20.81  | -2.23 | 0.00 |
| TRINITY_DN90755_c0_g3_i2  |       | 0.08   | 0.99   | -3.67 | 0.00 |
| TRINITY_DN90755_c0_g3_i3  |       | 2.68   | 0.72   | 1.90  | 0.00 |
| TRINITY_DN90755_c0_g7_i1  |       | 0.35   | 3.83   | -3.49 | 0.00 |
| TRINITY_DN90759_c0_g2_i4  | DAAM1 | 0.00   | 1.46   | -6.86 | 0.00 |
| TRINITY_DN90771_c7_g1_i8  |       | 0.67   | 0.00   | 4.41  | 0.00 |
| TRINITY_DN90772_c3_g1_i1  |       | 3.95   | 346.90 | -6.33 | 0.00 |
| TRINITY_DN90772_c3_g1_i10 |       | 1.70   | 239.55 | -6.87 | 0.00 |
| TRINITY_DN90772_c3_g1_i15 |       | 7.55   | 443.35 | -5.80 | 0.00 |
| TRINITY_DN90772_c3_g1_i17 |       | 0.22   | 12.52  | -5.44 | 0.00 |
| TRINITY_DN90772_c3_g1_i8  |       | 0.67   | 56.53  | -5.82 | 0.00 |
| TRINITY_DN90773_c1_g1_i6  | GP171 | 0.93   | 5.73   | -2.66 | 0.00 |
| TRINITY_DN90776_c0_g2_i10 | NDUS2 | 4.35   | 12.74  | -1.58 | 0.00 |
| TRINITY_DN90787_c0_g6_i1  |       | 11.66  | 4.55   | 1.34  | 0.00 |
| TRINITY_DN90795_c4_g1_i1  |       | 0.30   | 9.46   | -3.68 | 0.00 |
| TRINITY_DN90806_c0_g1_i2  | LAP4A | 13.59  | 8.21   | 0.78  | 0.00 |
| TRINITY_DN90823_c9_g1_i1  | RTBS  | 4.17   | 0.20   | 3.82  | 0.00 |
| TRINITY_DN90825_c1_g1_i4  | ACTN1 | 5.61   | 3.20   | 0.81  | 0.00 |
| TRINITY_DN90833_c0_g2_i5  |       | 9.15   | 1.03   | 3.13  | 0.00 |
| TRINITY_DN90838_c2_g3_i1  |       | 0.58   | 254.18 | -8.24 | 0.00 |
| TRINITY_DN90846_c3_g1_i6  |       | 1.87   | 17.90  | -3.23 | 0.00 |
| TRINITY_DN90846_c3_g2_i1  |       | 143.56 | 425.37 | -1.63 | 0.00 |
| TRINITY_DN90859_c11_g1_i4 |       | 0.00   | 4.86   | -3.98 | 0.00 |
| TRINITY_DN90884_c9_g1_i1  |       | 9.01   | 32.72  | -1.85 | 0.00 |

|                           |       |        |        |       |      |
|---------------------------|-------|--------|--------|-------|------|
| TRINITY_DN90892_c2_g1_i3  |       | 0.39   | 3.62   | -3.30 | 0.00 |
| TRINITY_DN90901_c6_g2_i5  |       | 0.84   | 6.97   | -2.98 | 0.00 |
| TRINITY_DN90905_c6_g1_i1  |       | 0.00   | 2.24   | -5.23 | 0.00 |
| TRINITY_DN90912_c1_g2_i9  | OTOAN | 0.14   | 3.37   | -4.62 | 0.00 |
| TRINITY_DN90922_c10_g1_i1 | GMFG  | 5.52   | 13.24  | -1.23 | 0.00 |
| TRINITY_DN90922_c10_g1_i4 | GMFG  | 16.94  | 37.66  | -1.13 | 0.00 |
| TRINITY_DN90940_c4_g2_i1  |       | 18.47  | 6.17   | 1.53  | 0.00 |
| TRINITY_DN90944_c2_g1_i1  | HG2A  | 0.73   | 3.36   | -2.22 | 0.00 |
| TRINITY_DN90944_c2_g1_i4  | HG2A  | 163.45 | 431.25 | -1.36 | 0.00 |
| TRINITY_DN90976_c9_g1_i3  |       | 0.05   | 0.92   | -4.17 | 0.00 |
| TRINITY_DN91001_c2_g2_i1  | R213A | 1.30   | 3.72   | -1.54 | 0.00 |
| TRINITY_DN91007_c0_g1_i1  |       | 0.10   | 2.67   | -4.06 | 0.00 |
| TRINITY_DN91032_c1_g1_i7  | CATB  | 83.01  | 135.57 | -0.75 | 0.00 |
| TRINITY_DN91057_c0_g2_i2  |       | 3.33   | 0.93   | 1.86  | 0.00 |
| TRINITY_DN91078_c2_g2_i1  |       | 17.87  | 1.83   | 3.21  | 0.00 |
| TRINITY_DN91099_c4_g2_i4  | KAP1  | 0.95   | 2.60   | -1.48 | 0.00 |
| TRINITY_DN91101_c10_g1_i5 | RIPK4 | 4.23   | 8.09   | -0.93 | 0.00 |
| TRINITY_DN91129_c0_g1_i3  |       | 2.62   | 0.08   | 4.56  | 0.00 |
| TRINITY_DN91142_c0_g1_i2  | HVM16 | 0.31   | 14.91  | -5.46 | 0.00 |
| TRINITY_DN91142_c0_g1_i7  | HV02  | 0.00   | 5.16   | -5.11 | 0.00 |
| TRINITY_DN91142_c0_g8_i1  | HVM43 | 0.13   | 9.58   | -5.26 | 0.00 |
| TRINITY_DN91143_c2_g1_i1  | CCL4  | 4.16   | 9.95   | -1.33 | 0.00 |
| TRINITY_DN91144_c5_g4_i2  |       | 0.47   | 3.34   | -2.82 | 0.00 |
| TRINITY_DN91148_c0_g1_i2  | OCSTP | 0.04   | 3.45   | -5.81 | 0.00 |
| TRINITY_DN91154_c4_g1_i1  | OSTF1 | 19.93  | 28.69  | -0.56 | 0.00 |
| TRINITY_DN91156_c1_g1_i4  |       | 1.38   | 14.17  | -3.84 | 0.00 |
| TRINITY_DN91157_c0_g1_i2  | CAN2  | 5.98   | 14.06  | -1.26 | 0.00 |
| TRINITY_DN91158_c10_g1_i1 |       | 0.87   | 4.45   | -2.32 | 0.00 |
| TRINITY_DN91164_c6_g1_i1  |       | 3.58   | 9.73   | -1.46 | 0.00 |
| TRINITY_DN91168_c0_g1_i7  |       | 0.53   | 6.05   | -3.58 | 0.00 |
| TRINITY_DN91168_c0_g2_i3  |       | 23.56  | 69.02  | -1.59 | 0.00 |
| TRINITY_DN91183_c3_g1_i2  |       | 2.59   | 0.00   | 5.34  | 0.00 |
| TRINITY_DN91190_c5_g1_i3  |       | 1.31   | 4.96   | -2.01 | 0.00 |
| TRINITY_DN91190_c6_g1_i2  | SOX4  | 0.53   | 1.50   | -1.51 | 0.00 |
| TRINITY_DN91193_c4_g2_i2  |       | 0.08   | 2.94   | -4.89 | 0.00 |
| TRINITY_DN91245_c0_g1_i1  |       | 7.24   | 2.00   | 1.88  | 0.00 |
| TRINITY_DN91257_c1_g1_i1  |       | 3.29   | 0.96   | 1.72  | 0.00 |
| TRINITY_DN91261_c3_g1_i1  |       | 0.70   | 9.90   | -3.70 | 0.00 |
| TRINITY_DN91261_c3_g2_i1  |       | 0.09   | 2.87   | -3.99 | 0.00 |
| TRINITY_DN91261_c3_g2_i2  |       | 10.23  | 254.48 | -4.54 | 0.00 |
| TRINITY_DN91263_c8_g1_i1  |       | 3.26   | 12.94  | -1.97 | 0.00 |
| TRINITY_DN91269_c0_g1_i4  |       | 1.63   | 0.16   | 3.56  | 0.00 |

|                           |       |         |        |        |      |
|---------------------------|-------|---------|--------|--------|------|
| TRINITY_DN91286_c0_g1_i14 | NED4L | 0.60    | 0.00   | 6.03   | 0.00 |
| TRINITY_DN91287_c10_g1_i1 |       | 1632.39 | 540.81 | 1.61   | 0.00 |
| TRINITY_DN91302_c5_g2_i5  | FYB   | 2.19    | 8.49   | -1.98  | 0.00 |
| TRINITY_DN91304_c0_g2_i2  | ARHGC | 3.42    | 20.52  | -2.62  | 0.00 |
| TRINITY_DN91308_c1_g5_i1  |       | 19.28   | 4.65   | 2.06   | 0.00 |
| TRINITY_DN91316_c0_g1_i1  | CXCR4 | 7.64    | 18.42  | -1.29  | 0.00 |
| TRINITY_DN91333_c7_g1_i1  |       | 0.26    | 2.58   | -3.67  | 0.00 |
| TRINITY_DN91338_c1_g1_i14 | ION3  | 443.48  | 146.10 | 1.65   | 0.00 |
| TRINITY_DN91339_c5_g2_i1  | CLDY  | 42.87   | 89.86  | -1.10  | 0.00 |
| TRINITY_DN91339_c6_g2_i1  | CLD4  | 1.04    | 26.01  | -4.48  | 0.00 |
| TRINITY_DN91339_c6_g3_i1  | CLDY  | 66.04   | 126.62 | -1.00  | 0.00 |
| TRINITY_DN91340_c3_g3_i1  |       | 1.45    | 12.51  | -3.38  | 0.00 |
| TRINITY_DN91341_c0_g1_i3  | ADCY4 | 0.92    | 4.70   | -2.41  | 0.00 |
| TRINITY_DN91341_c1_g1_i2  |       | 4.82    | 12.67  | -1.38  | 0.00 |
| TRINITY_DN91342_c0_g8_i3  | TPM4  | 12.27   | 6.18   | 0.96   | 0.00 |
| TRINITY_DN91347_c1_g1_i2  | GRAK  | 2.67    | 9.56   | -1.88  | 0.00 |
| TRINITY_DN91347_c2_g1_i3  |       | 2.27    | 9.33   | -2.06  | 0.00 |
| TRINITY_DN91347_c3_g3_i2  |       | 73.80   | 28.89  | 1.35   | 0.00 |
| TRINITY_DN91356_c2_g7_i1  |       | 5.19    | 2.62   | 0.98   | 0.00 |
| TRINITY_DN91364_c13_g1_i1 |       | 9.39    | 24.63  | -1.44  | 0.00 |
| TRINITY_DN91364_c13_g2_i4 | MPEG1 | 0.00    | 28.35  | -25.52 | 0.00 |
| TRINITY_DN91370_c2_g2_i2  | IL17F | 0.17    | 5.22   | -4.98  | 0.00 |
| TRINITY_DN91380_c4_g1_i1  |       | 0.79    | 6.57   | -3.11  | 0.00 |
| TRINITY_DN91388_c0_g1_i1  |       | 4.30    | 0.25   | 4.06   | 0.00 |
| TRINITY_DN91388_c0_g1_i3  |       | 0.00    | 3.20   | -6.51  | 0.00 |
| TRINITY_DN91401_c0_g3_i1  | FIBIN | 8.01    | 4.20   | 0.93   | 0.00 |
| TRINITY_DN91412_c5_g1_i1  |       | 0.20    | 5.95   | -5.02  | 0.00 |
| TRINITY_DN91423_c3_g2_i2  | FLOT2 | 0.00    | 1.90   | -5.19  | 0.00 |
| TRINITY_DN91436_c0_g1_i3  |       | 4.13    | 22.88  | -2.43  | 0.00 |
| TRINITY_DN91441_c6_g1_i1  |       | 0.13    | 1.59   | -3.62  | 0.00 |
| TRINITY_DN91455_c3_g1_i5  | DESP  | 8.91    | 3.28   | 1.41   | 0.00 |
| TRINITY_DN91460_c0_g1_i2  | S38A3 | 0.16    | 1.41   | -3.08  | 0.00 |
| TRINITY_DN91478_c6_g3_i1  |       | 0.08    | 3.75   | -4.19  | 0.00 |
| TRINITY_DN91481_c12_g3_i1 |       | 10.05   | 44.34  | -2.08  | 0.00 |
| TRINITY_DN91501_c4_g6_i2  | CAZA2 | 3.23    | 0.15   | 4.92   | 0.00 |
| TRINITY_DN91516_c3_g1_i3  | AP1S3 | 2.85    | 8.94   | -1.69  | 0.00 |
| TRINITY_DN91517_c1_g1_i1  | GILT  | 0.65    | 5.77   | -4.15  | 0.00 |
| TRINITY_DN91517_c1_g1_i2  | GILT  | 44.75   | 183.88 | -2.02  | 0.00 |
| TRINITY_DN91517_c1_g2_i2  | GILT  | 17.46   | 39.47  | -1.14  | 0.00 |
| TRINITY_DN91526_c3_g2_i11 | DOCK2 | 4.17    | 9.82   | -1.23  | 0.00 |
| TRINITY_DN91526_c3_g2_i15 | DOCK2 | 1.01    | 4.46   | -2.15  | 0.00 |
| TRINITY_DN91526_c3_g2_i4  | DOCK2 | 0.23    | 0.96   | -2.11  | 0.00 |

|                           |       |        |        |       |      |
|---------------------------|-------|--------|--------|-------|------|
| TRINITY_DN91528_c3_g1_i1  | TMLH  | 0.00   | 1.11   | -5.82 | 0.00 |
| TRINITY_DN91549_c4_g1_i1  |       | 2.39   | 0.00   | 4.99  | 0.00 |
| TRINITY_DN91549_c5_g1_i3  |       | 2.81   | 0.30   | 2.93  | 0.00 |
| TRINITY_DN91561_c4_g1_i1  | CCR6  | 0.33   | 3.33   | -3.50 | 0.00 |
| TRINITY_DN91561_c4_g1_i2  | CCR6  | 0.01   | 1.77   | -5.29 | 0.00 |
| TRINITY_DN91561_c4_g1_i4  | CCR6  | 0.57   | 7.00   | -3.55 | 0.00 |
| TRINITY_DN91578_c6_g1_i2  |       | 0.13   | 1.10   | -3.07 | 0.00 |
| TRINITY_DN91582_c0_g1_i1  |       | 1.80   | 35.76  | -4.44 | 0.00 |
| TRINITY_DN91582_c8_g2_i1  |       | 1.57   | 50.20  | -4.98 | 0.00 |
| TRINITY_DN91582_c8_g2_i2  |       | 1.98   | 27.39  | -3.93 | 0.00 |
| TRINITY_DN91582_c8_g6_i1  |       | 2.43   | 45.94  | -4.24 | 0.00 |
| TRINITY_DN91585_c3_g3_i7  | XBP1  | 23.98  | 13.23  | 0.91  | 0.00 |
| TRINITY_DN91593_c0_g3_i3  | K1C13 | 8.42   | 1.56   | 2.48  | 0.00 |
| TRINITY_DN91595_c1_g3_i1  | CD248 | 2.06   | 0.95   | 1.08  | 0.00 |
| TRINITY_DN91601_c8_g5_i1  |       | 1.14   | 7.09   | -2.63 | 0.00 |
| TRINITY_DN91616_c2_g1_i4  |       | 0.35   | 1.96   | -2.58 | 0.00 |
| TRINITY_DN91618_c1_g3_i1  |       | 1.11   | 2.79   | -1.32 | 0.00 |
| TRINITY_DN91626_c0_g1_i3  | PMEL  | 1.36   | 0.10   | 4.03  | 0.00 |
| TRINITY_DN91636_c1_g3_i1  |       | 10.27  | 0.52   | 3.53  | 0.00 |
| TRINITY_DN91637_c1_g1_i6  | SBP2L | 0.00   | 1.09   | -6.44 | 0.00 |
| TRINITY_DN91637_c1_g4_i1  |       | 4.11   | 22.51  | -2.46 | 0.00 |
| TRINITY_DN91639_c1_g1_i1  | DGKD  | 0.21   | 3.97   | -4.24 | 0.00 |
| TRINITY_DN91652_c2_g2_i1  |       | 50.10  | 22.30  | 1.27  | 0.00 |
| TRINITY_DN91694_c3_g1_i3  | F13A  | 11.46  | 3.05   | 1.90  | 0.00 |
| TRINITY_DN91703_c13_g2_i2 | ENTP2 | 2.31   | 4.90   | -1.12 | 0.00 |
| TRINITY_DN91705_c1_g1_i9  |       | 153.98 | 251.19 | -0.72 | 0.00 |
| TRINITY_DN91712_c13_g1_i1 |       | 6.87   | 21.98  | -1.67 | 0.00 |
| TRINITY_DN91712_c5_g1_i1  |       | 94.27  | 39.48  | 1.24  | 0.00 |
| TRINITY_DN91718_c0_g4_i2  |       | 2.25   | 0.55   | 2.03  | 0.00 |
| TRINITY_DN91743_c3_g2_i1  | CML1  | 0.20   | 0.84   | -2.13 | 0.00 |
| TRINITY_DN91743_c3_g3_i1  |       | 0.04   | 1.02   | -3.61 | 0.00 |
| TRINITY_DN91760_c3_g2_i3  |       | 160.74 | 84.55  | 0.93  | 0.00 |
| TRINITY_DN91773_c0_g1_i3  |       | 0.00   | 4.59   | -6.89 | 0.00 |
| TRINITY_DN91788_c3_g4_i1  | IL2RG | 9.28   | 29.57  | -1.70 | 0.00 |
| TRINITY_DN91791_c13_g1_i1 | HINT3 | 0.33   | 2.13   | -2.52 | 0.00 |
| TRINITY_DN91793_c8_g1_i1  | ENDUC | 9.57   | 20.81  | -1.16 | 0.00 |
| TRINITY_DN91794_c5_g1_i2  | VG87  | 41.57  | 64.55  | -0.67 | 0.00 |
| TRINITY_DN91795_c0_g1_i2  | M3K8  | 0.69   | 3.41   | -2.36 | 0.00 |
| TRINITY_DN91796_c2_g1_i6  | TGFI1 | 5.03   | 2.45   | 1.01  | 0.00 |
| TRINITY_DN91806_c6_g3_i2  | GRT1A | 0.72   | 2.88   | -1.98 | 0.00 |
| TRINITY_DN91811_c1_g2_i8  | TRI25 | 0.00   | 2.38   | -6.44 | 0.00 |
| TRINITY_DN91812_c7_g1_i1  |       | 0.57   | 4.33   | -3.03 | 0.00 |

|                           |       |        |        |        |      |
|---------------------------|-------|--------|--------|--------|------|
| TRINITY_DN91815_c1_g3_i3  |       | 1.53   | 3.23   | -1.04  | 0.00 |
| TRINITY_DN91824_c3_g2_i2  | GMPPB | 7.27   | 0.49   | 3.76   | 0.00 |
| TRINITY_DN91824_c5_g3_i1  |       | 54.76  | 29.17  | 0.90   | 0.00 |
| TRINITY_DN91824_c5_g4_i1  |       | 6.70   | 22.13  | -1.74  | 0.00 |
| TRINITY_DN91829_c7_g2_i1  |       | 3.76   | 8.56   | -1.17  | 0.00 |
| TRINITY_DN91845_c0_g1_i4  | CACO2 | 0.00   | 1.19   | -5.40  | 0.00 |
| TRINITY_DN91845_c0_g4_i1  |       | 0.60   | 5.18   | -3.19  | 0.00 |
| TRINITY_DN91851_c9_g1_i2  |       | 0.68   | 3.42   | -2.38  | 0.00 |
| TRINITY_DN91853_c0_g1_i3  | IRF4  | 0.11   | 0.92   | -3.24  | 0.00 |
| TRINITY_DN91853_c0_g1_i6  | IRF4  | 0.00   | 0.38   | -4.19  | 0.00 |
| TRINITY_DN91874_c0_g1_i2  | SPAT2 | 2.14   | 4.85   | -1.16  | 0.00 |
| TRINITY_DN91878_c1_g1_i3  | TNNI1 | 2.01   | 8.92   | -2.19  | 0.00 |
| TRINITY_DN91887_c6_g1_i6  |       | 0.08   | 2.70   | -4.58  | 0.00 |
| TRINITY_DN91893_c3_g1_i10 | RGS1  | 0.00   | 1.19   | -5.64  | 0.00 |
| TRINITY_DN91893_c3_g1_i11 | RGS1  | 1.90   | 12.89  | -2.77  | 0.00 |
| TRINITY_DN91893_c3_g1_i13 | RGS21 | 1.57   | 12.08  | -3.01  | 0.00 |
| TRINITY_DN91893_c3_g1_i14 | RGS5  | 0.47   | 3.53   | -2.93  | 0.00 |
| TRINITY_DN91893_c3_g1_i2  | RGS21 | 0.00   | 1.05   | -5.37  | 0.00 |
| TRINITY_DN91893_c3_g1_i3  | RGS1  | 0.00   | 1.55   | -5.69  | 0.00 |
| TRINITY_DN91893_c3_g1_i4  | RGS2  | 4.79   | 24.25  | -2.29  | 0.00 |
| TRINITY_DN91893_c3_g1_i6  | RGS2  | 16.17  | 88.93  | -2.50  | 0.00 |
| TRINITY_DN91897_c2_g1_i1  |       | 8.11   | 21.21  | -1.35  | 0.00 |
| TRINITY_DN91922_c0_g4_i1  |       | 0.23   | 3.59   | -3.93  | 0.00 |
| TRINITY_DN91922_c0_g4_i4  | AGRG1 | 0.96   | 8.93   | -3.29  | 0.00 |
| TRINITY_DN91922_c0_g4_i5  |       | 0.06   | 2.76   | -5.17  | 0.00 |
| TRINITY_DN91932_c4_g1_i7  | DLRB2 | 0.37   | 0.00   | 4.48   | 0.00 |
| TRINITY_DN91940_c4_g2_i7  | ISK1  | 3.77   | 14.51  | -1.96  | 0.00 |
| TRINITY_DN91960_c5_g1_i3  |       | 2.70   | 9.50   | -1.83  | 0.00 |
| TRINITY_DN91964_c0_g1_i9  | CCR7  | 2.96   | 8.72   | -1.64  | 0.00 |
| TRINITY_DN91991_c4_g1_i2  |       | 19.66  | 6.52   | 1.82   | 0.00 |
| TRINITY_DN91992_c10_g1_i1 |       | 1.37   | 7.40   | -2.39  | 0.00 |
| TRINITY_DN92008_c1_g1_i3  | NRK2  | 47.29  | 22.48  | 1.08   | 0.00 |
| TRINITY_DN92008_c1_g1_i6  | NRK2  | 222.83 | 154.26 | 0.57   | 0.00 |
| TRINITY_DN92014_c4_g1_i1  |       | 0.35   | 2.84   | -2.96  | 0.00 |
| TRINITY_DN92018_c2_g2_i5  | TMM54 | 0.00   | 9.31   | -23.24 | 0.00 |
| TRINITY_DN92024_c1_g1_i9  | MCF2L | 0.19   | 1.78   | -3.23  | 0.00 |
| TRINITY_DN92026_c2_g2_i9  | PARP9 | 3.69   | 7.82   | -1.09  | 0.00 |
| TRINITY_DN92031_c1_g1_i1  |       | 0.16   | 1.63   | -3.40  | 0.00 |
| TRINITY_DN92034_c10_g1_i5 |       | 1.80   | 6.83   | -1.94  | 0.00 |
| TRINITY_DN92045_c2_g1_i1  | TT21B | 3.20   | 0.63   | 2.45   | 0.00 |
| TRINITY_DN92046_c2_g1_i6  | MRC2  | 0.26   | 9.11   | -5.17  | 0.00 |
| TRINITY_DN92046_c2_g1_i8  | LYAM1 | 0.00   | 1.22   | -4.81  | 0.00 |

|                           |       |        |        |       |      |
|---------------------------|-------|--------|--------|-------|------|
| TRINITY_DN92065_c7_g1_i3  | CNFNB | 0.00   | 3.33   | -6.39 | 0.00 |
| TRINITY_DN92086_c4_g1_i2  |       | 0.04   | 4.80   | -5.98 | 0.00 |
| TRINITY_DN92087_c1_g1_i15 | RHOF  | 1.44   | 5.27   | -1.92 | 0.00 |
| TRINITY_DN92089_c9_g1_i1  | ROA2  | 0.70   | 18.02  | -4.57 | 0.00 |
| TRINITY_DN92120_c7_g1_i1  | ABCF2 | 0.49   | 1.53   | -1.67 | 0.00 |
| TRINITY_DN92124_c2_g1_i4  |       | 0.34   | 8.67   | -4.78 | 0.00 |
| TRINITY_DN92134_c7_g1_i1  |       | 0.59   | 2.42   | -2.07 | 0.00 |
| TRINITY_DN92138_c0_g2_i1  |       | 30.98  | 1.50   | 4.16  | 0.00 |
| TRINITY_DN92140_c0_g1_i3  | IF44L | 9.59   | 17.47  | -0.87 | 0.00 |
| TRINITY_DN92170_c6_g1_i5  | DI2BA | 0.00   | 1.25   | -4.44 | 0.00 |
| TRINITY_DN92193_c10_g2_i1 |       | 17.74  | 79.49  | -2.23 | 0.00 |
| TRINITY_DN92193_c10_g2_i2 |       | 6.07   | 22.99  | -2.00 | 0.00 |
| TRINITY_DN92199_c2_g1_i1  |       | 3.36   | 20.93  | -2.81 | 0.00 |
| TRINITY_DN92215_c2_g1_i1  | PAR14 | 9.38   | 23.30  | -1.34 | 0.00 |
| TRINITY_DN92220_c4_g1_i1  |       | 1.66   | 5.49   | -1.80 | 0.00 |
| TRINITY_DN92227_c2_g1_i1  |       | 1.72   | 4.91   | -1.53 | 0.00 |
| TRINITY_DN92227_c3_g3_i2  | TR11B | 0.17   | 4.29   | -4.64 | 0.00 |
| TRINITY_DN92241_c11_g1_i9 |       | 0.13   | 2.20   | -4.10 | 0.00 |
| TRINITY_DN92254_c0_g1_i8  | IKBA  | 39.31  | 79.10  | -0.99 | 0.00 |
| TRINITY_DN92258_c0_g1_i3  | HMR1  | 0.02   | 1.38   | -4.79 | 0.00 |
| TRINITY_DN92279_c8_g1_i1  |       | 8.33   | 31.11  | -1.99 | 0.00 |
| TRINITY_DN92280_c0_g1_i2  | BRYP  | 273.71 | 166.32 | 0.74  | 0.00 |
| TRINITY_DN92280_c0_g3_i1  |       | 16.17  | 0.00   | 5.39  | 0.00 |
| TRINITY_DN92290_c3_g3_i7  | SCAM1 | 1.24   | 4.75   | -1.92 | 0.00 |
| TRINITY_DN92291_c4_g1_i1  | CNMD  | 6.34   | 1.83   | 1.79  | 0.00 |
| TRINITY_DN92292_c5_g1_i1  | A33   | 1.51   | 4.56   | -1.57 | 0.00 |
| TRINITY_DN92299_c4_g1_i2  |       | 2.74   | 12.33  | -2.17 | 0.00 |
| TRINITY_DN92317_c1_g2_i1  |       | 27.81  | 111.99 | -2.01 | 0.00 |
| TRINITY_DN92321_c0_g1_i5  | IKBE  | 0.32   | 2.10   | -2.72 | 0.00 |
| TRINITY_DN92321_c0_g1_i7  | IKBE  | 1.83   | 7.74   | -2.09 | 0.00 |
| TRINITY_DN92328_c5_g2_i4  | SAP   | 34.11  | 57.20  | -0.77 | 0.00 |
| TRINITY_DN92334_c2_g1_i4  | EFC4B | 0.84   | 2.53   | -1.57 | 0.00 |
| TRINITY_DN92338_c0_g1_i3  | TBCC1 | 0.78   | 0.05   | 3.98  | 0.00 |
| TRINITY_DN92367_c0_g1_i7  | PLOD1 | 1.03   | 0.17   | 2.56  | 0.00 |
| TRINITY_DN92379_c0_g1_i5  | JAK1  | 0.02   | 1.36   | -5.50 | 0.00 |
| TRINITY_DN92381_c0_g1_i12 |       | 0.42   | 8.31   | -3.58 | 0.00 |
| TRINITY_DN92381_c0_g1_i14 | CCL13 | 1.86   | 12.19  | -2.72 | 0.00 |
| TRINITY_DN92381_c0_g1_i2  | CCL13 | 19.28  | 0.83   | 4.59  | 0.00 |
| TRINITY_DN92381_c0_g1_i4  |       | 8.74   | 67.93  | -2.93 | 0.00 |
| TRINITY_DN92384_c6_g1_i3  | DOK1  | 4.63   | 8.20   | -0.85 | 0.00 |
| TRINITY_DN92395_c3_g1_i10 | SASH3 | 4.07   | 12.32  | -1.63 | 0.00 |
| TRINITY_DN92395_c3_g1_i4  | SASH3 | 5.91   | 17.88  | -1.65 | 0.00 |

|                           |       |        |        |       |      |
|---------------------------|-------|--------|--------|-------|------|
| TRINITY_DN92406_c3_g1_i1  | CCR4  | 0.07   | 0.47   | -2.81 | 0.00 |
| TRINITY_DN92407_c5_g1_i4  | FA49B | 11.22  | 24.11  | -1.12 | 0.00 |
| TRINITY_DN92412_c2_g2_i1  | HA1K  | 0.68   | 457.76 | -9.48 | 0.00 |
| TRINITY_DN92412_c2_g3_i4  | HMR1  | 0.11   | 137.44 | -8.21 | 0.00 |
| TRINITY_DN92412_c4_g1_i1  | HMR1  | 1.67   | 54.60  | -5.17 | 0.00 |
| TRINITY_DN92419_c7_g1_i4  | RAB10 | 0.00   | 2.60   | -6.51 | 0.00 |
| TRINITY_DN92429_c0_g1_i1  | MPDZ  | 3.47   | 0.23   | 3.37  | 0.00 |
| TRINITY_DN92429_c3_g6_i1  |       | 1.03   | 8.70   | -3.05 | 0.00 |
| TRINITY_DN92443_c0_g2_i2  | MCRI1 | 9.00   | 15.07  | -0.77 | 0.00 |
| TRINITY_DN92485_c7_g6_i1  |       | 2.57   | 0.52   | 2.25  | 0.00 |
| TRINITY_DN92523_c4_g2_i16 | NKL   | 0.80   | 5.39   | -2.80 | 0.00 |
| TRINITY_DN92527_c3_g2_i1  | RHDF1 | 0.49   | 1.35   | -1.45 | 0.00 |
| TRINITY_DN92528_c1_g2_i2  | SEPT9 | 0.52   | 2.09   | -1.95 | 0.00 |
| TRINITY_DN92528_c1_g2_i5  | SEPT9 | 0.70   | 6.59   | -3.17 | 0.00 |
| TRINITY_DN92535_c4_g2_i1  |       | 2.50   | 11.26  | -2.15 | 0.00 |
| TRINITY_DN92535_c4_g2_i2  |       | 0.02   | 3.42   | -6.17 | 0.00 |
| TRINITY_DN92561_c4_g2_i7  |       | 0.21   | 2.66   | -3.55 | 0.00 |
| TRINITY_DN92562_c0_g4_i2  | RAB25 | 0.27   | 1.74   | -2.90 | 0.00 |
| TRINITY_DN92562_c0_g4_i4  | RAB25 | 0.00   | 16.79  | -9.29 | 0.00 |
| TRINITY_DN92565_c6_g2_i1  |       | 2.10   | 4.51   | -1.13 | 0.00 |
| TRINITY_DN92583_c5_g3_i2  |       | 1.04   | 9.13   | -3.22 | 0.00 |
| TRINITY_DN92585_c8_g4_i5  |       | 0.00   | 2.74   | -4.51 | 0.00 |
| TRINITY_DN92586_c5_g3_i1  | IF44L | 6.20   | 32.77  | -2.40 | 0.00 |
| TRINITY_DN92587_c6_g1_i1  |       | 0.17   | 1.57   | -3.11 | 0.00 |
| TRINITY_DN92605_c1_g1_i2  |       | 0.18   | 6.49   | -4.38 | 0.00 |
| TRINITY_DN92605_c1_g1_i5  |       | 3.86   | 11.88  | -1.57 | 0.00 |
| TRINITY_DN92605_c1_g2_i2  | CDHR1 | 5.73   | 0.39   | 3.98  | 0.00 |
| TRINITY_DN92609_c0_g1_i13 | COF2  | 185.77 | 329.04 | -0.86 | 0.00 |
| TRINITY_DN92625_c8_g3_i1  |       | 8.66   | 23.99  | -1.52 | 0.00 |
| TRINITY_DN92634_c5_g3_i2  |       | 12.64  | 0.55   | 4.36  | 0.00 |
| TRINITY_DN92653_c8_g2_i1  | TLR13 | 0.11   | 1.15   | -3.53 | 0.00 |
| TRINITY_DN92679_c4_g3_i1  |       | 0.15   | 1.31   | -3.15 | 0.00 |
| TRINITY_DN92687_c6_g1_i4  |       | 3.20   | 0.00   | 5.81  | 0.00 |
| TRINITY_DN92702_c3_g4_i2  | PL8L1 | 14.93  | 32.79  | -1.13 | 0.00 |
| TRINITY_DN92709_c4_g1_i1  |       | 0.60   | 2.49   | -2.14 | 0.00 |
| TRINITY_DN92722_c1_g1_i1  |       | 17.87  | 10.33  | 0.77  | 0.00 |
| TRINITY_DN92726_c0_g3_i3  |       | 4.94   | 2.36   | 1.08  | 0.00 |
| TRINITY_DN92733_c2_g2_i1  |       | 34.25  | 78.32  | -1.17 | 0.00 |
| TRINITY_DN92772_c0_g1_i5  | BCAR3 | 3.16   | 0.09   | 4.90  | 0.00 |
| TRINITY_DN92781_c5_g2_i2  |       | 0.07   | 0.83   | -3.58 | 0.00 |
| TRINITY_DN92794_c4_g3_i1  | MCT1A | 1.78   | 8.15   | -2.25 | 0.00 |
| TRINITY_DN92805_c9_g1_i8  | GSHB  | 6.44   | 2.61   | 1.33  | 0.00 |

|                           |       |       |        |       |      |
|---------------------------|-------|-------|--------|-------|------|
| TRINITY_DN92813_c0_g2_i4  | AGO1  | 0.91  | 0.32   | 1.49  | 0.00 |
| TRINITY_DN92816_c4_g2_i2  | HEBP2 | 47.64 | 22.40  | 1.11  | 0.00 |
| TRINITY_DN92818_c6_g6_i1  |       | 0.00  | 25.16  | -7.11 | 0.00 |
| TRINITY_DN92820_c1_g1_i3  | AIF1  | 36.69 | 105.60 | -1.55 | 0.00 |
| TRINITY_DN92820_c1_g3_i1  |       | 0.78  | 4.35   | -2.43 | 0.00 |
| TRINITY_DN92845_c7_g2_i2  | AL5AP | 9.12  | 21.73  | -1.26 | 0.00 |
| TRINITY_DN92864_c8_g4_i2  |       | 0.00  | 3.06   | -4.15 | 0.00 |
| TRINITY_DN92875_c5_g4_i1  |       | 0.13  | 2.99   | -4.33 | 0.00 |
| TRINITY_DN92885_c1_g1_i11 | RRP8  | 0.00  | 0.91   | -5.27 | 0.00 |
| TRINITY_DN92887_c1_g1_i6  | CDS2  | 0.02  | 0.89   | -4.47 | 0.00 |
| TRINITY_DN92893_c3_g1_i1  | TB10C | 1.31  | 5.28   | -1.93 | 0.00 |
| TRINITY_DN92894_c3_g1_i1  | GNA14 | 0.77  | 6.68   | -2.92 | 0.00 |
| TRINITY_DN92894_c3_g2_i1  | GNA14 | 1.39  | 6.20   | -2.15 | 0.00 |
| TRINITY_DN92894_c3_g2_i2  | GNA14 | 1.81  | 13.31  | -2.86 | 0.00 |
| TRINITY_DN92938_c0_g1_i5  | CRTAM | 0.10  | 2.56   | -4.57 | 0.00 |
| TRINITY_DN92938_c0_g1_i9  | CRTAM | 0.49  | 3.09   | -2.66 | 0.00 |
| TRINITY_DN92940_c8_g1_i2  | RPA12 | 6.14  | 1.53   | 2.07  | 0.00 |
| TRINITY_DN92946_c5_g2_i2  |       | 44.56 | 108.81 | -1.28 | 0.00 |
| TRINITY_DN92951_c0_g1_i1  | IKZF3 | 0.23  | 1.65   | -2.92 | 0.00 |
| TRINITY_DN92951_c0_g1_i3  | IKZF3 | 1.44  | 6.40   | -2.16 | 0.00 |
| TRINITY_DN92951_c0_g6_i2  |       | 0.61  | 5.54   | -3.13 | 0.00 |
| TRINITY_DN92966_c3_g3_i1  | NETR  | 0.17  | 1.35   | -3.00 | 0.00 |
| TRINITY_DN92972_c1_g2_i2  | GELS  | 8.53  | 4.32   | 0.99  | 0.00 |
| TRINITY_DN92978_c9_g1_i2  |       | 0.41  | 2.61   | -2.56 | 0.00 |
| TRINITY_DN92983_c6_g2_i1  |       | 2.41  | 9.80   | -2.11 | 0.00 |
| TRINITY_DN92987_c5_g1_i3  |       | 20.86 | 81.74  | -1.93 | 0.00 |
| TRINITY_DN92987_c5_g1_i6  |       | 6.41  | 40.64  | -2.65 | 0.00 |
| TRINITY_DN92987_c5_g2_i3  |       | 3.58  | 9.17   | -1.36 | 0.00 |
| TRINITY_DN92988_c10_g1_i2 |       | 8.41  | 0.41   | 3.87  | 0.00 |
| TRINITY_DN92992_c5_g1_i8  | ERAP2 | 0.57  | 1.76   | -1.57 | 0.00 |
| TRINITY_DN92996_c2_g1_i1  | CD226 | 0.88  | 3.47   | -1.99 | 0.00 |
| TRINITY_DN93002_c1_g2_i1  | CCL20 | 22.05 | 96.74  | -2.08 | 0.00 |
| TRINITY_DN93002_c1_g2_i6  | CCL20 | 0.00  | 21.41  | -7.68 | 0.00 |
| TRINITY_DN93017_c9_g1_i1  | SIAT2 | 0.32  | 1.78   | -2.50 | 0.00 |
| TRINITY_DN93021_c6_g1_i1  | NLRC3 | 0.36  | 2.24   | -2.71 | 0.00 |
| TRINITY_DN93025_c4_g2_i5  |       | 0.00  | 2.63   | -5.97 | 0.00 |
| TRINITY_DN93027_c8_g1_i1  | ASGR2 | 0.79  | 22.86  | -4.81 | 0.00 |
| TRINITY_DN93028_c0_g1_i3  | BROX  | 3.65  | 0.37   | 3.24  | 0.00 |
| TRINITY_DN93031_c4_g1_i10 |       | 1.34  | 15.00  | -3.17 | 0.00 |
| TRINITY_DN93031_c4_g1_i14 |       | 0.31  | 3.70   | -3.03 | 0.00 |
| TRINITY_DN93031_c4_g2_i2  |       | 2.59  | 31.26  | -3.51 | 0.00 |
| TRINITY_DN93034_c1_g1_i3  |       | 0.38  | 2.60   | -2.89 | 0.00 |



|                           |       |       |        |        |      |
|---------------------------|-------|-------|--------|--------|------|
| TRINITY_DN93040_c5_g3_i2  | ANTR1 | 2.09  | 0.02   | 5.87   | 0.00 |
| TRINITY_DN93060_c1_g1_i1  |       | 0.59  | 14.54  | -3.84  | 0.00 |
| TRINITY_DN93097_c4_g2_i2  | TTY2L | 0.24  | 1.14   | -2.28  | 0.00 |
| TRINITY_DN93100_c4_g1_i1  |       | 1.89  | 20.25  | -3.31  | 0.00 |
| TRINITY_DN93100_c8_g1_i2  |       | 54.33 | 142.59 | -1.30  | 0.00 |
| TRINITY_DN93100_c8_g1_i3  |       | 0.40  | 16.71  | -5.54  | 0.00 |
| TRINITY_DN93105_c6_g1_i1  | TC1A  | 5.88  | 39.92  | -2.74  | 0.00 |
| TRINITY_DN93125_c4_g2_i2  |       | 0.00  | 63.70  | -24.65 | 0.00 |
| TRINITY_DN93127_c2_g1_i9  |       | 0.00  | 2.08   | -4.70  | 0.00 |
| TRINITY_DN93135_c2_g5_i2  |       | 0.00  | 3.14   | -6.16  | 0.00 |
| TRINITY_DN93138_c4_g1_i3  | CCL4  | 2.73  | 8.07   | -1.57  | 0.00 |
| TRINITY_DN93138_c7_g1_i7  | HOIL1 | 2.27  | 4.82   | -1.08  | 0.00 |
| TRINITY_DN93141_c9_g1_i2  |       | 0.80  | 4.84   | -2.58  | 0.00 |
| TRINITY_DN93149_c0_g2_i1  | HOX71 | 6.39  | 3.72   | 0.76   | 0.00 |
| TRINITY_DN93159_c2_g3_i1  | NECT2 | 4.39  | 17.23  | -1.95  | 0.00 |
| TRINITY_DN93173_c0_g1_i8  |       | 0.30  | 2.83   | -3.33  | 0.00 |
| TRINITY_DN93176_c1_g1_i1  |       | 2.49  | 8.17   | -1.72  | 0.00 |
| TRINITY_DN93176_c4_g1_i1  |       | 8.06  | 1.58   | 2.24   | 0.00 |
| TRINITY_DN93179_c3_g1_i2  |       | 7.40  | 4.38   | 0.72   | 0.00 |
| TRINITY_DN93180_c7_g1_i1  |       | 2.66  | 83.71  | -4.97  | 0.00 |
| TRINITY_DN93182_c5_g6_i1  |       | 0.87  | 2.11   | -1.34  | 0.00 |
| TRINITY_DN93205_c1_g2_i7  | USTA  | 11.32 | 0.59   | 3.80   | 0.00 |
| TRINITY_DN93210_c8_g1_i3  | TC1A  | 0.82  | 5.32   | -2.82  | 0.00 |
| TRINITY_DN93217_c9_g1_i1  |       | 1.70  | 10.44  | -2.63  | 0.00 |
| TRINITY_DN93223_c2_g1_i1  | FLNA  | 48.31 | 29.31  | 0.72   | 0.00 |
| TRINITY_DN93223_c2_g1_i8  | FLNA  | 5.41  | 1.93   | 1.47   | 0.00 |
| TRINITY_DN93236_c6_g2_i1  |       | 2.30  | 0.76   | 1.57   | 0.00 |
| TRINITY_DN93236_c7_g1_i5  | MOG1  | 0.03  | 0.95   | -3.74  | 0.00 |
| TRINITY_DN93258_c2_g3_i8  |       | 0.17  | 3.19   | -4.29  | 0.00 |
| TRINITY_DN93258_c2_g3_i9  | PPHLN | 5.06  | 10.05  | -1.01  | 0.00 |
| TRINITY_DN93273_c0_g1_i10 | IRF1  | 23.99 | 66.53  | -1.44  | 0.00 |
| TRINITY_DN93273_c0_g1_i14 | IRF1  | 10.31 | 19.32  | -0.91  | 0.00 |
| TRINITY_DN93273_c0_g1_i15 | IRF1  | 7.45  | 19.75  | -1.43  | 0.00 |
| TRINITY_DN93273_c0_g1_i20 |       | 0.54  | 5.28   | -3.45  | 0.00 |
| TRINITY_DN93273_c0_g1_i6  | IRF1  | 0.53  | 13.98  | -4.67  | 0.00 |
| TRINITY_DN93273_c0_g1_i7  | IRF1  | 5.30  | 16.13  | -1.61  | 0.00 |
| TRINITY_DN93276_c3_g1_i1  |       | 7.50  | 3.38   | 1.17   | 0.00 |
| TRINITY_DN93284_c14_g1_i1 |       | 0.26  | 1.93   | -2.94  | 0.00 |
| TRINITY_DN93288_c4_g2_i1  |       | 0.08  | 1.83   | -3.93  | 0.00 |
| TRINITY_DN93293_c0_g2_i1  |       | 85.81 | 179.59 | -1.09  | 0.00 |
| TRINITY_DN93300_c1_g1_i1  |       | 48.12 | 80.64  | -0.76  | 0.00 |
| TRINITY_DN93301_c3_g1_i1  | PC11X | 0.02  | 1.49   | -4.64  | 0.00 |

|                           |       |       |       |       |      |
|---------------------------|-------|-------|-------|-------|------|
| TRINITY_DN93311_c2_g1_i1  | TSAC  | 4.70  | 18.90 | -2.02 | 0.00 |
| TRINITY_DN93311_c2_g1_i2  | TSAC  | 0.19  | 3.13  | -4.18 | 0.00 |
| TRINITY_DN93311_c2_g1_i3  | TSAC  | 0.00  | 0.75  | -5.37 | 0.00 |
| TRINITY_DN93328_c1_g6_i1  | CENPJ | 0.31  | 2.36  | -3.02 | 0.00 |
| TRINITY_DN93334_c0_g1_i3  | NEUA  | 0.00  | 1.93  | -6.82 | 0.00 |
| TRINITY_DN93344_c4_g1_i15 |       | 0.00  | 2.30  | -6.18 | 0.00 |
| TRINITY_DN93344_c4_g1_i16 |       | 1.41  | 11.91 | -3.05 | 0.00 |
| TRINITY_DN93344_c4_g2_i1  |       | 3.89  | 38.49 | -3.32 | 0.00 |
| TRINITY_DN93364_c1_g2_i1  |       | 4.62  | 17.57 | -1.97 | 0.00 |
| TRINITY_DN93364_c1_g3_i1  |       | 3.88  | 10.81 | -1.47 | 0.00 |
| TRINITY_DN93364_c1_g3_i2  |       | 3.99  | 12.55 | -1.64 | 0.00 |
| TRINITY_DN93365_c3_g3_i2  |       | 24.74 | 6.37  | 1.95  | 0.00 |
| TRINITY_DN93378_c2_g1_i8  | IL12B | 1.84  | 9.21  | -2.39 | 0.00 |
| TRINITY_DN93382_c4_g3_i1  | CX111 | 0.52  | 3.60  | -2.89 | 0.00 |
| TRINITY_DN93385_c3_g1_i3  |       | 28.82 | 6.98  | 1.96  | 0.00 |
| TRINITY_DN93421_c4_g1_i1  | HHLA2 | 0.28  | 6.63  | -4.45 | 0.00 |
| TRINITY_DN93421_c4_g1_i4  | VTCN1 | 8.78  | 26.41 | -1.61 | 0.00 |
| TRINITY_DN93431_c1_g1_i3  |       | 3.63  | 1.56  | 1.22  | 0.00 |
| TRINITY_DN93432_c11_g1_i1 |       | 0.90  | 2.12  | -1.20 | 0.00 |
| TRINITY_DN93448_c6_g2_i1  | GRN3  | 16.26 | 40.17 | -1.31 | 0.00 |
| TRINITY_DN93448_c6_g3_i2  | GRN   | 5.97  | 16.69 | -1.48 | 0.00 |
| TRINITY_DN93452_c0_g1_i1  | PLPP1 | 1.62  | 0.06  | 4.62  | 0.00 |
| TRINITY_DN93456_c6_g1_i6  |       | 49.36 | 4.22  | 3.45  | 0.00 |
| TRINITY_DN93457_c4_g2_i4  | HDAC6 | 1.56  | 0.00  | 6.29  | 0.00 |
| TRINITY_DN93457_c4_g2_i5  | HDAC6 | 0.39  | 4.46  | -3.49 | 0.00 |
| TRINITY_DN93478_c4_g1_i3  |       | 0.76  | 3.68  | -2.31 | 0.00 |
| TRINITY_DN93493_c8_g1_i6  | CTLA4 | 0.16  | 1.69  | -3.43 | 0.00 |
| TRINITY_DN93495_c0_g4_i2  |       | 17.75 | 6.24  | 1.53  | 0.00 |
| TRINITY_DN93500_c1_g3_i4  | K1C18 | 6.03  | 0.40  | 3.40  | 0.00 |
| TRINITY_DN93531_c7_g3_i1  |       | 17.05 | 43.65 | -1.38 | 0.00 |
| TRINITY_DN93539_c8_g1_i10 |       | 0.71  | 3.44  | -2.20 | 0.00 |
| TRINITY_DN93551_c1_g3_i8  | CBX3  | 0.13  | 3.65  | -4.70 | 0.00 |
| TRINITY_DN93551_c1_g3_i9  | CBX3  | 0.10  | 10.06 | -6.08 | 0.00 |
| TRINITY_DN93555_c6_g1_i2  |       | 0.23  | 8.83  | -3.56 | 0.00 |
| TRINITY_DN93569_c4_g1_i1  |       | 0.02  | 1.52  | -4.35 | 0.00 |
| TRINITY_DN93570_c1_g1_i1  |       | 5.48  | 2.80  | 0.94  | 0.00 |
| TRINITY_DN93576_c6_g1_i2  | GA45A | 2.95  | 6.87  | -1.23 | 0.00 |
| TRINITY_DN93579_c1_g1_i2  | FUT11 | 3.93  | 2.37  | 0.72  | 0.00 |
| TRINITY_DN93597_c0_g1_i2  |       | 0.02  | 3.05  | -5.73 | 0.00 |
| TRINITY_DN93613_c8_g1_i1  |       | 3.13  | 0.01  | 5.38  | 0.00 |
| TRINITY_DN93617_c0_g2_i1  | LYG   | 0.10  | 1.10  | -3.56 | 0.00 |
| TRINITY_DN93634_c0_g2_i5  | CRVP  | 88.35 | 15.78 | 2.41  | 0.00 |

|                           |       |        |       |       |      |
|---------------------------|-------|--------|-------|-------|------|
| TRINITY_DN93656_c2_g1_i2  | GMDS  | 23.11  | 42.60 | -0.93 | 0.00 |
| TRINITY_DN93663_c7_g1_i2  |       | 4.60   | 40.25 | -3.38 | 0.00 |
| TRINITY_DN93674_c7_g3_i2  |       | 3.05   | 0.30  | 3.35  | 0.00 |
| TRINITY_DN93676_c11_g1_i1 |       | 0.30   | 6.29  | -3.56 | 0.00 |
| TRINITY_DN93689_c3_g2_i1  |       | 5.18   | 25.77 | -2.46 | 0.00 |
| TRINITY_DN93701_c3_g2_i6  |       | 0.75   | 9.73  | -3.64 | 0.00 |
| TRINITY_DN93707_c3_g2_i5  | PTN18 | 2.00   | 5.85  | -1.60 | 0.00 |
| TRINITY_DN93707_c4_g2_i6  |       | 0.82   | 3.43  | -2.06 | 0.00 |
| TRINITY_DN93711_c2_g1_i1  |       | 4.60   | 11.93 | -1.32 | 0.00 |
| TRINITY_DN93716_c2_g1_i3  |       | 4.48   | 11.16 | -1.35 | 0.00 |
| TRINITY_DN93725_c3_g3_i1  |       | 0.21   | 2.12  | -2.92 | 0.00 |
| TRINITY_DN93733_c3_g1_i1  |       | 105.03 | 71.04 | 0.59  | 0.00 |
| TRINITY_DN93753_c0_g2_i10 | PLCG2 | 1.10   | 6.04  | -2.48 | 0.00 |
| TRINITY_DN93757_c8_g1_i1  |       | 6.81   | 31.27 | -2.28 | 0.00 |
| TRINITY_DN93781_c5_g1_i1  |       | 0.16   | 3.03  | -4.36 | 0.00 |
| TRINITY_DN93792_c2_g1_i4  | LMO7  | 0.00   | 4.81  | -7.57 | 0.00 |
| TRINITY_DN93794_c5_g2_i2  | PTGES | 0.06   | 1.79  | -4.42 | 0.00 |
| TRINITY_DN93813_c7_g2_i2  |       | 3.81   | 0.00  | 6.75  | 0.00 |
| TRINITY_DN93813_c8_g2_i1  |       | 5.17   | 1.20  | 2.27  | 0.00 |
| TRINITY_DN93814_c6_g4_i1  |       | 3.03   | 10.65 | -1.86 | 0.00 |
| TRINITY_DN93826_c3_g2_i5  | KCD12 | 0.03   | 1.51  | -4.66 | 0.00 |
| TRINITY_DN93833_c2_g1_i3  |       | 20.41  | 3.67  | 2.53  | 0.00 |
| TRINITY_DN93841_c0_g4_i1  |       | 3.89   | 23.26 | -2.58 | 0.00 |
| TRINITY_DN93848_c2_g2_i4  | CLD8  | 46.75  | 70.52 | -0.60 | 0.00 |
| TRINITY_DN93862_c0_g2_i1  |       | 19.93  | 61.55 | -1.62 | 0.00 |
| TRINITY_DN93870_c0_g1_i3  |       | 0.12   | 1.53  | -3.56 | 0.00 |
| TRINITY_DN93870_c0_g1_i7  |       | 1.12   | 3.64  | -1.73 | 0.00 |
| TRINITY_DN93883_c5_g5_i1  |       | 1.27   | 8.02  | -2.67 | 0.00 |
| TRINITY_DN93884_c9_g1_i4  | UROL1 | 0.60   | 3.45  | -2.51 | 0.00 |
| TRINITY_DN93890_c3_g1_i2  |       | 19.81  | 5.39  | 1.96  | 0.00 |
| TRINITY_DN93895_c4_g5_i1  |       | 0.08   | 1.38  | -3.99 | 0.00 |
| TRINITY_DN93901_c3_g1_i1  |       | 3.15   | 0.00  | 5.90  | 0.00 |
| TRINITY_DN93903_c2_g1_i1  |       | 3.41   | 0.28  | 3.52  | 0.00 |
| TRINITY_DN93907_c1_g1_i2  |       | 1.44   | 5.79  | -2.07 | 0.00 |
| TRINITY_DN93910_c4_g2_i6  |       | 0.01   | 0.75  | -5.49 | 0.00 |
| TRINITY_DN93930_c1_g1_i1  | CLDY  | 0.07   | 2.05  | -5.14 | 0.00 |
| TRINITY_DN93930_c1_g4_i1  | CLD4  | 2.90   | 20.23 | -2.84 | 0.00 |
| TRINITY_DN93934_c0_g1_i3  | GELS  | 28.09  | 49.39 | -0.84 | 0.00 |
| TRINITY_DN93934_c0_g1_i5  | GELS  | 20.80  | 38.51 | -0.93 | 0.00 |
| TRINITY_DN93941_c11_g1_i1 |       | 1.33   | 0.37  | 1.78  | 0.00 |
| TRINITY_DN93951_c4_g1_i1  |       | 7.25   | 2.00  | 1.85  | 0.00 |
| TRINITY_DN93960_c2_g1_i4  |       | 2.63   | 8.15  | -1.67 | 0.00 |

|                           |       |        |        |       |      |
|---------------------------|-------|--------|--------|-------|------|
| TRINITY_DN93960_c2_g2_i3  | K1C42 | 13.81  | 45.03  | -1.70 | 0.00 |
| TRINITY_DN93971_c6_g1_i1  |       | 2.22   | 0.11   | 4.60  | 0.00 |
| TRINITY_DN94010_c8_g1_i5  | IKBA  | 0.05   | 1.06   | -3.95 | 0.00 |
| TRINITY_DN94014_c1_g1_i8  | EIF3A | 26.79  | 0.84   | 4.58  | 0.00 |
| TRINITY_DN94015_c0_g1_i1  |       | 2.67   | 6.72   | -1.34 | 0.00 |
| TRINITY_DN94024_c2_g2_i7  |       | 4.53   | 8.27   | -0.91 | 0.00 |
| TRINITY_DN94026_c6_g2_i1  |       | 4.73   | 40.54  | -3.12 | 0.00 |
| TRINITY_DN94029_c1_g1_i1  | STAG2 | 0.33   | 2.70   | -4.43 | 0.00 |
| TRINITY_DN94032_c0_g1_i1  | TAGAP | 1.91   | 4.67   | -1.29 | 0.00 |
| TRINITY_DN94032_c0_g1_i2  | TAGAP | 1.41   | 6.91   | -2.29 | 0.00 |
| TRINITY_DN94050_c9_g1_i1  |       | 0.04   | 1.58   | -4.68 | 0.00 |
| TRINITY_DN94058_c1_g1_i16 | MARE1 | 0.00   | 1.19   | -5.36 | 0.00 |
| TRINITY_DN94062_c3_g2_i1  |       | 1.27   | 0.00   | 5.72  | 0.00 |
| TRINITY_DN94065_c1_g2_i2  | CCDC3 | 5.33   | 2.87   | 0.90  | 0.00 |
| TRINITY_DN94066_c8_g1_i1  |       | 5.67   | 1.21   | 2.22  | 0.00 |
| TRINITY_DN94070_c2_g1_i1  | C1S   | 29.91  | 46.22  | -0.65 | 0.00 |
| TRINITY_DN94071_c3_g1_i3  |       | 212.99 | 667.92 | -1.55 | 0.00 |
| TRINITY_DN94086_c0_g1_i5  |       | 0.00   | 2.33   | -6.95 | 0.00 |
| TRINITY_DN94091_c0_g4_i2  | CATK  | 24.04  | 48.60  | -0.96 | 0.00 |
| TRINITY_DN94094_c0_g3_i1  | CLD3  | 64.70  | 114.11 | -0.84 | 0.00 |
| TRINITY_DN94094_c0_g3_i4  | CLD3  | 3.33   | 18.24  | -2.54 | 0.00 |
| TRINITY_DN94094_c0_g4_i1  | CLD4  | 32.49  | 63.47  | -0.98 | 0.00 |
| TRINITY_DN94100_c2_g2_i1  | FRRS1 | 6.75   | 50.26  | -2.90 | 0.00 |
| TRINITY_DN94108_c1_g1_i10 | RSPRY | 1.70   | 0.00   | 5.48  | 0.00 |
| TRINITY_DN94114_c0_g1_i1  |       | 6.53   | 15.66  | -1.27 | 0.00 |
| TRINITY_DN94124_c5_g5_i1  |       | 0.61   | 4.29   | -2.95 | 0.00 |
| TRINITY_DN94128_c3_g1_i5  | CYTF  | 1.65   | 9.19   | -2.37 | 0.00 |
| TRINITY_DN94141_c5_g2_i2  | ISM2  | 0.02   | 0.72   | -4.37 | 0.00 |
| TRINITY_DN94146_c2_g1_i8  | ERMAP | 0.58   | 4.45   | -2.87 | 0.00 |
| TRINITY_DN94154_c0_g1_i1  | ATS5  | 1.10   | 0.27   | 1.97  | 0.00 |
| TRINITY_DN94155_c0_g1_i3  | PKHF1 | 1.66   | 0.67   | 1.28  | 0.00 |
| TRINITY_DN94164_c2_g1_i1  | RNSL3 | 2.15   | 22.62  | -3.28 | 0.00 |
| TRINITY_DN94169_c1_g1_i4  |       | 4.87   | 1.40   | 1.77  | 0.00 |
| TRINITY_DN94172_c1_g3_i3  | RA1L2 | 9.65   | 1.28   | 3.08  | 0.00 |
| TRINITY_DN94173_c0_g3_i2  | ITM2B | 60.50  | 99.79  | -0.75 | 0.00 |
| TRINITY_DN94181_c5_g2_i3  |       | 3.00   | 7.82   | -1.38 | 0.00 |
| TRINITY_DN94188_c7_g1_i1  |       | 4.84   | 0.49   | 3.10  | 0.00 |
| TRINITY_DN94194_c0_g2_i1  |       | 6.72   | 0.00   | 6.94  | 0.00 |
| TRINITY_DN94196_c5_g1_i6  | S35F6 | 5.52   | 9.13   | -0.71 | 0.00 |
| TRINITY_DN94200_c4_g1_i5  |       | 223.46 | 601.83 | -1.49 | 0.00 |
| TRINITY_DN94200_c4_g1_i6  |       | 36.37  | 112.48 | -1.63 | 0.00 |
| TRINITY_DN94200_c4_g1_i7  |       | 7.97   | 31.20  | -1.98 | 0.00 |

|                           |       |        |         |       |      |
|---------------------------|-------|--------|---------|-------|------|
| TRINITY_DN94200_c4_g6_i1  |       | 0.43   | 8.05    | -4.24 | 0.00 |
| TRINITY_DN94200_c4_g7_i1  |       | 0.10   | 2.35    | -3.41 | 0.00 |
| TRINITY_DN94206_c6_g2_i2  |       | 0.06   | 1.88    | -4.16 | 0.00 |
| TRINITY_DN94228_c7_g1_i1  | B2L14 | 0.62   | 3.66    | -2.58 | 0.00 |
| TRINITY_DN94228_c7_g1_i3  |       | 0.21   | 3.01    | -3.70 | 0.00 |
| TRINITY_DN94234_c2_g1_i2  |       | 0.50   | 2.51    | -2.27 | 0.00 |
| TRINITY_DN94244_c0_g1_i4  | WDR37 | 1.04   | 2.71    | -1.40 | 0.00 |
| TRINITY_DN94246_c3_g1_i4  |       | 0.08   | 3.07    | -5.49 | 0.00 |
| TRINITY_DN94250_c5_g3_i1  |       | 0.02   | 1.04    | -4.05 | 0.00 |
| TRINITY_DN94251_c11_g3_i1 |       | 0.91   | 2.94    | -1.67 | 0.00 |
| TRINITY_DN94260_c2_g1_i1  |       | 519.02 | 1029.68 | -0.99 | 0.00 |
| TRINITY_DN94263_c2_g2_i8  |       | 2.94   | 21.52   | -2.94 | 0.00 |
| TRINITY_DN94272_c6_g3_i1  | NSRP1 | 0.09   | 4.57    | -4.47 | 0.00 |
| TRINITY_DN94274_c4_g1_i1  |       | 54.39  | 17.61   | 1.60  | 0.00 |
| TRINITY_DN94286_c5_g1_i2  | TAC2N | 0.00   | 1.19    | -5.33 | 0.00 |
| TRINITY_DN94290_c2_g1_i1  |       | 0.09   | 4.40    | -5.47 | 0.00 |
| TRINITY_DN94300_c3_g1_i1  | PSA6  | 9.21   | 16.07   | -0.80 | 0.00 |
| TRINITY_DN94300_c3_g1_i2  | PSA6  | 12.68  | 37.26   | -1.62 | 0.00 |
| TRINITY_DN94314_c2_g2_i1  |       | 2.49   | 13.23   | -2.46 | 0.00 |
| TRINITY_DN94317_c3_g2_i1  |       | 0.04   | 1.88    | -3.91 | 0.00 |
| TRINITY_DN94321_c5_g1_i1  |       | 3.30   | 22.93   | -2.82 | 0.00 |
| TRINITY_DN94327_c5_g1_i1  |       | 8.99   | 28.64   | -1.69 | 0.00 |
| TRINITY_DN94328_c2_g1_i1  | NPC2  | 57.17  | 97.09   | -0.76 | 0.00 |
| TRINITY_DN94332_c6_g1_i1  |       | 0.42   | 2.58    | -2.69 | 0.00 |
| TRINITY_DN94333_c0_g1_i5  | CCL20 | 1.32   | 23.33   | -4.13 | 0.00 |
| TRINITY_DN94333_c0_g1_i6  |       | 0.06   | 1.35    | -3.80 | 0.00 |
| TRINITY_DN94335_c0_g1_i3  | DOCK8 | 0.00   | 0.89    | -4.09 | 0.00 |
| TRINITY_DN94339_c4_g1_i5  |       | 5.22   | 24.17   | -2.32 | 0.00 |
| TRINITY_DN94342_c4_g2_i1  |       | 7.70   | 28.73   | -1.91 | 0.00 |
| TRINITY_DN94342_c6_g3_i2  |       | 1.46   | 7.02    | -2.20 | 0.00 |
| TRINITY_DN94348_c4_g1_i7  | PDLI1 | 25.14  | 15.23   | 0.75  | 0.00 |
| TRINITY_DN94374_c2_g1_i2  | NEUL3 | 0.03   | 1.41    | -4.68 | 0.00 |
| TRINITY_DN94376_c2_g1_i7  | IGSF3 | 1.89   | 14.45   | -2.96 | 0.00 |
| TRINITY_DN94380_c7_g3_i11 | CD63  | 79.54  | 124.86  | -0.66 | 0.00 |
| TRINITY_DN94381_c4_g1_i1  | I20RB | 1.54   | 0.13    | 3.68  | 0.00 |
| TRINITY_DN94383_c0_g1_i11 | FYB   | 0.07   | 0.97    | -3.75 | 0.00 |
| TRINITY_DN94383_c0_g1_i4  | FYB   | 1.67   | 8.00    | -2.28 | 0.00 |
| TRINITY_DN94392_c0_g4_i1  | BC11A | 1.47   | 3.97    | -1.39 | 0.00 |
| TRINITY_DN94401_c11_g1_i3 | AGRG4 | 0.05   | 3.65    | -6.11 | 0.00 |
| TRINITY_DN94401_c11_g1_i4 | AGRG4 | 0.05   | 2.86    | -5.79 | 0.00 |
| TRINITY_DN94407_c4_g5_i1  |       | 18.28  | 11.96   | 0.61  | 0.00 |
| TRINITY_DN94425_c5_g1_i5  | FLT3  | 1.15   | 6.79    | -2.51 | 0.00 |

|                           |       |        |        |       |      |
|---------------------------|-------|--------|--------|-------|------|
| TRINITY_DN94435_c2_g1_i1  |       | 34.36  | 188.73 | -2.45 | 0.00 |
| TRINITY_DN94435_c2_g1_i15 |       | 11.72  | 39.92  | -1.77 | 0.00 |
| TRINITY_DN94435_c2_g1_i3  | HB2D  | 65.06  | 257.45 | -2.06 | 0.00 |
| TRINITY_DN94435_c2_g1_i5  |       | 203.05 | 545.41 | -1.40 | 0.00 |
| TRINITY_DN94435_c2_g2_i1  |       | 1.86   | 22.42  | -3.70 | 0.00 |
| TRINITY_DN94444_c1_g1_i1  | OST48 | 28.69  | 18.35  | 0.65  | 0.00 |
| TRINITY_DN94445_c0_g1_i6  |       | 5.29   | 23.20  | -2.09 | 0.00 |
| TRINITY_DN94445_c0_g1_i7  |       | 0.75   | 7.47   | -3.42 | 0.00 |
| TRINITY_DN94449_c3_g1_i1  | GDIR1 | 19.66  | 33.66  | -0.80 | 0.00 |
| TRINITY_DN94463_c5_g1_i6  |       | 0.07   | 1.65   | -3.96 | 0.00 |
| TRINITY_DN94472_c2_g3_i1  |       | 8.80   | 2.15   | 2.12  | 0.00 |
| TRINITY_DN94483_c2_g3_i1  |       | 13.62  | 4.37   | 1.64  | 0.00 |
| TRINITY_DN94496_c3_g1_i9  | SON   | 0.42   | 3.39   | -2.99 | 0.00 |
| TRINITY_DN94502_c3_g1_i2  |       | 4.06   | 1.91   | 1.12  | 0.00 |
| TRINITY_DN94539_c1_g1_i8  |       | 0.49   | 5.00   | -3.55 | 0.00 |
| TRINITY_DN94540_c5_g1_i1  |       | 0.23   | 4.21   | -3.40 | 0.00 |
| TRINITY_DN94543_c11_g1_i2 |       | 0.18   | 1.57   | -3.20 | 0.00 |
| TRINITY_DN94544_c7_g1_i1  |       | 8.83   | 2.59   | 1.79  | 0.00 |
| TRINITY_DN94557_c5_g2_i1  |       | 20.52  | 49.98  | -1.31 | 0.00 |
| TRINITY_DN94557_c6_g2_i1  |       | 0.00   | 1.37   | -5.24 | 0.00 |
| TRINITY_DN94562_c2_g1_i12 | IKZF1 | 0.19   | 2.07   | -3.48 | 0.00 |
| TRINITY_DN94562_c2_g1_i3  | IKZF1 | 0.00   | 0.57   | -5.05 | 0.00 |
| TRINITY_DN94567_c5_g4_i2  | LADD  | 1.41   | 129.37 | -6.43 | 0.00 |
| TRINITY_DN94572_c3_g2_i7  | CHM4B | 0.82   | 18.00  | -4.39 | 0.00 |
| TRINITY_DN94578_c5_g1_i4  | I12R2 | 0.00   | 0.94   | -6.15 | 0.00 |
| TRINITY_DN94580_c0_g2_i1  |       | 0.53   | 14.81  | -4.63 | 0.00 |
| TRINITY_DN94582_c4_g1_i6  |       | 1.57   | 0.00   | 4.99  | 0.00 |
| TRINITY_DN94622_c4_g1_i4  |       | 0.07   | 2.00   | -4.63 | 0.00 |
| TRINITY_DN94627_c11_g2_i5 |       | 0.03   | 0.48   | -3.35 | 0.00 |
| TRINITY_DN94627_c9_g1_i1  |       | 15.39  | 6.38   | 1.30  | 0.00 |
| TRINITY_DN94649_c2_g1_i1  |       | 29.88  | 15.58  | 0.92  | 0.00 |
| TRINITY_DN94655_c3_g1_i1  |       | 1.55   | 0.40   | 1.86  | 0.00 |
| TRINITY_DN94655_c5_g1_i1  | IL8   | 2.40   | 6.04   | -1.40 | 0.00 |
| TRINITY_DN94662_c2_g1_i11 |       | 1.13   | 4.22   | -1.98 | 0.00 |
| TRINITY_DN94664_c9_g5_i1  |       | 0.18   | 1.45   | -3.13 | 0.00 |
| TRINITY_DN94674_c1_g1_i13 |       | 0.57   | 3.54   | -2.61 | 0.00 |
| TRINITY_DN94674_c1_g1_i2  | REG1B | 0.00   | 1.72   | -4.90 | 0.00 |
| TRINITY_DN94676_c5_g1_i2  |       | 25.67  | 81.10  | -1.67 | 0.00 |
| TRINITY_DN94676_c5_g1_i3  |       | 6.73   | 25.69  | -1.89 | 0.00 |
| TRINITY_DN94676_c5_g1_i4  |       | 0.85   | 12.76  | -3.61 | 0.00 |
| TRINITY_DN94706_c4_g4_i2  |       | 3.11   | 0.79   | 2.11  | 0.00 |
| TRINITY_DN94708_c0_g1_i2  | VP26A | 3.61   | 0.00   | 7.43  | 0.00 |

|                           |       |       |       |       |      |
|---------------------------|-------|-------|-------|-------|------|
| TRINITY_DN94714_c12_g2_i1 |       | 2.37  | 6.86  | -1.55 | 0.00 |
| TRINITY_DN94716_c0_g1_i2  | SE1L3 | 0.75  | 2.38  | -1.69 | 0.00 |
| TRINITY_DN94747_c0_g2_i10 | SLK   | 0.63  | 3.18  | -2.35 | 0.00 |
| TRINITY_DN94753_c0_g2_i1  | GRAB  | 0.11  | 2.50  | -4.08 | 0.00 |
| TRINITY_DN94753_c0_g2_i5  | GRZ1  | 0.77  | 3.58  | -2.27 | 0.00 |
| TRINITY_DN94766_c11_g3_i1 |       | 1.36  | 3.63  | -1.37 | 0.00 |
| TRINITY_DN94774_c11_g2_i6 |       | 0.09  | 1.74  | -3.44 | 0.00 |
| TRINITY_DN94777_c8_g1_i1  |       | 1.51  | 9.59  | -2.61 | 0.00 |
| TRINITY_DN94787_c1_g1_i13 | JAK2  | 0.06  | 0.48  | -3.06 | 0.00 |
| TRINITY_DN94787_c1_g1_i2  | JAK2  | 0.19  | 2.66  | -3.81 | 0.00 |
| TRINITY_DN94810_c2_g1_i7  | CO9A1 | 1.37  | 0.00  | 6.04  | 0.00 |
| TRINITY_DN94817_c3_g2_i4  |       | 0.19  | 3.10  | -3.86 | 0.00 |
| TRINITY_DN94825_c6_g1_i1  |       | 0.69  | 2.83  | -2.07 | 0.00 |
| TRINITY_DN94831_c3_g1_i1  | RAC2  | 13.58 | 24.87 | -0.90 | 0.00 |
| TRINITY_DN94831_c3_g1_i5  | RAC2  | 13.82 | 30.11 | -1.10 | 0.00 |
| TRINITY_DN94859_c10_g1_i1 |       | 14.04 | 1.18  | 3.61  | 0.00 |
| TRINITY_DN94860_c5_g2_i1  |       | 18.51 | 45.00 | -1.25 | 0.00 |
| TRINITY_DN94881_c3_g7_i2  |       | 11.55 | 2.47  | 2.22  | 0.00 |
| TRINITY_DN94894_c1_g1_i11 | CDN1B | 14.38 | 24.46 | -0.77 | 0.00 |
| TRINITY_DN94896_c1_g1_i1  |       | 0.98  | 22.38 | -4.39 | 0.00 |
| TRINITY_DN94903_c1_g1_i10 |       | 0.03  | 0.72  | -4.38 | 0.00 |
| TRINITY_DN94908_c0_g2_i2  | GRK6  | 1.09  | 6.15  | -2.50 | 0.00 |
| TRINITY_DN94909_c0_g3_i1  | EHD1  | 0.57  | 1.95  | -1.82 | 0.00 |
| TRINITY_DN94916_c7_g2_i1  |       | 45.02 | 30.06 | 0.57  | 0.00 |
| TRINITY_DN94927_c0_g2_i14 |       | 0.00  | 3.84  | -5.01 | 0.00 |
| TRINITY_DN94927_c0_g2_i3  | ZN185 | 1.03  | 11.78 | -3.52 | 0.00 |
| TRINITY_DN94932_c3_g1_i1  |       | 1.07  | 7.63  | -2.84 | 0.00 |
| TRINITY_DN94943_c5_g2_i2  | PHTF1 | 0.00  | 2.38  | -5.81 | 0.00 |
| TRINITY_DN94953_c0_g1_i1  | GAS1  | 7.06  | 4.04  | 0.80  | 0.00 |
| TRINITY_DN94964_c5_g3_i1  |       | 1.82  | 10.10 | -2.42 | 0.00 |
| TRINITY_DN94968_c0_g1_i3  | UB2D2 | 16.60 | 22.76 | -0.46 | 0.00 |
| TRINITY_DN94968_c0_g1_i7  | UB2D2 | 2.95  | 0.11  | 4.89  | 0.00 |
| TRINITY_DN94989_c3_g2_i1  | ASIC1 | 5.25  | 1.75  | 1.63  | 0.00 |
| TRINITY_DN95004_c5_g2_i7  | SAT1  | 0.94  | 2.45  | -1.40 | 0.00 |
| TRINITY_DN95004_c5_g3_i1  |       | 2.57  | 15.34 | -2.46 | 0.00 |
| TRINITY_DN95014_c3_g1_i2  |       | 1.47  | 8.26  | -2.64 | 0.00 |
| TRINITY_DN95017_c2_g1_i2  | DTX1  | 0.12  | 1.97  | -3.60 | 0.00 |
| TRINITY_DN95017_c4_g1_i4  | SEPT9 | 7.98  | 18.94 | -1.26 | 0.00 |
| TRINITY_DN95024_c0_g1_i1  | WNT11 | 5.99  | 2.58  | 1.19  | 0.00 |
| TRINITY_DN95043_c10_g1_i1 |       | 7.00  | 0.72  | 3.31  | 0.00 |
| TRINITY_DN95043_c10_g2_i1 |       | 5.40  | 0.23  | 4.48  | 0.00 |
| TRINITY_DN95044_c9_g2_i1  |       | 4.68  | 29.51 | -2.72 | 0.00 |

|                           |       |        |        |        |      |
|---------------------------|-------|--------|--------|--------|------|
| TRINITY_DN95056_c4_g1_i1  | SKAP1 | 0.27   | 3.56   | -3.82  | 0.00 |
| TRINITY_DN95056_c4_g1_i3  | SKAP1 | 0.78   | 4.70   | -2.59  | 0.00 |
| TRINITY_DN95056_c4_g1_i5  | SKAP1 | 0.85   | 4.03   | -2.21  | 0.00 |
| TRINITY_DN95076_c2_g1_i2  |       | 0.75   | 6.81   | -3.21  | 0.00 |
| TRINITY_DN95076_c2_g2_i1  | FSTL1 | 33.14  | 21.52  | 0.63   | 0.00 |
| TRINITY_DN95076_c2_g3_i1  | FSTL1 | 83.77  | 36.81  | 1.21   | 0.00 |
| TRINITY_DN95079_c11_g1_i1 |       | 27.09  | 9.23   | 0.94   | 0.00 |
| TRINITY_DN95088_c3_g3_i2  |       | 0.06   | 0.53   | -2.99  | 0.00 |
| TRINITY_DN95088_c3_g3_i8  |       | 0.40   | 3.74   | -3.17  | 0.00 |
| TRINITY_DN95101_c0_g1_i2  | OST2B | 58.15  | 30.77  | 0.92   | 0.00 |
| TRINITY_DN95101_c0_g1_i3  | OST2B | 19.04  | 9.03   | 1.07   | 0.00 |
| TRINITY_DN95103_c0_g4_i1  |       | 4.68   | 0.19   | 3.93   | 0.00 |
| TRINITY_DN95109_c6_g1_i1  | BTK   | 1.66   | 6.45   | -2.00  | 0.00 |
| TRINITY_DN95113_c7_g1_i4  |       | 0.00   | 3.14   | -4.40  | 0.00 |
| TRINITY_DN95121_c1_g1_i3  | CTDS2 | 0.00   | 2.83   | -22.54 | 0.00 |
| TRINITY_DN95126_c6_g2_i3  |       | 0.48   | 1.86   | -2.03  | 0.00 |
| TRINITY_DN95127_c10_g1_i2 | CSL2  | 10.18  | 211.69 | -4.38  | 0.00 |
| TRINITY_DN95127_c10_g1_i7 | CSL2  | 1.23   | 21.82  | -4.08  | 0.00 |
| TRINITY_DN95127_c10_g1_i9 | CSL2  | 20.69  | 273.60 | -3.67  | 0.00 |
| TRINITY_DN95136_c2_g3_i2  | K1C13 | 250.07 | 48.43  | 2.48   | 0.00 |
| TRINITY_DN95139_c0_g1_i7  | RND3  | 3.67   | 1.48   | 1.29   | 0.00 |
| TRINITY_DN95148_c8_g2_i2  |       | 0.18   | 5.21   | -4.81  | 0.00 |
| TRINITY_DN95157_c0_g1_i2  |       | 0.05   | 1.43   | -5.18  | 0.00 |
| TRINITY_DN95157_c0_g1_i9  | RAB1B | 0.00   | 1.36   | -6.07  | 0.00 |
| TRINITY_DN95183_c0_g4_i1  | BID   | 9.15   | 17.27  | -0.94  | 0.00 |
| TRINITY_DN95184_c0_g4_i1  |       | 17.37  | 8.87   | 0.96   | 0.00 |
| TRINITY_DN95190_c0_g1_i3  | CO1A2 | 152.96 | 76.18  | 1.12   | 0.00 |
| TRINITY_DN95190_c0_g1_i6  | CO1A2 | 117.56 | 61.34  | 0.99   | 0.00 |
| TRINITY_DN95190_c0_g1_i7  | CO1A2 | 75.23  | 23.92  | 1.73   | 0.00 |
| TRINITY_DN95224_c0_g1_i4  | TSN1  | 0.34   | 4.62   | -3.81  | 0.00 |
| TRINITY_DN95224_c0_g1_i6  | TSN1  | 0.22   | 3.39   | -3.55  | 0.00 |
| TRINITY_DN95229_c11_g1_i1 |       | 6.75   | 12.57  | -0.91  | 0.00 |
| TRINITY_DN95243_c4_g1_i1  | CYH4  | 3.07   | 6.71   | -1.13  | 0.00 |
| TRINITY_DN95256_c6_g6_i1  |       | 14.87  | 5.02   | 1.62   | 0.00 |
| TRINITY_DN95277_c3_g1_i4  | NEIL1 | 3.98   | 1.65   | 1.30   | 0.00 |
| TRINITY_DN95280_c4_g1_i13 | DHR11 | 10.75  | 20.15  | -0.94  | 0.00 |
| TRINITY_DN95288_c9_g3_i2  | GGH   | 16.72  | 29.33  | -0.83  | 0.00 |
| TRINITY_DN95289_c5_g11_i3 |       | 0.23   | 2.25   | -3.14  | 0.00 |
| TRINITY_DN95291_c0_g4_i2  | BT2A1 | 18.33  | 43.30  | -1.29  | 0.00 |
| TRINITY_DN95296_c8_g1_i1  | CCL14 | 20.92  | 76.59  | -1.91  | 0.00 |
| TRINITY_DN95297_c4_g1_i18 | ITB7  | 5.20   | 14.08  | -1.45  | 0.00 |
| TRINITY_DN95297_c4_g1_i2  | ITB7  | 0.20   | 1.36   | -2.72  | 0.00 |



|                           |       |       |        |       |      |
|---------------------------|-------|-------|--------|-------|------|
| TRINITY_DN95299_c8_g1_i1  |       | 1.02  | 3.63   | -1.82 | 0.00 |
| TRINITY_DN95305_c3_g8_i1  |       | 0.69  | 2.86   | -2.09 | 0.00 |
| TRINITY_DN95309_c2_g1_i1  |       | 0.38  | 1.00   | -1.43 | 0.00 |
| TRINITY_DN95325_c1_g1_i4  | PSB7  | 30.83 | 56.80  | -0.88 | 0.00 |
| TRINITY_DN95325_c1_g2_i4  | PB6LB | 15.21 | 28.15  | -0.91 | 0.00 |
| TRINITY_DN95327_c0_g1_i1  |       | 0.11  | 1.22   | -3.42 | 0.00 |
| TRINITY_DN95327_c0_g1_i13 |       | 2.57  | 10.00  | -1.98 | 0.00 |
| TRINITY_DN95327_c0_g1_i9  |       | 6.76  | 12.34  | -0.87 | 0.00 |
| TRINITY_DN95347_c9_g5_i1  | RM22  | 0.62  | 2.76   | -2.13 | 0.00 |
| TRINITY_DN95359_c2_g1_i2  |       | 0.16  | 1.43   | -3.14 | 0.00 |
| TRINITY_DN95368_c7_g4_i1  |       | 0.70  | 5.60   | -3.23 | 0.00 |
| TRINITY_DN95394_c2_g1_i2  |       | 83.08 | 302.42 | -1.83 | 0.00 |
| TRINITY_DN95405_c6_g2_i2  |       | 0.08  | 29.58  | -8.01 | 0.00 |
| TRINITY_DN95412_c5_g5_i2  |       | 1.01  | 11.88  | -3.58 | 0.00 |
| TRINITY_DN95422_c13_g1_i1 |       | 13.75 | 5.44   | 1.33  | 0.00 |
| TRINITY_DN95425_c0_g3_i1  |       | 1.54  | 3.85   | -1.32 | 0.00 |
| TRINITY_DN95429_c4_g4_i1  |       | 13.97 | 56.76  | -2.08 | 0.00 |
| TRINITY_DN95445_c9_g1_i4  | STAT4 | 0.50  | 5.87   | -2.99 | 0.00 |
| TRINITY_DN95445_c9_g2_i1  | STAT4 | 0.00  | 1.04   | -4.13 | 0.00 |
| TRINITY_DN95446_c2_g1_i1  |       | 3.60  | 20.06  | -2.45 | 0.00 |
| TRINITY_DN95447_c0_g1_i1  |       | 4.87  | 25.46  | -2.51 | 0.00 |
| TRINITY_DN95451_c0_g1_i15 | SLAF8 | 0.03  | 0.86   | -3.68 | 0.00 |
| TRINITY_DN95460_c0_g2_i3  | ASCC2 | 0.83  | 0.00   | 5.94  | 0.00 |
| TRINITY_DN95462_c0_g2_i6  | RIOK3 | 18.38 | 10.04  | 0.90  | 0.00 |
| TRINITY_DN95469_c9_g2_i1  | LX15B | 2.53  | 8.24   | -1.70 | 0.00 |
| TRINITY_DN95469_c9_g3_i1  |       | 9.22  | 21.65  | -1.24 | 0.00 |
| TRINITY_DN95471_c5_g1_i4  |       | 1.02  | 6.52   | -2.73 | 0.00 |
| TRINITY_DN95491_c0_g2_i3  | ACSL6 | 0.64  | 0.00   | 5.75  | 0.00 |
| TRINITY_DN95497_c4_g2_i3  | ATS12 | 4.05  | 2.21   | 0.88  | 0.00 |
| TRINITY_DN95517_c7_g3_i1  |       | 9.92  | 40.02  | -1.98 | 0.00 |
| TRINITY_DN95520_c10_g1_i2 |       | 0.28  | 4.35   | -3.73 | 0.00 |
| TRINITY_DN95527_c4_g2_i1  |       | 0.21  | 1.72   | -2.79 | 0.00 |
| TRINITY_DN95537_c0_g1_i11 | LPCT4 | 0.02  | 0.82   | -4.30 | 0.00 |
| TRINITY_DN95538_c1_g1_i3  | TXB1B | 6.26  | 0.00   | 7.57  | 0.00 |
| TRINITY_DN95547_c0_g1_i2  |       | 0.12  | 1.19   | -3.49 | 0.00 |
| TRINITY_DN95554_c2_g2_i1  | SCOCA | 0.04  | 1.89   | -5.12 | 0.00 |
| TRINITY_DN95563_c4_g1_i1  | NAR5  | 0.03  | 8.31   | -6.97 | 0.00 |
| TRINITY_DN95569_c5_g1_i1  | M4A4A | 6.87  | 37.37  | -2.52 | 0.00 |
| TRINITY_DN95577_c1_g2_i7  | LEG3  | 5.92  | 0.41   | 3.94  | 0.00 |
| TRINITY_DN95585_c4_g1_i1  |       | 26.66 | 54.20  | -1.07 | 0.00 |
| TRINITY_DN95585_c4_g7_i1  |       | 12.51 | 7.59   | 0.70  | 0.00 |
| TRINITY_DN95587_c5_g2_i1  |       | 1.05  | 3.13   | -1.60 | 0.00 |

|                           |       |        |        |       |      |
|---------------------------|-------|--------|--------|-------|------|
| TRINITY_DN95592_c7_g1_i1  |       | 14.91  | 1.87   | 3.08  | 0.00 |
| TRINITY_DN95609_c5_g3_i2  |       | 0.00   | 2.52   | -4.37 | 0.00 |
| TRINITY_DN95623_c1_g7_i1  |       | 8.32   | 25.92  | -1.67 | 0.00 |
| TRINITY_DN95629_c3_g1_i5  | TVA3  | 0.00   | 2.42   | -4.24 | 0.00 |
| TRINITY_DN95634_c5_g1_i2  | KLF4  | 32.41  | 58.82  | -0.89 | 0.00 |
| TRINITY_DN95643_c5_g3_i3  | NPTN  | 1.48   | 0.32   | 2.41  | 0.00 |
| TRINITY_DN95644_c0_g1_i1  |       | 21.37  | 7.80   | 1.43  | 0.00 |
| TRINITY_DN95656_c4_g1_i1  | GBP1  | 16.54  | 41.63  | -1.35 | 0.00 |
| TRINITY_DN95673_c5_g2_i2  | KCNQ2 | 1.59   | 0.00   | 5.93  | 0.00 |
| TRINITY_DN95688_c10_g1_i1 |       | 0.78   | 3.49   | -2.16 | 0.00 |
| TRINITY_DN95688_c7_g1_i5  | LRRF2 | 0.05   | 0.73   | -3.39 | 0.00 |
| TRINITY_DN95696_c2_g1_i2  | IL12B | 0.03   | 3.45   | -6.11 | 0.00 |
| TRINITY_DN95696_c2_g1_i4  |       | 0.21   | 6.43   | -4.82 | 0.00 |
| TRINITY_DN95696_c2_g1_i7  | IL12B | 0.54   | 6.75   | -3.61 | 0.00 |
| TRINITY_DN95699_c0_g1_i3  | HVM16 | 0.00   | 6.17   | -5.51 | 0.00 |
| TRINITY_DN95699_c0_g3_i2  | HV02  | 0.00   | 4.84   | -5.11 | 0.00 |
| TRINITY_DN95710_c3_g1_i1  | MKB   | 19.12  | 8.87   | 1.11  | 0.00 |
| TRINITY_DN95719_c3_g1_i1  | CO4A2 | 6.14   | 3.47   | 0.82  | 0.00 |
| TRINITY_DN95725_c7_g2_i3  | AMPB  | 6.56   | 11.09  | -0.77 | 0.00 |
| TRINITY_DN95738_c6_g3_i3  |       | 0.31   | 1.54   | -2.41 | 0.00 |
| TRINITY_DN95741_c2_g6_i1  | FUCO2 | 17.77  | 23.54  | -0.42 | 0.00 |
| TRINITY_DN95750_c10_g1_i1 |       | 2.42   | 4.55   | -0.95 | 0.00 |
| TRINITY_DN95753_c1_g1_i1  | CCR9  | 2.10   | 6.99   | -1.75 | 0.00 |
| TRINITY_DN95753_c1_g1_i3  | CCR9  | 3.60   | 12.95  | -1.83 | 0.00 |
| TRINITY_DN95767_c8_g2_i1  |       | 6.19   | 1.77   | 1.78  | 0.00 |
| TRINITY_DN95772_c7_g1_i1  |       | 1.87   | 4.65   | -1.30 | 0.00 |
| TRINITY_DN95776_c0_g1_i1  |       | 1.03   | 21.64  | -4.28 | 0.00 |
| TRINITY_DN95795_c5_g2_i1  |       | 2.19   | 19.67  | -3.21 | 0.00 |
| TRINITY_DN95810_c7_g3_i1  |       | 4.02   | 17.94  | -2.22 | 0.00 |
| TRINITY_DN95813_c4_g2_i2  |       | 0.13   | 2.58   | -4.11 | 0.00 |
| TRINITY_DN95829_c13_g2_i4 |       | 55.74  | 240.26 | -2.00 | 0.00 |
| TRINITY_DN95834_c2_g1_i6  | CTNB1 | 16.49  | 8.06   | 1.01  | 0.00 |
| TRINITY_DN95838_c1_g1_i4  | HA2B  | 171.10 | 938.36 | -2.53 | 0.00 |
| TRINITY_DN95838_c1_g1_i9  |       | 3.20   | 18.55  | -2.58 | 0.00 |
| TRINITY_DN95845_c2_g1_i10 | RNT2  | 11.47  | 35.12  | -1.68 | 0.00 |
| TRINITY_DN95846_c2_g1_i3  | FCGR1 | 3.82   | 8.23   | -1.09 | 0.00 |
| TRINITY_DN95848_c7_g1_i1  |       | 25.20  | 43.82  | -0.80 | 0.00 |
| TRINITY_DN95854_c6_g1_i1  |       | 1.94   | 11.23  | -2.66 | 0.00 |
| TRINITY_DN95867_c0_g1_i4  |       | 0.06   | 1.73   | -4.63 | 0.00 |
| TRINITY_DN95881_c9_g1_i1  | ADRB2 | 0.06   | 0.91   | -3.71 | 0.00 |
| TRINITY_DN95882_c5_g3_i3  | I22R2 | 0.61   | 4.66   | -2.94 | 0.00 |
| TRINITY_DN95885_c2_g1_i1  | CD3Z  | 2.18   | 6.80   | -1.69 | 0.00 |

|                           |       |        |        |       |      |
|---------------------------|-------|--------|--------|-------|------|
| TRINITY_DN95895_c3_g1_i1  |       | 1.61   | 11.26  | -2.77 | 0.00 |
| TRINITY_DN95899_c5_g1_i1  |       | 0.16   | 0.93   | -2.57 | 0.00 |
| TRINITY_DN95906_c4_g1_i14 | TESP1 | 0.78   | 2.67   | -1.86 | 0.00 |
| TRINITY_DN95912_c2_g1_i5  | PROX1 | 0.78   | 1.88   | -1.24 | 0.00 |
| TRINITY_DN95921_c4_g1_i5  |       | 18.57  | 65.36  | -1.78 | 0.00 |
| TRINITY_DN95924_c1_g1_i8  | ODO2  | 0.00   | 1.99   | -5.78 | 0.00 |
| TRINITY_DN95929_c5_g1_i2  |       | 0.07   | 0.85   | -3.63 | 0.00 |
| TRINITY_DN95929_c5_g1_i3  |       | 5.31   | 15.39  | -1.60 | 0.00 |
| TRINITY_DN95938_c0_g1_i1  | KAPCB | 1.05   | 3.20   | -1.63 | 0.00 |
| TRINITY_DN95939_c6_g1_i2  |       | 0.00   | 5.79   | -7.29 | 0.00 |
| TRINITY_DN95946_c3_g1_i2  | SNX1  | 2.67   | 0.57   | 3.85  | 0.00 |
| TRINITY_DN95948_c14_g1_i1 | K1C13 | 126.22 | 53.12  | 1.31  | 0.00 |
| TRINITY_DN95948_c14_g1_i3 | K1C13 | 45.52  | 16.06  | 1.55  | 0.00 |
| TRINITY_DN95948_c14_g1_i4 | K1C13 | 96.96  | 32.75  | 1.71  | 0.00 |
| TRINITY_DN95948_c14_g1_i6 | K1C13 | 225.13 | 46.18  | 2.36  | 0.00 |
| TRINITY_DN95948_c14_g2_i1 | K1C13 | 220.79 | 81.91  | 1.51  | 0.00 |
| TRINITY_DN95975_c0_g1_i3  | RB3GP | 2.17   | 8.82   | -2.17 | 0.00 |
| TRINITY_DN95976_c2_g1_i3  | HDHD5 | 0.89   | 0.17   | 2.41  | 0.00 |
| TRINITY_DN95985_c3_g1_i2  |       | 1.78   | 8.31   | -2.21 | 0.00 |
| TRINITY_DN95985_c3_g4_i2  |       | 23.00  | 124.20 | -2.48 | 0.00 |
| TRINITY_DN95988_c0_g4_i1  |       | 0.88   | 0.00   | 5.09  | 0.00 |
| TRINITY_DN95995_c0_g1_i13 |       | 0.18   | 1.76   | -3.37 | 0.00 |
| TRINITY_DN95997_c14_g1_i1 |       | 0.40   | 9.92   | -4.07 | 0.00 |
| TRINITY_DN96021_c8_g1_i1  | NMI   | 0.00   | 7.36   | -8.23 | 0.00 |
| TRINITY_DN96026_c4_g1_i1  |       | 0.00   | 1.91   | -4.47 | 0.00 |
| TRINITY_DN96032_c4_g2_i1  |       | 1.64   | 7.75   | -2.26 | 0.00 |
| TRINITY_DN96047_c2_g1_i2  |       | 190.99 | 55.10  | 1.86  | 0.00 |
| TRINITY_DN96047_c2_g1_i3  |       | 96.23  | 29.18  | 1.75  | 0.00 |
| TRINITY_DN96047_c2_g1_i7  |       | 195.80 | 85.92  | 1.23  | 0.00 |
| TRINITY_DN96047_c2_g2_i1  |       | 117.01 | 32.80  | 1.93  | 0.00 |
| TRINITY_DN96047_c2_g2_i2  |       | 13.70  | 6.01   | 1.19  | 0.00 |
| TRINITY_DN96056_c1_g1_i2  | MOT7  | 0.03   | 1.53   | -4.64 | 0.00 |
| TRINITY_DN96075_c0_g4_i1  | SIPA1 | 1.80   | 5.92   | -1.72 | 0.00 |
| TRINITY_DN96092_c6_g1_i4  | ICOSL | 0.47   | 2.84   | -2.60 | 0.00 |
| TRINITY_DN96098_c0_g2_i3  | HCLS1 | 11.13  | 32.14  | -1.57 | 0.00 |
| TRINITY_DN96098_c0_g5_i1  | HCLS1 | 5.71   | 12.20  | -1.09 | 0.00 |
| TRINITY_DN96101_c0_g3_i1  | VASP  | 8.50   | 17.85  | -1.09 | 0.00 |
| TRINITY_DN96106_c1_g1_i2  | UBIQ  | 98.81  | 165.59 | -0.75 | 0.00 |
| TRINITY_DN96107_c0_g1_i1  | KVD28 | 0.88   | 20.66  | -4.51 | 0.00 |
| TRINITY_DN96107_c0_g2_i10 | KV401 | 0.91   | 5.98   | -2.79 | 0.00 |
| TRINITY_DN96107_c0_g2_i11 | KV15  | 3.46   | 35.35  | -3.48 | 0.00 |
| TRINITY_DN96107_c0_g2_i7  | KV401 | 0.00   | 17.16  | -5.75 | 0.00 |

|                           |       |       |        |       |      |
|---------------------------|-------|-------|--------|-------|------|
| TRINITY_DN96149_c7_g1_i2  | RGS18 | 4.71  | 10.75  | -1.21 | 0.00 |
| TRINITY_DN96168_c0_g3_i1  | PCDG3 | 6.84  | 3.48   | 0.96  | 0.00 |
| TRINITY_DN96184_c10_g1_i1 |       | 3.34  | 8.68   | -1.37 | 0.00 |
| TRINITY_DN96186_c6_g1_i4  | MCUR1 | 0.02  | 0.56   | -3.56 | 0.00 |
| TRINITY_DN96200_c4_g1_i2  | OIT3  | 0.07  | 1.12   | -4.01 | 0.00 |
| TRINITY_DN96215_c6_g2_i1  |       | 0.41  | 1.44   | -1.82 | 0.00 |
| TRINITY_DN96232_c1_g2_i1  | OTC   | 2.85  | 1.19   | 1.28  | 0.00 |
| TRINITY_DN96240_c5_g1_i2  | GFPT2 | 0.27  | 7.40   | -4.79 | 0.00 |
| TRINITY_DN96245_c0_g3_i1  | EPYC  | 1.21  | 0.07   | 4.05  | 0.00 |
| TRINITY_DN96250_c5_g2_i1  | DLX3B | 8.59  | 4.96   | 0.78  | 0.00 |
| TRINITY_DN96251_c7_g2_i1  | KIBRA | 0.02  | 0.64   | -4.54 | 0.00 |
| TRINITY_DN96260_c3_g2_i6  |       | 3.28  | 13.19  | -1.98 | 0.00 |
| TRINITY_DN96269_c0_g1_i2  |       | 5.44  | 2.38   | 1.21  | 0.00 |
| TRINITY_DN96270_c1_g1_i6  | TGFB1 | 0.03  | 1.62   | -4.87 | 0.00 |
| TRINITY_DN96270_c2_g2_i1  |       | 15.12 | 7.75   | 0.96  | 0.00 |
| TRINITY_DN96272_c1_g3_i1  | 1A25  | 1.13  | 2.83   | -1.37 | 0.00 |
| TRINITY_DN96292_c0_g1_i2  |       | 4.51  | 377.49 | -6.27 | 0.00 |
| TRINITY_DN96292_c0_g1_i3  |       | 1.01  | 65.35  | -5.47 | 0.00 |
| TRINITY_DN96292_c0_g1_i5  |       | 0.37  | 61.77  | -7.26 | 0.00 |
| TRINITY_DN96292_c0_g1_i7  |       | 0.17  | 25.85  | -6.61 | 0.00 |
| TRINITY_DN96302_c2_g3_i2  |       | 16.21 | 5.61   | 1.56  | 0.00 |
| TRINITY_DN96305_c3_g5_i1  |       | 0.07  | 0.83   | -3.27 | 0.00 |
| TRINITY_DN96306_c2_g2_i1  |       | 22.24 | 12.57  | 0.83  | 0.00 |
| TRINITY_DN96314_c1_g1_i1  | TPRGL | 2.97  | 4.83   | -0.72 | 0.00 |
| TRINITY_DN96315_c7_g2_i7  |       | 6.01  | 0.50   | 3.54  | 0.00 |
| TRINITY_DN96322_c4_g1_i1  |       | 5.16  | 25.32  | -2.17 | 0.00 |
| TRINITY_DN96336_c1_g3_i1  | C163A | 1.75  | 5.71   | -1.78 | 0.00 |
| TRINITY_DN96337_c3_g2_i5  |       | 0.57  | 2.72   | -2.27 | 0.00 |
| TRINITY_DN96341_c2_g1_i1  |       | 0.68  | 3.24   | -2.21 | 0.00 |
| TRINITY_DN96343_c0_g1_i1  | SPDEF | 0.14  | 2.51   | -4.28 | 0.00 |
| TRINITY_DN96347_c7_g1_i5  | ICEF1 | 0.00  | 0.90   | -5.20 | 0.00 |
| TRINITY_DN96354_c1_g1_i5  | PEDF  | 57.46 | 34.21  | 0.75  | 0.00 |
| TRINITY_DN96356_c7_g1_i1  | CD82  | 0.00  | 4.92   | -7.36 | 0.00 |
| TRINITY_DN96356_c7_g1_i2  | CD82  | 14.91 | 4.85   | 1.58  | 0.00 |
| TRINITY_DN96377_c10_g1_i1 |       | 0.99  | 9.19   | -3.30 | 0.00 |
| TRINITY_DN96385_c2_g1_i1  |       | 31.43 | 11.63  | 1.46  | 0.00 |
| TRINITY_DN96410_c0_g3_i2  |       | 21.33 | 12.75  | 0.73  | 0.00 |
| TRINITY_DN96438_c10_g1_i2 |       | 0.07  | 0.83   | -3.12 | 0.00 |
| TRINITY_DN96442_c8_g1_i1  |       | 5.08  | 2.75   | 0.90  | 0.00 |
| TRINITY_DN96446_c7_g3_i1  |       | 1.07  | 6.49   | -2.86 | 0.00 |
| TRINITY_DN96458_c0_g1_i2  | SLPI  | 6.58  | 1.87   | 1.86  | 0.00 |
| TRINITY_DN96473_c2_g1_i1  |       | 15.37 | 10.20  | 0.57  | 0.00 |

|                            |       |        |        |       |      |
|----------------------------|-------|--------|--------|-------|------|
| TRINITY_DN96473_c2_g2_i1   |       | 2.08   | 1.13   | 0.87  | 0.00 |
| TRINITY_DN96476_c8_g1_i3   |       | 0.52   | 2.39   | -2.26 | 0.00 |
| TRINITY_DN96493_c1_g4_i1   | TMED2 | 0.00   | 6.42   | -8.21 | 0.00 |
| TRINITY_DN96498_c1_g1_i1   | CL17A | 0.58   | 2.42   | -2.12 | 0.00 |
| TRINITY_DN96498_c1_g1_i3   | ASGR2 | 0.08   | 1.38   | -3.80 | 0.00 |
| TRINITY_DN96511_c0_g1_i5   | 5NTD  | 0.59   | 1.71   | -1.58 | 0.00 |
| TRINITY_DN96513_c0_g1_i4   | CP46A | 0.11   | 1.15   | -3.53 | 0.00 |
| TRINITY_DN96515_c0_g1_i1   |       | 9.06   | 31.29  | -1.82 | 0.00 |
| TRINITY_DN96515_c1_g1_i4   |       | 2.72   | 6.03   | -1.16 | 0.00 |
| TRINITY_DN96522_c0_g1_i6   | PF23B | 0.77   | 0.02   | 5.67  | 0.00 |
| TRINITY_DN96524_c13_g1_i15 |       | 0.14   | 2.33   | -4.30 | 0.00 |
| TRINITY_DN96525_c4_g1_i4   |       | 210.66 | 17.30  | 3.71  | 0.00 |
| TRINITY_DN96525_c4_g1_i5   |       | 7.94   | 0.63   | 3.80  | 0.00 |
| TRINITY_DN96526_c1_g1_i1   |       | 2.07   | 0.00   | 5.70  | 0.00 |
| TRINITY_DN96537_c4_g2_i3   |       | 0.00   | 4.67   | -4.21 | 0.00 |
| TRINITY_DN96538_c1_g1_i1   | LCK   | 2.40   | 8.77   | -1.84 | 0.00 |
| TRINITY_DN96540_c5_g1_i6   |       | 32.11  | 1.45   | 4.46  | 0.00 |
| TRINITY_DN96547_c6_g1_i1   |       | 3.58   | 9.30   | -1.41 | 0.00 |
| TRINITY_DN96550_c0_g2_i10  | ELF3  | 16.46  | 45.02  | -1.51 | 0.00 |
| TRINITY_DN96550_c0_g2_i12  | ELF3  | 0.07   | 1.73   | -4.41 | 0.00 |
| TRINITY_DN96550_c0_g3_i2   | EHF   | 0.00   | 0.70   | -4.05 | 0.00 |
| TRINITY_DN96550_c0_g3_i3   | EHF   | 6.52   | 22.80  | -1.81 | 0.00 |
| TRINITY_DN96561_c6_g1_i4   |       | 0.00   | 14.83  | -5.79 | 0.00 |
| TRINITY_DN96591_c1_g2_i2   | DEFI6 | 1.01   | 4.25   | -2.01 | 0.00 |
| TRINITY_DN96591_c1_g3_i1   |       | 0.77   | 4.54   | -2.63 | 0.00 |
| TRINITY_DN96591_c2_g1_i1   | DEFI6 | 1.36   | 4.43   | -1.70 | 0.00 |
| TRINITY_DN96593_c0_g1_i14  | ZAP70 | 0.09   | 0.89   | -3.25 | 0.00 |
| TRINITY_DN96593_c0_g1_i20  | ZAP70 | 0.42   | 2.90   | -2.73 | 0.00 |
| TRINITY_DN96600_c1_g1_i7   | DAZP1 | 0.81   | 0.08   | 3.65  | 0.00 |
| TRINITY_DN96621_c5_g1_i3   |       | 27.71  | 105.85 | -1.92 | 0.00 |
| TRINITY_DN96623_c0_g1_i2   | CO1A1 | 335.14 | 168.37 | 1.05  | 0.00 |
| TRINITY_DN96644_c4_g2_i2   |       | 2.36   | 10.69  | -2.20 | 0.00 |
| TRINITY_DN96645_c13_g1_i2  |       | 5.83   | 25.11  | -2.17 | 0.00 |
| TRINITY_DN96650_c1_g1_i1   |       | 2.54   | 14.05  | -2.51 | 0.00 |
| TRINITY_DN96671_c16_g1_i1  |       | 2.03   | 6.59   | -1.77 | 0.00 |
| TRINITY_DN96671_c18_g1_i1  |       | 23.50  | 10.70  | 1.11  | 0.00 |
| TRINITY_DN96679_c3_g3_i1   |       | 18.62  | 81.47  | -2.07 | 0.00 |
| TRINITY_DN96684_c0_g1_i1   |       | 78.80  | 37.67  | 1.09  | 0.00 |
| TRINITY_DN96688_c14_g3_i2  | TC1A  | 1.42   | 7.15   | -2.38 | 0.00 |
| TRINITY_DN96689_c5_g1_i1   |       | 0.18   | 5.42   | -4.22 | 0.00 |
| TRINITY_DN96698_c3_g1_i3   |       | 0.21   | 2.72   | -3.72 | 0.00 |
| TRINITY_DN96698_c3_g1_i5   |       | 1.68   | 11.83  | -2.85 | 0.00 |

|                           |       |        |        |       |      |
|---------------------------|-------|--------|--------|-------|------|
| TRINITY_DN96707_c7_g1_i2  |       | 7.71   | 14.44  | -0.90 | 0.00 |
| TRINITY_DN96708_c4_g1_i1  | GPR82 | 0.66   | 2.39   | -1.90 | 0.00 |
| TRINITY_DN96710_c4_g1_i2  |       | 0.08   | 1.15   | -3.27 | 0.00 |
| TRINITY_DN96710_c5_g2_i3  |       | 5.55   | 9.94   | -0.88 | 0.00 |
| TRINITY_DN96712_c0_g1_i1  | FZD2  | 9.32   | 4.95   | 0.94  | 0.00 |
| TRINITY_DN96717_c4_g2_i1  |       | 7.45   | 4.14   | 0.82  | 0.00 |
| TRINITY_DN96730_c1_g3_i13 | RUFY3 | 0.00   | 1.18   | -5.50 | 0.00 |
| TRINITY_DN96740_c9_g2_i4  | VISTA | 4.98   | 17.04  | -1.83 | 0.00 |
| TRINITY_DN96747_c1_g1_i11 |       | 0.00   | 1.12   | -5.20 | 0.00 |
| TRINITY_DN96747_c1_g1_i4  |       | 3.29   | 13.12  | -1.88 | 0.00 |
| TRINITY_DN96747_c1_g2_i2  |       | 2.26   | 18.58  | -2.89 | 0.00 |
| TRINITY_DN96747_c1_g2_i5  |       | 4.70   | 18.28  | -1.94 | 0.00 |
| TRINITY_DN96769_c3_g1_i1  |       | 0.66   | 4.25   | -2.54 | 0.00 |
| TRINITY_DN96769_c3_g1_i4  |       | 0.38   | 2.13   | -2.40 | 0.00 |
| TRINITY_DN96769_c4_g1_i2  |       | 9.38   | 3.96   | 1.25  | 0.00 |
| TRINITY_DN96770_c0_g2_i4  |       | 0.07   | 1.98   | -4.13 | 0.00 |
| TRINITY_DN96778_c4_g3_i3  | LBP   | 11.04  | 31.16  | -1.53 | 0.00 |
| TRINITY_DN96793_c3_g1_i3  |       | 0.00   | 3.66   | -7.31 | 0.00 |
| TRINITY_DN96800_c3_g1_i1  | FLVC2 | 0.18   | 0.84   | -2.30 | 0.00 |
| TRINITY_DN96805_c4_g1_i2  |       | 0.14   | 2.97   | -4.42 | 0.00 |
| TRINITY_DN96805_c4_g1_i3  | IFI44 | 28.82  | 265.12 | -3.21 | 0.00 |
| TRINITY_DN96805_c4_g1_i4  | IFI44 | 0.00   | 4.30   | -6.13 | 0.00 |
| TRINITY_DN96805_c4_g1_i6  | IFI44 | 5.94   | 163.71 | -4.76 | 0.00 |
| TRINITY_DN96811_c4_g1_i3  |       | 25.12  | 10.90  | 1.23  | 0.00 |
| TRINITY_DN96811_c4_g2_i1  |       | 11.38  | 5.81   | 0.95  | 0.00 |
| TRINITY_DN96866_c4_g1_i1  | CO1A1 | 149.61 | 68.75  | 1.16  | 0.00 |
| TRINITY_DN96883_c11_g1_i4 | ASC   | 17.64  | 37.48  | -1.10 | 0.00 |
| TRINITY_DN96898_c4_g3_i5  | ODPA  | 0.03   | 1.62   | -4.98 | 0.00 |
| TRINITY_DN96903_c12_g2_i2 |       | 1.62   | 5.50   | -1.77 | 0.00 |
| TRINITY_DN96907_c0_g1_i6  | SEM7A | 0.83   | 4.29   | -2.40 | 0.00 |
| TRINITY_DN96914_c8_g4_i3  | I12R2 | 1.11   | 3.67   | -1.74 | 0.00 |
| TRINITY_DN96919_c15_g1_i1 |       | 10.69  | 70.49  | -2.77 | 0.00 |
| TRINITY_DN96920_c0_g2_i2  |       | 0.09   | 5.12   | -4.37 | 0.00 |
| TRINITY_DN96920_c0_g2_i9  |       | 0.07   | 4.57   | -5.29 | 0.00 |
| TRINITY_DN96933_c3_g1_i1  |       | 0.00   | 1.82   | -4.67 | 0.00 |
| TRINITY_DN96933_c4_g1_i1  | FEV   | 2.34   | 4.99   | -1.09 | 0.00 |
| TRINITY_DN96938_c0_g1_i1  | PNBA  | 20.47  | 11.60  | 0.82  | 0.00 |
| TRINITY_DN96941_c5_g1_i5  |       | 34.35  | 102.03 | -1.57 | 0.00 |
| TRINITY_DN96941_c5_g1_i6  |       | 0.86   | 4.28   | -2.38 | 0.00 |
| TRINITY_DN96941_c6_g2_i3  | SPI1  | 2.94   | 6.98   | -1.28 | 0.00 |
| TRINITY_DN96941_c6_g2_i4  | SPI1  | 0.42   | 1.72   | -2.01 | 0.00 |
| TRINITY_DN96941_c6_g2_i9  | SPI1  | 0.99   | 4.34   | -2.10 | 0.00 |

|                           |       |        |        |       |      |
|---------------------------|-------|--------|--------|-------|------|
| TRINITY_DN96956_c10_g1_i2 |       | 0.31   | 11.35  | -4.24 | 0.00 |
| TRINITY_DN96968_c5_g5_i2  | IGSF3 | 5.10   | 19.05  | -1.93 | 0.00 |
| TRINITY_DN96981_c3_g1_i5  | EX3L1 | 0.00   | 1.94   | -5.96 | 0.00 |
| TRINITY_DN96982_c7_g7_i1  |       | 0.61   | 1.80   | -1.55 | 0.00 |
| TRINITY_DN96984_c2_g1_i1  |       | 1.36   | 3.99   | -1.57 | 0.00 |
| TRINITY_DN96996_c4_g3_i1  |       | 0.00   | 6.69   | -4.84 | 0.00 |
| TRINITY_DN97005_c0_g1_i5  | I5P2  | 3.63   | 11.13  | -1.60 | 0.00 |
| TRINITY_DN97014_c2_g1_i6  | SFRP3 | 12.94  | 7.91   | 0.69  | 0.00 |
| TRINITY_DN97017_c0_g2_i13 | CAN2  | 0.84   | 4.26   | -2.24 | 0.00 |
| TRINITY_DN97018_c10_g1_i2 | DDR2  | 0.92   | 0.05   | 4.03  | 0.00 |
| TRINITY_DN97025_c0_g1_i1  | PGAM1 | 0.11   | 7.19   | -5.84 | 0.00 |
| TRINITY_DN97025_c0_g1_i3  | PGAM1 | 43.62  | 23.34  | 0.91  | 0.00 |
| TRINITY_DN97035_c2_g1_i1  |       | 0.00   | 1.31   | -5.38 | 0.00 |
| TRINITY_DN97037_c0_g1_i1  |       | 2.10   | 0.65   | 1.74  | 0.00 |
| TRINITY_DN97038_c0_g1_i3  |       | 361.84 | 142.90 | 1.33  | 0.00 |
| TRINITY_DN97038_c0_g1_i4  |       | 233.39 | 45.86  | 2.47  | 0.00 |
| TRINITY_DN97038_c1_g1_i5  |       | 0.07   | 0.52   | -3.00 | 0.00 |
| TRINITY_DN97042_c1_g1_i1  | GIMA7 | 1.28   | 17.16  | -3.73 | 0.00 |
| TRINITY_DN97083_c10_g6_i1 |       | 0.85   | 3.06   | -1.84 | 0.00 |
| TRINITY_DN97095_c0_g2_i5  | SIK2  | 3.20   | 7.60   | -1.25 | 0.00 |
| TRINITY_DN97116_c3_g1_i4  | TRAF2 | 0.24   | 2.57   | -3.47 | 0.00 |
| TRINITY_DN97117_c5_g1_i2  |       | 0.53   | 3.99   | -3.15 | 0.00 |
| TRINITY_DN97124_c2_g2_i1  | GPX4  | 1.68   | 12.01  | -2.84 | 0.00 |
| TRINITY_DN97124_c2_g2_i2  | GPX4  | 1.05   | 6.74   | -2.73 | 0.00 |
| TRINITY_DN97126_c0_g1_i1  | FUCO  | 38.95  | 54.22  | -0.51 | 0.00 |
| TRINITY_DN97130_c2_g1_i1  |       | 1.24   | 5.11   | -2.10 | 0.00 |
| TRINITY_DN97135_c0_g2_i2  | CC50A | 2.31   | 4.76   | -1.06 | 0.00 |
| TRINITY_DN97136_c8_g1_i1  | PHYD1 | 0.95   | 8.58   | -3.22 | 0.00 |
| TRINITY_DN97151_c6_g1_i5  | GP1BB | 19.05  | 5.99   | 1.78  | 0.00 |
| TRINITY_DN97176_c0_g1_i11 | TESK2 | 0.00   | 2.38   | -6.33 | 0.00 |
| TRINITY_DN97179_c6_g2_i1  |       | 1.92   | 12.34  | -2.50 | 0.00 |
| TRINITY_DN97180_c11_g2_i1 | CYTB  | 24.45  | 35.91  | -0.58 | 0.00 |
| TRINITY_DN97198_c0_g2_i8  | CDC45 | 0.03   | 2.14   | -4.25 | 0.00 |
| TRINITY_DN97200_c0_g1_i1  | SPRC  | 75.69  | 42.23  | 0.88  | 0.00 |
| TRINITY_DN97200_c0_g1_i7  | SPRC  | 212.60 | 118.60 | 0.85  | 0.00 |
| TRINITY_DN97204_c11_g1_i2 |       | 0.09   | 1.14   | -3.39 | 0.00 |
| TRINITY_DN97207_c1_g1_i1  |       | 5.41   | 0.80   | 2.90  | 0.00 |
| TRINITY_DN97209_c2_g1_i3  |       | 0.35   | 14.20  | -3.91 | 0.00 |
| TRINITY_DN97209_c2_g1_i8  |       | 3.37   | 28.72  | -3.04 | 0.00 |
| TRINITY_DN97209_c2_g2_i1  |       | 0.58   | 13.66  | -4.55 | 0.00 |
| TRINITY_DN97237_c0_g1_i1  |       | 0.27   | 8.00   | -4.94 | 0.00 |
| TRINITY_DN97239_c2_g2_i2  | ELF3  | 8.98   | 23.48  | -1.42 | 0.00 |

|                           |       |       |        |       |      |
|---------------------------|-------|-------|--------|-------|------|
| TRINITY_DN97239_c2_g3_i6  | EHF   | 0.20  | 1.40   | -2.82 | 0.00 |
| TRINITY_DN97239_c2_g3_i9  | EHF   | 2.75  | 14.75  | -2.40 | 0.00 |
| TRINITY_DN97249_c0_g2_i2  | RN126 | 1.83  | 0.23   | 2.91  | 0.00 |
| TRINITY_DN97253_c2_g2_i1  |       | 4.22  | 21.80  | -2.41 | 0.00 |
| TRINITY_DN97253_c2_g3_i1  |       | 1.99  | 15.70  | -2.94 | 0.00 |
| TRINITY_DN97254_c10_g1_i4 | LIMA1 | 1.63  | 0.00   | 4.74  | 0.00 |
| TRINITY_DN97254_c9_g1_i1  |       | 0.90  | 5.90   | -2.89 | 0.00 |
| TRINITY_DN97266_c3_g1_i1  |       | 18.06 | 113.76 | -2.65 | 0.00 |
| TRINITY_DN97276_c4_g1_i1  |       | 1.16  | 4.94   | -2.15 | 0.00 |
| TRINITY_DN97276_c4_g3_i3  | IFI44 | 0.65  | 7.54   | -3.48 | 0.00 |
| TRINITY_DN97276_c4_g6_i2  |       | 0.00  | 2.00   | -5.63 | 0.00 |
| TRINITY_DN97283_c5_g1_i2  |       | 0.00  | 0.50   | -3.96 | 0.00 |
| TRINITY_DN97286_c2_g1_i1  | SYCC  | 3.15  | 9.34   | -1.58 | 0.00 |
| TRINITY_DN97293_c8_g3_i1  |       | 0.70  | 15.90  | -4.03 | 0.00 |
| TRINITY_DN97299_c2_g1_i1  | EOMES | 0.21  | 0.95   | -2.18 | 0.00 |
| TRINITY_DN97299_c3_g2_i2  |       | 0.53  | 2.15   | -2.02 | 0.00 |
| TRINITY_DN97299_c3_g4_i2  |       | 3.39  | 6.88   | -1.03 | 0.00 |
| TRINITY_DN97314_c0_g2_i8  | TNR14 | 0.00  | 0.41   | -4.45 | 0.00 |
| TRINITY_DN97343_c0_g1_i4  | TECTA | 0.02  | 2.16   | -6.45 | 0.00 |
| TRINITY_DN97344_c1_g1_i9  | PKH4B | 0.08  | 0.32   | -2.44 | 0.00 |
| TRINITY_DN97349_c1_g4_i1  | CATZ  | 61.04 | 98.13  | -0.68 | 0.00 |
| TRINITY_DN97368_c9_g1_i1  |       | 16.09 | 126.26 | -2.97 | 0.00 |
| TRINITY_DN97380_c2_g2_i2  | CK053 | 0.37  | 1.57   | -2.06 | 0.00 |
| TRINITY_DN97380_c2_g2_i4  | CK053 | 0.20  | 1.67   | -3.20 | 0.00 |
| TRINITY_DN97389_c9_g1_i1  |       | 11.80 | 3.21   | 1.91  | 0.00 |
| TRINITY_DN97394_c2_g1_i3  | MCF2L | 0.45  | 2.18   | -2.25 | 0.00 |
| TRINITY_DN97395_c0_g1_i5  | RSSA  | 0.00  | 9.39   | -5.51 | 0.00 |
| TRINITY_DN97398_c2_g2_i1  |       | 0.40  | 19.21  | -5.33 | 0.00 |
| TRINITY_DN97406_c4_g1_i8  | GP183 | 0.67  | 3.90   | -2.52 | 0.00 |
| TRINITY_DN97420_c3_g1_i1  | KLF11 | 13.26 | 4.97   | 1.40  | 0.00 |
| TRINITY_DN97432_c2_g2_i1  |       | 3.39  | 30.96  | -3.18 | 0.00 |
| TRINITY_DN97445_c3_g1_i3  |       | 1.23  | 0.11   | 3.44  | 0.00 |
| TRINITY_DN97460_c1_g1_i6  | CCNG2 | 12.22 | 25.91  | -1.09 | 0.00 |
| TRINITY_DN97473_c0_g1_i1  | CFDP1 | 0.00  | 1.39   | -6.22 | 0.00 |
| TRINITY_DN97477_c0_g1_i4  | CYTIP | 0.43  | 2.23   | -2.32 | 0.00 |
| TRINITY_DN97485_c0_g1_i10 | PSME1 | 38.19 | 72.25  | -0.88 | 0.00 |
| TRINITY_DN97490_c0_g1_i3  | MARCS | 19.79 | 37.12  | -0.94 | 0.00 |
| TRINITY_DN97501_c6_g9_i2  |       | 0.40  | 3.07   | -2.89 | 0.00 |
| TRINITY_DN97515_c5_g1_i1  | RHG27 | 1.78  | 5.09   | -1.52 | 0.00 |
| TRINITY_DN97524_c0_g1_i3  | CATS  | 64.02 | 147.42 | -1.23 | 0.00 |
| TRINITY_DN97524_c0_g1_i4  | CATS  | 5.48  | 14.75  | -1.44 | 0.00 |
| TRINITY_DN97530_c11_g1_i1 |       | 2.72  | 32.05  | -3.54 | 0.00 |



|                           |       |         |         |       |      |
|---------------------------|-------|---------|---------|-------|------|
| TRINITY_DN97530_c9_g1_i2  |       | 23.28   | 8.54    | 1.41  | 0.00 |
| TRINITY_DN97536_c4_g1_i2  |       | 0.89    | 11.06   | -3.42 | 0.00 |
| TRINITY_DN97536_c4_g4_i4  |       | 0.37    | 1.96    | -2.50 | 0.00 |
| TRINITY_DN97538_c0_g1_i5  | I20RA | 0.00    | 1.43    | -6.28 | 0.00 |
| TRINITY_DN97570_c3_g1_i1  |       | 0.00    | 3.24    | -7.01 | 0.00 |
| TRINITY_DN97579_c3_g1_i1  |       | 1.10    | 0.22    | 2.37  | 0.00 |
| TRINITY_DN97587_c3_g1_i2  | RAD51 | 6.05    | 1.05    | 2.50  | 0.00 |
| TRINITY_DN97588_c4_g3_i1  | YTX2  | 0.63    | 5.67    | -2.90 | 0.00 |
| TRINITY_DN97596_c10_g1_i1 |       | 1.76    | 0.00    | 5.99  | 0.00 |
| TRINITY_DN97596_c11_g1_i1 |       | 0.30    | 3.09    | -3.37 | 0.00 |
| TRINITY_DN97604_c8_g1_i1  | DHE3  | 38.77   | 17.66   | 1.21  | 0.00 |
| TRINITY_DN97636_c0_g1_i1  | KPCD3 | 0.33    | 1.38    | -2.01 | 0.00 |
| TRINITY_DN97636_c0_g3_i2  | KPCD3 | 0.13    | 1.32    | -3.16 | 0.00 |
| TRINITY_DN97643_c6_g3_i6  | AGRF3 | 0.73    | 9.55    | -3.78 | 0.00 |
| TRINITY_DN97645_c1_g2_i7  | EMAL1 | 4.67    | 9.27    | -1.00 | 0.00 |
| TRINITY_DN97645_c1_g2_i9  | EMAL1 | 6.62    | 13.45   | -1.05 | 0.00 |
| TRINITY_DN97648_c0_g2_i1  | FERM1 | 4.87    | 2.91    | 0.73  | 0.00 |
| TRINITY_DN97663_c0_g1_i21 |       | 0.08    | 1.13    | -3.65 | 0.00 |
| TRINITY_DN97671_c2_g1_i1  | RN122 | 11.90   | 8.01    | 0.55  | 0.00 |
| TRINITY_DN97672_c1_g3_i4  |       | 0.90    | 2.75    | -1.66 | 0.00 |
| TRINITY_DN97676_c0_g1_i6  | MYO1F | 2.08    | 7.65    | -1.90 | 0.00 |
| TRINITY_DN97681_c0_g1_i1  | PODN  | 4.20    | 1.78    | 1.24  | 0.00 |
| TRINITY_DN97691_c1_g2_i1  |       | 2.89    | 6.48    | -1.16 | 0.00 |
| TRINITY_DN97695_c4_g3_i2  |       | 0.00    | 4.39    | -5.07 | 0.00 |
| TRINITY_DN97699_c1_g1_i2  |       | 3.40    | 23.41   | -2.81 | 0.00 |
| TRINITY_DN97724_c2_g2_i4  | KPRA  | 0.00    | 5.14    | -4.87 | 0.00 |
| TRINITY_DN97728_c1_g4_i2  |       | 1.56    | 0.00    | 6.35  | 0.00 |
| TRINITY_DN97748_c1_g1_i5  | Y1510 | 0.02    | 0.87    | -5.02 | 0.00 |
| TRINITY_DN97762_c4_g2_i5  |       | 0.26    | 2.43    | -3.02 | 0.00 |
| TRINITY_DN97766_c6_g1_i3  |       | 4.11    | 1.23    | 1.73  | 0.00 |
| TRINITY_DN97774_c3_g1_i2  | NHRF1 | 1.45    | 4.84    | -1.75 | 0.00 |
| TRINITY_DN97780_c6_g1_i1  |       | 1.24    | 4.50    | -1.87 | 0.00 |
| TRINITY_DN97796_c3_g2_i1  | B2MG  | 1594.12 | 4386.24 | -1.50 | 0.00 |
| TRINITY_DN97796_c3_g2_i5  |       | 0.11    | 1.13    | -3.26 | 0.00 |
| TRINITY_DN97797_c0_g2_i4  | YTX2  | 0.13    | 0.87    | -2.75 | 0.00 |
| TRINITY_DN97807_c6_g1_i10 | TPSNR | 1.66    | 7.41    | -2.18 | 0.00 |
| TRINITY_DN97825_c5_g2_i1  | RORA  | 0.13    | 4.38    | -3.81 | 0.00 |
| TRINITY_DN97828_c4_g1_i1  |       | 0.19    | 1.29    | -2.63 | 0.00 |
| TRINITY_DN97829_c5_g1_i8  |       | 25.33   | 63.93   | -1.34 | 0.00 |
| TRINITY_DN97890_c0_g1_i1  | DAPLE | 0.38    | 1.53    | -2.00 | 0.00 |
| TRINITY_DN97909_c9_g3_i8  | IGKC  | 1.57    | 11.24   | -2.69 | 0.00 |
| TRINITY_DN97912_c1_g4_i7  |       | 17.47   | 79.53   | -2.20 | 0.00 |

|                           |       |       |        |       |      |
|---------------------------|-------|-------|--------|-------|------|
| TRINITY_DN97913_c0_g1_i1  |       | 6.60  | 21.01  | -1.69 | 0.00 |
| TRINITY_DN97923_c1_g1_i3  | SSRP1 | 0.11  | 4.74   | -5.04 | 0.00 |
| TRINITY_DN97951_c7_g1_i1  | DIAC  | 4.99  | 8.38   | -0.77 | 0.00 |
| TRINITY_DN97964_c4_g1_i2  | DTX1  | 0.24  | 1.35   | -2.38 | 0.00 |
| TRINITY_DN97964_c4_g3_i1  | DTX4  | 1.46  | 5.68   | -1.97 | 0.00 |
| TRINITY_DN97966_c1_g1_i2  | PPTC7 | 1.09  | 0.02   | 6.43  | 0.00 |
| TRINITY_DN97974_c10_g1_i1 |       | 4.42  | 0.40   | 3.47  | 0.00 |
| TRINITY_DN97978_c0_g2_i2  |       | 0.84  | 3.31   | -1.93 | 0.00 |
| TRINITY_DN97980_c2_g1_i1  | GIT2  | 1.93  | 3.84   | -1.01 | 0.00 |
| TRINITY_DN97988_c0_g1_i1  | FAK2  | 5.03  | 17.44  | -1.80 | 0.00 |
| TRINITY_DN97989_c1_g1_i1  | BSDC1 | 0.15  | 3.45   | -4.32 | 0.00 |
| TRINITY_DN98001_c0_g2_i1  |       | 2.66  | 0.57   | 2.33  | 0.00 |
| TRINITY_DN98009_c5_g1_i4  |       | 1.17  | 20.19  | -3.99 | 0.00 |
| TRINITY_DN98009_c5_g1_i8  |       | 2.31  | 23.16  | -3.27 | 0.00 |
| TRINITY_DN98015_c2_g1_i3  | SEM4B | 2.47  | 4.78   | -0.97 | 0.00 |
| TRINITY_DN98022_c0_g1_i3  | RPGR  | 0.59  | 0.00   | 5.23  | 0.00 |
| TRINITY_DN98022_c0_g7_i4  | SRPX  | 12.41 | 6.01   | 1.07  | 0.00 |
| TRINITY_DN98051_c0_g1_i7  |       | 0.14  | 2.97   | -4.26 | 0.00 |
| TRINITY_DN98051_c0_g2_i13 |       | 0.24  | 4.20   | -3.97 | 0.00 |
| TRINITY_DN98051_c0_g2_i2  |       | 0.24  | 2.48   | -3.44 | 0.00 |
| TRINITY_DN98051_c0_g2_i5  | GIMA4 | 0.59  | 3.42   | -2.57 | 0.00 |
| TRINITY_DN98053_c0_g1_i1  |       | 0.00  | 1.91   | -5.61 | 0.00 |
| TRINITY_DN98058_c0_g2_i1  | SPP2A | 0.00  | 4.12   | -7.52 | 0.00 |
| TRINITY_DN98058_c0_g2_i2  | SPP2A | 0.00  | 6.73   | -8.20 | 0.00 |
| TRINITY_DN98058_c0_g2_i6  | SPP2A | 14.99 | 20.93  | -0.52 | 0.00 |
| TRINITY_DN98060_c0_g2_i1  |       | 1.75  | 13.58  | -2.86 | 0.00 |
| TRINITY_DN98070_c4_g3_i1  |       | 0.50  | 3.91   | -2.91 | 0.00 |
| TRINITY_DN98078_c2_g2_i2  |       | 0.61  | 8.36   | -3.69 | 0.00 |
| TRINITY_DN98081_c3_g1_i3  | N4BP3 | 0.76  | 5.48   | -2.90 | 0.00 |
| TRINITY_DN98083_c0_g1_i4  | TCPE  | 0.40  | 2.79   | -2.83 | 0.00 |
| TRINITY_DN98093_c2_g1_i1  | I10R2 | 2.58  | 10.13  | -2.02 | 0.00 |
| TRINITY_DN98097_c1_g1_i5  | B3GN2 | 2.96  | 1.09   | 1.44  | 0.00 |
| TRINITY_DN98109_c7_g1_i1  |       | 0.17  | 1.51   | -3.05 | 0.00 |
| TRINITY_DN98136_c1_g1_i11 |       | 0.89  | 8.33   | -3.18 | 0.00 |
| TRINITY_DN98172_c4_g2_i3  |       | 1.41  | 0.39   | 1.86  | 0.00 |
| TRINITY_DN98193_c5_g1_i5  |       | 16.22 | 51.69  | -1.68 | 0.00 |
| TRINITY_DN98199_c0_g1_i1  | IRF2  | 9.75  | 23.88  | -1.34 | 0.00 |
| TRINITY_DN98199_c0_g1_i15 | IRF1  | 36.98 | 151.01 | -2.07 | 0.00 |
| TRINITY_DN98199_c0_g1_i4  | IRF2  | 0.74  | 1.68   | -1.20 | 0.00 |
| TRINITY_DN98199_c0_g1_i6  | IRF2  | 2.68  | 6.31   | -1.26 | 0.00 |
| TRINITY_DN98203_c9_g1_i2  | UBS3B | 0.56  | 1.97   | -1.78 | 0.00 |
| TRINITY_DN98212_c5_g1_i1  | ITB2  | 1.30  | 14.16  | -3.46 | 0.00 |

|                           |       |        |        |       |      |
|---------------------------|-------|--------|--------|-------|------|
| TRINITY_DN98250_c0_g1_i2  | FOXA2 | 0.35   | 1.73   | -2.28 | 0.00 |
| TRINITY_DN98253_c2_g1_i1  | C1QC  | 132.31 | 398.95 | -1.64 | 0.00 |
| TRINITY_DN98254_c2_g1_i3  | MEFV  | 0.03   | 1.04   | -4.45 | 0.00 |
| TRINITY_DN98254_c2_g1_i4  | TRI39 | 2.07   | 18.23  | -3.16 | 0.00 |
| TRINITY_DN98278_c3_g2_i2  |       | 1.60   | 5.36   | -1.79 | 0.00 |
| TRINITY_DN98279_c0_g2_i1  | CO1A1 | 218.48 | 105.74 | 1.10  | 0.00 |
| TRINITY_DN98279_c0_g2_i2  | CO1A1 | 176.23 | 93.53  | 0.97  | 0.00 |
| TRINITY_DN98306_c5_g1_i11 |       | 11.46  | 0.40   | 4.61  | 0.00 |
| TRINITY_DN98310_c2_g1_i3  | TT39B | 2.14   | 9.77   | -2.12 | 0.00 |
| TRINITY_DN98318_c5_g1_i3  | UHRF2 | 0.00   | 2.36   | -4.48 | 0.00 |
| TRINITY_DN98323_c7_g1_i5  |       | 1.23   | 3.12   | -1.35 | 0.00 |
| TRINITY_DN98328_c3_g1_i2  | MOES  | 6.27   | 11.31  | -0.84 | 0.00 |
| TRINITY_DN98329_c2_g1_i10 | LRRC1 | 0.49   | 0.00   | 5.51  | 0.00 |
| TRINITY_DN98335_c1_g1_i5  |       | 2.07   | 18.37  | -3.10 | 0.00 |
| TRINITY_DN98341_c4_g1_i2  |       | 23.42  | 8.60   | 1.51  | 0.00 |
| TRINITY_DN98341_c4_g3_i5  |       | 2.65   | 0.00   | 6.66  | 0.00 |
| TRINITY_DN98341_c5_g4_i1  |       | 0.62   | 2.33   | -1.88 | 0.00 |
| TRINITY_DN98347_c10_g1_i1 | FZD7B | 15.01  | 8.96   | 0.72  | 0.00 |
| TRINITY_DN98359_c5_g4_i1  |       | 4.52   | 13.54  | -1.64 | 0.00 |
| TRINITY_DN98361_c4_g1_i4  |       | 0.00   | 5.58   | -4.22 | 0.00 |
| TRINITY_DN98367_c0_g2_i10 | S10A1 | 0.83   | 111.22 | -7.07 | 0.00 |
| TRINITY_DN98367_c0_g2_i13 | S10AA | 26.25  | 10.29  | 1.39  | 0.00 |
| TRINITY_DN98367_c0_g2_i14 | S10A1 | 83.46  | 27.77  | 1.63  | 0.00 |
| TRINITY_DN98367_c0_g2_i4  | S10A1 | 473.26 | 224.98 | 1.12  | 0.00 |
| TRINITY_DN98367_c0_g2_i5  | S10A1 | 0.00   | 7.22   | -6.24 | 0.00 |
| TRINITY_DN98367_c0_g2_i7  | S10A1 | 0.11   | 19.33  | -6.87 | 0.00 |
| TRINITY_DN98378_c0_g2_i1  |       | 17.06  | 5.35   | 1.68  | 0.00 |
| TRINITY_DN98381_c3_g1_i1  | PGBD4 | 0.05   | 0.64   | -3.52 | 0.00 |
| TRINITY_DN98404_c0_g2_i8  | TIM50 | 5.08   | 2.29   | 1.18  | 0.00 |
| TRINITY_DN98405_c9_g2_i3  | CD79B | 0.67   | 2.96   | -2.20 | 0.00 |
| TRINITY_DN98414_c4_g5_i2  |       | 0.63   | 1.99   | -1.66 | 0.00 |
| TRINITY_DN98434_c0_g2_i3  | NCKPL | 0.58   | 3.94   | -2.75 | 0.00 |
| TRINITY_DN98438_c0_g2_i1  | IRAK3 | 1.28   | 4.97   | -1.98 | 0.00 |
| TRINITY_DN98438_c0_g6_i1  |       | 0.81   | 10.10  | -3.14 | 0.00 |
| TRINITY_DN98444_c2_g1_i10 |       | 0.50   | 0.00   | 5.25  | 0.00 |
| TRINITY_DN98448_c4_g1_i1  | CLD23 | 26.70  | 40.34  | -0.62 | 0.00 |
| TRINITY_DN98460_c0_g3_i4  | RIPK3 | 6.01   | 14.05  | -1.23 | 0.00 |
| TRINITY_DN98462_c1_g1_i6  | LIMS1 | 9.78   | 4.98   | 1.00  | 0.00 |
| TRINITY_DN98483_c2_g1_i6  | CNTRL | 0.47   | 0.04   | 3.63  | 0.00 |
| TRINITY_DN98494_c2_g2_i1  | PO2F3 | 0.62   | 3.05   | -2.28 | 0.00 |
| TRINITY_DN98507_c3_g1_i4  |       | 4.09   | 25.76  | -2.71 | 0.00 |
| TRINITY_DN98507_c3_g1_i5  |       | 10.14  | 37.81  | -1.89 | 0.00 |

|                           |       |       |       |       |      |
|---------------------------|-------|-------|-------|-------|------|
| TRINITY_DN98512_c0_g1_i3  | AGAP1 | 0.99  | 3.58  | -1.86 | 0.00 |
| TRINITY_DN98513_c0_g1_i6  | THMS1 | 0.07  | 1.04  | -4.02 | 0.00 |
| TRINITY_DN98513_c0_g1_i7  | THMS1 | 0.91  | 3.14  | -1.80 | 0.00 |
| TRINITY_DN98524_c9_g1_i1  |       | 1.05  | 7.85  | -2.97 | 0.00 |
| TRINITY_DN98526_c0_g1_i1  | SOX8  | 3.47  | 11.43 | -1.73 | 0.00 |
| TRINITY_DN98531_c1_g4_i1  |       | 0.08  | 1.07  | -3.33 | 0.00 |
| TRINITY_DN98537_c1_g1_i1  |       | 0.00  | 18.68 | -4.76 | 0.00 |
| TRINITY_DN98545_c3_g1_i1  | NFKB2 | 6.54  | 15.93 | -1.31 | 0.00 |
| TRINITY_DN98547_c0_g1_i1  | PTPRH | 0.46  | 2.39  | -2.38 | 0.00 |
| TRINITY_DN98547_c0_g1_i2  | TENA  | 0.58  | 4.72  | -3.04 | 0.00 |
| TRINITY_DN98547_c1_g3_i4  | IFM3  | 18.56 | 50.32 | -1.50 | 0.00 |
| TRINITY_DN98550_c3_g2_i12 | SOX13 | 1.17  | 7.66  | -2.75 | 0.00 |
| TRINITY_DN98554_c2_g1_i1  | SH21A | 2.18  | 9.20  | -2.10 | 0.00 |
| TRINITY_DN98557_c2_g1_i1  | CD276 | 2.56  | 0.00  | 7.27  | 0.00 |
| TRINITY_DN98575_c7_g1_i1  | CK096 | 4.18  | 1.71  | 1.29  | 0.00 |
| TRINITY_DN98579_c0_g1_i3  | LAG3  | 0.12  | 2.33  | -4.15 | 0.00 |
| TRINITY_DN98597_c4_g1_i1  | CD22  | 0.52  | 3.52  | -2.81 | 0.00 |
| TRINITY_DN98597_c4_g1_i14 | CD22  | 0.05  | 0.70  | -4.17 | 0.00 |
| TRINITY_DN98597_c4_g1_i16 | CD22  | 0.05  | 1.06  | -4.32 | 0.00 |
| TRINITY_DN98597_c4_g1_i2  | CD22  | 0.08  | 1.66  | -4.24 | 0.00 |
| TRINITY_DN98597_c4_g1_i5  | CD22  | 0.00  | 0.65  | -4.94 | 0.00 |
| TRINITY_DN98600_c2_g3_i1  | TNIP2 | 1.35  | 3.56  | -1.39 | 0.00 |
| TRINITY_DN98612_c1_g3_i1  |       | 0.84  | 7.94  | -2.79 | 0.00 |
| TRINITY_DN98612_c2_g1_i2  | KPCT  | 0.00  | 1.27  | -4.60 | 0.00 |
| TRINITY_DN98615_c0_g1_i1  | MACF1 | 1.20  | 1.09  | -1.46 | 0.00 |
| TRINITY_DN98636_c11_g1_i1 | CD22  | 0.00  | 1.18  | -5.75 | 0.00 |
| TRINITY_DN98638_c12_g4_i1 |       | 0.00  | 5.39  | -4.34 | 0.00 |
| TRINITY_DN98658_c11_g1_i3 | CFAD  | 2.62  | 6.82  | -1.39 | 0.00 |
| TRINITY_DN98663_c2_g4_i1  | NECT3 | 1.65  | 5.36  | -1.74 | 0.00 |
| TRINITY_DN98693_c0_g1_i7  |       | 0.04  | 0.75  | -4.50 | 0.00 |
| TRINITY_DN98695_c0_g1_i4  | LRC8D | 0.03  | 0.27  | -3.59 | 0.00 |
| TRINITY_DN98698_c1_g2_i4  | KHDR1 | 0.32  | 1.28  | -2.02 | 0.00 |
| TRINITY_DN98716_c1_g1_i2  | GIMA7 | 1.51  | 5.51  | -1.89 | 0.00 |
| TRINITY_DN98727_c1_g1_i2  |       | 2.15  | 5.20  | -1.23 | 0.00 |
| TRINITY_DN98735_c4_g1_i1  |       | 12.81 | 0.76  | 4.01  | 0.00 |
| TRINITY_DN98739_c4_g1_i1  | SPI1  | 1.04  | 2.56  | -1.31 | 0.00 |
| TRINITY_DN98739_c4_g1_i3  | SPI1  | 3.37  | 11.96 | -1.86 | 0.00 |
| TRINITY_DN98762_c3_g3_i3  |       | 1.11  | 6.43  | -2.42 | 0.00 |
| TRINITY_DN98767_c6_g2_i1  | CENPW | 0.24  | 4.73  | -4.43 | 0.00 |
| TRINITY_DN98784_c7_g1_i1  | LPXN  | 6.29  | 12.78 | -1.04 | 0.00 |
| TRINITY_DN98805_c1_g6_i1  |       | 1.97  | 7.92  | -1.99 | 0.00 |
| TRINITY_DN98814_c1_g1_i11 |       | 0.00  | 4.01  | -6.09 | 0.00 |

|                           |       |        |         |       |      |
|---------------------------|-------|--------|---------|-------|------|
| TRINITY_DN98814_c1_g1_i2  | SOCS1 | 0.00   | 2.32    | -5.51 | 0.00 |
| TRINITY_DN98814_c1_g1_i6  | SOCS1 | 0.00   | 1.99    | -4.79 | 0.00 |
| TRINITY_DN98816_c1_g2_i3  | ABR   | 0.34   | 1.71    | -2.32 | 0.00 |
| TRINITY_DN98829_c4_g2_i2  |       | 3.09   | 13.52   | -2.24 | 0.00 |
| TRINITY_DN98834_c4_g2_i1  |       | 52.43  | 21.75   | 1.21  | 0.00 |
| TRINITY_DN98834_c4_g2_i2  |       | 63.41  | 28.95   | 1.11  | 0.00 |
| TRINITY_DN98836_c3_g1_i1  |       | 543.10 | 1472.43 | -1.49 | 0.00 |
| TRINITY_DN98836_c3_g2_i1  |       | 17.42  | 55.67   | -1.73 | 0.00 |
| TRINITY_DN98842_c0_g2_i3  | CD2   | 1.16   | 5.45    | -2.22 | 0.00 |
| TRINITY_DN98844_c0_g1_i9  | AZI2  | 0.56   | 4.74    | -3.19 | 0.00 |
| TRINITY_DN98865_c3_g1_i2  | VEGFD | 1.15   | 0.02    | 4.78  | 0.00 |
| TRINITY_DN98868_c5_g1_i2  |       | 12.87  | 0.51    | 4.72  | 0.00 |
| TRINITY_DN98877_c3_g1_i1  | DYLT3 | 1.59   | 0.00    | 5.85  | 0.00 |
| TRINITY_DN98884_c4_g1_i6  | AN32B | 11.56  | 1.77    | 2.67  | 0.00 |
| TRINITY_DN98904_c2_g1_i1  |       | 0.00   | 1.72    | -5.39 | 0.00 |
| TRINITY_DN98906_c6_g1_i3  |       | 0.06   | 2.11    | -4.89 | 0.00 |
| TRINITY_DN98906_c6_g1_i9  |       | 3.35   | 17.79   | -2.32 | 0.00 |
| TRINITY_DN98907_c0_g1_i2  |       | 0.00   | 11.41   | -4.96 | 0.00 |
| TRINITY_DN98913_c1_g1_i7  |       | 0.00   | 1.42    | -5.37 | 0.00 |
| TRINITY_DN98913_c1_g1_i9  |       | 0.32   | 2.27    | -2.91 | 0.00 |
| TRINITY_DN98924_c3_g1_i1  |       | 0.12   | 1.65    | -3.55 | 0.00 |
| TRINITY_DN98939_c0_g1_i11 | PAMR1 | 0.65   | 0.02    | 4.81  | 0.00 |
| TRINITY_DN98960_c2_g1_i11 | PPIP1 | 2.39   | 6.53    | -1.48 | 0.00 |
| TRINITY_DN98960_c2_g1_i9  | PPIP1 | 0.31   | 1.62    | -2.38 | 0.00 |
| TRINITY_DN98960_c2_g2_i1  | PPIP1 | 3.17   | 11.16   | -1.95 | 0.00 |
| TRINITY_DN98967_c2_g2_i2  | ACSL1 | 0.98   | 2.86    | -1.61 | 0.00 |
| TRINITY_DN98973_c16_g1_i1 |       | 7.67   | 25.04   | -1.70 | 0.00 |
| TRINITY_DN99000_c3_g2_i5  |       | 0.26   | 2.33    | -3.07 | 0.00 |
| TRINITY_DN99010_c3_g1_i1  |       | 0.04   | 1.99    | -4.22 | 0.00 |
| TRINITY_DN99019_c5_g1_i2  | VASP  | 4.24   | 14.80   | -1.88 | 0.00 |
| TRINITY_DN99021_c3_g1_i1  | MYADM | 0.22   | 1.35    | -2.70 | 0.00 |
| TRINITY_DN99035_c6_g1_i4  | CD53  | 1.56   | 7.64    | -2.33 | 0.00 |
| TRINITY_DN99035_c6_g2_i4  | CD53  | 9.52   | 25.22   | -1.43 | 0.00 |
| TRINITY_DN99037_c1_g1_i3  | RAB35 | 0.00   | 0.88    | -4.80 | 0.00 |
| TRINITY_DN99061_c4_g1_i1  |       | 5.94   | 52.93   | -3.20 | 0.00 |
| TRINITY_DN99064_c0_g1_i4  | MRC1  | 0.28   | 2.96    | -3.44 | 0.00 |
| TRINITY_DN99073_c3_g3_i2  |       | 2.77   | 66.09   | -4.57 | 0.00 |
| TRINITY_DN99073_c3_g4_i1  |       | 0.18   | 6.90    | -5.41 | 0.00 |
| TRINITY_DN99073_c3_g4_i3  |       | 0.55   | 10.14   | -4.26 | 0.00 |
| TRINITY_DN99073_c3_g4_i4  |       | 0.86   | 20.56   | -4.65 | 0.00 |
| TRINITY_DN99080_c3_g1_i2  |       | 2.45   | 0.99    | 1.29  | 0.00 |
| TRINITY_DN99083_c0_g1_i4  |       | 0.33   | 5.59    | -3.98 | 0.00 |

|                           |       |        |        |       |      |
|---------------------------|-------|--------|--------|-------|------|
| TRINITY_DN99084_c0_g1_i1  |       | 1.49   | 6.42   | -2.10 | 0.00 |
| TRINITY_DN99096_c0_g2_i12 | ZC12A | 0.82   | 3.83   | -2.24 | 0.00 |
| TRINITY_DN99096_c0_g2_i2  | ZC12A | 0.39   | 2.91   | -2.95 | 0.00 |
| TRINITY_DN99098_c0_g1_i17 |       | 1.35   | 9.39   | -2.74 | 0.00 |
| TRINITY_DN99099_c0_g1_i1  | TACC3 | 1.62   | 0.00   | 7.05  | 0.00 |
| TRINITY_DN99102_c8_g8_i1  |       | 1.17   | 5.66   | -2.29 | 0.00 |
| TRINITY_DN99122_c8_g3_i1  | PPCE  | 0.31   | 2.86   | -2.98 | 0.00 |
| TRINITY_DN99129_c0_g1_i1  |       | 0.00   | 1.02   | -5.25 | 0.00 |
| TRINITY_DN99129_c0_g1_i2  |       | 7.71   | 3.54   | 1.15  | 0.00 |
| TRINITY_DN99129_c0_g1_i3  |       | 5.81   | 1.84   | 1.70  | 0.00 |
| TRINITY_DN99130_c0_g2_i3  | FSTL1 | 12.12  | 4.03   | 1.59  | 0.00 |
| TRINITY_DN99136_c12_g1_i1 |       | 15.57  | 3.32   | 2.18  | 0.00 |
| TRINITY_DN99166_c3_g1_i1  |       | 0.28   | 4.95   | -3.92 | 0.00 |
| TRINITY_DN99178_c0_g1_i13 | BAZ2B | 0.00   | 0.86   | -6.09 | 0.00 |
| TRINITY_DN99185_c4_g3_i1  |       | 1.18   | 21.69  | -4.02 | 0.00 |
| TRINITY_DN99206_c2_g1_i3  | GIMA4 | 0.10   | 1.72   | -3.75 | 0.00 |
| TRINITY_DN99217_c0_g1_i4  | I20L2 | 0.00   | 2.73   | -6.50 | 0.00 |
| TRINITY_DN99224_c0_g1_i15 | PLD4  | 2.48   | 6.31   | -1.36 | 0.00 |
| TRINITY_DN99238_c2_g1_i1  |       | 0.21   | 4.55   | -4.55 | 0.00 |
| TRINITY_DN99259_c3_g2_i1  |       | 3.56   | 7.86   | -1.13 | 0.00 |
| TRINITY_DN99260_c0_g3_i1  | IBP5  | 1.37   | 0.00   | 6.03  | 0.00 |
| TRINITY_DN99266_c3_g1_i3  |       | 2.47   | 109.16 | -5.32 | 0.00 |
| TRINITY_DN99266_c3_g1_i6  |       | 0.14   | 5.17   | -4.77 | 0.00 |
| TRINITY_DN99268_c1_g1_i2  | SDHA  | 4.38   | 0.68   | 2.76  | 0.00 |
| TRINITY_DN99283_c4_g1_i5  | STXB  | 18.25  | 39.20  | -1.09 | 0.00 |
| TRINITY_DN99291_c0_g1_i4  | LS12A | 11.92  | 8.21   | 0.53  | 0.00 |
| TRINITY_DN99298_c0_g1_i1  | SH3L1 | 19.97  | 32.73  | -0.72 | 0.00 |
| TRINITY_DN99308_c1_g1_i4  | ZMAT5 | 3.13   | 0.16   | 4.55  | 0.00 |
| TRINITY_DN99308_c1_g1_i5  | ZMAT5 | 1.87   | 0.09   | 4.47  | 0.00 |
| TRINITY_DN99308_c1_g3_i1  |       | 2.88   | 0.44   | 2.67  | 0.00 |
| TRINITY_DN99312_c0_g1_i2  | TRAF3 | 0.11   | 0.96   | -2.98 | 0.00 |
| TRINITY_DN99313_c0_g1_i2  |       | 0.18   | 11.59  | -3.72 | 0.00 |
| TRINITY_DN99315_c5_g1_i1  | CCD50 | 2.34   | 0.08   | 4.80  | 0.00 |
| TRINITY_DN99316_c6_g1_i1  | ASPP2 | 0.37   | 1.77   | -2.09 | 0.00 |
| TRINITY_DN99346_c3_g2_i2  | LAMC2 | 0.83   | 0.20   | 2.01  | 0.00 |
| TRINITY_DN99352_c11_g1_i1 |       | 1.70   | 3.55   | -1.06 | 0.00 |
| TRINITY_DN99360_c1_g1_i1  | CO1A2 | 140.78 | 62.55  | 1.27  | 0.00 |
| TRINITY_DN99360_c1_g1_i2  | CO1A2 | 99.06  | 51.44  | 1.03  | 0.00 |
| TRINITY_DN99362_c2_g1_i7  | CYH1  | 0.70   | 6.14   | -3.07 | 0.00 |
| TRINITY_DN99363_c2_g1_i4  | EPCAM | 15.41  | 37.73  | -1.36 | 0.00 |
| TRINITY_DN99393_c6_g4_i3  | PAR14 | 4.44   | 9.42   | -1.07 | 0.00 |
| TRINITY_DN99409_c12_g6_i1 |       | 18.65  | 8.63   | 1.17  | 0.00 |

|                          |       |        |        |       |      |
|--------------------------|-------|--------|--------|-------|------|
| TRINITY_DN99413_c2_g3_i1 | SN    | 0.08   | 1.23   | -3.64 | 0.00 |
| TRINITY_DN99446_c2_g2_i1 |       | 12.49  | 31.25  | -1.41 | 0.00 |
| TRINITY_DN99455_c3_g1_i1 |       | 17.74  | 6.37   | 1.60  | 0.00 |
| TRINITY_DN99460_c0_g2_i3 | PCOC1 | 31.03  | 17.07  | 0.85  | 0.00 |
| TRINITY_DN99470_c5_g2_i1 |       | 3.12   | 10.08  | -1.72 | 0.00 |
| TRINITY_DN99470_c5_g2_i2 | VASP  | 46.21  | 182.97 | -1.98 | 0.00 |
| TRINITY_DN99473_c0_g1_i9 | QCR1  | 5.42   | 0.04   | 6.78  | 0.00 |
| TRINITY_DN99474_c6_g2_i2 | PK3CD | 0.51   | 2.33   | -2.18 | 0.00 |
| TRINITY_DN99481_c6_g1_i3 |       | 0.00   | 6.55   | -5.44 | 0.00 |
| TRINITY_DN99510_c0_g1_i2 | S40A1 | 0.80   | 2.41   | -1.58 | 0.00 |
| TRINITY_DN99515_c5_g1_i3 |       | 7.28   | 12.90  | -0.82 | 0.00 |
| TRINITY_DN99530_c4_g2_i8 |       | 2.56   | 6.09   | -1.25 | 0.00 |
| TRINITY_DN99532_c2_g1_i5 |       | 28.25  | 77.34  | -1.46 | 0.00 |
| TRINITY_DN99548_c3_g1_i3 | PRS27 | 284.16 | 45.61  | 2.56  | 0.00 |
| TRINITY_DN99556_c2_g1_i1 |       | 29.41  | 13.00  | 1.24  | 0.00 |
| TRINITY_DN99556_c9_g1_i1 |       | 0.00   | 1.63   | -4.73 | 0.00 |
| TRINITY_DN99568_c4_g1_i1 | CO2A1 | 7.17   | 0.53   | 3.74  | 0.00 |
| TRINITY_DN99568_c5_g5_i6 | FA49A | 1.06   | 4.82   | -2.17 | 0.00 |
| TRINITY_DN99568_c6_g1_i1 | S10A1 | 0.36   | 3.51   | -3.30 | 0.00 |
| TRINITY_DN99578_c0_g1_i2 |       | 3.08   | 10.06  | -1.72 | 0.00 |
| TRINITY_DN99578_c1_g1_i2 | ACTP1 | 123.19 | 67.77  | 0.85  | 0.00 |
| TRINITY_DN99586_c2_g1_i1 |       | 77.95  | 41.67  | 0.92  | 0.00 |
| TRINITY_DN99588_c1_g3_i1 |       | 2.18   | 3.90   | -0.86 | 0.00 |
| TRINITY_DN99608_c2_g1_i1 |       | 0.11   | 1.22   | -3.14 | 0.00 |
| TRINITY_DN99623_c3_g1_i3 |       | 2.90   | 0.00   | 5.94  | 0.00 |
| TRINITY_DN99629_c3_g4_i2 |       | 0.00   | 8.36   | -6.44 | 0.00 |
| TRINITY_DN99644_c2_g1_i1 |       | 0.32   | 4.65   | -3.19 | 0.00 |
| TRINITY_DN99651_c1_g2_i1 | ADH1  | 19.58  | 9.16   | 1.11  | 0.00 |
| TRINITY_DN99655_c1_g1_i1 |       | 2.33   | 4.34   | -0.92 | 0.00 |
| TRINITY_DN99655_c1_g3_i1 |       | 3.36   | 6.08   | -0.88 | 0.00 |
| TRINITY_DN99666_c1_g1_i2 | FGFR4 | 5.20   | 2.58   | 1.03  | 0.00 |
| TRINITY_DN99668_c0_g1_i1 | MEFV  | 0.85   | 10.43  | -3.57 | 0.00 |
| TRINITY_DN99668_c0_g3_i2 | ERMAP | 0.37   | 6.08   | -3.91 | 0.00 |
| TRINITY_DN99676_c3_g2_i1 |       | 0.14   | 1.66   | -3.85 | 0.00 |
| TRINITY_DN99676_c3_g2_i3 |       | 0.67   | 4.33   | -2.63 | 0.00 |
| TRINITY_DN99677_c0_g1_i1 | GPC6  | 3.59   | 1.94   | 0.89  | 0.00 |
| TRINITY_DN99678_c1_g2_i3 | PPIF  | 0.18   | 5.11   | -4.42 | 0.00 |
| TRINITY_DN99686_c2_g1_i1 |       | 2.87   | 0.25   | 3.46  | 0.00 |
| TRINITY_DN99688_c6_g1_i1 | TNR1A | 0.00   | 0.53   | -4.05 | 0.00 |
| TRINITY_DN99688_c7_g2_i2 |       | 0.54   | 3.36   | -2.61 | 0.00 |
| TRINITY_DN99693_c1_g2_i4 | SAP   | 2.76   | 12.11  | -2.13 | 0.00 |
| TRINITY_DN99693_c2_g2_i3 | MYO1F | 0.26   | 1.25   | -2.23 | 0.00 |

|                           |       |         |        |       |      |
|---------------------------|-------|---------|--------|-------|------|
| TRINITY_DN99693_c2_g2_i4  | MYO1F | 3.67    | 8.76   | -1.26 | 0.00 |
| TRINITY_DN99714_c4_g1_i1  | LTC4S | 0.70    | 7.08   | -3.37 | 0.00 |
| TRINITY_DN99714_c4_g1_i5  | LTC4S | 0.23    | 1.89   | -3.02 | 0.00 |
| TRINITY_DN99715_c4_g1_i5  | DEFI6 | 1.97    | 6.48   | -1.74 | 0.00 |
| TRINITY_DN99715_c4_g1_i9  | DEFI6 | 0.15    | 1.94   | -3.57 | 0.00 |
| TRINITY_DN99715_c4_g2_i14 |       | 0.09    | 2.05   | -3.39 | 0.00 |
| TRINITY_DN99724_c6_g1_i2  |       | 0.30    | 2.95   | -3.19 | 0.00 |
| TRINITY_DN99733_c0_g1_i2  | K1C42 | 20.17   | 67.31  | -1.79 | 0.00 |
| TRINITY_DN99748_c2_g1_i9  |       | 1.13    | 0.00   | 5.76  | 0.00 |
| TRINITY_DN99774_c9_g2_i3  | CX6B1 | 1.50    | 6.92   | -2.14 | 0.00 |
| TRINITY_DN99788_c1_g2_i1  | RHG15 | 0.33    | 2.55   | -2.95 | 0.00 |
| TRINITY_DN99793_c1_g1_i1  |       | 1.47    | 18.41  | -3.41 | 0.00 |
| TRINITY_DN99793_c3_g3_i1  |       | 0.37    | 2.15   | -2.30 | 0.00 |
| TRINITY_DN99813_c2_g1_i3  | B4GN3 | 0.00    | 1.03   | -6.40 | 0.00 |
| TRINITY_DN99819_c11_g2_i2 |       | 0.10    | 2.14   | -4.19 | 0.00 |
| TRINITY_DN99823_c3_g1_i1  |       | 0.27    | 6.89   | -4.30 | 0.00 |
| TRINITY_DN99830_c0_g1_i1  | MDM4  | 1.09    | 0.00   | 7.15  | 0.00 |
| TRINITY_DN99837_c2_g1_i4  |       | 0.00    | 2.21   | -5.26 | 0.00 |
| TRINITY_DN99838_c12_g1_i5 | KLDC1 | 0.00    | 1.69   | -5.23 | 0.00 |
| TRINITY_DN99842_c1_g1_i8  | PLCB3 | 0.07    | 1.22   | -3.97 | 0.00 |
| TRINITY_DN99851_c8_g1_i3  |       | 0.00    | 2.87   | -5.56 | 0.00 |
| TRINITY_DN99853_c5_g1_i4  | LOX5  | 0.12    | 4.35   | -5.20 | 0.00 |
| TRINITY_DN99853_c5_g1_i8  |       | 0.23    | 2.74   | -3.17 | 0.00 |
| TRINITY_DN99895_c2_g4_i1  | TRFE  | 29.78   | 3.71   | 3.06  | 0.00 |
| TRINITY_DN99898_c0_g3_i16 | TVA3  | 0.07    | 1.40   | -3.47 | 0.00 |
| TRINITY_DN99902_c4_g2_i3  | ZG16  | 1566.94 | 469.47 | 1.64  | 0.00 |
| TRINITY_DN99908_c0_g1_i1  |       | 4.31    | 8.92   | -1.06 | 0.00 |
| TRINITY_DN99908_c0_g3_i1  |       | 1.98    | 10.79  | -2.48 | 0.00 |
| TRINITY_DN99908_c0_g4_i2  |       | 1.07    | 4.13   | -1.92 | 0.00 |
| TRINITY_DN99910_c8_g8_i1  | IL16  | 3.85    | 8.78   | -1.19 | 0.00 |
| TRINITY_DN99917_c0_g1_i9  | HMR1  | 0.89    | 4.37   | -2.27 | 0.00 |
| TRINITY_DN99921_c1_g1_i5  | SCAR3 | 0.85    | 0.02   | 5.28  | 0.00 |
| TRINITY_DN99933_c3_g4_i2  |       | 0.36    | 4.60   | -3.46 | 0.00 |
| TRINITY_DN99948_c3_g1_i16 | TNR5  | 0.24    | 1.75   | -2.85 | 0.00 |
| TRINITY_DN99948_c3_g1_i8  |       | 0.28    | 1.70   | -2.67 | 0.00 |
| TRINITY_DN99988_c2_g1_i4  | IP6K2 | 8.68    | 13.72  | -0.67 | 0.00 |
| TRINITY_DN99993_c0_g2_i1  | SOX9  | 16.17   | 26.12  | -0.70 | 0.00 |
| TRINITY_DN99993_c0_g3_i4  | SOX8  | 0.24    | 2.61   | -3.38 | 0.00 |
| TRINITY_DN99997_c1_g2_i2  |       | 0.00    | 2.81   | -5.11 | 0.00 |
| TRINITY_DN99999_c0_g2_i2  | FLNC  | 4.32    | 1.89   | 1.22  | 0.00 |



**Table S2.** List of the differentially expressed genes of the fin in yamame

| Gene_id                    | Annotation | HT_TPM | NT_TPM | log2(FoldChange) | P - value |
|----------------------------|------------|--------|--------|------------------|-----------|
| TRINITY_DN100010_c5_g1_i4  | SAP        | 0.06   | 3.27   | -6.51            | 0.00      |
| TRINITY_DN100020_c2_g1_i5  | CO3        | 4.83   | 0.04   | 3.11             | 0.00      |
| TRINITY_DN100136_c3_g1_i1  |            | 0.49   | 7.06   | -3.90            | 0.00      |
| TRINITY_DN100181_c1_g1_i1  | URGCP      | 0.00   | 1.42   | -6.21            | 0.00      |
| TRINITY_DN100207_c2_g4_i6  | FREM1      | 1.05   | 7.17   | -2.77            | 0.00      |
| TRINITY_DN100244_c5_g4_i2  | SEPT2      | 8.11   | 0.00   | 7.16             | 0.00      |
| TRINITY_DN100245_c1_g1_i5  | SF3B1      | 9.00   | 15.12  | -0.78            | 0.00      |
| TRINITY_DN100251_c1_g1_i14 | DDX17      | 1.29   | 3.76   | -1.57            | 0.00      |
| TRINITY_DN100257_c2_g1_i1  | VIME       | 5.15   | 11.93  | -1.25            | 0.00      |
| TRINITY_DN100260_c3_g3_i1  | AGRG4      | 1.08   | 7.20   | -2.79            | 0.00      |
| TRINITY_DN100264_c1_g2_i4  |            | 0.00   | 1.78   | -6.12            | 0.00      |
| TRINITY_DN100293_c2_g1_i4  | CNFB       | 61.37  | 26.65  | 1.17             | 0.00      |
| TRINITY_DN100304_c4_g2_i20 | GIMA4      | 2.41   | 9.66   | -2.01            | 0.00      |
| TRINITY_DN100329_c2_g1_i1  |            | 0.00   | 5.07   | -22.65           | 0.00      |
| TRINITY_DN100358_c1_g2_i13 | MUC2L      | 0.92   | 10.54  | -3.59            | 0.00      |
| TRINITY_DN100358_c1_g2_i16 | MUC5B      | 0.83   | 0.00   | 5.14             | 0.00      |
| TRINITY_DN100358_c1_g2_i6  | MUC2L      | 57.10  | 26.80  | 1.04             | 0.00      |
| TRINITY_DN100392_c2_g1_i5  | SYVC       | 0.00   | 0.83   | -5.83            | 0.00      |
| TRINITY_DN100422_c0_g2_i3  | TBB        | 10.05  | 18.22  | -0.91            | 0.00      |
| TRINITY_DN100423_c1_g1_i1  | KIF4       | 1.57   | 0.20   | 2.92             | 0.00      |
| TRINITY_DN100423_c1_g1_i5  | KIF4       | 1.39   | 0.32   | 2.05             | 0.00      |
| TRINITY_DN100481_c2_g1_i7  | M3K5       | 1.21   | 0.00   | 7.10             | 0.00      |
| TRINITY_DN100483_c2_g1_i12 | RGL2       | 2.67   | 0.05   | 5.51             | 0.00      |
| TRINITY_DN100513_c1_g4_i2  |            | 0.22   | 1.54   | -2.85            | 0.00      |
| TRINITY_DN100533_c1_g1_i9  | COBA2      | 0.02   | 2.97   | -5.02            | 0.00      |
| TRINITY_DN100572_c1_g2_i3  | GVIN1      | 0.01   | 5.15   | -7.23            | 0.00      |
| TRINITY_DN100589_c6_g3_i1  |            | 0.00   | 2.10   | -6.47            | 0.00      |
| TRINITY_DN100642_c5_g1_i14 | SESN1      | 14.32  | 32.05  | -1.18            | 0.00      |
| TRINITY_DN100645_c2_g2_i1  | GCN1       | 3.52   | 2.04   | 0.74             | 0.00      |
| TRINITY_DN100647_c0_g1_i1  |            | 0.54   | 1.31   | -1.29            | 0.00      |
| TRINITY_DN100662_c1_g2_i4  |            | 0.03   | 2.36   | -5.85            | 0.00      |
| TRINITY_DN100667_c3_g2_i1  |            | 5.11   | 14.84  | -1.58            | 0.00      |
| TRINITY_DN100677_c8_g4_i4  |            | 0.00   | 11.83  | -6.90            | 0.00      |
| TRINITY_DN100705_c5_g6_i1  | ETS2       | 35.42  | 57.06  | -0.71            | 0.00      |
| TRINITY_DN100727_c2_g1_i7  | RL7        | 23.12  | 77.70  | -1.80            | 0.00      |
| TRINITY_DN100748_c6_g2_i1  | FYCO1      | 2.73   | 0.09   | 4.94             | 0.00      |
| TRINITY_DN100748_c6_g2_i2  | FYCO1      | 0.00   | 1.03   | -5.13            | 0.00      |
| TRINITY_DN100789_c4_g1_i1  | LRBA       | 4.63   | 3.35   | 0.44             | 0.00      |
| TRINITY_DN100824_c3_g2_i3  | CADH1      | 15.44  | 5.76   | 1.37             | 0.00      |

|                            |       |       |       |       |      |
|----------------------------|-------|-------|-------|-------|------|
| TRINITY_DN100858_c5_g3_i3  |       | 6.51  | 2.43  | 1.34  | 0.00 |
| TRINITY_DN100867_c1_g2_i5  |       | 1.73  | 7.01  | -2.04 | 0.00 |
| TRINITY_DN100914_c0_g1_i3  |       | 0.01  | 2.10  | -7.52 | 0.00 |
| TRINITY_DN100914_c0_g1_i6  |       | 1.72  | 0.01  | 6.56  | 0.00 |
| TRINITY_DN100917_c9_g1_i1  |       | 1.33  | 9.18  | -2.89 | 0.00 |
| TRINITY_DN100926_c2_g1_i1  | SPTB2 | 0.01  | 1.38  | -6.13 | 0.00 |
| TRINITY_DN100939_c26_g1_i1 | LMO7  | 0.00  | 1.78  | -7.10 | 0.00 |
| TRINITY_DN100968_c2_g1_i1  | TF29  | 5.04  | 9.08  | -0.90 | 0.00 |
| TRINITY_DN100975_c9_g1_i1  |       | 1.04  | 6.33  | -2.68 | 0.00 |
| TRINITY_DN100982_c0_g1_i1  |       | 5.18  | 16.24 | -1.68 | 0.00 |
| TRINITY_DN104860_c0_g1_i1  | RM02  | 9.93  | 5.53  | 0.81  | 0.00 |
| TRINITY_DN40439_c0_g1_i1   | HDAC6 | 9.42  | 1.63  | 2.47  | 0.00 |
| TRINITY_DN47095_c0_g1_i1   | UB4AA | 8.59  | 0.45  | 4.06  | 0.00 |
| TRINITY_DN61670_c0_g1_i1   |       | 4.94  | 40.96 | -3.07 | 0.00 |
| TRINITY_DN69452_c0_g1_i1   |       | 14.98 | 40.32 | -1.47 | 0.00 |
| TRINITY_DN69646_c0_g1_i1   |       | 0.49  | 1.89  | -1.94 | 0.00 |
| TRINITY_DN71263_c0_g1_i1   | PSMD8 | 34.06 | 21.42 | 0.63  | 0.00 |
| TRINITY_DN71883_c0_g1_i1   |       | 28.67 | 65.00 | -1.21 | 0.00 |
| TRINITY_DN74129_c0_g1_i3   | TRFE  | 47.69 | 0.92  | 4.02  | 0.00 |
| TRINITY_DN75674_c0_g1_i2   | PFD6  | 25.97 | 14.53 | 0.80  | 0.00 |
| TRINITY_DN76007_c0_g1_i1   | PSB7  | 45.37 | 25.04 | 0.82  | 0.00 |
| TRINITY_DN76786_c0_g1_i1   |       | 0.19  | 1.63  | -3.33 | 0.00 |
| TRINITY_DN78369_c0_g1_i1   |       | 0.00  | 2.19  | -4.79 | 0.00 |
| TRINITY_DN78571_c0_g1_i1   |       | 7.13  | 37.19 | -2.42 | 0.00 |
| TRINITY_DN79151_c0_g1_i1   | SELK  | 11.70 | 1.05  | 3.47  | 0.00 |
| TRINITY_DN79306_c0_g1_i2   |       | 31.92 | 86.52 | -1.48 | 0.00 |
| TRINITY_DN79748_c0_g1_i1   | CREM  | 0.14  | 1.61  | -3.60 | 0.00 |
| TRINITY_DN80077_c0_g1_i2   |       | 0.75  | 5.13  | -2.84 | 0.00 |
| TRINITY_DN80443_c0_g2_i2   |       | 0.09  | 1.10  | -3.75 | 0.00 |
| TRINITY_DN80730_c0_g1_i1   |       | 14.13 | 0.57  | 3.97  | 0.00 |
| TRINITY_DN80955_c0_g1_i1   |       | 1.15  | 22.04 | -4.26 | 0.00 |
| TRINITY_DN81005_c0_g1_i1   | ANR22 | 5.92  | 10.02 | -0.81 | 0.00 |
| TRINITY_DN81011_c0_g1_i1   | SGO2  | 0.97  | 0.26  | 1.92  | 0.00 |
| TRINITY_DN81400_c0_g1_i4   | ECHM  | 12.21 | 7.09  | 0.76  | 0.00 |
| TRINITY_DN81585_c0_g1_i1   |       | 4.23  | 1.20  | 1.80  | 0.00 |
| TRINITY_DN81687_c0_g2_i2   | IF43B | 2.19  | 0.37  | 2.32  | 0.00 |
| TRINITY_DN81765_c0_g1_i3   |       | 2.02  | 0.29  | 2.72  | 0.00 |
| TRINITY_DN81792_c0_g1_i1   |       | 3.86  | 1.37  | 1.52  | 0.00 |
| TRINITY_DN81968_c0_g1_i1   | TOP2A | 7.20  | 2.03  | 1.80  | 0.00 |
| TRINITY_DN81970_c0_g1_i1   |       | 3.91  | 0.99  | 1.91  | 0.00 |
| TRINITY_DN82062_c0_g1_i1   | SELT2 | 26.85 | 20.19 | 0.38  | 0.00 |
| TRINITY_DN82358_c5_g1_i1   | SOCS3 | 11.53 | 28.87 | -1.37 | 0.00 |

|                           |       |        |        |       |      |
|---------------------------|-------|--------|--------|-------|------|
| TRINITY_DN82358_c5_g1_i2  | SOCS3 | 17.82  | 49.81  | -1.52 | 0.00 |
| TRINITY_DN82408_c0_g1_i3  | MUC5B | 4.06   | 0.35   | 3.42  | 0.00 |
| TRINITY_DN82426_c0_g1_i1  |       | 0.55   | 15.86  | -4.39 | 0.00 |
| TRINITY_DN82433_c0_g1_i2  | SNX27 | 2.32   | 8.74   | -1.95 | 0.00 |
| TRINITY_DN82488_c0_g1_i1  | HG2A  | 50.35  | 86.88  | -0.83 | 0.00 |
| TRINITY_DN82864_c0_g3_i1  | EVL   | 0.34   | 1.49   | -2.08 | 0.00 |
| TRINITY_DN82946_c0_g1_i2  |       | 0.37   | 3.50   | -3.35 | 0.00 |
| TRINITY_DN82967_c0_g1_i1  | SYAC  | 8.95   | 4.22   | 1.03  | 0.00 |
| TRINITY_DN83096_c0_g1_i1  |       | 3.50   | 19.03  | -2.49 | 0.00 |
| TRINITY_DN83194_c0_g1_i1  | TPSN  | 6.22   | 11.72  | -0.94 | 0.00 |
| TRINITY_DN83200_c0_g1_i1  | IEX1  | 9.89   | 30.24  | -1.65 | 0.00 |
| TRINITY_DN83214_c0_g2_i1  |       | 0.31   | 14.23  | -4.30 | 0.00 |
| TRINITY_DN83214_c0_g2_i2  |       | 0.79   | 19.70  | -4.63 | 0.00 |
| TRINITY_DN83259_c8_g3_i2  |       | 1.30   | 8.73   | -2.93 | 0.00 |
| TRINITY_DN83284_c0_g1_i3  |       | 10.23  | 0.00   | 6.79  | 0.00 |
| TRINITY_DN83380_c2_g2_i1  |       | 0.78   | 4.93   | -2.67 | 0.00 |
| TRINITY_DN83411_c0_g2_i1  | RLP24 | 113.95 | 179.06 | -0.69 | 0.00 |
| TRINITY_DN83666_c1_g1_i1  | ID1   | 46.70  | 67.96  | -0.58 | 0.00 |
| TRINITY_DN83738_c0_g1_i3  |       | 3.91   | 23.41  | -2.75 | 0.00 |
| TRINITY_DN83824_c0_g1_i1  | HIG2A | 16.92  | 9.32   | 0.80  | 0.00 |
| TRINITY_DN83832_c0_g2_i1  | JUN   | 10.02  | 18.19  | -0.89 | 0.00 |
| TRINITY_DN83840_c5_g2_i1  |       | 0.67   | 7.69   | -3.42 | 0.00 |
| TRINITY_DN83910_c0_g1_i1  | MPP6  | 0.83   | 0.11   | 3.19  | 0.00 |
| TRINITY_DN83919_c0_g1_i2  |       | 6.48   | 0.00   | 7.07  | 0.00 |
| TRINITY_DN83925_c1_g1_i1  |       | 0.00   | 0.78   | -4.71 | 0.00 |
| TRINITY_DN84026_c8_g1_i1  |       | 0.39   | 3.04   | -2.98 | 0.00 |
| TRINITY_DN84054_c1_g3_i9  | KI67  | 3.22   | 0.00   | 7.73  | 0.00 |
| TRINITY_DN84061_c4_g9_i1  | CALM  | 70.40  | 40.88  | 0.74  | 0.00 |
| TRINITY_DN84101_c1_g1_i10 | TBB   | 1.06   | 4.71   | -2.17 | 0.00 |
| TRINITY_DN84180_c4_g3_i1  |       | 9.40   | 0.20   | 4.31  | 0.00 |
| TRINITY_DN84180_c5_g2_i1  | EGR1  | 17.58  | 65.81  | -1.97 | 0.00 |
| TRINITY_DN84180_c5_g3_i1  | EGR1  | 3.40   | 17.11  | -2.36 | 0.00 |
| TRINITY_DN84265_c9_g2_i9  | K1C42 | 21.79  | 58.88  | -1.51 | 0.00 |
| TRINITY_DN84393_c6_g1_i11 |       | 0.37   | 6.61   | -4.08 | 0.00 |
| TRINITY_DN84397_c0_g1_i3  |       | 52.56  | 18.39  | 1.45  | 0.00 |
| TRINITY_DN84400_c8_g1_i3  |       | 22.81  | 2.85   | 2.84  | 0.00 |
| TRINITY_DN84404_c4_g1_i1  | SIA4B | 2.28   | 0.36   | 2.64  | 0.00 |
| TRINITY_DN84482_c0_g1_i1  | ANO8  | 0.41   | 2.18   | -2.43 | 0.00 |
| TRINITY_DN84498_c0_g1_i3  | IGSF6 | 1.81   | 0.14   | 3.45  | 0.00 |
| TRINITY_DN84521_c7_g2_i2  |       | 0.00   | 2.22   | -5.84 | 0.00 |
| TRINITY_DN84538_c3_g2_i2  |       | 3.51   | 7.40   | -1.10 | 0.00 |
| TRINITY_DN84538_c3_g8_i1  |       | 2.01   | 13.32  | -2.54 | 0.00 |

|                           |       |        |        |       |      |
|---------------------------|-------|--------|--------|-------|------|
| TRINITY_DN84621_c4_g2_i3  | CCL28 | 236.06 | 372.04 | -0.70 | 0.00 |
| TRINITY_DN84655_c3_g8_i3  |       | 0.49   | 3.25   | -2.80 | 0.00 |
| TRINITY_DN84673_c4_g1_i7  | RAB25 | 0.00   | 9.73   | -8.82 | 0.00 |
| TRINITY_DN84694_c1_g1_i1  | PRS6B | 11.81  | 7.03   | 0.70  | 0.00 |
| TRINITY_DN84716_c5_g1_i1  | BSPRY | 0.01   | 0.48   | -4.51 | 0.00 |
| TRINITY_DN84751_c3_g1_i5  |       | 0.00   | 1.23   | -5.14 | 0.00 |
| TRINITY_DN84758_c0_g1_i2  | CY1   | 0.00   | 10.06  | -8.36 | 0.00 |
| TRINITY_DN84823_c3_g1_i2  |       | 2.23   | 9.91   | -2.24 | 0.00 |
| TRINITY_DN84833_c0_g1_i1  |       | 0.00   | 1.90   | -6.05 | 0.00 |
| TRINITY_DN84842_c0_g1_i3  | ACBD6 | 3.99   | 1.75   | 1.16  | 0.00 |
| TRINITY_DN84871_c1_g1_i2  | SOX3  | 7.98   | 14.40  | -0.90 | 0.00 |
| TRINITY_DN84877_c4_g1_i2  |       | 0.03   | 2.17   | -4.97 | 0.00 |
| TRINITY_DN84879_c1_g2_i1  |       | 20.58  | 1.12   | 4.45  | 0.00 |
| TRINITY_DN84879_c1_g3_i1  |       | 202.52 | 16.55  | 3.70  | 0.00 |
| TRINITY_DN84937_c0_g1_i5  | HMR1  | 0.05   | 41.75  | -9.97 | 0.00 |
| TRINITY_DN84940_c1_g1_i1  |       | 19.53  | 33.06  | -0.79 | 0.00 |
| TRINITY_DN84947_c4_g2_i1  |       | 1.26   | 3.61   | -1.55 | 0.00 |
| TRINITY_DN84956_c4_g1_i1  |       | 0.35   | 1.99   | -2.80 | 0.00 |
| TRINITY_DN84957_c0_g3_i3  | RECQ4 | 1.24   | 0.23   | 2.32  | 0.00 |
| TRINITY_DN84977_c0_g1_i1  | JUN   | 5.87   | 13.14  | -1.20 | 0.00 |
| TRINITY_DN85027_c3_g1_i3  | PHLA2 | 10.35  | 22.93  | -1.20 | 0.00 |
| TRINITY_DN85073_c1_g1_i1  |       | 491.22 | 191.53 | 1.30  | 0.00 |
| TRINITY_DN85095_c1_g2_i1  |       | 1.05   | 5.37   | -2.51 | 0.00 |
| TRINITY_DN85112_c3_g4_i1  |       | 0.31   | 2.14   | -2.81 | 0.00 |
| TRINITY_DN85115_c6_g2_i2  | RS12  | 516.07 | 245.14 | 1.05  | 0.00 |
| TRINITY_DN85122_c4_g7_i1  |       | 112.12 | 567.44 | -2.38 | 0.00 |
| TRINITY_DN85123_c6_g1_i3  | SELH  | 17.16  | 7.75   | 1.09  | 0.00 |
| TRINITY_DN85131_c0_g1_i3  | HB2D  | 18.98  | 43.44  | -1.21 | 0.00 |
| TRINITY_DN85138_c5_g4_i2  |       | 0.09   | 6.77   | -5.91 | 0.00 |
| TRINITY_DN85168_c0_g1_i1  |       | 0.49   | 7.65   | -4.00 | 0.00 |
| TRINITY_DN85178_c3_g1_i13 |       | 9.17   | 1.00   | 4.47  | 0.00 |
| TRINITY_DN85208_c0_g1_i2  | CCL20 | 0.34   | 3.31   | -3.39 | 0.00 |
| TRINITY_DN85239_c7_g1_i1  | HIG1A | 14.62  | 5.71   | 1.31  | 0.00 |
| TRINITY_DN85279_c0_g1_i2  |       | 14.44  | 64.86  | -2.16 | 0.00 |
| TRINITY_DN85303_c0_g1_i1  | ODO1  | 9.91   | 6.25   | 0.64  | 0.00 |
| TRINITY_DN85377_c7_g1_i6  | SYFB  | 13.50  | 7.60   | 0.79  | 0.00 |
| TRINITY_DN85418_c4_g2_i6  | ZBT26 | 0.01   | 0.71   | -6.25 | 0.00 |
| TRINITY_DN85460_c0_g1_i2  | SAA5  | 82.56  | 7.07   | 3.63  | 0.00 |
| TRINITY_DN85461_c3_g1_i1  |       | 2.62   | 16.10  | -2.67 | 0.00 |
| TRINITY_DN85519_c5_g2_i4  | PROF2 | 0.55   | 5.74   | -3.36 | 0.00 |
| TRINITY_DN85557_c6_g1_i4  | P73   | 1.34   | 0.00   | 22.72 | 0.00 |
| TRINITY_DN85579_c0_g2_i2  | IF44L | 0.00   | 1.00   | -5.46 | 0.00 |

|                           |       |       |       |       |      |
|---------------------------|-------|-------|-------|-------|------|
| TRINITY_DN85579_c0_g2_i5  | IF44L | 0.00  | 1.54  | -6.06 | 0.00 |
| TRINITY_DN85579_c0_g2_i6  | IF44L | 0.07  | 2.86  | -5.25 | 0.00 |
| TRINITY_DN85579_c0_g2_i8  | IF44L | 0.04  | 5.55  | -6.79 | 0.00 |
| TRINITY_DN85591_c4_g1_i2  | CND2  | 5.33  | 1.66  | 1.63  | 0.00 |
| TRINITY_DN85606_c1_g1_i4  |       | 1.26  | 2.40  | -0.96 | 0.00 |
| TRINITY_DN85619_c1_g2_i1  | GNA14 | 1.15  | 4.03  | -1.83 | 0.00 |
| TRINITY_DN85652_c6_g1_i2  | PPIC  | 1.27  | 2.90  | -1.24 | 0.00 |
| TRINITY_DN85696_c0_g1_i2  | TAGAP | 0.95  | 2.01  | -1.11 | 0.00 |
| TRINITY_DN85741_c4_g1_i1  |       | 3.43  | 1.44  | 1.22  | 0.00 |
| TRINITY_DN85741_c5_g3_i1  |       | 48.28 | 9.69  | 2.30  | 0.00 |
| TRINITY_DN85749_c0_g1_i9  | REG1B | 0.06  | 2.04  | -4.66 | 0.00 |
| TRINITY_DN85775_c1_g1_i2  |       | 2.06  | 14.44 | -2.78 | 0.00 |
| TRINITY_DN85807_c4_g1_i2  | GATA2 | 1.21  | 0.00  | 4.28  | 0.00 |
| TRINITY_DN85815_c3_g4_i3  |       | 0.20  | 2.03  | -3.34 | 0.00 |
| TRINITY_DN85837_c2_g1_i2  | MD2L1 | 5.67  | 2.07  | 1.39  | 0.00 |
| TRINITY_DN85882_c0_g2_i2  | UROK  | 22.00 | 37.29 | -0.79 | 0.00 |
| TRINITY_DN85929_c2_g1_i1  |       | 0.00  | 3.13  | -5.03 | 0.00 |
| TRINITY_DN85929_c2_g4_i2  | HG2A  | 3.98  | 85.46 | -4.46 | 0.00 |
| TRINITY_DN85965_c8_g1_i1  |       | 6.41  | 1.25  | 2.33  | 0.00 |
| TRINITY_DN85991_c1_g1_i1  |       | 26.22 | 86.84 | -1.79 | 0.00 |
| TRINITY_DN85999_c4_g2_i7  | SRS11 | 12.12 | 5.75  | 1.06  | 0.00 |
| TRINITY_DN86069_c6_g1_i4  | UBL5  | 3.83  | 0.43  | 3.36  | 0.00 |
| TRINITY_DN86079_c2_g1_i7  | PLPP3 | 5.81  | 0.28  | 4.51  | 0.00 |
| TRINITY_DN86088_c1_g1_i2  | EMIL2 | 0.00  | 5.93  | -8.86 | 0.00 |
| TRINITY_DN86088_c1_g1_i5  | EMIL2 | 0.00  | 1.01  | -6.28 | 0.00 |
| TRINITY_DN86135_c4_g4_i2  |       | 0.00  | 9.91  | -5.76 | 0.00 |
| TRINITY_DN86162_c5_g1_i2  |       | 1.24  | 12.54 | -3.54 | 0.00 |
| TRINITY_DN86176_c10_g1_i2 |       | 1.05  | 6.26  | -2.65 | 0.00 |
| TRINITY_DN86229_c5_g1_i1  | TM14C | 21.14 | 8.98  | 1.25  | 0.00 |
| TRINITY_DN86283_c1_g1_i3  |       | 0.00  | 2.68  | -5.18 | 0.00 |
| TRINITY_DN86299_c14_g1_i1 |       | 8.30  | 1.06  | 2.86  | 0.00 |
| TRINITY_DN86325_c7_g1_i1  | ALKMO | 1.41  | 4.62  | -1.73 | 0.00 |
| TRINITY_DN86332_c2_g1_i2  |       | 0.68  | 6.53  | -3.37 | 0.00 |
| TRINITY_DN86332_c2_g7_i1  |       | 1.52  | 7.40  | -2.31 | 0.00 |
| TRINITY_DN86357_c2_g1_i2  | CLD3  | 5.37  | 15.48 | -1.56 | 0.00 |
| TRINITY_DN86357_c2_g2_i4  | CLD4  | 13.60 | 26.00 | -0.97 | 0.00 |
| TRINITY_DN86370_c0_g1_i4  | TRAK2 | 2.67  | 0.25  | 3.28  | 0.00 |
| TRINITY_DN86405_c0_g1_i8  | IRF1  | 0.81  | 6.03  | -2.95 | 0.00 |
| TRINITY_DN86447_c8_g2_i1  |       | 0.13  | 2.36  | -4.80 | 0.00 |
| TRINITY_DN86451_c0_g1_i8  | YBX2B | 0.00  | 0.72  | -4.86 | 0.00 |
| TRINITY_DN86458_c2_g1_i5  | BIN3  | 0.00  | 2.32  | -7.13 | 0.00 |
| TRINITY_DN86486_c0_g1_i7  |       | 0.33  | 3.66  | -3.43 | 0.00 |

|                           |       |        |        |        |      |
|---------------------------|-------|--------|--------|--------|------|
| TRINITY_DN86491_c3_g3_i4  |       | 0.03   | 1.45   | -4.44  | 0.00 |
| TRINITY_DN86499_c4_g3_i1  | PLD3B | 10.47  | 6.30   | 0.71   | 0.00 |
| TRINITY_DN86520_c2_g2_i1  |       | 0.30   | 2.08   | -2.83  | 0.00 |
| TRINITY_DN86530_c1_g2_i17 |       | 2.58   | 0.07   | 4.40   | 0.00 |
| TRINITY_DN86541_c2_g2_i2  |       | 3.66   | 8.57   | -1.29  | 0.00 |
| TRINITY_DN86545_c2_g2_i4  |       | 17.82  | 8.12   | 1.08   | 0.00 |
| TRINITY_DN86554_c7_g1_i7  | CDO1  | 0.00   | 0.64   | -4.61  | 0.00 |
| TRINITY_DN86570_c9_g4_i1  | APOC1 | 302.55 | 28.52  | 1.50   | 0.00 |
| TRINITY_DN86608_c0_g1_i2  | TRAP1 | 2.14   | 0.10   | 4.24   | 0.00 |
| TRINITY_DN86688_c6_g1_i7  | CD82  | 0.00   | 11.12  | -8.18  | 0.00 |
| TRINITY_DN86724_c8_g1_i1  |       | 0.94   | 3.12   | -1.80  | 0.00 |
| TRINITY_DN86741_c2_g1_i4  | GFPT1 | 6.11   | 0.00   | 6.24   | 0.00 |
| TRINITY_DN86743_c6_g3_i1  | ARCH  | 11.04  | 5.80   | 0.90   | 0.00 |
| TRINITY_DN86745_c2_g2_i1  | S27A4 | 0.96   | 0.10   | 3.12   | 0.00 |
| TRINITY_DN86763_c1_g3_i1  | H2AZ  | 30.56  | 11.07  | 1.41   | 0.00 |
| TRINITY_DN86795_c0_g1_i1  |       | 0.09   | 7.83   | -5.86  | 0.00 |
| TRINITY_DN86798_c0_g2_i3  |       | 0.47   | 3.42   | -3.18  | 0.00 |
| TRINITY_DN86880_c4_g1_i2  |       | 0.44   | 4.38   | -3.41  | 0.00 |
| TRINITY_DN86905_c6_g2_i1  | I20RB | 1.36   | 0.07   | 3.97   | 0.00 |
| TRINITY_DN86909_c11_g1_i2 | SNX3  | 21.76  | 14.49  | 0.54   | 0.00 |
| TRINITY_DN86920_c9_g1_i1  | GSTA  | 45.89  | 28.72  | 0.65   | 0.00 |
| TRINITY_DN86957_c1_g2_i3  |       | 1.55   | 0.00   | 4.38   | 0.00 |
| TRINITY_DN86967_c0_g3_i1  | DMXL2 | 0.74   | 0.00   | 5.66   | 0.00 |
| TRINITY_DN87061_c0_g1_i1  | CEBPD | 47.74  | 84.38  | -0.85  | 0.00 |
| TRINITY_DN87061_c0_g1_i2  | CEBPD | 62.90  | 113.90 | -0.88  | 0.00 |
| TRINITY_DN87071_c4_g1_i3  |       | 1.80   | 7.26   | -2.03  | 0.00 |
| TRINITY_DN87135_c1_g1_i2  |       | 0.00   | 26.26  | -10.06 | 0.00 |
| TRINITY_DN87135_c1_g1_i3  |       | 0.00   | 26.80  | -10.42 | 0.00 |
| TRINITY_DN87143_c8_g2_i4  | RAB10 | 0.00   | 4.34   | -7.71  | 0.00 |
| TRINITY_DN87259_c3_g2_i2  | MYOC  | 0.01   | 11.37  | -8.77  | 0.00 |
| TRINITY_DN87267_c0_g1_i1  | PGRP2 | 4.80   | 8.62   | -0.88  | 0.00 |
| TRINITY_DN87275_c0_g1_i1  |       | 0.25   | 1.52   | -2.63  | 0.00 |
| TRINITY_DN87278_c10_g2_i2 |       | 3.35   | 13.69  | -2.09  | 0.00 |
| TRINITY_DN87380_c0_g1_i5  |       | 2.08   | 0.00   | 4.73   | 0.00 |
| TRINITY_DN87457_c3_g3_i3  |       | 14.90  | 31.17  | -1.09  | 0.00 |
| TRINITY_DN87460_c2_g3_i1  |       | 4.38   | 0.21   | 4.18   | 0.00 |
| TRINITY_DN87464_c10_g2_i1 |       | 6.37   | 2.33   | 1.40   | 0.00 |
| TRINITY_DN87514_c4_g2_i2  | FAP24 | 4.71   | 2.64   | 0.79   | 0.00 |
| TRINITY_DN87527_c4_g1_i8  |       | 0.14   | 2.34   | -4.01  | 0.00 |
| TRINITY_DN87531_c3_g1_i3  | TNNI1 | 4.31   | 15.66  | -1.93  | 0.00 |
| TRINITY_DN87581_c3_g1_i2  |       | 2.36   | 0.16   | 3.30   | 0.00 |
| TRINITY_DN87614_c5_g2_i1  |       | 3.76   | 10.80  | -1.56  | 0.00 |

|                           |       |        |         |       |      |
|---------------------------|-------|--------|---------|-------|------|
| TRINITY_DN87617_c6_g1_i2  | RAB32 | 1.02   | 0.04    | 4.09  | 0.00 |
| TRINITY_DN87640_c1_g1_i9  | RAB9A | 1.31   | 0.17    | 3.13  | 0.00 |
| TRINITY_DN87687_c5_g1_i12 | IKBA  | 12.98  | 26.31   | -1.05 | 0.00 |
| TRINITY_DN87687_c5_g1_i13 | IKBA  | 2.97   | 7.20    | -1.30 | 0.00 |
| TRINITY_DN87687_c5_g1_i18 | IKBA  | 10.34  | 23.16   | -1.18 | 0.00 |
| TRINITY_DN87687_c5_g1_i2  | IKBA  | 24.34  | 56.84   | -1.27 | 0.00 |
| TRINITY_DN87697_c3_g2_i3  | A9A1A | 2.84   | 0.00    | 7.08  | 0.00 |
| TRINITY_DN87697_c3_g2_i4  | A9A1A | 2.73   | 0.00    | 6.77  | 0.00 |
| TRINITY_DN87700_c3_g1_i5  |       | 0.00   | 3.44    | -5.49 | 0.00 |
| TRINITY_DN87720_c0_g1_i6  | COPT1 | 0.77   | 0.02    | 4.62  | 0.00 |
| TRINITY_DN87762_c0_g1_i6  | BRPF3 | 0.94   | 0.13    | 2.91  | 0.00 |
| TRINITY_DN87764_c2_g1_i1  | CCL25 | 120.14 | 199.44  | -0.75 | 0.00 |
| TRINITY_DN87830_c1_g1_i8  | CD9   | 0.04   | 2.54    | -5.58 | 0.00 |
| TRINITY_DN87883_c3_g3_i1  |       | 64.78  | 40.69   | 0.63  | 0.00 |
| TRINITY_DN87934_c5_g2_i4  |       | 764.74 | 1506.09 | -1.03 | 0.00 |
| TRINITY_DN87934_c5_g2_i5  |       | 406.38 | 1142.80 | -1.55 | 0.00 |
| TRINITY_DN87951_c7_g5_i2  |       | 0.11   | 4.39    | -4.31 | 0.00 |
| TRINITY_DN87952_c0_g1_i1  | KV315 | 0.54   | 3.16    | -2.65 | 0.00 |
| TRINITY_DN87952_c0_g1_i2  |       | 0.45   | 2.03    | -2.26 | 0.00 |
| TRINITY_DN87956_c4_g1_i2  |       | 1.50   | 3.78    | -1.34 | 0.00 |
| TRINITY_DN88074_c3_g1_i1  | HG2A  | 24.64  | 66.67   | -1.49 | 0.00 |
| TRINITY_DN88074_c3_g2_i1  | HG2A  | 168.88 | 476.71  | -1.55 | 0.00 |
| TRINITY_DN88076_c0_g1_i15 |       | 14.61  | 0.00    | 5.60  | 0.00 |
| TRINITY_DN88076_c0_g2_i2  |       | 13.16  | 0.76    | 4.06  | 0.00 |
| TRINITY_DN88115_c4_g2_i1  |       | 6.73   | 11.11   | -0.75 | 0.00 |
| TRINITY_DN88140_c5_g1_i1  |       | 73.30  | 5.01    | 2.61  | 0.00 |
| TRINITY_DN88160_c4_g1_i1  |       | 5.48   | 1.10    | 2.22  | 0.00 |
| TRINITY_DN88167_c1_g1_i1  | CD3E  | 2.43   | 5.06    | -1.11 | 0.00 |
| TRINITY_DN88170_c5_g3_i1  | CX023 | 0.10   | 3.39    | -4.64 | 0.00 |
| TRINITY_DN88183_c5_g4_i1  | CH25H | 6.34   | 14.57   | -1.24 | 0.00 |
| TRINITY_DN88246_c3_g2_i1  |       | 2.10   | 18.93   | -3.21 | 0.00 |
| TRINITY_DN88257_c1_g4_i1  | AMOT  | 0.00   | 0.54    | -5.91 | 0.00 |
| TRINITY_DN88261_c1_g1_i7  |       | 0.03   | 0.81    | -4.09 | 0.00 |
| TRINITY_DN88269_c1_g1_i1  | PGRP2 | 3.00   | 0.63    | 2.22  | 0.00 |
| TRINITY_DN88270_c1_g1_i1  |       | 3.77   | 0.53    | 2.69  | 0.00 |
| TRINITY_DN88335_c0_g1_i1  | TNF10 | 20.05  | 28.94   | -0.56 | 0.00 |
| TRINITY_DN88337_c1_g1_i1  | RAP1B | 0.39   | 1.25    | -5.53 | 0.00 |
| TRINITY_DN88337_c2_g1_i2  | PGAM1 | 12.11  | 5.53    | 1.11  | 0.00 |
| TRINITY_DN88337_c2_g1_i4  | PGAM1 | 0.00   | 2.68    | -6.49 | 0.00 |
| TRINITY_DN88431_c11_g2_i2 |       | 0.35   | 4.01    | -3.33 | 0.00 |
| TRINITY_DN88466_c7_g1_i2  |       | 7.29   | 3.87    | 0.87  | 0.00 |
| TRINITY_DN88482_c0_g1_i1  | CCD80 | 7.93   | 17.15   | -1.17 | 0.00 |

|                           |       |       |       |       |      |
|---------------------------|-------|-------|-------|-------|------|
| TRINITY_DN88554_c3_g1_i9  | PR15B | 1.56  | 5.89  | -1.94 | 0.00 |
| TRINITY_DN88602_c4_g4_i3  | BORG1 | 5.67  | 1.01  | 2.46  | 0.00 |
| TRINITY_DN88602_c4_g4_i6  | BORG1 | 0.13  | 2.79  | -4.71 | 0.00 |
| TRINITY_DN88675_c2_g1_i7  | AKIR2 | 3.27  | 0.02  | 6.45  | 0.00 |
| TRINITY_DN88684_c1_g1_i1  |       | 4.81  | 11.13 | -1.24 | 0.00 |
| TRINITY_DN88706_c0_g2_i4  | ODPX  | 2.32  | 0.00  | 6.74  | 0.00 |
| TRINITY_DN88712_c0_g1_i7  | TM127 | 4.14  | 7.65  | -0.91 | 0.00 |
| TRINITY_DN88764_c1_g2_i3  |       | 1.14  | 0.12  | 2.96  | 0.00 |
| TRINITY_DN88769_c4_g4_i2  |       | 0.63  | 13.73 | -4.27 | 0.00 |
| TRINITY_DN88816_c3_g3_i1  |       | 4.75  | 0.00  | 7.59  | 0.00 |
| TRINITY_DN88858_c3_g1_i2  | FLOT2 | 0.00  | 2.80  | -5.34 | 0.00 |
| TRINITY_DN88858_c3_g1_i4  | FLOT2 | 0.07  | 2.65  | -5.13 | 0.00 |
| TRINITY_DN88875_c4_g1_i4  | CCDB1 | 2.75  | 0.13  | 4.42  | 0.00 |
| TRINITY_DN88927_c2_g1_i3  | NDUAA | 18.77 | 9.57  | 0.95  | 0.00 |
| TRINITY_DN88952_c11_g2_i1 |       | 0.16  | 4.46  | -4.23 | 0.00 |
| TRINITY_DN89014_c1_g1_i2  | SEPT7 | 8.84  | 4.00  | 1.11  | 0.00 |
| TRINITY_DN89024_c0_g1_i4  | XBP1  | 7.32  | 11.15 | -0.65 | 0.00 |
| TRINITY_DN89066_c3_g1_i2  |       | 5.14  | 12.37 | -1.30 | 0.00 |
| TRINITY_DN89080_c6_g1_i7  | EXO1  | 0.76  | 0.02  | 4.36  | 0.00 |
| TRINITY_DN89143_c2_g1_i9  | CDC20 | 4.27  | 0.92  | 2.17  | 0.00 |
| TRINITY_DN89159_c7_g2_i1  |       | 0.37  | 4.10  | -3.78 | 0.00 |
| TRINITY_DN89175_c4_g1_i1  | FRRS1 | 3.82  | 9.98  | -1.42 | 0.00 |
| TRINITY_DN89233_c3_g1_i2  |       | 21.45 | 96.37 | -2.19 | 0.00 |
| TRINITY_DN89266_c1_g1_i4  | EMAL3 | 0.00  | 3.84  | -7.48 | 0.00 |
| TRINITY_DN89268_c1_g4_i1  | IER2  | 3.50  | 9.57  | -1.47 | 0.00 |
| TRINITY_DN89272_c4_g1_i8  | MIC19 | 1.59  | 0.02  | 5.15  | 0.00 |
| TRINITY_DN89276_c7_g1_i1  | GVIN1 | 0.00  | 6.86  | -7.79 | 0.00 |
| TRINITY_DN89395_c3_g1_i7  | IQGA1 | 6.01  | 0.81  | 2.86  | 0.00 |
| TRINITY_DN89430_c2_g1_i3  | DEPD7 | 1.26  | 0.11  | 3.51  | 0.00 |
| TRINITY_DN89435_c7_g1_i11 |       | 4.68  | 0.12  | 4.62  | 0.00 |
| TRINITY_DN89435_c7_g1_i2  |       | 0.00  | 3.96  | -5.37 | 0.00 |
| TRINITY_DN89449_c3_g2_i1  | INK1B | 4.33  | 7.69  | -0.85 | 0.00 |
| TRINITY_DN89464_c0_g1_i6  | CAN9  | 22.13 | 7.78  | 1.45  | 0.00 |
| TRINITY_DN89469_c2_g1_i1  | TNMD  | 14.58 | 58.34 | -2.03 | 0.00 |
| TRINITY_DN89506_c5_g2_i4  |       | 0.04  | 0.54  | -3.68 | 0.00 |
| TRINITY_DN89647_c7_g1_i2  |       | 0.00  | 9.33  | -7.68 | 0.00 |
| TRINITY_DN89665_c0_g2_i1  | SPDEF | 0.47  | 1.59  | -1.76 | 0.00 |
| TRINITY_DN89668_c0_g2_i1  |       | 0.54  | 2.51  | -2.23 | 0.00 |
| TRINITY_DN89712_c0_g2_i6  | DUS1  | 3.16  | 12.19 | -1.98 | 0.00 |
| TRINITY_DN89712_c0_g2_i8  |       | 3.52  | 12.85 | -1.87 | 0.00 |
| TRINITY_DN89720_c4_g1_i2  |       | 0.46  | 10.52 | -4.49 | 0.00 |
| TRINITY_DN89723_c4_g3_i1  |       | 5.50  | 11.60 | -1.11 | 0.00 |



|                           |       |       |        |       |      |
|---------------------------|-------|-------|--------|-------|------|
| TRINITY_DN89726_c6_g1_i4  | FCGBP | 8.24  | 2.20   | 1.91  | 0.00 |
| TRINITY_DN89733_c3_g1_i2  |       | 0.12  | 1.65   | -4.06 | 0.00 |
| TRINITY_DN89840_c3_g1_i6  |       | 0.00  | 0.50   | -5.10 | 0.00 |
| TRINITY_DN89883_c0_g1_i5  | K1C13 | 17.12 | 6.48   | 1.35  | 0.00 |
| TRINITY_DN89891_c1_g1_i3  | SAMD9 | 0.12  | 1.65   | -3.92 | 0.00 |
| TRINITY_DN89891_c1_g2_i1  | SAM9L | 0.15  | 1.51   | -3.33 | 0.00 |
| TRINITY_DN89896_c9_g1_i7  | EDF1  | 23.59 | 11.01  | 1.06  | 0.00 |
| TRINITY_DN89912_c9_g3_i6  | FER   | 0.00  | 0.95   | -6.01 | 0.00 |
| TRINITY_DN90007_c3_g2_i3  | K1C18 | 51.47 | 115.01 | -1.22 | 0.00 |
| TRINITY_DN90014_c2_g1_i1  | AVIL  | 3.75  | 8.30   | -1.18 | 0.00 |
| TRINITY_DN90014_c2_g1_i2  | AVIL  | 0.47  | 1.34   | -1.60 | 0.00 |
| TRINITY_DN90029_c0_g1_i1  | CNST  | 1.39  | 0.00   | 5.41  | 0.00 |
| TRINITY_DN90067_c2_g1_i7  | TSN11 | 0.10  | 1.48   | -3.98 | 0.00 |
| TRINITY_DN90094_c0_g1_i1  |       | 8.50  | 81.93  | -3.32 | 0.00 |
| TRINITY_DN90094_c0_g1_i2  |       | 1.90  | 24.07  | -3.74 | 0.00 |
| TRINITY_DN90094_c0_g1_i6  |       | 0.40  | 10.46  | -4.55 | 0.00 |
| TRINITY_DN90094_c0_g1_i8  |       | 9.27  | 59.52  | -2.71 | 0.00 |
| TRINITY_DN90094_c0_g1_i9  |       | 2.34  | 19.73  | -3.12 | 0.00 |
| TRINITY_DN90110_c1_g2_i2  | GILT  | 16.66 | 30.41  | -0.90 | 0.00 |
| TRINITY_DN9017_c0_g1_i1   | HGD   | 1.49  | 20.98  | -3.89 | 0.00 |
| TRINITY_DN90191_c5_g2_i1  | LOX5  | 0.31  | 2.02   | -2.80 | 0.00 |
| TRINITY_DN90251_c14_g1_i1 |       | 0.20  | 5.39   | -4.83 | 0.00 |
| TRINITY_DN90265_c2_g1_i1  | PLA2R | 0.20  | 2.34   | -3.39 | 0.00 |
| TRINITY_DN90265_c2_g1_i9  | PLA2R | 0.63  | 5.79   | -3.21 | 0.00 |
| TRINITY_DN90302_c2_g1_i3  | POF1B | 0.90  | 0.02   | 4.80  | 0.00 |
| TRINITY_DN90316_c2_g1_i3  |       | 5.67  | 14.20  | -1.35 | 0.00 |
| TRINITY_DN90321_c1_g2_i10 | RGS1  | 7.47  | 23.55  | -1.68 | 0.00 |
| TRINITY_DN90425_c6_g2_i1  |       | 0.51  | 2.25   | -2.16 | 0.00 |
| TRINITY_DN90436_c5_g1_i1  |       | 90.68 | 132.60 | -0.59 | 0.00 |
| TRINITY_DN90544_c6_g1_i1  |       | 2.15  | 15.84  | -2.94 | 0.00 |
| TRINITY_DN90544_c6_g2_i2  |       | 0.05  | 4.90   | -5.55 | 0.00 |
| TRINITY_DN90544_c6_g2_i3  |       | 2.24  | 19.33  | -3.14 | 0.00 |
| TRINITY_DN90635_c1_g3_i2  |       | 0.00  | 0.78   | -5.33 | 0.00 |
| TRINITY_DN90654_c0_g1_i1  | GFPT1 | 5.32  | 0.34   | 4.10  | 0.00 |
| TRINITY_DN90702_c5_g2_i1  | IL12B | 0.18  | 4.22   | -4.53 | 0.00 |
| TRINITY_DN90719_c0_g1_i1  | M1I1B | 65.32 | 177.03 | -1.48 | 0.00 |
| TRINITY_DN90746_c4_g1_i1  | RHBL4 | 0.04  | 1.12   | -4.47 | 0.00 |
| TRINITY_DN90770_c1_g1_i1  | RN146 | 0.00  | 1.15   | -6.00 | 0.00 |
| TRINITY_DN90779_c3_g2_i2  |       | 10.79 | 4.86   | 1.09  | 0.00 |
| TRINITY_DN90840_c0_g2_i1  |       | 0.02  | 0.62   | -4.22 | 0.00 |
| TRINITY_DN90915_c0_g5_i1  | NDC80 | 2.74  | 0.83   | 1.67  | 0.00 |
| TRINITY_DN90937_c2_g2_i2  | ANGL4 | 21.79 | 38.27  | -0.84 | 0.00 |

|                           |       |        |        |        |      |
|---------------------------|-------|--------|--------|--------|------|
| TRINITY_DN90955_c3_g6_i1  |       | 5.26   | 9.93   | -0.95  | 0.00 |
| TRINITY_DN90975_c6_g1_i5  | IFI44 | 0.18   | 3.21   | -4.66  | 0.00 |
| TRINITY_DN90991_c3_g1_i13 | MYO1C | 0.35   | 1.64   | -2.22  | 0.00 |
| TRINITY_DN90992_c0_g1_i9  | RIPK3 | 0.51   | 3.50   | -2.73  | 0.00 |
| TRINITY_DN90994_c0_g1_i5  | MDHC  | 9.33   | 4.96   | 0.88   | 0.00 |
| TRINITY_DN91000_c0_g1_i6  | LYAM1 | 0.69   | 10.88  | -3.88  | 0.00 |
| TRINITY_DN91003_c7_g1_i1  |       | 0.00   | 1.58   | -5.50  | 0.00 |
| TRINITY_DN91017_c9_g2_i1  | QCR2  | 5.98   | 3.31   | 0.81   | 0.00 |
| TRINITY_DN91036_c1_g1_i6  | TENS  | 0.93   | 3.77   | -2.01  | 0.00 |
| TRINITY_DN91132_c9_g1_i1  | MIC60 | 8.05   | 4.70   | 0.75   | 0.00 |
| TRINITY_DN91137_c2_g1_i1  | K1C18 | 0.00   | 10.50  | -23.47 | 0.00 |
| TRINITY_DN91140_c0_g1_i4  | NECP2 | 3.45   | 0.00   | 7.04   | 0.00 |
| TRINITY_DN91186_c9_g1_i6  |       | 2.98   | 0.23   | 3.41   | 0.00 |
| TRINITY_DN91223_c1_g1_i1  |       | 0.67   | 5.66   | -3.52  | 0.00 |
| TRINITY_DN91254_c0_g1_i1  | NACA  | 0.00   | 2.95   | -6.59  | 0.00 |
| TRINITY_DN91254_c0_g1_i5  | NACA  | 0.00   | 15.66  | -9.87  | 0.00 |
| TRINITY_DN91254_c0_g1_i7  | NACA  | 0.00   | 98.16  | -12.00 | 0.00 |
| TRINITY_DN91274_c6_g1_i1  |       | 0.04   | 1.38   | -4.75  | 0.00 |
| TRINITY_DN91324_c1_g1_i1  |       | 3.14   | 21.59  | -2.85  | 0.00 |
| TRINITY_DN91358_c0_g1_i2  |       | 470.89 | 163.31 | 1.49   | 0.00 |
| TRINITY_DN91362_c6_g5_i1  |       | 4.97   | 0.74   | 2.60   | 0.00 |
| TRINITY_DN91368_c4_g1_i5  |       | 0.00   | 4.19   | -5.72  | 0.00 |
| TRINITY_DN91372_c2_g1_i1  |       | 2.18   | 5.62   | -1.42  | 0.00 |
| TRINITY_DN91379_c3_g1_i1  |       | 2.41   | 13.12  | -2.46  | 0.00 |
| TRINITY_DN91379_c7_g1_i1  |       | 0.68   | 3.20   | -2.31  | 0.00 |
| TRINITY_DN91389_c2_g1_i2  | DOCK5 | 0.52   | 2.75   | -2.52  | 0.00 |
| TRINITY_DN91391_c2_g1_i2  | AEP1  | 0.18   | 1.42   | -2.99  | 0.00 |
| TRINITY_DN91391_c2_g2_i1  |       | 4.70   | 26.30  | -2.51  | 0.00 |
| TRINITY_DN91391_c2_g3_i1  |       | 2.36   | 8.42   | -1.89  | 0.00 |
| TRINITY_DN91393_c2_g1_i3  |       | 0.00   | 1.12   | -6.48  | 0.00 |
| TRINITY_DN91404_c0_g1_i8  | UBAC1 | 2.20   | 13.50  | -2.66  | 0.00 |
| TRINITY_DN91433_c7_g3_i3  | CTF8  | 2.15   | 0.52   | 1.91   | 0.00 |
| TRINITY_DN91439_c8_g2_i16 | ACTY  | 0.12   | 1.61   | -3.89  | 0.00 |
| TRINITY_DN91462_c5_g1_i13 |       | 2.69   | 33.97  | -3.70  | 0.00 |
| TRINITY_DN91462_c5_g1_i15 |       | 0.48   | 12.79  | -3.99  | 0.00 |
| TRINITY_DN91462_c5_g1_i5  |       | 0.34   | 15.49  | -4.58  | 0.00 |
| TRINITY_DN91462_c5_g1_i6  |       | 2.01   | 43.49  | -4.47  | 0.00 |
| TRINITY_DN91462_c5_g2_i2  |       | 0.85   | 24.82  | -5.02  | 0.00 |
| TRINITY_DN91462_c5_g2_i6  |       | 0.78   | 35.47  | -5.33  | 0.00 |
| TRINITY_DN91481_c4_g3_i1  |       | 3.60   | 8.67   | -1.29  | 0.00 |
| TRINITY_DN91481_c4_g3_i2  |       | 8.00   | 16.84  | -1.10  | 0.00 |
| TRINITY_DN91503_c5_g2_i2  |       | 4.22   | 0.79   | 2.38   | 0.00 |

|                           |       |       |       |       |      |
|---------------------------|-------|-------|-------|-------|------|
| TRINITY_DN91524_c4_g1_i5  | RTN3  | 17.73 | 9.03  | 0.92  | 0.00 |
| TRINITY_DN91528_c1_g1_i3  | GLT14 | 0.69  | 1.85  | -1.51 | 0.00 |
| TRINITY_DN91559_c1_g4_i1  | MAG   | 0.00  | 0.76  | -5.13 | 0.00 |
| TRINITY_DN91628_c0_g1_i4  | I20RA | 0.55  | 1.97  | -1.84 | 0.00 |
| TRINITY_DN91637_c5_g1_i1  |       | 2.19  | 0.02  | 6.95  | 0.00 |
| TRINITY_DN91680_c5_g2_i1  |       | 0.29  | 1.66  | -2.53 | 0.00 |
| TRINITY_DN91750_c3_g2_i4  | PDIA3 | 0.00  | 1.23  | -6.43 | 0.00 |
| TRINITY_DN91751_c0_g2_i2  | CAZA1 | 21.15 | 12.80 | 0.69  | 0.00 |
| TRINITY_DN91751_c0_g3_i2  | CAZA1 | 34.86 | 23.40 | 0.54  | 0.00 |
| TRINITY_DN91777_c0_g2_i2  | CATK  | 11.52 | 28.10 | -1.31 | 0.00 |
| TRINITY_DN91799_c0_g3_i2  |       | 39.28 | 63.20 | -0.72 | 0.00 |
| TRINITY_DN91816_c0_g4_i1  | MICA1 | 1.32  | 0.00  | 5.70  | 0.00 |
| TRINITY_DN91827_c0_g2_i3  |       | 0.23  | 1.82  | -3.01 | 0.00 |
| TRINITY_DN91838_c6_g2_i1  |       | 26.03 | 2.85  | 3.15  | 0.00 |
| TRINITY_DN91865_c2_g1_i11 | GPSM1 | 0.27  | 1.52  | -2.47 | 0.00 |
| TRINITY_DN91874_c7_g3_i1  |       | 0.39  | 3.03  | -3.04 | 0.00 |
| TRINITY_DN91889_c3_g1_i1  |       | 0.52  | 3.30  | -2.73 | 0.00 |
| TRINITY_DN91914_c1_g1_i2  | ARHG8 | 2.21  | 0.63  | 1.75  | 0.00 |
| TRINITY_DN91947_c2_g1_i2  | NFIL3 | 3.94  | 9.70  | -1.33 | 0.00 |
| TRINITY_DN92000_c1_g1_i4  | ACO11 | 0.00  | 1.32  | -6.43 | 0.00 |
| TRINITY_DN92053_c2_g1_i2  |       | 1.19  | 0.37  | 1.61  | 0.00 |
| TRINITY_DN92056_c10_g1_i6 | SVOP  | 9.02  | 22.54 | -1.36 | 0.00 |
| TRINITY_DN92061_c5_g1_i5  | ID2   | 46.55 | 70.80 | -0.64 | 0.00 |
| TRINITY_DN92073_c4_g3_i1  |       | 0.63  | 2.37  | -1.96 | 0.00 |
| TRINITY_DN92077_c1_g2_i9  |       | 4.06  | 0.42  | 3.27  | 0.00 |
| TRINITY_DN92095_c0_g1_i4  | KIF23 | 1.33  | 0.04  | 4.68  | 0.00 |
| TRINITY_DN92106_c1_g1_i1  | BFAR  | 0.09  | 1.56  | -3.98 | 0.00 |
| TRINITY_DN92178_c1_g1_i2  | DFP3  | 8.14  | 24.25 | -1.62 | 0.00 |
| TRINITY_DN92211_c0_g1_i5  | LIN7C | 4.59  | 8.33  | -0.90 | 0.00 |
| TRINITY_DN92211_c0_g7_i1  |       | 0.44  | 4.78  | -3.58 | 0.00 |
| TRINITY_DN92211_c0_g7_i2  |       | 3.35  | 0.12  | 4.15  | 0.00 |
| TRINITY_DN92225_c1_g1_i1  |       | 0.69  | 4.56  | -2.75 | 0.00 |
| TRINITY_DN92234_c1_g1_i6  | GPM6B | 0.00  | 3.57  | -6.87 | 0.00 |
| TRINITY_DN92248_c4_g1_i7  | IGSF3 | 0.49  | 2.82  | -2.55 | 0.00 |
| TRINITY_DN92275_c5_g1_i6  |       | 0.00  | 1.73  | -6.66 | 0.00 |
| TRINITY_DN92302_c2_g1_i1  |       | 22.92 | 72.32 | -1.72 | 0.00 |
| TRINITY_DN92356_c0_g1_i4  | GL8D1 | 0.00  | 1.67  | -6.62 | 0.00 |
| TRINITY_DN92395_c4_g2_i1  |       | 0.26  | 1.29  | -2.31 | 0.00 |
| TRINITY_DN92420_c1_g1_i1  | LADD  | 1.39  | 14.55 | -3.41 | 0.00 |
| TRINITY_DN92427_c5_g3_i2  | PLA2R | 0.47  | 2.46  | -2.45 | 0.00 |
| TRINITY_DN92428_c1_g2_i1  |       | 4.78  | 0.26  | 3.92  | 0.00 |
| TRINITY_DN92442_c2_g5_i1  |       | 9.01  | 1.42  | 2.59  | 0.00 |

|                           |       |        |        |       |      |
|---------------------------|-------|--------|--------|-------|------|
| TRINITY_DN92443_c6_g1_i2  | LTC4S | 0.40   | 2.78   | -2.79 | 0.00 |
| TRINITY_DN92474_c4_g1_i2  | PON2  | 3.70   | 7.43   | -1.04 | 0.00 |
| TRINITY_DN92481_c4_g1_i4  | PAR3  | 0.00   | 1.11   | -5.57 | 0.00 |
| TRINITY_DN92491_c0_g1_i1  | BZW1A | 2.60   | 6.47   | -1.36 | 0.00 |
| TRINITY_DN92506_c0_g1_i2  | UHRF1 | 4.20   | 2.00   | 1.02  | 0.00 |
| TRINITY_DN92539_c0_g1_i1  | SYWC  | 6.96   | 2.87   | 1.25  | 0.00 |
| TRINITY_DN92588_c0_g3_i1  | PACS1 | 0.01   | 0.84   | -4.90 | 0.00 |
| TRINITY_DN92599_c1_g2_i2  | JUNB  | 9.69   | 20.07  | -1.10 | 0.00 |
| TRINITY_DN92626_c2_g4_i1  | UBE2K | 0.00   | 1.56   | -5.45 | 0.00 |
| TRINITY_DN92638_c0_g1_i2  | NUB1  | 0.66   | 5.20   | -3.03 | 0.00 |
| TRINITY_DN92643_c1_g1_i3  | BSDC1 | 0.08   | 4.65   | -5.80 | 0.00 |
| TRINITY_DN92679_c4_g1_i10 | STS   | 0.07   | 1.33   | -4.45 | 0.00 |
| TRINITY_DN92698_c6_g2_i6  | MEL2A | 1.38   | 0.21   | 2.88  | 0.00 |
| TRINITY_DN92710_c0_g2_i2  | MUC5B | 0.04   | 2.34   | -5.65 | 0.00 |
| TRINITY_DN92710_c1_g3_i1  |       | 0.00   | 7.53   | -7.00 | 0.00 |
| TRINITY_DN92710_c1_g3_i12 |       | 1.62   | 27.79  | -4.08 | 0.00 |
| TRINITY_DN92710_c1_g3_i13 |       | 0.40   | 11.15  | -4.78 | 0.00 |
| TRINITY_DN92710_c1_g3_i15 | MUC5B | 0.21   | 7.66   | -5.30 | 0.00 |
| TRINITY_DN92710_c1_g3_i19 |       | 0.43   | 11.57  | -4.56 | 0.00 |
| TRINITY_DN92710_c1_g3_i20 | MUC5B | 0.50   | 6.67   | -3.78 | 0.00 |
| TRINITY_DN92710_c1_g3_i7  | MUC5A | 0.05   | 2.73   | -4.69 | 0.00 |
| TRINITY_DN92710_c1_g3_i9  |       | 0.64   | 32.27  | -5.71 | 0.00 |
| TRINITY_DN92766_c0_g1_i4  | MSLNL | 1.65   | 0.42   | 1.97  | 0.00 |
| TRINITY_DN92769_c8_g2_i10 | AGRG4 | 0.00   | 1.59   | -6.88 | 0.00 |
| TRINITY_DN92779_c5_g1_i4  | PKHG3 | 0.79   | 0.00   | 5.96  | 0.00 |
| TRINITY_DN92781_c1_g5_i1  | TMED2 | 0.00   | 5.45   | -7.79 | 0.00 |
| TRINITY_DN92793_c9_g1_i2  |       | 7.51   | 2.16   | 1.74  | 0.00 |
| TRINITY_DN92825_c5_g1_i3  | RC3H1 | 0.02   | 0.35   | -3.78 | 0.00 |
| TRINITY_DN92832_c0_g1_i11 |       | 18.59  | 0.80   | 4.24  | 0.00 |
| TRINITY_DN92832_c0_g1_i2  |       | 29.31  | 3.32   | 3.08  | 0.00 |
| TRINITY_DN92832_c0_g1_i3  |       | 124.87 | 16.86  | 2.84  | 0.00 |
| TRINITY_DN92832_c0_g1_i4  |       | 14.12  | 0.92   | 3.82  | 0.00 |
| TRINITY_DN92832_c0_g1_i5  |       | 4.38   | 0.24   | 4.20  | 0.00 |
| TRINITY_DN92832_c0_g1_i6  |       | 14.27  | 1.37   | 3.31  | 0.00 |
| TRINITY_DN92832_c0_g1_i8  |       | 31.35  | 2.92   | 3.36  | 0.00 |
| TRINITY_DN92833_c2_g2_i6  | PTMAA | 139.74 | 234.26 | -0.77 | 0.00 |
| TRINITY_DN92839_c0_g2_i1  | DUS6  | 0.00   | 1.35   | -6.35 | 0.00 |
| TRINITY_DN92839_c0_g2_i2  | DUS6  | 10.72  | 19.80  | -0.91 | 0.00 |
| TRINITY_DN92901_c1_g1_i3  | HMCN2 | 0.01   | 0.63   | -5.73 | 0.00 |
| TRINITY_DN92921_c1_g2_i2  | OLM2B | 2.24   | 0.00   | 7.35  | 0.00 |
| TRINITY_DN92967_c4_g2_i3  | LIPO  | 9.54   | 78.05  | -3.05 | 0.00 |
| TRINITY_DN93085_c5_g1_i1  |       | 16.46  | 7.80   | 1.01  | 0.00 |

|                           |       |       |        |       |      |
|---------------------------|-------|-------|--------|-------|------|
| TRINITY_DN93110_c0_g1_i1  | STX5  | 1.48  | 0.03   | 5.23  | 0.00 |
| TRINITY_DN93125_c1_g1_i6  | LYPA2 | 10.55 | 6.36   | 0.68  | 0.00 |
| TRINITY_DN93143_c8_g1_i4  |       | 0.22  | 3.77   | -4.20 | 0.00 |
| TRINITY_DN93172_c3_g1_i4  | AQP3  | 35.75 | 36.03  | 23.19 | 0.00 |
| TRINITY_DN93239_c1_g1_i13 | AGRP  | 0.11  | 2.51   | -4.54 | 0.00 |
| TRINITY_DN93267_c3_g1_i1  | TES   | 4.47  | 0.00   | 7.39  | 0.00 |
| TRINITY_DN93289_c5_g3_i1  | SLAP2 | 0.13  | 0.95   | -2.85 | 0.00 |
| TRINITY_DN93321_c2_g1_i8  |       | 0.00  | 0.60   | -4.78 | 0.00 |
| TRINITY_DN93384_c2_g2_i10 |       | 18.86 | 5.12   | 1.83  | 0.00 |
| TRINITY_DN93417_c7_g3_i4  |       | 28.04 | 4.47   | 2.86  | 0.00 |
| TRINITY_DN93433_c3_g1_i1  |       | 0.16  | 1.30   | -2.89 | 0.00 |
| TRINITY_DN93447_c5_g3_i2  |       | 3.30  | 0.49   | 4.32  | 0.00 |
| TRINITY_DN93447_c5_g3_i4  |       | 0.18  | 5.64   | -4.97 | 0.00 |
| TRINITY_DN93468_c0_g1_i4  | RL4B  | 0.00  | 7.92   | -7.98 | 0.00 |
| TRINITY_DN93468_c0_g1_i9  | RL4B  | 28.35 | 50.30  | -0.86 | 0.00 |
| TRINITY_DN93500_c8_g3_i2  | NHS   | 0.00  | 1.13   | -4.95 | 0.00 |
| TRINITY_DN93572_c2_g1_i1  |       | 0.17  | 2.27   | -3.58 | 0.00 |
| TRINITY_DN93616_c4_g2_i2  |       | 5.37  | 0.37   | 3.62  | 0.00 |
| TRINITY_DN93632_c0_g1_i5  | CNTN1 | 47.58 | 87.01  | -0.89 | 0.00 |
| TRINITY_DN93644_c2_g1_i9  | YIF1A | 1.72  | 0.50   | 1.81  | 0.00 |
| TRINITY_DN93668_c3_g1_i4  |       | 18.96 | 3.18   | 2.56  | 0.00 |
| TRINITY_DN93669_c0_g1_i13 | AKA12 | 0.00  | 2.53   | -8.93 | 0.00 |
| TRINITY_DN93669_c0_g1_i5  | AKA12 | 0.75  | 0.00   | 6.10  | 0.00 |
| TRINITY_DN93669_c0_g1_i6  | AKA12 | 0.00  | 1.33   | -7.48 | 0.00 |
| TRINITY_DN93678_c6_g1_i9  | MBTP2 | 0.61  | 0.01   | 4.77  | 0.00 |
| TRINITY_DN93690_c6_g2_i1  |       | 0.26  | 1.69   | -2.73 | 0.00 |
| TRINITY_DN93774_c5_g1_i16 | PHLB1 | 0.00  | 0.88   | -6.02 | 0.00 |
| TRINITY_DN93775_c0_g2_i14 |       | 8.04  | 25.12  | -1.68 | 0.00 |
| TRINITY_DN93814_c1_g3_i3  |       | 0.57  | 9.23   | -4.06 | 0.00 |
| TRINITY_DN93822_c0_g1_i1  | KLF4  | 41.62 | 110.19 | -1.44 | 0.00 |
| TRINITY_DN93822_c0_g1_i5  | KLF2  | 11.50 | 35.34  | -1.65 | 0.00 |
| TRINITY_DN93851_c7_g1_i7  |       | 0.00  | 1.31   | -5.82 | 0.00 |
| TRINITY_DN93854_c1_g2_i1  |       | 0.17  | 11.56  | -5.13 | 0.00 |
| TRINITY_DN93860_c1_g4_i6  | VGFR2 | 0.02  | 1.49   | -6.02 | 0.00 |
| TRINITY_DN93865_c7_g1_i2  | ADAP1 | 0.25  | 1.82   | -2.98 | 0.00 |
| TRINITY_DN93880_c1_g1_i4  | ARF4  | 5.97  | 0.00   | 7.37  | 0.00 |
| TRINITY_DN93882_c1_g2_i2  | K1C18 | 1.41  | 6.34   | -2.19 | 0.00 |
| TRINITY_DN93887_c1_g1_i6  | TFPI2 | 0.92  | 7.51   | -3.08 | 0.00 |
| TRINITY_DN93894_c0_g3_i1  | CCL20 | 8.39  | 30.53  | -1.90 | 0.00 |
| TRINITY_DN93905_c0_g2_i1  |       | 0.03  | 4.45   | -5.77 | 0.00 |
| TRINITY_DN93944_c6_g1_i1  | GYS1  | 3.73  | 1.17   | 1.68  | 0.00 |
| TRINITY_DN93961_c0_g2_i4  | BTG2  | 17.44 | 36.46  | -1.11 | 0.00 |

|                          |       |        |        |        |      |
|--------------------------|-------|--------|--------|--------|------|
| TRINITY_DN93971_c3_g1_i1 | SMAD4 | 0.00   | 4.01   | -5.06  | 0.00 |
| TRINITY_DN93973_c5_g1_i4 |       | 0.12   | 2.18   | -4.17  | 0.00 |
| TRINITY_DN93973_c5_g2_i1 |       | 2.11   | 7.57   | -1.90  | 0.00 |
| TRINITY_DN93990_c2_g1_i2 | EGR1  | 9.83   | 38.47  | -2.03  | 0.00 |
| TRINITY_DN93990_c2_g1_i4 | EGR1  | 2.39   | 14.39  | -2.62  | 0.00 |
| TRINITY_DN93990_c2_g3_i1 | EGR1  | 9.14   | 30.18  | -1.78  | 0.00 |
| TRINITY_DN94018_c2_g1_i6 | ARMT1 | 0.00   | 0.96   | -6.03  | 0.00 |
| TRINITY_DN94065_c0_g2_i4 | PHB   | 12.84  | 7.24   | 0.81   | 0.00 |
| TRINITY_DN94075_c3_g1_i1 | TOP2A | 6.82   | 2.70   | 1.28   | 0.00 |
| TRINITY_DN94122_c1_g1_i4 |       | 0.00   | 2.01   | -4.72  | 0.00 |
| TRINITY_DN94194_c4_g1_i4 | OSTC  | 37.83  | 23.82  | 0.63   | 0.00 |
| TRINITY_DN94201_c0_g2_i1 |       | 0.00   | 25.94  | -5.86  | 0.00 |
| TRINITY_DN94202_c1_g2_i1 | PPID  | 13.55  | 6.54   | 1.00   | 0.00 |
| TRINITY_DN94223_c5_g1_i3 |       | 0.00   | 10.08  | -7.85  | 0.00 |
| TRINITY_DN94223_c5_g3_i1 |       | 246.75 | 69.21  | 1.76   | 0.00 |
| TRINITY_DN94230_c1_g1_i1 |       | 108.34 | 72.09  | 0.54   | 0.00 |
| TRINITY_DN94234_c2_g5_i1 | IRF1  | 27.85  | 69.77  | -1.34  | 0.00 |
| TRINITY_DN94273_c0_g3_i5 | PGK   | 25.96  | 10.79  | 1.32   | 0.00 |
| TRINITY_DN94324_c7_g2_i6 | AGRG3 | 0.26   | 2.67   | -3.36  | 0.00 |
| TRINITY_DN94340_c0_g3_i1 | RSPRY | 3.01   | 0.07   | 5.43   | 0.00 |
| TRINITY_DN94344_c3_g3_i1 | FGL2  | 18.02  | 39.00  | -1.14  | 0.00 |
| TRINITY_DN94351_c1_g4_i1 |       | 2.47   | 27.62  | -3.45  | 0.00 |
| TRINITY_DN94351_c3_g3_i1 |       | 0.00   | 4.69   | -22.16 | 0.00 |
| TRINITY_DN94396_c0_g1_i3 | PCKGC | 0.00   | 0.79   | -5.67  | 0.00 |
| TRINITY_DN94450_c2_g2_i5 | IFI44 | 1.79   | 9.90   | -2.47  | 0.00 |
| TRINITY_DN94456_c9_g1_i1 | MRC2  | 1.12   | 7.24   | -2.74  | 0.00 |
| TRINITY_DN94516_c5_g3_i6 | DERM  | 2.43   | 0.30   | 2.90   | 0.00 |
| TRINITY_DN94529_c6_g3_i2 |       | 0.10   | 17.40  | -5.41  | 0.00 |
| TRINITY_DN94536_c0_g5_i4 | JUNB  | 64.91  | 147.85 | -1.25  | 0.00 |
| TRINITY_DN94541_c2_g1_i4 |       | 887.08 | 362.46 | 1.24   | 0.00 |
| TRINITY_DN94558_c1_g1_i8 | NFIL3 | 0.02   | 0.55   | -4.40  | 0.00 |
| TRINITY_DN94563_c1_g3_i1 | BARD1 | 0.72   | 0.23   | 1.64   | 0.00 |
| TRINITY_DN94568_c0_g1_i4 | BHE40 | 21.71  | 37.16  | -0.82  | 0.00 |
| TRINITY_DN94602_c3_g1_i7 |       | 4.25   | 15.87  | -1.93  | 0.00 |
| TRINITY_DN94611_c6_g1_i1 |       | 1.10   | 5.44   | -2.35  | 0.00 |
| TRINITY_DN94628_c4_g2_i1 |       | 0.95   | 5.05   | -2.47  | 0.00 |
| TRINITY_DN94629_c9_g5_i1 |       | 0.55   | 4.44   | -2.91  | 0.00 |
| TRINITY_DN94661_c0_g2_i5 |       | 0.24   | 19.36  | -5.35  | 0.00 |
| TRINITY_DN94675_c0_g1_i4 | IMA1  | 7.46   | 2.63   | 1.45   | 0.00 |
| TRINITY_DN94679_c3_g1_i1 |       | 0.11   | 58.90  | -7.78  | 0.00 |
| TRINITY_DN94679_c3_g2_i2 |       | 0.04   | 4.81   | -6.08  | 0.00 |
| TRINITY_DN94698_c2_g2_i1 |       | 4.60   | 7.65   | -0.76  | 0.00 |

|                           |       |        |        |       |      |
|---------------------------|-------|--------|--------|-------|------|
| TRINITY_DN94726_c3_g1_i1  |       | 112.60 | 15.71  | 2.92  | 0.00 |
| TRINITY_DN94726_c9_g1_i6  | PRS27 | 4.80   | 0.15   | 5.12  | 0.00 |
| TRINITY_DN94726_c9_g1_i9  | PRS27 | 64.56  | 4.16   | 4.04  | 0.00 |
| TRINITY_DN94744_c0_g1_i5  | ITM2B | 93.70  | 138.52 | -0.61 | 0.00 |
| TRINITY_DN94744_c0_g5_i5  | ITM2B | 43.36  | 59.47  | -0.48 | 0.00 |
| TRINITY_DN94783_c2_g2_i2  |       | 2.86   | 1.50   | 0.89  | 0.00 |
| TRINITY_DN94788_c0_g2_i4  | RNF13 | 3.39   | 0.00   | 7.46  | 0.00 |
| TRINITY_DN94802_c4_g2_i4  |       | 2.37   | 21.56  | -3.21 | 0.00 |
| TRINITY_DN94840_c0_g2_i3  | RSPRY | 1.23   | 0.00   | 5.32  | 0.00 |
| TRINITY_DN94883_c4_g4_i2  | K1C13 | 3.00   | 19.88  | -2.69 | 0.00 |
| TRINITY_DN94891_c5_g4_i1  | ZN706 | 108.17 | 73.08  | 0.52  | 0.00 |
| TRINITY_DN94919_c1_g2_i15 | F122A | 1.17   | 0.07   | 4.33  | 0.00 |
| TRINITY_DN94925_c5_g1_i1  |       | 0.49   | 5.55   | -3.29 | 0.00 |
| TRINITY_DN94957_c3_g7_i1  |       | 59.06  | 89.54  | -0.65 | 0.00 |
| TRINITY_DN94966_c1_g1_i2  | TISB  | 26.25  | 59.10  | -1.21 | 0.00 |
| TRINITY_DN94966_c1_g1_i4  | TISB  | 33.65  | 67.95  | -1.06 | 0.00 |
| TRINITY_DN94966_c1_g1_i5  | TISB  | 36.13  | 73.26  | -1.08 | 0.00 |
| TRINITY_DN94966_c1_g1_i7  | TISB  | 22.88  | 48.71  | -1.14 | 0.00 |
| TRINITY_DN94979_c2_g4_i1  | M1I1B | 20.99  | 49.31  | -1.28 | 0.00 |
| TRINITY_DN94979_c2_g4_i2  | M1I1B | 18.55  | 44.27  | -1.29 | 0.00 |
| TRINITY_DN94991_c2_g1_i5  |       | 0.00   | 1.89   | -6.69 | 0.00 |
| TRINITY_DN94992_c2_g1_i4  |       | 6.52   | 0.52   | 3.59  | 0.00 |
| TRINITY_DN95055_c5_g8_i1  |       | 17.47  | 0.67   | 4.10  | 0.00 |
| TRINITY_DN95109_c5_g1_i2  | B2MG  | 70.77  | 121.35 | -0.80 | 0.00 |
| TRINITY_DN95127_c1_g1_i6  |       | 0.15   | 1.67   | -3.76 | 0.00 |
| TRINITY_DN95129_c0_g1_i1  | RHGBA | 1.64   | 0.66   | 1.24  | 0.00 |
| TRINITY_DN95146_c0_g1_i19 | UAP1  | 1.08   | 0.05   | 4.26  | 0.00 |
| TRINITY_DN95177_c1_g1_i7  | IGM   | 0.05   | 2.92   | -6.27 | 0.00 |
| TRINITY_DN95218_c0_g3_i11 | TP53B | 0.87   | 0.00   | 5.53  | 0.00 |
| TRINITY_DN95220_c3_g1_i1  | ENOF1 | 1.02   | 6.21   | -2.65 | 0.00 |
| TRINITY_DN95238_c0_g1_i4  | MUC2  | 1.53   | 60.55  | -5.35 | 0.00 |
| TRINITY_DN95253_c3_g3_i1  | LDB1  | 0.12   | 8.46   | -4.58 | 0.00 |
| TRINITY_DN95255_c1_g1_i3  | CIRBB | 10.66  | 2.50   | 2.02  | 0.00 |
| TRINITY_DN95256_c2_g1_i11 | AGRG7 | 0.15   | 2.01   | -3.85 | 0.00 |
| TRINITY_DN95261_c2_g1_i3  |       | 4.78   | 0.00   | 7.47  | 0.00 |
| TRINITY_DN95263_c4_g1_i6  | SKAP2 | 0.34   | 2.05   | -2.52 | 0.00 |
| TRINITY_DN95265_c1_g1_i4  | TPL2B | 0.00   | 6.00   | -8.10 | 0.00 |
| TRINITY_DN95309_c8_g1_i1  |       | 145.66 | 39.94  | 1.82  | 0.00 |
| TRINITY_DN95309_c8_g1_i5  |       | 2.69   | 0.23   | 3.58  | 0.00 |
| TRINITY_DN95309_c8_g1_i8  |       | 85.82  | 23.44  | 1.85  | 0.00 |
| TRINITY_DN95309_c8_g1_i9  |       | 24.08  | 8.39   | 1.46  | 0.00 |
| TRINITY_DN95313_c0_g1_i6  | COG8  | 1.44   | 0.04   | 5.00  | 0.00 |

|                           |       |       |       |       |      |
|---------------------------|-------|-------|-------|-------|------|
| TRINITY_DN95328_c1_g1_i4  | PRC1  | 0.00  | 1.02  | -5.99 | 0.00 |
| TRINITY_DN95357_c1_g2_i3  | AT1A2 | 12.82 | 0.95  | 3.46  | 0.00 |
| TRINITY_DN95376_c2_g1_i1  |       | 0.00  | 2.50  | -6.06 | 0.00 |
| TRINITY_DN95430_c0_g1_i3  | KIN17 | 1.89  | 0.10  | 3.92  | 0.00 |
| TRINITY_DN95454_c0_g2_i9  |       | 0.69  | 12.70 | -4.19 | 0.00 |
| TRINITY_DN95468_c0_g1_i3  | PLK2  | 8.07  | 14.63 | -0.90 | 0.00 |
| TRINITY_DN95488_c1_g1_i2  |       | 0.00  | 6.15  | -6.42 | 0.00 |
| TRINITY_DN95515_c0_g1_i13 | RSSA  | 0.42  | 7.85  | -4.13 | 0.00 |
| TRINITY_DN95519_c3_g1_i3  | ASNA  | 0.00  | 1.55  | -6.06 | 0.00 |
| TRINITY_DN95539_c4_g2_i1  | CCR6  | 0.42  | 2.45  | -2.67 | 0.00 |
| TRINITY_DN95545_c0_g1_i1  |       | 0.00  | 10.96 | -6.76 | 0.00 |
| TRINITY_DN95545_c0_g1_i2  |       | 0.22  | 11.10 | -5.85 | 0.00 |
| TRINITY_DN95572_c12_g1_i1 |       | 1.07  | 3.05  | -1.57 | 0.00 |
| TRINITY_DN95610_c1_g1_i2  | PTBP2 | 7.43  | 0.32  | 4.31  | 0.00 |
| TRINITY_DN95632_c8_g1_i4  |       | 0.06  | 3.79  | -4.55 | 0.00 |
| TRINITY_DN95634_c1_g1_i8  | RPN1  | 16.54 | 9.98  | 0.68  | 0.00 |
| TRINITY_DN95635_c0_g4_i3  | ZN106 | 0.46  | 0.00  | 5.42  | 0.00 |
| TRINITY_DN95672_c1_g2_i14 | HGS   | 1.79  | 0.04  | 5.28  | 0.00 |
| TRINITY_DN95677_c0_g1_i1  |       | 8.13  | 11.90 | -0.60 | 0.00 |
| TRINITY_DN95699_c0_g1_i5  | SYCC  | 2.40  | 0.05  | 5.29  | 0.00 |
| TRINITY_DN95724_c14_g1_i2 |       | 2.13  | 0.00  | 5.33  | 0.00 |
| TRINITY_DN95731_c3_g1_i5  |       | 0.00  | 2.06  | -7.83 | 0.00 |
| TRINITY_DN95741_c1_g1_i22 | NUCL  | 8.38  | 0.00  | 8.54  | 0.00 |
| TRINITY_DN95784_c1_g1_i2  | EGR1  | 14.95 | 48.90 | -1.78 | 0.00 |
| TRINITY_DN95784_c2_g1_i1  |       | 2.86  | 12.58 | -2.17 | 0.00 |
| TRINITY_DN95784_c2_g2_i1  |       | 17.20 | 61.67 | -1.91 | 0.00 |
| TRINITY_DN95856_c1_g1_i19 | PFKAP | 1.04  | 0.00  | 4.98  | 0.00 |
| TRINITY_DN95869_c1_g1_i2  | ARRD2 | 6.88  | 13.62 | -1.02 | 0.00 |
| TRINITY_DN95886_c5_g1_i1  |       | 3.63  | 10.58 | -1.54 | 0.00 |
| TRINITY_DN95891_c1_g1_i1  | PAXI  | 0.89  | 0.00  | 4.70  | 0.00 |
| TRINITY_DN95924_c5_g1_i3  | PLDX1 | 0.91  | 0.00  | 4.46  | 0.00 |
| TRINITY_DN95934_c0_g1_i1  | IL1B  | 1.91  | 6.22  | -1.75 | 0.00 |
| TRINITY_DN95934_c0_g1_i2  | IL1B  | 4.85  | 18.48 | -1.98 | 0.00 |
| TRINITY_DN95961_c0_g2_i1  | CR3L3 | 0.00  | 16.94 | -6.31 | 0.00 |
| TRINITY_DN95976_c3_g5_i1  |       | 0.41  | 3.51  | -3.12 | 0.00 |
| TRINITY_DN95988_c1_g3_i1  |       | 0.40  | 13.04 | -4.91 | 0.00 |
| TRINITY_DN95989_c0_g1_i14 |       | 14.49 | 2.55  | 2.51  | 0.00 |
| TRINITY_DN95993_c1_g1_i16 | KI20A | 0.73  | 0.00  | 5.71  | 0.00 |
| TRINITY_DN95993_c1_g2_i4  | MCM7  | 13.46 | 6.80  | 0.93  | 0.00 |
| TRINITY_DN95996_c3_g2_i2  | PTX3  | 0.59  | 9.52  | -4.15 | 0.00 |
| TRINITY_DN96003_c0_g1_i5  | EPN3  | 0.80  | 0.00  | 5.64  | 0.00 |
| TRINITY_DN96005_c1_g2_i7  | SC31A | 2.78  | 1.16  | 1.21  | 0.00 |



|                           |       |        |        |       |      |
|---------------------------|-------|--------|--------|-------|------|
| TRINITY_DN96013_c5_g1_i1  |       | 3.20   | 0.08   | 4.98  | 0.00 |
| TRINITY_DN96022_c0_g1_i1  | CEBPA | 15.80  | 26.94  | -0.80 | 0.00 |
| TRINITY_DN96077_c4_g1_i10 | ICOSL | 4.33   | 0.01   | 8.00  | 0.00 |
| TRINITY_DN96077_c4_g1_i4  | ICOSL | 0.87   | 0.01   | 5.87  | 0.00 |
| TRINITY_DN96128_c2_g4_i6  | ZDHC2 | 0.04   | 1.05   | -4.87 | 0.00 |
| TRINITY_DN96191_c0_g1_i2  | TOB1  | 20.79  | 40.37  | -1.00 | 0.00 |
| TRINITY_DN96204_c3_g1_i3  |       | 0.00   | 1.36   | -6.03 | 0.00 |
| TRINITY_DN96225_c9_g2_i4  |       | 0.10   | 3.20   | -4.57 | 0.00 |
| TRINITY_DN96228_c3_g1_i4  | SC5A3 | 0.55   | 0.00   | 5.39  | 0.00 |
| TRINITY_DN96255_c5_g1_i5  | ACTS  | 38.33  | 137.23 | -1.89 | 0.00 |
| TRINITY_DN96327_c0_g3_i1  | MCM5  | 7.29   | 2.94   | 1.25  | 0.00 |
| TRINITY_DN96364_c2_g1_i1  |       | 0.21   | 1.50   | -2.86 | 0.00 |
| TRINITY_DN96413_c1_g6_i2  |       | 12.62  | 19.82  | -0.69 | 0.00 |
| TRINITY_DN96449_c3_g1_i3  | RFLA  | 1.02   | 0.00   | 6.26  | 0.00 |
| TRINITY_DN96457_c8_g2_i19 |       | 1.59   | 0.00   | 6.14  | 0.00 |
| TRINITY_DN96477_c1_g1_i4  | TOM70 | 9.06   | 4.45   | 0.97  | 0.00 |
| TRINITY_DN96485_c6_g1_i1  |       | 9.75   | 1.94   | 2.24  | 0.00 |
| TRINITY_DN96534_c2_g1_i2  |       | 2.38   | 8.03   | -1.78 | 0.00 |
| TRINITY_DN96636_c0_g3_i1  |       | 11.41  | 27.49  | -1.31 | 0.00 |
| TRINITY_DN96670_c5_g3_i7  | STA13 | 0.00   | 0.99   | -6.83 | 0.00 |
| TRINITY_DN96679_c4_g1_i1  |       | 2.50   | 0.65   | 1.87  | 0.00 |
| TRINITY_DN96736_c0_g3_i1  | FUCL4 | 1.90   | 9.98   | -2.41 | 0.00 |
| TRINITY_DN96737_c1_g1_i8  | APOEB | 517.37 | 787.03 | -0.64 | 0.00 |
| TRINITY_DN96747_c10_g3_i1 | SHSA4 | 0.00   | 3.61   | -6.58 | 0.00 |
| TRINITY_DN96755_c6_g1_i2  | GIT2  | 0.08   | 0.78   | -3.37 | 0.00 |
| TRINITY_DN96758_c4_g1_i5  | GT2D2 | 1.68   | 0.00   | 6.80  | 0.00 |
| TRINITY_DN96779_c2_g3_i2  | ANX2A | 0.00   | 12.98  | -8.58 | 0.00 |
| TRINITY_DN96820_c2_g1_i4  | K0907 | 2.19   | 0.12   | 4.16  | 0.00 |
| TRINITY_DN96847_c10_g3_i1 | MAFK  | 4.85   | 10.04  | -1.07 | 0.00 |
| TRINITY_DN96867_c2_g3_i2  |       | 1.53   | 0.16   | 3.11  | 0.00 |
| TRINITY_DN96868_c0_g1_i1  | GRP75 | 12.08  | 6.51   | 0.85  | 0.00 |
| TRINITY_DN96881_c1_g1_i1  | ARPC2 | 40.58  | 21.34  | 0.89  | 0.00 |
| TRINITY_DN96894_c5_g3_i2  |       | 0.05   | 2.01   | -5.17 | 0.00 |
| TRINITY_DN96908_c1_g2_i1  | METK1 | 8.50   | 4.74   | 0.81  | 0.00 |
| TRINITY_DN96926_c1_g1_i8  | DDX18 | 0.10   | 3.43   | -5.19 | 0.00 |
| TRINITY_DN96950_c5_g1_i1  |       | 0.52   | 5.21   | -3.34 | 0.00 |
| TRINITY_DN96984_c0_g1_i5  | T106B | 0.78   | 0.69   | -5.65 | 0.00 |
| TRINITY_DN97018_c3_g1_i4  | HNRPK | 2.62   | 0.30   | 3.56  | 0.00 |
| TRINITY_DN97019_c10_g3_i1 |       | 0.81   | 2.92   | -1.96 | 0.00 |
| TRINITY_DN97036_c0_g1_i4  | CD68  | 0.00   | 12.74  | -9.06 | 0.00 |
| TRINITY_DN97036_c0_g1_i6  | CD68  | 0.16   | 6.78   | -5.37 | 0.00 |
| TRINITY_DN97087_c3_g2_i2  | KLH24 | 0.00   | 0.90   | -6.04 | 0.00 |

|                           |       |       |        |       |      |
|---------------------------|-------|-------|--------|-------|------|
| TRINITY_DN97133_c2_g1_i1  |       | 2.34  | 0.78   | 1.49  | 0.00 |
| TRINITY_DN97143_c3_g1_i5  | PCAT1 | 0.51  | 0.02   | 3.65  | 0.00 |
| TRINITY_DN97143_c3_g1_i8  | PCAT1 | 2.28  | 0.29   | 3.09  | 0.00 |
| TRINITY_DN97143_c3_g3_i1  |       | 0.59  | 5.03   | -3.17 | 0.00 |
| TRINITY_DN97145_c5_g1_i2  | APOD  | 22.98 | 0.93   | 4.81  | 0.00 |
| TRINITY_DN97186_c1_g1_i13 | PIM1  | 13.48 | 33.42  | -1.37 | 0.00 |
| TRINITY_DN97186_c1_g1_i7  | PIM1  | 16.77 | 42.07  | -1.38 | 0.00 |
| TRINITY_DN97187_c0_g1_i10 | KCTD3 | 0.00  | 0.88   | -7.11 | 0.00 |
| TRINITY_DN97191_c0_g1_i6  | TSP1  | 0.11  | 1.28   | -3.51 | 0.00 |
| TRINITY_DN97207_c1_g1_i4  | A33   | 0.00  | 0.66   | -5.03 | 0.00 |
| TRINITY_DN97230_c8_g1_i1  |       | 0.23  | 3.13   | -3.65 | 0.00 |
| TRINITY_DN97240_c4_g1_i9  | CATC  | 15.70 | 8.94   | 0.77  | 0.00 |
| TRINITY_DN97261_c0_g2_i1  | FUBP1 | 30.72 | 10.38  | 1.51  | 0.00 |
| TRINITY_DN97292_c0_g1_i10 | ATF3  | 4.18  | 19.68  | -2.22 | 0.00 |
| TRINITY_DN97292_c0_g3_i1  | ATF3  | 3.13  | 17.07  | -2.45 | 0.00 |
| TRINITY_DN97339_c1_g1_i6  | MTRR  | 1.08  | 0.00   | 5.62  | 0.00 |
| TRINITY_DN97347_c3_g1_i1  |       | 0.03  | 0.92   | -4.70 | 0.00 |
| TRINITY_DN97392_c4_g5_i1  |       | 0.00  | 7.72   | -6.59 | 0.00 |
| TRINITY_DN97455_c5_g1_i1  |       | 19.41 | 4.10   | 2.14  | 0.00 |
| TRINITY_DN97491_c1_g1_i8  | KDM1A | 0.17  | 3.38   | -4.44 | 0.00 |
| TRINITY_DN97531_c1_g1_i12 | FOSB  | 0.19  | 3.11   | -4.07 | 0.00 |
| TRINITY_DN97541_c2_g1_i2  |       | 46.88 | 110.64 | -1.30 | 0.00 |
| TRINITY_DN97541_c2_g2_i1  |       | 50.10 | 135.19 | -1.48 | 0.00 |
| TRINITY_DN97541_c2_g3_i1  |       | 10.18 | 54.62  | -2.46 | 0.00 |
| TRINITY_DN97550_c8_g1_i1  |       | 0.86  | 5.21   | -2.63 | 0.00 |
| TRINITY_DN97557_c4_g6_i1  | TCB1  | 0.31  | 4.52   | -3.56 | 0.00 |
| TRINITY_DN97574_c7_g1_i1  |       | 25.81 | 9.02   | 1.50  | 0.00 |
| TRINITY_DN97580_c0_g1_i6  | KPCD  | 3.01  | 0.14   | 4.36  | 0.00 |
| TRINITY_DN97613_c4_g1_i1  | IER2  | 79.66 | 188.00 | -1.30 | 0.00 |
| TRINITY_DN97625_c0_g2_i3  | PRRX1 | 0.02  | 3.95   | -7.86 | 0.00 |
| TRINITY_DN97672_c0_g1_i9  | MBP   | 2.14  | 0.02   | 5.74  | 0.00 |
| TRINITY_DN97698_c4_g2_i1  |       | 0.38  | 4.57   | -3.68 | 0.00 |
| TRINITY_DN97722_c3_g1_i1  | OAT   | 9.30  | 3.53   | 1.42  | 0.00 |
| TRINITY_DN97800_c5_g1_i3  | AGRF3 | 0.50  | 3.37   | -2.79 | 0.00 |
| TRINITY_DN97823_c1_g2_i6  | CNDH2 | 1.65  | 0.31   | 2.28  | 0.00 |
| TRINITY_DN97825_c1_g3_i1  | GIPC1 | 0.21  | 4.06   | -4.19 | 0.00 |
| TRINITY_DN97879_c2_g1_i1  | E2F8  | 2.52  | 0.46   | 2.46  | 0.00 |
| TRINITY_DN97883_c1_g1_i23 |       | 4.10  | 0.67   | 2.68  | 0.00 |
| TRINITY_DN97910_c1_g1_i5  | B4GT4 | 2.31  | 4.26   | -0.91 | 0.00 |
| TRINITY_DN97922_c5_g1_i1  | CENPW | 3.60  | 1.31   | 1.42  | 0.00 |
| TRINITY_DN97945_c1_g2_i2  | KTAP2 | 9.00  | 4.48   | 0.97  | 0.00 |
| TRINITY_DN97952_c1_g1_i1  | CBPZ  | 0.00  | 1.11   | -6.68 | 0.00 |

|                           |       |        |        |        |      |
|---------------------------|-------|--------|--------|--------|------|
| TRINITY_DN97952_c1_g1_i10 | CBPZ  | 0.00   | 1.65   | -6.83  | 0.00 |
| TRINITY_DN97955_c5_g2_i1  |       | 3.33   | 0.26   | 3.74   | 0.00 |
| TRINITY_DN97958_c0_g1_i1  |       | 5.12   | 11.82  | -1.23  | 0.00 |
| TRINITY_DN98010_c2_g1_i2  |       | 0.00   | 14.11  | -8.37  | 0.00 |
| TRINITY_DN98014_c1_g1_i5  | CH60  | 9.15   | 4.04   | 1.15   | 0.00 |
| TRINITY_DN98032_c4_g2_i3  | EIF3B | 21.83  | 12.24  | 0.81   | 0.00 |
| TRINITY_DN98041_c2_g1_i2  |       | 0.06   | 1.45   | -4.22  | 0.00 |
| TRINITY_DN98054_c3_g1_i3  | MK03  | 0.00   | 1.51   | -22.24 | 0.00 |
| TRINITY_DN98081_c7_g2_i1  |       | 47.75  | 135.15 | -1.55  | 0.00 |
| TRINITY_DN98163_c2_g2_i1  |       | 22.33  | 1.93   | 3.53   | 0.00 |
| TRINITY_DN98163_c3_g1_i2  | ANXA4 | 0.00   | 6.53   | -8.63  | 0.00 |
| TRINITY_DN98172_c3_g1_i9  | ENPP1 | 1.45   | 0.09   | 3.75   | 0.00 |
| TRINITY_DN98209_c5_g1_i1  | BCAT1 | 9.12   | 4.64   | 0.93   | 0.00 |
| TRINITY_DN98221_c2_g1_i2  | GRHL1 | 0.03   | 2.97   | -5.68  | 0.00 |
| TRINITY_DN98231_c1_g2_i7  | LIMD1 | 0.00   | 0.38   | -5.24  | 0.00 |
| TRINITY_DN98236_c0_g1_i10 | EF1A2 | 53.45  | 71.82  | -1.56  | 0.00 |
| TRINITY_DN98306_c0_g2_i10 |       | 0.70   | 0.00   | 5.17   | 0.00 |
| TRINITY_DN98312_c1_g2_i1  | CCNG1 | 13.53  | 16.27  | -1.35  | 0.00 |
| TRINITY_DN98347_c7_g1_i10 | LIPO  | 2.02   | 0.00   | 6.52   | 0.00 |
| TRINITY_DN98347_c7_g1_i17 | LIPO  | 18.44  | 156.21 | -3.10  | 0.00 |
| TRINITY_DN98407_c2_g1_i9  | PGH2  | 3.84   | 17.45  | -2.24  | 0.00 |
| TRINITY_DN98453_c1_g2_i3  |       | 3.36   | 0.11   | 4.83   | 0.00 |
| TRINITY_DN98453_c1_g2_i4  |       | 2.49   | 0.00   | 5.74   | 0.00 |
| TRINITY_DN98584_c0_g2_i1  | CK5P2 | 0.45   | 0.00   | 6.63   | 0.00 |
| TRINITY_DN98608_c12_g2_i2 |       | 2.00   | 7.88   | -2.03  | 0.00 |
| TRINITY_DN98613_c4_g1_i4  | MARE1 | 0.00   | 0.87   | -5.48  | 0.00 |
| TRINITY_DN98616_c1_g2_i1  |       | 22.07  | 10.71  | 1.01   | 0.00 |
| TRINITY_DN98627_c5_g1_i2  |       | 4.48   | 0.10   | 5.64   | 0.00 |
| TRINITY_DN98654_c1_g1_i2  | ZN395 | 3.54   | 5.93   | -0.77  | 0.00 |
| TRINITY_DN98662_c1_g1_i4  | GABP2 | 162.06 | 347.57 | -1.15  | 0.00 |
| TRINITY_DN98684_c1_g1_i2  | TNPO3 | 1.92   | 0.75   | 1.28   | 0.00 |
| TRINITY_DN98752_c2_g1_i5  | CTCF  | 0.00   | 2.63   | -6.99  | 0.00 |
| TRINITY_DN98785_c0_g4_i2  |       | 0.20   | 2.37   | -3.50  | 0.00 |
| TRINITY_DN98796_c0_g1_i17 | PRP39 | 0.00   | 3.01   | -8.10  | 0.00 |
| TRINITY_DN98796_c0_g1_i9  | PRP39 | 0.00   | 3.18   | -8.18  | 0.00 |
| TRINITY_DN98814_c0_g1_i2  |       | 3.11   | 5.55   | -0.87  | 0.00 |
| TRINITY_DN98828_c1_g1_i2  | AGRG1 | 0.47   | 4.18   | -3.18  | 0.00 |
| TRINITY_DN98876_c8_g4_i2  |       | 0.00   | 1.97   | -5.82  | 0.00 |
| TRINITY_DN98880_c1_g1_i3  | CNNM3 | 0.00   | 1.04   | -6.75  | 0.00 |
| TRINITY_DN98896_c7_g1_i4  |       | 6.22   | 4.47   | -2.15  | 0.00 |
| TRINITY_DN98900_c0_g4_i16 | SKT   | 0.03   | 0.37   | -3.95  | 0.00 |
| TRINITY_DN98903_c1_g1_i6  |       | 26.05  | 66.12  | -1.40  | 0.00 |

|                           |       |       |       |       |      |
|---------------------------|-------|-------|-------|-------|------|
| TRINITY_DN98914_c2_g1_i3  | RIR2  | 29.02 | 10.39 | 1.42  | 0.00 |
| TRINITY_DN98914_c3_g1_i5  |       | 0.00  | 1.39  | -5.79 | 0.00 |
| TRINITY_DN98997_c0_g1_i5  | CO6A1 | 3.52  | 39.13 | -3.54 | 0.00 |
| TRINITY_DN99029_c2_g7_i1  |       | 3.36  | 6.77  | -1.08 | 0.00 |
| TRINITY_DN99032_c0_g1_i1  | ITA4  | 0.03  | 1.93  | -6.42 | 0.00 |
| TRINITY_DN99057_c5_g2_i2  | MEF2C | 0.95  | 0.02  | 5.12  | 0.00 |
| TRINITY_DN99063_c10_g1_i4 | HDAC6 | 0.00  | 2.92  | -6.58 | 0.00 |
| TRINITY_DN99064_c0_g1_i4  | SORT1 | 2.20  | 4.95  | -1.20 | 0.00 |
| TRINITY_DN99075_c3_g1_i6  | KPCD3 | 3.02  | 4.81  | -0.70 | 0.00 |
| TRINITY_DN99087_c0_g1_i2  |       | 1.15  | 4.29  | -1.95 | 0.00 |
| TRINITY_DN99092_c3_g2_i6  | CATH  | 0.13  | 4.45  | -4.59 | 0.00 |
| TRINITY_DN99135_c2_g1_i4  | TBC17 | 0.90  | 5.92  | -3.02 | 0.00 |
| TRINITY_DN99156_c0_g1_i6  | PDCD4 | 5.63  | 7.66  | -0.48 | 0.00 |
| TRINITY_DN99187_c1_g1_i4  | SPON1 | 0.24  | 6.05  | -4.70 | 0.00 |
| TRINITY_DN99242_c6_g2_i3  |       | 8.87  | 19.06 | -1.14 | 0.00 |
| TRINITY_DN99265_c0_g3_i1  | CBS   | 6.69  | 3.94  | 0.73  | 0.00 |
| TRINITY_DN99275_c4_g1_i4  | S61A2 | 8.13  | 4.36  | 0.86  | 0.00 |
| TRINITY_DN99385_c6_g2_i4  |       | 0.57  | 3.35  | -2.64 | 0.00 |
| TRINITY_DN99440_c1_g1_i15 | K1468 | 0.45  | 2.43  | -2.41 | 0.00 |
| TRINITY_DN99441_c0_g1_i1  | MSLNL | 2.84  | 0.50  | 2.50  | 0.00 |
| TRINITY_DN99476_c3_g2_i1  | KLF6  | 22.36 | 36.01 | -0.73 | 0.00 |
| TRINITY_DN99575_c4_g1_i3  | RIR1  | 10.53 | 4.56  | 1.17  | 0.00 |
| TRINITY_DN99598_c4_g1_i4  | IF2B3 | 0.71  | 0.04  | 3.73  | 0.00 |
| TRINITY_DN99634_c0_g4_i2  | STT3A | 12.88 | 6.41  | 0.95  | 0.00 |
| TRINITY_DN99642_c3_g2_i7  | MMP2  | 0.26  | 52.23 | -7.62 | 0.00 |
| TRINITY_DN99669_c0_g2_i10 | S6A13 | 0.58  | 3.35  | -2.58 | 0.00 |
| TRINITY_DN99781_c4_g1_i16 | CKLF3 | 2.76  | 5.38  | -0.99 | 0.00 |
| TRINITY_DN99817_c2_g2_i1  | ABCAC | 0.70  | 0.16  | 2.07  | 0.00 |
| TRINITY_DN99817_c2_g2_i2  | ABCAC | 3.14  | 1.22  | 1.37  | 0.00 |
| TRINITY_DN99823_c2_g5_i3  | TBAT  | 32.52 | 19.08 | 0.72  | 0.00 |
| TRINITY_DN99825_c0_g3_i1  | CCER1 | 42.93 | 66.39 | -0.67 | 0.00 |
| TRINITY_DN99892_c0_g1_i4  | TNR6B | 0.02  | 0.75  | -5.57 | 0.00 |
| TRINITY_DN99929_c1_g1_i1  |       | 0.14  | 3.20  | -4.07 | 0.00 |
| TRINITY_DN99930_c2_g1_i7  | CDN1B | 16.28 | 26.51 | -0.73 | 0.00 |
| TRINITY_DN99937_c2_g3_i1  |       | 6.16  | 1.99  | 1.56  | 0.00 |
| TRINITY_DN99955_c1_g1_i13 | CO6A2 | 8.65  | 25.13 | -1.58 | 0.00 |
| TRINITY_DN99955_c1_g1_i8  | CO6A2 | 0.40  | 14.47 | -5.22 | 0.00 |
| TRINITY_DN99955_c1_g2_i1  | CO6A2 | 6.20  | 21.60 | -1.87 | 0.00 |
| TRINITY_DN99958_c1_g2_i1  | SYNE2 | 0.00  | 1.14  | -8.44 | 0.00 |
| TRINITY_DN99980_c4_g1_i10 | SRC8  | 0.00  | 11.73 | -9.65 | 0.00 |
| TRINITY_DN99987_c3_g1_i4  |       | 0.71  | 12.63 | -3.94 | 0.00 |

**Table S3.** The significantly enriched pathways involving differentially expressed genes of the **gill** of HT vs NT ( $P < 0.01$ )

| KEGG pathway                                         | Gene number | Background number | Rich factor | P-value | Gene enriched                                                                                                                                                                                                                             |
|------------------------------------------------------|-------------|-------------------|-------------|---------|-------------------------------------------------------------------------------------------------------------------------------------------------------------------------------------------------------------------------------------------|
| Cytokine-cytokine receptor interaction               | 32          | 165               | 0.19        | 1E-20   | IL7RA, IL21R, TNF14, CCR9, CXCR4, CCL20, TNFR9, TNFR5, IFNG, VEGFD, CXL14, CCR5, IL8, IL2RB, I13R2, XCR1, IL6ST, FLT3, CCR6, IL6RA, CCL19, I12R2, TNFA, IL2RG, GHR, I20RA, I20RB, TGFB1, CCL4, TR11B, I22R2, CCR7                         |
| Cell adhesion molecules (CAMs)                       | 20          | 137               | 0.15        | 2E-11   | CLDY, CLD4, L1CAM, TNFR5, HA1K, NECT3, HA2B, CLD6, CLD3, ICOSL, HMR1, CD276, CD2, PTPRC, HB2D, ITB2, H2-Ea, CTLA4, CD226, OCLN                                                                                                            |
| Focal adhesion                                       | 25          | 245               | 0.10        | 7E-11   | LAMC3, CO2A1, CO1A1, CO9A3, FLNA, FYN, FLNC, PAXI, CO1A2, LAMB1, TSP4B, FYNB, BIR, RAC2, CO4A2, PK3CG, DOCK2, PK3CD, ITB5, TGFI1, CTNB1, VASP, VEGFD, ACTN1, LAMB4, VAV                                                                   |
| ECM-receptor interaction                             | 12          | 80                | 0.15        | 1E-09   | CO2A1, CO9A3, CO1A1, CO1A2, LAMB1, TSP4B, LAMC3, GP1BB, ITB5, LAMB4, CO4A2, SETVS                                                                                                                                                         |
| Phagosome                                            | 20          | 156               | 0.13        | 2E-08   | NCF1, ITB2, ITB5, HA1K, CLC4M, HA2B, TSP4B, H2-Ea, HMR1, RAB5A, COR1A, HB2D, CO3, TBA3, COL12, ABCB9, CY24B, TAP2, CATS, NCF4,                                                                                                            |
| Arachidonic acid metabolism                          | 11          | 51                | 0.22        | 3E-08   | PTGIS, LOX5, LIPO, LCNL1, LKHA4, PA24F, LTC4S, PGH2, PA24A, PTGES, LOX12                                                                                                                                                                  |
| AGE-RAGE signaling pathway in diabetic complications | 14          | 124               | 0.11        | 1E-07   | CO1A1, TGFB1, CO1A2, CDN1B, PK3CG, MMP2, PK3CD, PLCG2, CY24B, PIM1, PLCB3, VEGFD, IL8, CO4A2                                                                                                                                              |
| Herpes simplex infection                             | 21          | 183               | 0.11        | 1E-06   | TNF14, IRF3, HA1K, NECT3, IFNG, HCFC1, HB2D, HG2A, TRAF3, IKBA, HMR1, CO3, H2-Ea, HA2B, ABCB9, TAP2, TRAF2, TNFA, JAK1, FADD, CSK22                                                                                                       |
| Endocytosis                                          | 36          | 340               | 0.11        | 5E-06   | PSD4, CHM4B, CBL, DYN2, SH3K1, HA1K, WASP, EHD1, VP26A, CAZA2, CCR5, IL2RB, HMR1, RAB5A, CYH4, NED4L, MPRI, FGFR4, SNX1, ARAP1, DAB2, ADRB2, CXCR4, ACAP2, PARD3, IL2RG, GIT2, AGAP1, TGFB1, ARF2, GRK6, CYH1, HSP70, ARC1B, RAB10, RAB35 |
| Intestinal immune network for IgA production         | 8           | 40                | 0.20        | 8E-06   | ICOSL, CCR9, TNFR5, TGFB1, CXCR4, HA2B, H2-Ea, HB2D,                                                                                                                                                                                      |
| Tight junction                                       | 15          | 179               | 0.08        | 2E-05   | CLDY, E41L2, CLD4, MYH9, CLD6, CLD3, SRC8, MPDZ, HCLS1, KPCT, CTNB1, PARD3, ACTN1, CSK22, OCLN                                                                                                                                            |
| NOD-like receptor signaling pathway                  | 7           | 49                | 0.14        | 2E-04   | CASPC, IKBA, ASC, PPIP1, BIR, IL8, HS90B                                                                                                                                                                                                  |

Table S3. Cont.

| KEGG pathway                           | Gene number | Background number | Rich factor | P-value | Gene enriched                                                                                                                                                                                                                                                                                                                                                                                                                                                      |
|----------------------------------------|-------------|-------------------|-------------|---------|--------------------------------------------------------------------------------------------------------------------------------------------------------------------------------------------------------------------------------------------------------------------------------------------------------------------------------------------------------------------------------------------------------------------------------------------------------------------|
| Toll-like receptor signaling pathway   | 11          | 98                | 0.11        | 6E-04   | PK3CD, M3K8, FADD, IKBA, TNFR5, IL8, IRF3, CATK, PK3CG, ICOSL, TRAF3                                                                                                                                                                                                                                                                                                                                                                                               |
| Lysosome                               | 15          | 144               | 0.10        | 6E-04   | LAP4A, DNS2A, SAP, AP1S3, NPC2, SORT1, CATS, CATH, CATZ, PPGB, CATK, MPRI, PPT2A, CD63, CATB                                                                                                                                                                                                                                                                                                                                                                       |
| Adherens junction                      | 12          | 100               | 0.12        | 7E-04   | PARD3, FYN, LMO7, FGR1A, FYNB, PTN6, ACTN1, RAC2, NECT3, CTNB1, CSK22, WASP                                                                                                                                                                                                                                                                                                                                                                                        |
| Regulation of actin cytoskeleton       | 21          | 269               | 0.08        | 1E-03   | RAC2, NCKPL, WASP, PAXI, SUPT5H, ITB2, ITAE, COF2, FGFR4, PK3CG, GELS, DOCK2, PK3CD, FGR1A, ITB5, TGF11, MOES, ARC1B, ACTN1, ARHGC, VAV,                                                                                                                                                                                                                                                                                                                           |
| Apoptosis                              | 16          | 173               | 0.09        | 2E-03   | PK3CD, TRAF2, GA45A, GRAB, BIR, CATS, IKBA, CATZ, CATH, TBA3, CATK, GRZ1, PK3CG, BID, FADD, CATB                                                                                                                                                                                                                                                                                                                                                                   |
| ABC transporters                       | 5           | 39                | 0.13        | 2E-03   | MRP2, MRP1, ABCB9, TAP2, MRP3                                                                                                                                                                                                                                                                                                                                                                                                                                      |
| Proteasome                             | 6           | 55                | 0.11        | 5E-03   | PSB7, PSA2, PSA6, PB6LB, IFNG, PSME1                                                                                                                                                                                                                                                                                                                                                                                                                               |
| Metabolic pathways                     | 71          | 1275              | 0.06        | 6E-03   | ODPX, OTC, ACSL1, CDS2, SIAT2, LPCT4, LIPO, I5P2, SDHL, SAT1, 5NTD, PNPB, AOXC, BHS, ODO2, PCKGC, CY1, PGH2, QCR1, DYR, HPSE, GSHB, PTGIS, NDUS2, GLT18, PLD4, LOX5, GCNT3, UAP1, CX6C1, TKT, PGAM1, LCNL1, PLCG2, GALT8, CDO1, 5NT3, GMDS, RPA12, KGUA, LOX12, MGT4A, SDHA, GPAT4, LTC4S, AATM, G6PD, PA24F, ALN, B4GT1, C1GLT, ALOX5, LKHA4, ADK, DGKD, GMPPB, DHE3, NRK2, NFS1, NEUA, PTGES, PPT2A, OST48, GLCNE, PA24A, ODPB, DGKZ, PLPP1, CX6B1, PLCB3, GFPT2 |
| VEGF signaling pathway                 | 9           | 81                | 0.11        | 7E-03   | PK3CD, PLCG2, TGF11, PA24F, PGH2, RAC2, PA24A, PK3CG, PAXI                                                                                                                                                                                                                                                                                                                                                                                                         |
| Nicotinate and nicotinamide metabolism | 5           | 29                | 0.17        | 8E-03   | NRK2, 5NT3, 5NTD, PNPB, AOXC                                                                                                                                                                                                                                                                                                                                                                                                                                       |
| Cytosolic DNA-sensing pathway          | 6           | 39                | 0.15        | 8E-03   | CASPC, IKBA, ASC, RIPK4, IRF3, RIPK3                                                                                                                                                                                                                                                                                                                                                                                                                               |

**Table S4.** The significantly enriched pathways involving differentially expressed genes of the **fin** of HT vs NT ( $P < 0.01$ )

| KEGG pathway                                         | Gene number | Background number | Rich factor | P-value | Gene enriched                                                                                                                                                                                                              |
|------------------------------------------------------|-------------|-------------------|-------------|---------|----------------------------------------------------------------------------------------------------------------------------------------------------------------------------------------------------------------------------|
| AGE-RAGE signaling pathway in diabetic complications | 10          | 124               | 0.08        | 0.000   | SMAD4, KPCD, CDN1B, MK03, MMP2, EGR1, PIM1, IL1B, JUN, EGR1                                                                                                                                                                |
| Herpes simplex infection                             | 10          | 183               | 0.05        | 0.000   | SOCS3, IKBA, HG2A, IL1B, JUN, CO3, HB2D, HNRPK, IKBA, EGR1                                                                                                                                                                 |
| Metabolic pathways                                   | 35          | 1275              | 0.03        | 0.000   | ODO1, PLPP3, PGH2, PGK, LIPO, PGAM1, UAP1, CBS, METK1, A9A1A, CDO1, MDHC, PCAT1, B4GT4, HGD, ENPP1, ODPX, RPN1, SIA4B, STT3A, LOX5, QCR2, GFPT1, PFKAP, ECHM, IL1B, GLT14, RIR1, PCKGC, PON2, RIR2, CY1, NDUAA, OAT, BCAT1 |
| Glycolysis / Gluconeogenesis                         | 6           | 73                | 0.08        | 0.000   | PFKAP, PCKGC, ODPX, PGK, PGAM1, A9A1A                                                                                                                                                                                      |
| Apoptosis                                            | 9           | 173               | 0.05        | 0.000   | CATH, CATK, MK03, ACTS, M3K5, IKBA, JUN, CATC, TNF10                                                                                                                                                                       |
| Toll-like receptor signaling pathway                 | 5           | 98                | 0.05        | 0.000   | CATK, MK03, IL1B, IKBA, JUN                                                                                                                                                                                                |
| p53 signaling pathway                                | 7           | 74                | 0.09        | 0.000   | TSP1, SHSA4, CCNG1, P73, CD82, RIR2, SESN1                                                                                                                                                                                 |
| Biosynthesis of amino acids                          | 6           | 86                | 0.07        | 0.001   | PGK, PGAM1, BCAT1, CBS, METK1, PFKAP                                                                                                                                                                                       |
| Focal adhesion                                       | 10          | 245               | 0.04        | 0.001   | CO6A2, TSP1, MK03, ACTS, JUN, VGFR2, CO6A1, PAXI, RAP1B, ITA4                                                                                                                                                              |
| Carbon metabolism                                    | 7           | 125               | 0.06        | 0.002   | ODO1, ODPX, PGK, PGAM1, ECHM, MDHC, PFKAP                                                                                                                                                                                  |
| Cysteine and methionine metabolism                   | 5           | 50                | 0.10        | 0.002   | CBS, METK1, BCAT1, CDO1, MDHC                                                                                                                                                                                              |
| Cytokine-cytokine receptor interaction               | 9           | 165               | 0.05        | 0.002   | CCL28, CCL25, VGFR2, IL1B, I20RB, CCL20, TNF10, CCR6, I20RA                                                                                                                                                                |
| Insulin signaling pathway                            | 6           | 173               | 0.03        | 0.003   | SOCS3, MK03, GYS1, FLOT2, CALM, SOCS3                                                                                                                                                                                      |
| Aminoacyl-tRNA biosynthesis                          | 5           | 62                | 0.08        | 0.005   | SYCC, SYAC, SYWC, SYVC, SYFB                                                                                                                                                                                               |
| Phagosome                                            | 7           | 156               | 0.04        | 0.005   | TBB, TSP1, ACTS, CO3, HGS, HB2D, S61A2                                                                                                                                                                                     |
| Ribosome                                             | 6           | 134               | 0.04        | 0.008   | RL7, RL4B, RM02, RS12, RSSA, RLP24                                                                                                                                                                                         |
| FoxO signaling pathway                               | 8           | 171               | 0.05        | 0.009   | MAD4, MK03, CDN1B, PLK2, KLF2, KLF4, PCKGC, TNF10                                                                                                                                                                          |

**Table S5.** List of DEGs associated with ECM in gill

| Gene                                            | Gene symbol | log2FC |
|-------------------------------------------------|-------------|--------|
| Collagen alpha-1(I) chain                       | CO1A1       | 1.07   |
| Collagen alpha-2(I) chain                       | CO1A2       | 1.23   |
| Collagen alpha-1(II) chain                      | CO2A1       | 3.05   |
| Collagen alpha-2(IV) chain                      | CO4A2       | 0.82   |
| Collagen alpha-3(IX) chain                      | CO9A3       | 2.36   |
| Platelet glycoprotein Ib beta chain             | GP1BB       | 1.78   |
| Integrin beta-5                                 | ITB5        | 1.04   |
| Laminin subunit beta-1                          | LAMB1       | 1.02   |
| Laminin subunit beta-4                          | LAMB4       | 1.33   |
| Laminin subunit gamma-3                         | LAMC3       | 1.19   |
| Variant-silencing SET domain-containing protein | SETVS       | -1.37  |
| Thrombospondin-4-B                              | TSP4B       | 0.97   |

**Table S6.** List of DEGs associated with CAMs in gill

| Gene                                                          | Gene symbol | log2FC |
|---------------------------------------------------------------|-------------|--------|
| Claudin-like protein ZF-A89                                   | CLDY        | -2.41  |
| Claudin-4                                                     | CLD4        | -2.56  |
| Neural cell adhesion molecule L1                              | L1CAM       | -2.20  |
| Tumor necrosis factor receptor superfamily member 5           | TNR5        | -3.64  |
| H-2 class I histocompatibility antigen, K-K alpha chain       | HA1K        | -9.48  |
| Nectin-3                                                      | NECT3       | -2.17  |
| H-2 class II histocompatibility antigen, A-B alpha chain      | HA2B        | -2.53  |
| Claudin-6                                                     | CLD6        | -5.11  |
| Claudin-3                                                     | CLD3        | -2.07  |
| ICOS ligand                                                   | ICOSL       | -2.26  |
| Major histocompatibility complex class I-related gene protein | HMR1        | -8.55  |
| CD276 antigen homolog                                         | CD276       | -2.93  |
| T-cell surface antigen CD2                                    | CD2         | -2.40  |
| Receptor-type tyrosine-protein phosphatase C                  | PTPRC       | -1.30  |
| DLA class II histocompatibility antigen, DR-1 beta chain      | HB2D        | -2.06  |
| Integrin beta-2                                               | ITB2        | -2.97  |
| H-2 class II histocompatibility antigen, A-U alpha chain-like | H2-Ea       | -2.58  |
| Cytotoxic T-lymphocyte protein 4                              | CTLA4       | -3.43  |
| CD226 antigen                                                 | CD226       | -1.99  |
| Occludin                                                      | OCLN        | -1.18  |



**Table S7.** List of DEGs associated with cell junction and adherens in gill

| Gene                                        | Gene symbol | log2FC |
|---------------------------------------------|-------------|--------|
| Alpha-actinin-1                             | ACTN1       | 0.81   |
| Multiple PDZ domain protein                 | ARC1B       | 3.37   |
| Rho guanine nucleotide exchange factor 12   | ARHGFC      | -2.62  |
| Inhibitor of apoptosis protein              | BIR         | -1.78  |
| Claudin-3                                   | CLD3        | -2.07  |
| Claudin-4                                   | CLD4        | -2.56  |
| Claudin-6                                   | CLD6        | -5.11  |
| Claudin-like protein ZF-A89                 | CLDY        | -2.41  |
| Collagen alpha-1(I) chain                   | CO1A1       | 1.07   |
| Collagen alpha-2(I) chain                   | CO1A2       | 1.23   |
| Collagen alpha-1(II) chain                  | CO2A1       | 3.05   |
| Collagen alpha-2(IV) chain                  | CO4A2       | 0.82   |
| Collagen alpha-3(IX) chain                  | CO9A3       | 2.36   |
| Cofilin-2                                   | COF2        | -0.86  |
| Casein kinase II subunit alpha              | CSK22       | 4.53   |
| Catenin beta-1                              | CTNB1       | 1.01   |
| Dedicator of cytokinesis protein 2          | DOCK2       | -3.29  |
| Band 4.1-like protein 2                     | E41L2       | -1.19  |
| Fibroblast growth factor receptor 4         | FGFR4       | 1.03   |
| Fibroblast growth factor receptor 1-A       | FGR1A       | -4.42  |
| Filamin-A                                   | FLNA        | 1.91   |
| Filamin-C                                   | FLNC        | 1.22   |
| Tyrosine-protein kinase Fyn                 | FYN         | -1.65  |
| Tyrosine-protein kinase fynb                | FYNB        | -1.55  |
| Gelsolin                                    | GELS        | -0.88  |
| Hematopoietic lineage cell-specific protein | HCLS1       | -1.49  |
| Integrin alpha-E                            | ITAE        | -1.74  |
| Integrin beta-2                             | ITB2        | -2.97  |
| Integrin beta-5                             | ITB5        | 1.04   |
| Protein kinase C theta type                 | KPCT        | -4.60  |
| Laminin subunit beta-1                      | LAMB1       | 1.02   |
| Laminin subunit beta-4                      | LAMB4       | 1.33   |
| Laminin subunit gamma-3                     | LAMC3       | 1.19   |
| LIM domain only protein 7                   | LMO7        | -7.57  |
| Moesin                                      | MOES        | -0.84  |
| Multiple PDZ domain protein                 | MPDZ        | 3.37   |
| Myosin-9                                    | MYH9        | -5.22  |
| Nck-associated protein 1-like               | NCKPL       | -2.75  |
| Nectin-3                                    | NECT3       | -2.17  |

**Table S7. Cont.**

| Gene                                                                           | Gene symbol | log2FC |
|--------------------------------------------------------------------------------|-------------|--------|
| Occludin                                                                       | OCLN        | -1.18  |
| Partitioning defective 3 homolog                                               | PARD3       | 3.52   |
| Paxillin                                                                       | PAXI        | 3.73   |
| Phosphatidylinositol 4,5-bisphosphate 3-kinase catalytic subunit delta isoform | PK3CD       | -2.18  |
| Phosphatidylinositol 4,5-bisphosphate 3-kinase catalytic subunit gamma isoform | PK3CG       | -1.98  |
| Tyrosine-protein phosphatase non-receptor type 6                               | PTN6        | -1.43  |
| Ras-related C3 botulinum toxin substrate 2                                     | RAC2        | -1.00  |
| Src substrate protein p85                                                      | SRC8        | -6.81  |
| Transcription elongation factor SPT5                                           | SUPT5H      | -2.44  |
| Transforming growth factor beta-1-induced transcript 1 protein                 | TGFI1       | 1.01   |
| Thrombospondin-4-B                                                             | TSP4B       | 0.97   |
| Vasodilator-stimulated phosphoprotein                                          | VASP        | -1.65  |
| Proto-oncogene vav                                                             | VAV         | -1.61  |
| Vascular endothelial growth factor D                                           | VEGFD       | 4.78   |
| Wiskott-Aldrich syndrome protein homolog                                       | WASP        | -3.68  |

**Table S8.** List of DEGs associated with glycolysis in fin

| Gene                                               | Gene symbol | log2FC |
|----------------------------------------------------|-------------|--------|
| Aldehyde dehydrogenase family 9 member A1-A        | A9A1A       | 6.93   |
| Pyruvate dehydrogenase protein X component         | ODPX        | 6.74   |
| Phosphoenolpyruvate carboxykinase, cytosolic       | PCKGC       | -5.67  |
| ATP-dependent 6-phosphofructokinase, platelet type | PFKAP       | 4.98   |
| Phosphoglycerate mutase 1                          | PGAM1       | 1.11   |
| Phosphoglycerate kinase                            | PGK         | 1.32   |

**Table S9.** List of DEGs associated with p53 signaling pathway in fin

| Gene                                            | Gene symbol | log2FC |
|-------------------------------------------------|-------------|--------|
| Thrombospondin-1                                | TSP1        | -3.51  |
| Protein shisa-4                                 | SHSA4       | -6.58  |
| Cyclin-G1                                       | CCNG1       | -1.35  |
| Tumor protein p73                               | P73         | 22.72  |
| CD82 antigen                                    | CD82        | -8.18  |
| Ribonucleoside-diphosphate reductase subunit M2 | RIR2        | 1.42   |
| Sestrin-1                                       | SESN1       | -1.18  |
